# Supplementary material for: Breeding Driven Enrichment of Genetic Variation for Key Yield Components and Grain Starch Content Under Drought Stress in Winter Wheat
Source: Front Plant Sci. 2021 Aug 16;12:684205. doi: 10.3389/fpls.2021.684205 (PMC8415485; doi:10.3389/fpls.2021.684205)
Supplement: Supplementary file 2 [file Data_Sheet_2.xlsx]

## Sheet: Table_Sxl1
Traits_MarkerCode	Treatment	TraitCategory	Traits	Marker_code	MarkerName	Trait	Chr	Pos	MarkerR2	MarkerR2 (%)	pval_r	Benj005FDR	MTAS.Pvalue.significance
Ds_PH_W135_AAVC	Drought	Agro	PH	W135_AAVC	AX-108762506	Ds_PH	1D	8606804	0.07995	7.995	2.95e-05	1.06e-05	p<10-4
Rf_PH_W135_ACEE	Rainfed	Agro	PH	W135_ACEE	AX-108824428	Rf_PH	4B	14343341	0.07002	7.002	8.16e-05	1.48e-05	p<10-4
Ds_SDW_W135_ACNW	Drought	Agro	SDW	W135_ACNW	AX-108843940	Ds_SDW	7B	488411894	0.07862	7.862	5.86e-05	2.75e-05	p<10-4
Rf_KNSp_W135_ADVC	Rainfed	Agro	KNSp	W135_ADVC	AX-108905462	Rf_KNSp	5A	586152838	0.08866	8.866	9.07e-06	2.12e-06	p<10-4
Rf_KNSp_W135_AFBF	Rainfed	Agro	KNSp	W135_AFBF	AX-108978632	Rf_KNSp	5A	588023218	0.08866	8.866	9.07e-06	4.23e-06	p<10-4
Ds_GY_W135_AFHU	Drought	Agro	GY	W135_AFHU	AX-109274463	Ds_GY	7A	79654271	0.08079	8.079	4.29e-05	4.23e-06	p<10-4
Ds_SDW_W135_AFMS	Drought	Agro	SDW	W135_AFMS	AX-109283472	Ds_SDW	7B	518389026	0.07708	7.708	6.67e-05	3.81e-05	p<10-4
Ds_SDW_W135_AGKP	Drought	Agro	SDW	W135_AGKP	AX-109328820	Ds_SDW	7B	573023414	0.11291	11.291	1.01e-06	2.12e-06	p<10-4
Ds_SDW_W135_AIDF	Drought	Agro	SDW	W135_AIDF	AX-109411217	Ds_SDW	7B	506562643	0.09536	9.536	8.48e-06	8.46e-06	p<10-4
Rf_SDW_W135_AJWO	Rainfed	Agro	SDW	W135_AJWO	AX-109506123	Rf_SDW	5D	528818863	0.08109	8.109	2.5e-05	2.12e-06	p<10-4
Rf_PBW_W135_AJWO	Rainfed	Agro	PBW	W135_AJWO	AX-109506123	Rf_PBW	5D	528818863	0.07438	7.438	5.13e-05	2.12e-06	p<10-4
Rf_KNSp_W135_ALDH	Rainfed	Agro	KNSp	W135_ALDH	AX-109855651	Rf_KNSp	4A	594530554	0.08617	8.617	3.88e-05	1.69e-05	p<10-4
Ds_SDW_W135_ANMF	Drought	Agro	SDW	W135_ANMF	AX-109972627	Ds_SDW	7B	506627270	0.08669	8.669	8.48e-06	1.06e-05	p<10-4
Rf_PH_W135_AQGS	Rainfed	Agro	PH	W135_AQGS	AX-110400483	Rf_PH	4B	14654168	0.10027	10.027	8.73e-06	2.12e-06	p<10-4
Rf_KNSp_W135_ARBW	Rainfed	Agro	KNSp	W135_ARBW	AX-110437108	Rf_KNSp	7B	657869278	0.0838	8.38	6.17e-05	2.96e-05	p<10-4
Ds_SDW_W135_AROT	Drought	Agro	SDW	W135_AROT	AX-110459436	Ds_SDW	7B	505451721	0.09484	9.484	8.48e-06	1.27e-05	p<10-4
Ds_GSC_W135_ASTQ	Drought	GQT	GSC	W135_ASTQ	AX-110518414	Ds_GSC	5D	542108342	0.06588	6.588	8.1e-05	1.06e-05	p<10-4
Ds_SDW_W135_ATUW	Drought	Agro	SDW	W135_ATUW	AX-110575183	Ds_SDW	7B	572649824	0.11291	11.291	1.01e-06	4.23e-06	p<10-4
Rf_KNSp_W135_AUZL	Rainfed	Agro	KNSp	W135_AUZL	AX-110921889	Rf_KNSp	5A	588551159	0.08866	8.866	9.07e-06	6.35e-06	p<10-4
Ds_SDW_W135_AVQF	Drought	Agro	SDW	W135_AVQF	AX-110949736	Ds_SDW	7B	506373000	0.09535	9.535	8.48e-06	1.48e-05	p<10-4
Year_Rel		BP	YR	W135_AYGO	AX-111076088	Year_Rel	3A	503027279	0.07986	7.986	NA	1.90371e-05	p<10-4
Rf_KNSp_W135_AZDG	Rainfed	Agro	KNSp	W135_AZDG	AX-111124268	Rf_KNSp	5A	588846051	0.09539	9.539	4.08e-05	1.9e-05	p<10-4
Rf_KNSp_W135_AZWM	Rainfed	Agro	KNSp	W135_AZWM	AX-111449506	Rf_KNSp	5A	588854613	0.07621	7.621	4.08e-05	2.12e-05	p<10-4
Rf_PH_W135_BASV	Rainfed	Agro	PH	W135_BASV	AX-111486916	Rf_PH	5B	587071133	0.06849	6.849	3.98e-05	1.06e-05	p<10-4
Year_Rel		BP	YR	W135_BCEM	AX-111550596	Year_Rel	3A	502837641	0.08329	8.329	NA	1.69219e-05	p<10-4
Ds_PBW_W135_BCLB	Drought	Agro	PBW	W135_BCLB	AX-111561744	Ds_PBW	2D	23416219	0.09632	9.632	9.15e-06	2.12e-06	p<10-4
Ds_PH_W135_CHNF	Drought	Agro	PH	W135_CHNF	AX-158535753	Ds_PH	6B	51225191	0.07496	7.496	7.23e-05	2.75e-05	p<10-4
Year_Rel		BP	YR	W135_CKWQ	AX-158538026	Year_Rel	2A	94277212	0.07902	7.902	NA	2.96133e-05	p<10-4
Rf_KNSp_W135_COMQ	Rainfed	Agro	KNSp	W135_COMQ	AX-158540470	Rf_KNSp	1D	33470449	0.07457	7.457	7.94e-05	3.6e-05	p<10-4
Ds_KNSp_W135_CRAK	Drought	Agro	KNSp	W135_CRAK	AX-158542180	Ds_KNSp	4A	3364726	0.10752	10.752	3.74e-06	2.12e-06	p<10-4
Ds_SDW_W135_CRZT	Drought	Agro	SDW	W135_CRZT	AX-158542839	Ds_SDW	5A	11066945	0.07213	7.213	9.22e-05	4.65e-05	p<10-4
Ds_KNSp_W135_CUXI	Drought	Agro	KNSp	W135_CUXI	AX-158544804	Ds_KNSp	1B	622572028	0.08243	8.243	4.23e-05	8.46e-06	p<10-4
Ds_PH_W135_CWHQ	Drought	Agro	PH	W135_CWHQ	AX-158545748	Ds_PH	1D	8226969	0.07896	7.896	4.57e-05	1.48e-05	p<10-4
Ds_SDW_W135_DIKJ	Drought	Agro	SDW	W135_DIKJ	AX-158553931	Ds_SDW	7B	518383397	0.06997	6.997	5.86e-05	2.96e-05	p<10-4
Rf_KNSp_W135_EXIH	Rainfed	Agro	KNSp	W135_EXIH	AX-158581593	Rf_KNSp	4A	594659453	0.08322	8.322	5.73e-05	2.75e-05	p<10-4
Ds_GSC_W135_FEPU	Drought	GQT	GSC	W135_FEPU	AX-158586520	Ds_GSC	5D	546839205	0.07258	7.258	7.15e-05	8.46e-06	p<10-4
Ds_SDW_W135_FNIZ	Drought	Agro	SDW	W135_FNIZ	AX-158592427	Ds_SDW	7B	572654422	0.11291	11.291	1.01e-06	6.35e-06	p<10-4
Ds_HI_W135_FUPW	Drought	Agro	HI	W135_FUPW	AX-158597338	Ds_HI	2B	69043294	0.07836	7.836	5.22e-05	2.12e-06	p<10-4
Ds_SDW_W135_FVHQ	Drought	Agro	SDW	W135_FVHQ	AX-158597800	Ds_SDW	2D	22200782	0.09006	9.006	1.11e-05	1.9e-05	p<10-4
Rf_KNSp_W135_FXMA	Rainfed	Agro	KNSp	W135_FXMA	AX-158599266	Rf_KNSp	5A	589296327	0.07621	7.621	4.08e-05	2.33e-05	p<10-4
Rf_KNSp_W135_GAQT	Rainfed	Agro	KNSp	W135_GAQT	AX-158601417	Rf_KNSp	7B	657868085	0.08212	8.212	6.17e-05	3.17e-05	p<10-4
Year_Rel		BP	YR	W135_GQWE	AX-158612374	Year_Rel	3A	502397511	0.09949	9.949	NA	2.11524e-06	p<10-4
Rf_PH_W135_HAHZ	Rainfed	Agro	PH	W135_HAHZ	AX-158618765	Rf_PH	4B	14396083	0.0876	8.76	6.29e-05	1.27e-05	p<10-4
Rf_PH_W135_HAIA	Rainfed	Agro	PH	W135_HAIA	AX-158618766	Rf_PH	4B	15268438	0.08015	8.015	8.73e-06	4.23e-06	p<10-4
Ds_PH_W135_HNTK	Drought	Agro	PH	W135_HNTK	AX-86171904	Ds_PH	1D	8606637	0.08103	8.103	2.76e-05	8.46e-06	p<10-4
Ds_SDW_W135_HOJU	Drought	Agro	SDW	W135_HOJU	AX-89310598	Ds_SDW	2B	418276688	0.07539	7.539	7.35e-05	4.02e-05	p<10-4
Rf_KNSp_W135_HOMY	Rainfed	Agro	KNSp	W135_HOMY	AX-89343036	Rf_KNSp	6A	16229407	0.0818	8.18	5.44e-05	2.54e-05	p<10-4
Ds_SDW_W135_HRNH	Drought	Agro	SDW	W135_HRNH	AX-94705176	Ds_SDW	7B	518386661	0.07862	7.862	5.86e-05	3.17e-05	p<10-4
Ds_PH_W15_ADHO	Drought	Agro	PH	W15_ADHO	BobWhite_c1715_887	Ds_PH	1D	8185547	0.07178	7.178	7.58e-05	2.96e-05	p<10-4
Ds_SDW_W15_AEAU	Drought	Agro	SDW	W15_AEAU	BobWhite_rep_c63008_468	Ds_SDW	7B	506561102	0.10165	10.165	8.48e-06	1.69e-05	p<10-4
Ds_SN_W15_AACC	Drought	Agro	SN	W15_AACC	BS00004466_51	Ds_SN	6A	599035194	0.08129	8.129	4.58e-05	2.12e-06	p<10-4
Rf_KNSp_W15_AAVA	Rainfed	Agro	KNSp	W15_AAVA	BS00027054_51	Rf_KNSp	7B	654950222	0.08642	8.642	1.96e-05	1.27e-05	p<10-4
Ds_KNSp_W15_AAZD	Drought	Agro	KNSp	W15_AAZD	BS00035307_51	Ds_KNSp	4A	3381284	0.08386	8.386	3.64e-05	6.35e-06	p<10-4
Rf_KNSp_W15_ABBH	Rainfed	Agro	KNSp	W15_ABBH	BS00039118_51	Rf_KNSp	7B	656929260	0.07463	7.463	9.22e-05	3.81e-05	p<10-4
Rf_KNSp_W15_ABPJ	Rainfed	Agro	KNSp	W15_ABPJ	BS00064146_51	Rf_KNSp	7B	655818427	0.08642	8.642	1.96e-05	1.48e-05	p<10-4
Ds_GSC_W15_ACEB	Drought	GQT	GSC	W15_ACEB	BS00073116_51	Ds_GSC	5D	546864069	0.07258	7.258	5.46e-05	2.12e-06	p<10-4
Rf_KNSp_W15_ACWV	Rainfed	Agro	KNSp	W15_ACWV	BS00101408_51	Rf_KNSp	7B	657662537	0.09407	9.407	1.89e-05	1.06e-05	p<10-4
Ds_PH_W15_ACXW	Drought	Agro	PH	W15_ACXW	BS00105054_51	Ds_PH	5B	558625399	0.08065	8.065	7.09e-05	2.12e-05	p<10-4
Ds_KNSp_W15_ACYP	Drought	Agro	KNSp	W15_ACYP	BS00106545_51	Ds_KNSp	4A	3445106	0.07898	7.898	7.54e-05	1.06e-05	p<10-4
Ds_SDW_W15_AEFY	Drought	Agro	SDW	W15_AEFY	CAP12_c606_221	Ds_SDW	7B	520418470	0.07494	7.494	9.18e-05	4.23e-05	p<10-4
Ds_PH_W15_AEGH	Drought	Agro	PH	W15_AEGH	CAP12_rep_c4520_207	Ds_PH	5B	487462532	0.09124	9.124	1.29e-05	2.12e-06	p<10-4
Year_Rel		BP	YR	W15_AEUF	Excalibur_c10046_579	Year_Rel	5D	160064709	0.09936	9.936	NA	2.11524e-05	p<10-4
Ds_GSC_W15_AFHL	Drought	GQT	GSC	W15_AFHL	Excalibur_c28592_173	Ds_GSC	5D	546910383	0.07282	7.282	5.46e-05	4.23e-06	p<10-4
Ds_SDW_W15_AFLT	Drought	Agro	SDW	W15_AFLT	Excalibur_c36408_381	Ds_SDW	7B	508659416	0.07862	7.862	5.86e-05	3.38e-05	p<10-4
Ds_GSC_W15_AFOO	Drought	GQT	GSC	W15_AFOO	Excalibur_c42190_383	Ds_GSC	5D	546906350	0.07282	7.282	5.46e-05	6.35e-06	p<10-4
Ds_PH_W15_AFUH	Drought	Agro	PH	W15_AFUH	Excalibur_c5329_1335	Ds_PH	5B	580686304	0.0805	8.05	3.61e-05	1.27e-05	p<10-4
Rf_TKW_W15_AGXR	Rainfed	Agro	TKW	W15_AGXR	GENE_3659_104	Rf_TKW	6A	101302690	0.07645	7.645	4.71e-05	2.12e-06	p<10-4
Ds_PH_W15_AIFL	Drought	Agro	PH	W15_AIFL	Ku_c11150_773	Ds_PH	5B	487831488	0.08557	8.557	2.62e-05	6.35e-06	p<10-4
Rf_KNSp_W15_AJSU	Rainfed	Agro	KNSp	W15_AJSU	Kukri_c6669_145	Rf_KNSp	5A	588872163	0.08289	8.289	1.8e-05	8.46e-06	p<10-4
Ds_SDW_W15_ALAW	Drought	Agro	SDW	W15_ALAW	RAC875_c2887_52	Ds_SDW	7B	518386568	0.07494	7.494	9.18e-05	4.44e-05	p<10-4
Ds_SDW_W15_ALXV	Drought	Agro	SDW	W15_ALXV	RAC875_c7474_1661	Ds_SDW	7B	505939784	0.09291	9.291	1.37e-05	2.12e-05	p<10-4
Ds_GY_W15_ALYA	Drought	Agro	GY	W15_ALYA	RAC875_c75528_355	Ds_GY	7A	79648907	0.08826	8.826	3.51e-05	2.12e-06	p<10-4
Year_Rel		BP	YR	W15_ANKM	TA002565_0478	Year_Rel	5D	107584042	0.07841	7.841	NA	2.74981e-05	p<10-4
Ds_PH_W15_ANKY	Drought	Agro	PH	W15_ANKY	TA002756_0960	Ds_PH	5B	558342508	0.08065	8.065	7.09e-05	2.33e-05	p<10-4
Ds_SDW_W15_AOLP	Drought	Agro	SDW	W15_AOLP	Tdurum_contig43589_340	Ds_SDW	7B	505939784	0.09247	9.247	1.37e-05	2.33e-05	p<10-4
Ds_SDW_W15_AOLQ	Drought	Agro	SDW	W15_AOLQ	Tdurum_contig43589_825	Ds_SDW	7B	505938969	0.09247	9.247	1.37e-05	2.54e-05	p<10-4
Ds_SN_W15_APCA	Drought	Agro	SN	W15_APCA	Tdurum_contig75700_411	Ds_SN	6A	598635440	0.06446	6.446	6.23e-05	4.23e-06	p<10-4
Ds_SDW_W15_APQG	Drought	Agro	SDW	W15_APQG	wsnp_BE443010B_Ta_2_1	Ds_SDW	7B	518919139	0.07585	7.585	9.29e-05	4.87e-05	p<10-4
Ds_PH_W15_AQCL	Drought	Agro	PH	W15_AQCL	wsnp_Ex_c1085_2078944	Ds_PH	1D	8185547	0.07204	7.204	7.16e-05	2.54e-05	p<10-4
Ds_PH_W15_AQHG	Drought	Agro	PH	W15_AQHG	wsnp_Ex_c1358_2600929	Ds_PH	1D	8605331	0.07333	7.333	4.63e-05	1.69e-05	p<10-4
Ds_PH_W15_AQHH	Drought	Agro	PH	W15_AQHH	wsnp_Ex_c1358_2602235	Ds_PH	1D	8606637	0.06374	6.374	4.63e-05	1.9e-05	p<10-4
Year_Rel		BP	YR	W15_AQVW	wsnp_Ex_c2678_4968284	Year_Rel	3A	502386615	0.0911	9.11	NA	8.46095e-06	p<10-4
Ds_PH_W15_AREA	Drought	Agro	PH	W15_AREA	wsnp_Ex_c41048_47969948	Ds_PH	1D	216862	0.06117	6.117	9.34e-05	3.17e-05	p<10-4
Ds_SDW_W15_ARGY	Drought	Agro	SDW	W15_ARGY	wsnp_Ex_c4804_8579139	Ds_SDW	7B	518386294	0.07862	7.862	5.86e-05	3.6e-05	p<10-4
Year_Rel		BP	YR	W15_AROJ	wsnp_Ex_c65985_64188864	Year_Rel	5D	192270194	0.09451	9.451	NA	1.48067e-05	p<10-4
Year_Rel		BP	YR	W15_ARZE	wsnp_Ex_rep_c67164_65655648	Year_Rel	5D	107583849	0.08255	8.255	NA	2.53829e-05	p<10-4
Ds_KNSp_W15_ASHA	Drought	Agro	KNSp	W15_ASHA	wsnp_JD_c64_103934	Ds_KNSp	4A	3445091	0.08698	8.698	2.62e-05	4.23e-06	p<10-4
Year_Rel		BP	YR	W15_ASPW	wsnp_Ku_c3343_6206887	Year_Rel	3A	502385045	0.0911	9.11	NA	6.34571e-06	p<10-4
Year_Rel		BP	YR	W15_ASQX	wsnp_Ku_c3956_7237707	Year_Rel	3A	502402842	0.11335	11.335	NA	4.23048e-06	p<10-4
Year_Rel		BP	YR	W15_ASWO	wsnp_Ku_rep_c72922_72561803	Year_Rel	5D	123499728	0.09457	9.457	NA	1.26914e-05	p<10-4
Ds_GSC_W135_AAMC	Drought	GQT	GSC	W135_AAMC	AX-108745697	Ds_GSC	5D	548024699	0.0612	6.12	0.000163438	1.69e-05	p<10-3
Ds_GY_W135_ABQA	Drought	Agro	GY	W135_ABQA	AX-108798856	Ds_GY	7A	83789802	0.06051	6.051	0.000331802	1.27e-05	p<10-3
Ds_KN_W135_ADAA	Drought	Agro	KN	W135_ADAA	AX-108865765	Ds_KN	3B	782447441	0.0668	6.68	0.000286778	8.46e-06	p<10-3
Rf_TKW_W135_ADAU	Rainfed	Agro	TKW	W135_ADAU	AX-108867032	Rf_TKW	3B	710591706	0.06692	6.692	0.000216824	1.48e-05	p<10-3
Ds_GSC_W135_AEEM	Drought	GQT	GSC	W135_AEEM	AX-108927251	Ds_GSC	3B	243245526	0.04991	4.991	0.000594798	3.6e-05	p<10-3
Ds_PH_W135_AEKN	Drought	Agro	PH	W135_AEKN	AX-108940623	Ds_PH	3B	571763129	0.05913	5.913	0.000255114	5.08e-05	p<10-3
Ds_PBW_W135_AFHU	Drought	Agro	PBW	W135_AFHU	AX-109274463	Ds_PBW	7A	79654271	0.06299	6.299	0.000357511	2.54e-05	p<10-3
Ds_SN_W135_AGCU	Drought	Agro	SN	W135_AGCU	AX-109313351	Ds_SN	2A	775101357	0.06803	6.803	0.000498636	1.69e-05	p<10-3
Rf_KN_W135_AGGX	Rainfed	Agro	KN	W135_AGGX	AX-109321670	Rf_KN	6B	646578509	0.05798	5.798	0.000671037	2.54e-05	p<10-3
Rf_HI_W135_AGNO	Rainfed	Agro	HI	W135_AGNO	AX-109333268	Rf_HI	6A	580190968	0.05667	5.667	0.000624487	4.02e-05	p<10-3
Rf_KNSp_W135_AHQK	Rainfed	Agro	KNSp	W135_AHQK	AX-109385965	Rf_KNSp	7B	656520773	0.07354	7.354	0.000149384	4.23e-05	p<10-3
Rf_KN_W135_AHQK	Rainfed	Agro	KN	W135_AHQK	AX-109385965	Rf_KN	7B	656520773	0.05969	5.969	0.000522787	2.12e-05	p<10-3
Rf_HI_W135_AIRY	Rainfed	Agro	HI	W135_AIRY	AX-109441900	Rf_HI	1A	110074197	0.06179	6.179	0.000610474	2.54e-05	p<10-3
Rf_HI_W135_AJAS	Rainfed	Agro	HI	W135_AJAS	AX-109460860	Rf_HI	1A	151872882	0.06179	6.179	0.000965103	5.08e-05	p<10-3
Rf_KNSp_W135_AKLL	Rainfed	Agro	KNSp	W135_AKLL	AX-109823246	Rf_KNSp	7B	656511018	0.07402	7.402	0.000142999	4.02e-05	p<10-3
Rf_PH_W135_AKUU	Rainfed	Agro	PH	W135_AKUU	AX-109838620	Rf_PH	7B	466048068	0.07062	7.062	0.00022647	2.12e-05	p<10-3
Ds_PH_W135_AKUU	Drought	Agro	PH	W135_AKUU	AX-109838620	Ds_PH	7B	466048068	0.07086	7.086	0.000203555	4.23e-05	p<10-3
Ds_PH_W135_AKUV	Drought	Agro	PH	W135_AKUV	AX-109838796	Ds_PH	3B	562271095	0.06923	6.923	0.000379053	5.71e-05	p<10-3
Rf_TKW_W135_ALCA	Rainfed	Agro	TKW	W135_ALCA	AX-109853278	Rf_TKW	1B	640561024	0.06209	6.209	0.000231986	1.69e-05	p<10-3
Rf_NDF_W135_ALDH	Rainfed	GQT	NDF	W135_ALDH	AX-109855651	Rf_NDF	4A	594530554	0.07192	7.192	0.000118365	2.12e-06	p<10-3
Rf_SN_W135_ALZA	Rainfed	Agro	SN	W135_ALZA	AX-109895267	Rf_SN	4B	643791949	0.0624	6.24	0.000397888	4.23e-06	p<10-3
Rf_HI_W135_AMJI	Rainfed	Agro	HI	W135_AMJI	AX-109913012	Rf_HI	6D	4283706	0.06033	6.033	0.000419188	1.06e-05	p<10-3
Rf_TKW_W135_APNT	Rainfed	Agro	TKW	W135_APNT	AX-110366829	Rf_TKW	1B	640850820	0.07201	7.201	0.000129566	6.35e-06	p<10-3
Rf_NDF_W135_AQAT	Rainfed	GQT	NDF	W135_AQAT	AX-110389563	Rf_NDF	4A	593736783	0.06561	6.561	0.000263711	1.69e-05	p<10-3
Ds_KNSp_W135_AQLU	Drought	Agro	KNSp	W135_AQLU	AX-110409075	Ds_KNSp	1A	505669949	0.05642	5.642	0.000727964	2.12e-05	p<10-3
Rf_SN_W135_AQPC	Rainfed	Agro	SN	W135_AQPC	AX-110415449	Rf_SN	4B	643786166	0.0624	6.24	0.000397888	6.35e-06	p<10-3
Rf_KN_W135_ARBW	Rainfed	Agro	KN	W135_ARBW	AX-110437108	Rf_KN	7B	657869278	0.08318	8.318	0.00024401	8.46e-06	p<10-3
Ds_GSC_W135_ARMT	Drought	GQT	GSC	W135_ARMT	AX-110455856	Ds_GSC	5D	542659379	0.05649	5.649	0.000169595	1.9e-05	p<10-3
Rf_TKW_W135_ARTR	Rainfed	Agro	TKW	W135_ARTR	AX-110469141	Rf_TKW	2A	649562157	0.0615	6.15	0.000654915	3.38e-05	p<10-3
Rf_HI_W135_ARUE	Rainfed	Agro	HI	W135_ARUE	AX-110470283	Rf_HI	6D	4282958	0.06748	6.748	0.000364853	8.46e-06	p<10-3
Ds_PH_W135_ASED	Drought	Agro	PH	W135_ASED	AX-110487944	Ds_PH	5B	475586032	0.0659	6.59	0.000912853	7.83e-05	p<10-3
Ds_SN_W135_ATEQ	Drought	Agro	SN	W135_ATEQ	AX-110540302	Ds_SN	3B	22772880	0.06345	6.345	0.000323251	1.27e-05	p<10-3
Ds_PH_W135_ATEY	Drought	Agro	PH	W135_ATEY	AX-110540403	Ds_PH	6A	25018001	0.06553	6.553	0.000883794	7.19e-05	p<10-3
Rf_HI_W135_ATPI	Rainfed	Agro	HI	W135_ATPI	AX-110562572	Rf_HI	1A	119496744	0.06179	6.179	0.000965103	5.29e-05	p<10-3
Rf_KN_W135_AULP	Rainfed	Agro	KN	W135_AULP	AX-110609724	Rf_KN	4B	43751460	0.06163	6.163	0.000366831	1.48e-05	p<10-3
Rf_HI_W135_AVBC	Rainfed	Agro	HI	W135_AVBC	AX-110924520	Rf_HI	1A	154577538	0.06179	6.179	0.000610474	2.75e-05	p<10-3
Rf_SN_W135_AVHC	Rainfed	Agro	SN	W135_AVHC	AX-110935119	Rf_SN	5D	543835634	0.05968	5.968	0.000674838	1.48e-05	p<10-3
Rf_HI_W135_AVOA	Rainfed	Agro	HI	W135_AVOA	AX-110945767	Rf_HI	6A	579765818	0.05935	5.935	0.000624487	4.23e-05	p<10-3
Rf_SN_W135_AWHV	Rainfed	Agro	SN	W135_AWHV	AX-110981509	Rf_SN	2B	554297763	0.05776	5.776	0.000439929	1.06e-05	p<10-3
Rf_SDW_W135_AWIF	Rainfed	Agro	SDW	W135_AWIF	AX-110981962	Rf_SDW	2A	706228548	0.06066	6.066	0.000839801	1.27e-05	p<10-3
Rf_HI_W135_AWTE	Rainfed	Agro	HI	W135_AWTE	AX-111002754	Rf_HI	1A	176452480	0.06179	6.179	0.000610474	2.96e-05	p<10-3
Rf_HI_W135_AXAF	Rainfed	Agro	HI	W135_AXAF	AX-111014967	Rf_HI	1A	125151717	0.06231	6.231	0.000610474	3.17e-05	p<10-3
Rf_GSC_W135_AYGO	Rainfed	GQT	GSC	W135_AYGO	AX-111076088	Rf_GSC	3A	503027279	0.07005	7.005	0.000141954	1.27e-05	p<10-3
Rf_KN_W135_AYKB	Rainfed	Agro	KN	W135_AYKB	AX-111081978	Rf_KN	4B	36447963	0.05928	5.928	0.000647424	2.33e-05	p<10-3
Rf_GSC_W135_BAGB	Rainfed	GQT	GSC	W135_BAGB	AX-111466275	Rf_GSC	3B	187575142	0.06841	6.841	0.000327476	2.12e-05	p<10-3
Rf_HI_W135_BAGV	Rainfed	Agro	HI	W135_BAGV	AX-111467791	Rf_HI	1A	152408535	0.05667	5.667	0.000965103	5.5e-05	p<10-3
Rf_KNSp_W135_BAGZ	Rainfed	Agro	KNSp	W135_BAGZ	AX-111468265	Rf_KNSp	7B	656528752	0.0615	6.15	0.000593511	6.56e-05	p<10-3
Rf_GSC_W135_BCEM	Rainfed	GQT	GSC	W135_BCEM	AX-111550596	Rf_GSC	3A	502837641	0.06725	6.725	0.000177625	1.9e-05	p<10-3
Ds_SDW_W135_BCLB	Drought	Agro	SDW	W135_BCLB	AX-111561744	Ds_SDW	2D	23416219	0.06652	6.652	0.000168482	5.29e-05	p<10-3
Ds_PH_W135_BCLB	Drought	Agro	PH	W135_BCLB	AX-111561744	Ds_PH	2D	23416219	0.06058	6.058	0.000179763	3.81e-05	p<10-3
Ds_GY_W135_BCLB	Drought	Agro	GY	W135_BCLB	AX-111561744	Ds_GY	2D	23416219	0.07091	7.091	0.000144236	8.46e-06	p<10-3
Rf_KNSp_W135_BEMF	Rainfed	Agro	KNSp	W135_BEMF	AX-111669197	Rf_KNSp	4A	594701451	0.06522	6.522	0.000201992	4.44e-05	p<10-3
Ds_PH_W135_BNPD	Drought	Agro	PH	W135_BNPD	AX-158522283	Ds_PH	2D	470056544	0.06419	6.419	0.000199889	4.02e-05	p<10-3
Rf_PH_W135_BNPD	Rainfed	Agro	PH	W135_BNPD	AX-158522283	Rf_PH	2D	470056544	0.06767	6.767	0.000157047	1.69e-05	p<10-3
Rf_GPC_W135_BOAT	Rainfed	GQT	GPC	W135_BOAT	AX-158522585	Rf_GPC	2D	30264123	0.05599	5.599	0.000843173	8.46e-06	p<10-3
Ds_SDW_W135_BQDI	Drought	Agro	SDW	W135_BQDI	AX-158524004	Ds_SDW	3A	14056900	0.05762	5.762	0.000616986	8.04e-05	p<10-3
Rf_GSC_W135_BQPQ	Rainfed	GQT	GSC	W135_BQPQ	AX-158524324	Rf_GSC	4A	635955424	0.05889	5.889	0.00033099	2.33e-05	p<10-3
Ds_PH_W135_BSYK	Drought	Agro	PH	W135_BSYK	AX-158525904	Ds_PH	5B	461576169	0.0636	6.36	0.000913639	8.04e-05	p<10-3
Ds_PH_W135_BSYM	Drought	Agro	PH	W135_BSYM	AX-158525906	Ds_PH	5B	462126267	0.06731	6.731	0.000674051	6.35e-05	p<10-3
Rf_HI_W135_BUXX	Rainfed	Agro	HI	W135_BUXX	AX-158527243	Rf_HI	6A	579763467	0.05667	5.667	0.000624487	4.44e-05	p<10-3
Rf_GPC_W135_BUYL	Rainfed	GQT	GPC	W135_BUYL	AX-158527257	Rf_GPC	6A	599035336	0.0642	6.42	0.000224388	4.23e-06	p<10-3
Ds_PBW_W135_BWXY	Drought	Agro	PBW	W135_BWXY	AX-158528596	Ds_PBW	6B	593356212	0.06001	6.001	0.000228432	1.27e-05	p<10-3
Ds_PBW_W135_BWXZ	Drought	Agro	PBW	W135_BWXZ	AX-158528597	Ds_PBW	6B	592465797	0.06632	6.632	0.000228432	1.48e-05	p<10-3
Ds_GY_W135_BWXZ	Drought	Agro	GY	W135_BWXZ	AX-158528597	Ds_GY	6B	592465797	0.05682	5.682	0.000698374	2.12e-05	p<10-3
Ds_PBW_W135_BWYC	Drought	Agro	PBW	W135_BWYC	AX-158528600	Ds_PBW	6B	593370575	0.06001	6.001	0.000537162	3.6e-05	p<10-3
Ds_PBW_W135_BWYD	Drought	Agro	PBW	W135_BWYD	AX-158528601	Ds_PBW	6B	592945368	0.06001	6.001	0.000537162	3.81e-05	p<10-3
Ds_PBW_W135_BWYF	Drought	Agro	PBW	W135_BWYF	AX-158528603	Ds_PBW	6B	595294931	0.07579	7.579	0.000228432	1.69e-05	p<10-3
Ds_GY_W135_BWYF	Drought	Agro	GY	W135_BWYF	AX-158528603	Ds_GY	6B	595294931	0.07175	7.175	0.000698374	2.33e-05	p<10-3
Ds_PH_W135_BYDH	Drought	Agro	PH	W135_BYDH	AX-158529411	Ds_PH	6B	51217509	0.06515	6.515	0.000210582	4.44e-05	p<10-3
Ds_SDW_W135_CAKO	Drought	Agro	SDW	W135_CAKO	AX-158530952	Ds_SDW	6D	303058769	0.06526	6.526	0.000333658	6.35e-05	p<10-3
Rf_HI_W135_CAVO	Rainfed	Agro	HI	W135_CAVO	AX-158531238	Rf_HI	6D	4520023	0.07358	7.358	0.00015914	2.12e-06	p<10-3
Rf_GPC_W135_CFCK	Rainfed	GQT	GPC	W135_CFCK	AX-158534120	Rf_GPC	5B	425540372	0.05795	5.795	0.000951305	1.06e-05	p<10-3
Ds_PBW_W135_CGPT	Drought	Agro	PBW	W135_CGPT	AX-158535143	Ds_PBW	6B	592461307	0.06001	6.001	0.000537162	4.02e-05	p<10-3
Ds_NDF_W135_CLRJ	Drought	GQT	NDF	W135_CLRJ	AX-158538565	Ds_NDF	3D	596913136	0.0632	6.32	0.000377661	2.75e-05	p<10-3
Year_Rel		BP	YR	W135_CLRO	AX-158538570	Year_Rel	3D	43790899	0.08135	8.135	NA	5.07657e-05	p<10-3
Ds_NDF_W135_CLSA	Drought	GQT	NDF	W135_CLSA	AX-158538582	Ds_NDF	3D	45069847	0.06106	6.106	0.000259032	4.23e-06	p<10-3
Ds_NDF_W135_CLSD	Drought	GQT	NDF	W135_CLSD	AX-158538585	Ds_NDF	3D	45237236	0.06106	6.106	0.000396422	2.96e-05	p<10-3
Ds_NDF_W135_CNDN	Drought	GQT	NDF	W135_CNDN	AX-158539557	Ds_NDF	7A	81500249	0.0605	6.05	0.00039859	3.38e-05	p<10-3
Ds_NDF_W135_CNDO	Drought	GQT	NDF	W135_CNDO	AX-158539558	Ds_NDF	7A	81103660	0.06344	6.344	0.00039859	3.6e-05	p<10-3
Rf_NDF_W135_CPHY	Rainfed	GQT	NDF	W135_CPHY	AX-158541024	Rf_NDF	2B	636113445	0.07096	7.096	0.000133699	4.23e-06	p<10-3
Rf_NDF_W135_CQTU	Rainfed	GQT	NDF	W135_CQTU	AX-158542008	Rf_NDF	3D	596916702	0.05873	5.873	0.000634986	2.96e-05	p<10-3
Ds_NDF_W135_CQTU	Drought	GQT	NDF	W135_CQTU	AX-158542008	Ds_NDF	3D	596916702	0.07227	7.227	0.000145553	2.12e-06	p<10-3
Ds_NDF_W135_CQUG	Drought	GQT	NDF	W135_CQUG	AX-158542020	Ds_NDF	3D	596916843	0.06636	6.636	0.000292394	1.48e-05	p<10-3
Ds_NDF_W135_CQVH	Drought	GQT	NDF	W135_CQVH	AX-158542047	Ds_NDF	3D	45805729	0.05877	5.877	0.000396422	3.17e-05	p<10-3
Ds_KNSp_W135_CRAI	Drought	Agro	KNSp	W135_CRAI	AX-158542178	Ds_KNSp	4A	3873047	0.0724	7.24	0.000111135	1.27e-05	p<10-3
Ds_HI_W135_CRAK	Drought	Agro	HI	W135_CRAK	AX-158542180	Ds_HI	4A	3364726	0.06741	6.741	0.000426149	8.46e-06	p<10-3
Year_Rel		BP	YR	W135_CRCA	AX-158542222	Year_Rel	4B	586467555	0.06544	6.544	NA	4.23048e-05	p<10-3
Ds_PBW_W135_CRZT	Drought	Agro	PBW	W135_CRZT	AX-158542839	Ds_PBW	5A	11066945	0.06951	6.951	0.000109401	6.35e-06	p<10-3
Year_Rel		BP	YR	W135_CSJA	AX-158543080	Year_Rel	5D	206103136	0.08351	8.351	NA	6.13419e-05	p<10-3
Rf_TKW_W135_CVDI	Rainfed	Agro	TKW	W135_CVDI	AX-158544960	Rf_TKW	1B	641534887	0.06368	6.368	0.0003457	2.54e-05	p<10-3
Ds_NDF_W135_CWEI	Drought	GQT	NDF	W135_CWEI	AX-158545662	Ds_NDF	1D	10153354	0.06251	6.251	0.000342313	2.12e-05	p<10-3
Ds_NDF_W135_CWEJ	Drought	GQT	NDF	W135_CWEJ	AX-158545663	Ds_NDF	1D	10170836	0.0665	6.65	0.000342313	2.33e-05	p<10-3
Ds_PH_W135_DASU	Drought	Agro	PH	W135_DASU	AX-158548742	Ds_PH	3B	562272668	0.06772	6.772	0.00024919	4.87e-05	p<10-3
Rf_KN_W135_DDGO	Rainfed	Agro	KN	W135_DDGO	AX-158550452	Rf_KN	4B	26797417	0.07297	7.297	0.00011099	4.23e-06	p<10-3
Ds_PBW_W135_DEIP	Drought	Agro	PBW	W135_DEIP	AX-158551181	Ds_PBW	5A	11062881	0.07475	7.475	0.000139712	8.46e-06	p<10-3
Ds_SDW_W135_DEIP	Drought	Agro	SDW	W135_DEIP	AX-158551181	Ds_SDW	5A	11062881	0.07255	7.255	0.00015456	5.08e-05	p<10-3
Ds_PH_W135_DESY	Drought	Agro	PH	W135_DESY	AX-158551450	Ds_PH	5B	559681918	0.06575	6.575	0.00036338	5.5e-05	p<10-3
Ds_GY_W135_DGVM	Drought	Agro	GY	W135_DGVM	AX-158552868	Ds_GY	6D	460734821	0.05851	5.851	0.000718528	2.54e-05	p<10-3
Ds_SDW_W135_DIMP	Drought	Agro	SDW	W135_DIMP	AX-158553989	Ds_SDW	7B	538878617	0.0611	6.11	0.000405322	7.4e-05	p<10-3
Rf_TKW_W135_DMKD	Rainfed	Agro	TKW	W135_DMKD	AX-158556629	Rf_TKW	1A	489150874	0.07012	7.012	0.000135772	8.46e-06	p<10-3
Ds_GY_W135_DNXS	Drought	Agro	GY	W135_DNXS	AX-158557658	Ds_GY	2B	28602351	0.06499	6.499	0.000881436	2.75e-05	p<10-3
Rf_NDF_W135_DOUN	Rainfed	GQT	NDF	W135_DOUN	AX-158558251	Rf_NDF	3D	596692726	0.06739	6.739	0.000204911	1.27e-05	p<10-3
Rf_NDF_W135_DOUO	Rainfed	GQT	NDF	W135_DOUO	AX-158558252	Rf_NDF	3D	596278584	0.06686	6.686	0.000209999	1.48e-05	p<10-3
Ds_NDF_W135_DOVL	Drought	GQT	NDF	W135_DOVL	AX-158558275	Ds_NDF	3D	45063653	0.06475	6.475	0.000259032	6.35e-06	p<10-3
Year_Rel		BP	YR	W135_DOVT	AX-158558283	Year_Rel	3D	43655074	0.08346	8.346	NA	4.65352e-05	p<10-3
Year_Rel		BP	YR	W135_DOVU	AX-158558284	Year_Rel	3D	43730415	0.07771	7.771	NA	7.82638e-05	p<10-3
Rf_SN_W135_DPBB	Rainfed	Agro	SN	W135_DPBB	AX-158558421	Rf_SN	4B	636790687	0.05764	5.764	0.000845145	1.69e-05	p<10-3
Rf_KN_W135_DRJD	Rainfed	Agro	KN	W135_DRJD	AX-158559983	Rf_KN	7B	693167336	0.0621	6.21	0.000358852	1.27e-05	p<10-3
Rf_TKW_W135_DSGF	Rainfed	Agro	TKW	W135_DSGF	AX-158560583	Rf_TKW	1A	489235617	0.0591	5.91	0.000738008	4.02e-05	p<10-3
Rf_KNSp_W135_DTNN	Rainfed	Agro	KNSp	W135_DTNN	AX-158561449	Rf_KNSp	1D	33855990	0.05854	5.854	0.000492456	6.35e-05	p<10-3
Rf_KNSp_W135_DTNO	Rainfed	Agro	KNSp	W135_DTNO	AX-158561450	Rf_KNSp	1D	33855774	0.06183	6.183	0.000414163	5.92e-05	p<10-3
Ds_SDW_W135_DUAV	Drought	Agro	SDW	W135_DUAV	AX-158561795	Ds_SDW	2A	758593804	0.06525	6.525	0.000391639	7.19e-05	p<10-3
Ds_PH_W135_DVLE	Drought	Agro	PH	W135_DVLE	AX-158562740	Ds_PH	3B	571766289	0.05713	5.713	0.000150223	3.6e-05	p<10-3
Ds_PH_W135_DWQF	Drought	Agro	PH	W135_DWQF	AX-158563547	Ds_PH	3B	562271973	0.07033	7.033	0.000385269	5.92e-05	p<10-3
Ds_NDF_W135_DXFP	Drought	GQT	NDF	W135_DXFP	AX-158563947	Ds_NDF	3D	45803220	0.06475	6.475	0.000259032	8.46e-06	p<10-3
Year_Rel		BP	YR	W135_DXTW	AX-158564318	Year_Rel	4B	587462033	0.07511	7.511	NA	3.5959e-05	p<10-3
Rf_PBW_W135_EAAO	Rainfed	Agro	PBW	W135_EAAO	AX-158565844	Rf_PBW	5D	529854459	0.06068	6.068	0.00026837	4.23e-06	p<10-3
Rf_SDW_W135_EAAO	Rainfed	Agro	SDW	W135_EAAO	AX-158565844	Rf_SDW	5D	529854459	0.06768	6.768	0.000167842	1.06e-05	p<10-3
Rf_NDF_W135_EDFU	Rainfed	GQT	NDF	W135_EDFU	AX-158568008	Rf_NDF	7B	183818061	0.05921	5.921	0.000622297	2.75e-05	p<10-3
Rf_HI_W135_EFKE	Rainfed	Agro	HI	W135_EFKE	AX-158569474	Rf_HI	1A	113696123	0.06179	6.179	0.000965103	5.71e-05	p<10-3
Rf_HI_W135_EFKZ	Rainfed	Agro	HI	W135_EFKZ	AX-158569495	Rf_HI	1A	202090057	0.06179	6.179	0.000610474	3.38e-05	p<10-3
Rf_SN_W135_EFOF	Rainfed	Agro	SN	W135_EFOF	AX-158569579	Rf_SN	1A	25922523	0.06519	6.519	0.000352422	2.12e-06	p<10-3
Ds_PBW_W135_EFUG	Drought	Agro	PBW	W135_EFUG	AX-158569736	Ds_PBW	1B	642637018	0.06122	6.122	0.00037733	2.96e-05	p<10-3
Ds_NDF_W135_EGPJ	Drought	GQT	NDF	W135_EGPJ	AX-158570285	Ds_NDF	1B	643178997	0.06374	6.374	0.000288524	1.06e-05	p<10-3
Ds_PBW_W135_EGPP	Drought	Agro	PBW	W135_EGPP	AX-158570291	Ds_PBW	1B	642639801	0.06382	6.382	0.000340985	2.12e-05	p<10-3
Rf_NDF_W135_EHPT	Rainfed	GQT	NDF	W135_EHPT	AX-158570971	Rf_NDF	1B	47162860	0.06703	6.703	0.000292795	1.9e-05	p<10-3
Rf_KNSp_W135_EJAK	Rainfed	Agro	KNSp	W135_EJAK	AX-158571924	Rf_KNSp	1D	33840375	0.06271	6.271	0.00032735	5.08e-05	p<10-3
Rf_NDF_W135_ENXO	Rainfed	GQT	NDF	W135_ENXO	AX-158575230	Rf_NDF	2B	66589553	0.06112	6.112	0.00041473	2.12e-05	p<10-3
Rf_GSC_W135_EQCZ	Rainfed	GQT	GSC	W135_EQCZ	AX-158576723	Rf_GSC	3A	497709896	0.06774	6.774	0.000122642	4.23e-06	p<10-3
Year_Rel		BP	YR	W135_EQCZ	AX-158576723	Year_Rel	3A	497709896	0.0586	5.86	NA	6.55724e-05	p<10-3
Rf_GSC_W135_EQDB	Rainfed	GQT	GSC	W135_EQDB	AX-158576725	Rf_GSC	3A	496990891	0.0657	6.57	0.000153962	1.69e-05	p<10-3
Year_Rel		BP	YR	W135_EQDB	AX-158576725	Year_Rel	3A	496990891	0.06003	6.003	NA	5.92267e-05	p<10-3
Year_Rel		BP	YR	W135_EQEO	AX-158576764	Year_Rel	3A	500988481	0.05884	5.884	NA	6.76876e-05	p<10-3
Rf_GSC_W135_EQEO	Rainfed	GQT	GSC	W135_EQEO	AX-158576764	Rf_GSC	3A	500988481	0.06708	6.708	0.000143051	1.48e-05	p<10-3
Rf_GSC_W135_EQOK	Rainfed	GQT	GSC	W135_EQOK	AX-158577020	Rf_GSC	3A	378815031	0.05649	5.649	0.000647855	2.75e-05	p<10-3
Ds_KN_W135_ESGH	Drought	Agro	KN	W135_ESGH	AX-158578161	Ds_KN	3B	786135790	0.06411	6.411	0.000330935	1.06e-05	p<10-3
Rf_NDF_W135_ETUN	Rainfed	GQT	NDF	W135_ETUN	AX-158579207	Rf_NDF	3B	542690928	0.06129	6.129	0.000525095	2.33e-05	p<10-3
Ds_SN_W135_EUDD	Drought	Agro	SN	W135_EUDD	AX-158579431	Ds_SN	3B	22698999	0.06531	6.531	0.000271397	8.46e-06	p<10-3
Ds_NDF_W135_EVOE	Drought	GQT	NDF	W135_EVOE	AX-158580394	Ds_NDF	3D	596891011	0.06451	6.451	0.000376466	2.54e-05	p<10-3
Year_Rel		BP	YR	W135_EVYS	AX-158580668	Year_Rel	3D	43729606	0.08261	8.261	NA	4.86505e-05	p<10-3
Rf_KNSp_W135_EWVK	Rainfed	Agro	KNSp	W135_EWVK	AX-158581258	Rf_KNSp	4A	703220630	0.06107	6.107	0.000330272	5.29e-05	p<10-3
Rf_NDF_W135_EXIH	Rainfed	GQT	NDF	W135_EXIH	AX-158581593	Rf_NDF	4A	594659453	0.06789	6.789	0.00018531	1.06e-05	p<10-3
Rf_KNSp_W135_EYJX	Rainfed	Agro	KNSp	W135_EYJX	AX-158582311	Rf_KNSp	4B	665934275	0.06366	6.366	0.000346676	5.5e-05	p<10-3
Year_Rel		BP	YR	W135_EYPF	AX-158582449	Year_Rel	4B	587155376	0.07228	7.228	NA	3.38438e-05	p<10-3
Ds_KN_W135_EYWD	Drought	Agro	KN	W135_EYWD	AX-158582629	Ds_KN	4B	483507506	0.05733	5.733	0.000807392	1.48e-05	p<10-3
Rf_SN_W135_EYXU	Rainfed	Agro	SN	W135_EYXU	AX-158582672	Rf_SN	4B	644328780	0.05928	5.928	0.00062081	1.27e-05	p<10-3
Rf_HI_W135_FASM	Rainfed	Agro	HI	W135_FASM	AX-158583886	Rf_HI	6D	4271656	0.06119	6.119	0.000430935	1.27e-05	p<10-3
Ds_PH_W135_FDZT	Drought	Agro	PH	W135_FDZT	AX-158586103	Ds_PH	5B	560440615	0.05997	5.997	0.000904931	7.61e-05	p<10-3
Rf_SDW_W135_FFPI	Rainfed	Agro	SDW	W135_FFPI	AX-158587184	Rf_SDW	5D	526424901	0.06664	6.664	0.000136072	8.46e-06	p<10-3
Rf_PBW_W135_FFPI	Rainfed	Agro	PBW	W135_FFPI	AX-158587184	Rf_PBW	5D	526424901	0.06595	6.595	0.000344773	6.35e-06	p<10-3
Rf_KN_W135_FFSF	Rainfed	Agro	KN	W135_FFSF	AX-158587259	Rf_KN	5D	410591860	0.07794	7.794	0.000124254	6.35e-06	p<10-3
Ds_GSC_W135_FFXU	Drought	GQT	GSC	W135_FFXU	AX-158587404	Ds_GSC	5D	542013739	0.06723	6.723	0.000144802	1.48e-05	p<10-3
Ds_GSC_W135_FFYI	Drought	GQT	GSC	W135_FFYI	AX-158587418	Ds_GSC	5D	540343445	0.06764	6.764	0.000100673	1.27e-05	p<10-3
Year_Rel		BP	YR	W135_FGCN	AX-158587527	Year_Rel	5D	104027565	0.06685	6.685	NA	5.2881e-05	p<10-3
Rf_HI_W135_FGTR	Rainfed	Agro	HI	W135_FGTR	AX-158587973	Rf_HI	6A	579820791	0.05676	5.676	0.000624487	4.65e-05	p<10-3
Rf_TKW_W135_FHDA	Rainfed	Agro	TKW	W135_FHDA	AX-158588216	Rf_TKW	6A	100804152	0.07176	7.176	0.000533223	2.96e-05	p<10-3
Rf_TKW_W135_FHDE	Rainfed	Agro	TKW	W135_FHDE	AX-158588220	Rf_TKW	6A	100303415	0.06027	6.027	0.00036533	2.75e-05	p<10-3
Rf_TKW_W135_FHDI	Rainfed	Agro	TKW	W135_FHDI	AX-158588224	Rf_TKW	6A	100247509	0.05945	5.945	0.000874149	4.23e-05	p<10-3
Rf_TKW_W135_FHDO	Rainfed	Agro	TKW	W135_FHDO	AX-158588230	Rf_TKW	6A	101318440	0.06412	6.412	0.000237834	1.9e-05	p<10-3
Rf_TKW_W135_FHDX	Rainfed	Agro	TKW	W135_FHDX	AX-158588239	Rf_TKW	6A	100752956	0.06412	6.412	0.000237834	2.12e-05	p<10-3
Year_Rel		BP	YR	W135_FMDM	AX-158591608	Year_Rel	7A	24927584	0.06581	6.581	NA	5.49962e-05	p<10-3
Year_Rel		BP	YR	W135_FOPK	AX-158593270	Year_Rel	7B	59648555	0.07915	7.915	NA	0.000109992	p<10-3
Rf_TKW_W135_FSDB	Rainfed	Agro	TKW	W135_FSDB	AX-158595653	Rf_TKW	1B	641532096	0.0612	6.12	0.000341284	2.33e-05	p<10-3
Rf_GY_W135_FUDN	Rainfed	Agro	GY	W135_FUDN	AX-158597017	Rf_GY	2B	568030814	0.06443	6.443	0.000289435	4.23e-06	p<10-3
Rf_NDF_W135_FUHL	Rainfed	GQT	NDF	W135_FUHL	AX-158597119	Rf_NDF	2B	636209445	0.06578	6.578	0.000148511	6.35e-06	p<10-3
Ds_PBW_W135_FVHQ	Drought	Agro	PBW	W135_FVHQ	AX-158597800	Ds_PBW	2D	22200782	0.05935	5.935	0.000527394	3.38e-05	p<10-3
Ds_KNSp_W135_FYID	Drought	Agro	KNSp	W135_FYID	AX-158599841	Ds_KNSp	5B	21155441	0.06348	6.348	0.000344146	1.48e-05	p<10-3
Ds_KNSp_W135_FYIE	Drought	Agro	KNSp	W135_FYIE	AX-158599842	Ds_KNSp	5B	20835066	0.06421	6.421	0.000392859	1.9e-05	p<10-3
Rf_KN_W135_FYPS	Rainfed	Agro	KN	W135_FYPS	AX-158600038	Rf_KN	5D	399158940	0.05863	5.863	0.000830782	3.17e-05	p<10-3
Rf_KN_W135_GAQT	Rainfed	Agro	KN	W135_GAQT	AX-158601417	Rf_KN	7B	657868085	0.06904	6.904	0.00024401	1.06e-05	p<10-3
Rf_HI_W135_GHJR	Rainfed	Agro	HI	W135_GHJR	AX-158605965	Rf_HI	1A	137871775	0.06179	6.179	0.000440851	1.48e-05	p<10-3
Rf_HI_W135_GHJZ	Rainfed	Agro	HI	W135_GHJZ	AX-158605973	Rf_HI	1A	113695773	0.06179	6.179	0.000610474	3.6e-05	p<10-3
Rf_HI_W135_GHKH	Rainfed	Agro	HI	W135_GHKH	AX-158605981	Rf_HI	1A	169297402	0.06179	6.179	0.000610474	3.81e-05	p<10-3
Rf_HI_W135_GHKO	Rainfed	Agro	HI	W135_GHKO	AX-158605988	Rf_HI	1A	147345020	0.0566	5.66	0.000965103	5.92e-05	p<10-3
Rf_HI_W135_GHLB	Rainfed	Agro	HI	W135_GHLB	AX-158606001	Rf_HI	1A	186721565	0.0633	6.33	0.000440851	1.69e-05	p<10-3
Rf_GSC_W135_GQWE	Rainfed	GQT	GSC	W135_GQWE	AX-158612374	Rf_GSC	3A	502397511	0.06653	6.653	0.000123801	8.46e-06	p<10-3
Ds_KN_W135_GSKV	Drought	Agro	KN	W135_GSKV	AX-158613431	Ds_KN	3B	786775904	0.06469	6.469	0.000420208	1.27e-05	p<10-3
Ds_KN_W135_GSLB	Drought	Agro	KN	W135_GSLB	AX-158613437	Ds_KN	3B	786480441	0.06512	6.512	0.000274583	6.35e-06	p<10-3
Ds_GY_W135_HOJU	Drought	Agro	GY	W135_HOJU	AX-89310598	Ds_GY	2B	418276688	0.06734	6.734	0.000454056	1.69e-05	p<10-3
Ds_PBW_W135_HOJU	Drought	Agro	PBW	W135_HOJU	AX-89310598	Ds_PBW	2B	418276688	0.06469	6.469	0.000348204	2.33e-05	p<10-3
Ds_NDF_W135_HOMC	Drought	GQT	NDF	W135_HOMC	AX-89335309	Ds_NDF	4B	665402304	0.06797	6.797	0.000288975	1.27e-05	p<10-3
Rf_KNSp_W135_HOMV	Rainfed	Agro	KNSp	W135_HOMV	AX-89341821	Rf_KNSp	7B	656199735	0.06823	6.823	0.00020874	4.65e-05	p<10-3
Ds_KNSp_W135_HONK	Drought	Agro	KNSp	W135_HONK	AX-89346665	Ds_KNSp	1A	516432599	0.05656	5.656	0.000772257	2.33e-05	p<10-3
Rf_KN_W135_HOWM	Rainfed	Agro	KN	W135_HOWM	AX-89455677	Rf_KN	4B	56986347	0.06163	6.163	0.000366831	1.69e-05	p<10-3
Rf_TKW_W135_HPGI	Rainfed	Agro	TKW	W135_HPGI	AX-89611858	Rf_TKW	3B	728900563	0.0659	6.59	0.000190484	1.06e-05	p<10-3
Ds_PBW_W135_HPLM	Drought	Agro	PBW	W135_HPLM	AX-89696920	Ds_PBW	2B	28601208	0.07986	7.986	0.000100929	4.23e-06	p<10-3
Rf_HI_W135_HSGO	Rainfed	Agro	HI	W135_HSGO	AX-94968843	Rf_HI	7A	31875912	0.06739	6.739	0.000257967	6.35e-06	p<10-3
Ds_SDW_W135_HTLQ	Drought	Agro	SDW	W135_HTLQ	AX-95631315	Ds_SDW	7B	539232675	0.0611	6.11	0.000405322	7.61e-05	p<10-3
Rf_TKW_W135_HTNI	Rainfed	Agro	TKW	W135_HTNI	AX-95631801	Rf_TKW	2A	639988472	0.05807	5.807	0.000654915	3.6e-05	p<10-3
Rf_HI_W135_HTOG	Rainfed	Agro	HI	W135_HTOG	AX-95631971	Rf_HI	1A	101763979	0.06323	6.323	0.000440851	1.9e-05	p<10-3
Ds_PH_W15_ADMQ	Drought	Agro	PH	W15_ADMQ	BobWhite_c27885_197	Ds_PH	5B	462127639	0.06391	6.391	0.000898107	7.4e-05	p<10-3
Rf_TKW_W15_ADYK	Rainfed	Agro	TKW	W15_ADYK	BobWhite_c96_170	Rf_TKW	1A	531682521	0.05933	5.933	0.000660925	3.81e-05	p<10-3
Ds_SDW_W15_ADZD	Drought	Agro	SDW	W15_ADZD	BobWhite_rep_c49587_1290	Ds_SDW	7B	488704491	0.06702	6.702	0.000218662	5.71e-05	p<10-3
Rf_PH_W15_AABA	Rainfed	Agro	PH	W15_AABA	BS00003522_51	Rf_PH	3B	432844990	0.05736	5.736	0.00062875	2.33e-05	p<10-3
Ds_GY_W15_AAFK	Drought	Agro	GY	W15_AAFK	BS00010993_51	Ds_GY	6B	662257830	0.07625	7.625	0.000100524	6.35e-06	p<10-3
Rf_NDF_W15_AAJV	Rainfed	GQT	NDF	W15_AAJV	BS00021919_51	Rf_NDF	3D	596916300	0.06381	6.381	0.000873185	3.17e-05	p<10-3
Ds_NDF_W15_AAJV	Drought	GQT	NDF	W15_AAJV	BS00021919_51	Ds_NDF	3D	596916300	0.0705	7.05	0.000306575	1.69e-05	p<10-3
Ds_GSC_W15_AAKR	Drought	GQT	GSC	W15_AAKR	BS00022036_51	Ds_GSC	5D	547273811	0.05462	5.462	0.000569882	3.17e-05	p<10-3
Ds_SDW_W15_ABPK	Drought	Agro	SDW	W15_ABPK	BS00064162_51	Ds_SDW	1B	601007240	0.05924	5.924	0.000557561	7.83e-05	p<10-3
Rf_HI_W15_ABTK	Rainfed	Agro	HI	W15_ABTK	BS00065700_51	Rf_HI	6A	579422006	0.05931	5.931	0.000446909	2.12e-05	p<10-3
Ds_NDF_W15_ABUH	Drought	GQT	NDF	W15_ABUH	BS00066015_51	Ds_NDF	7A	81003142	0.06438	6.438	0.000739747	5.29e-05	p<10-3
Ds_NDF_W15_ABYH	Drought	GQT	NDF	W15_ABYH	BS00067746_51	Ds_NDF	7A	81004232	0.06342	6.342	0.000479048	4.44e-05	p<10-3
Ds_SN_W15_ACGL	Drought	Agro	SN	W15_ACGL	BS00075731_51	Ds_SN	7A	731882556	0.05794	5.794	0.000650671	2.12e-05	p<10-3
Rf_HI_W15_ACIK	Rainfed	Agro	HI	W15_ACIK	BS00078400_51	Rf_HI	7A	31875912	0.07475	7.475	0.000200437	4.23e-06	p<10-3
Rf_KNSp_W15_ACIV	Rainfed	Agro	KNSp	W15_ACIV	BS00078785_51	Rf_KNSp	7B	654951760	0.06858	6.858	0.000442572	6.13e-05	p<10-3
Rf_KN_W15_ACUB	Rainfed	Agro	KN	W15_ACUB	BS00095826_51	Rf_KN	7A	3983420	0.06337	6.337	0.000384032	1.9e-05	p<10-3
Ds_NDF_W15_ADAP	Drought	GQT	NDF	W15_ADAP	BS00110010_51	Ds_NDF	7A	80861432	0.06085	6.085	0.000446889	3.81e-05	p<10-3
Rf_GSC_W15_ADAW	Rainfed	GQT	GSC	W15_ADAW	BS00110129_51	Rf_GSC	3A	266691282	0.06033	6.033	0.00050735	2.54e-05	p<10-3
Rf_PH_W15_AEGH	Rainfed	Agro	PH	W15_AEGH	CAP12_rep_c4520_207	Rf_PH	5B	487462532	0.0638	6.38	0.000192076	1.9e-05	p<10-3
Ds_GSC_W15_AEIZ	Drought	GQT	GSC	W15_AEIZ	CAP7_rep_c12715_390	Ds_GSC	5D	547273572	0.05462	5.462	0.000499081	2.96e-05	p<10-3
Ds_GSC_W15_AEJM	Drought	GQT	GSC	W15_AEJM	CAP8_c145_89	Ds_GSC	5D	547273518	0.05358	5.358	0.000381434	2.75e-05	p<10-3
Ds_GSC_W15_AEPI	Drought	GQT	GSC	W15_AEPI	D_contig79410_237	Ds_GSC	5D	542659973	0.06583	6.583	0.000192408	2.12e-05	p<10-3
Rf_NDF_W15_AEMK	Rainfed	GQT	NDF	W15_AEMK	D_GBF1XID01ETBRB_172	Rf_NDF	3D	596088741	0.08091	8.091	0.00016394	8.46e-06	p<10-3
Rf_NDF_W15_AEXB	Rainfed	GQT	NDF	W15_AEXB	Excalibur_c13336_670	Rf_NDF	3D	596915153	0.06425	6.425	0.000873947	3.38e-05	p<10-3
Ds_NDF_W15_AEXC	Drought	GQT	NDF	W15_AEXC	Excalibur_c13337_219	Ds_NDF	7A	81133455	0.0607	6.07	0.000455707	4.02e-05	p<10-3
Ds_SDW_W15_AEZC	Drought	Agro	SDW	W15_AEZC	Excalibur_c16687_476	Ds_SDW	7B	488410704	0.06465	6.465	0.000314396	5.92e-05	p<10-3
Ds_SDW_W15_AFCO	Drought	Agro	SDW	W15_AFCO	Excalibur_c21372_142	Ds_SDW	3B	66954023	0.06234	6.234	0.000390101	6.77e-05	p<10-3
Ds_GPC_W15_AFEP	Drought	GQT	GPC	W15_AFEP	Excalibur_c24391_321	Ds_GPC	3B	31105305	0.04903	4.903	0.00084199	2.12e-06	p<10-3
Ds_SN_W15_AFJV	Drought	Agro	SN	W15_AFJV	Excalibur_c3270_1566	Ds_SN	1B	24161324	0.05932	5.932	0.000529439	1.9e-05	p<10-3
Ds_TKW_W15_AFKZ	Drought	Agro	TKW	W15_AFKZ	Excalibur_c34964_326	Ds_TKW	2A	677486325	0.05996	5.996	0.000700712	4.23e-06	p<10-3
Rf_HI_W15_AFPF	Rainfed	Agro	HI	W15_AFPF	Excalibur_c4325_1150	Rf_HI	4A	684616499	0.05716	5.716	0.000905229	4.87e-05	p<10-3
Rf_KN_W15_AFZE	Rainfed	Agro	KN	W15_AFZE	Excalibur_c662_229	Rf_KN	7A	2718661	0.0643	6.43	0.000700861	2.96e-05	p<10-3
Ds_GSC_W15_AGEU	Drought	GQT	GSC	W15_AGEU	Excalibur_c91745_337	Ds_GSC	5D	541945313	0.06583	6.583	0.000192408	2.33e-05	p<10-3
Ds_GSC_W15_AGIK	Drought	GQT	GSC	W15_AGIK	Excalibur_rep_c104791_725	Ds_GSC	5D	548367544	0.05215	5.215	0.000840925	3.81e-05	p<10-3
Rf_GY_W15_AGXG	Rainfed	Agro	GY	W15_AGXG	GENE_3500_336	Rf_GY	5A	117495535	0.08167	8.167	0.000142841	2.12e-06	p<10-3
Ds_GY_W15_AHAF	Drought	Agro	GY	W15_AHAF	GENE_4375_382	Ds_GY	7A	79781013	0.06717	6.717	0.000433882	1.48e-05	p<10-3
Year_Rel		BP	YR	W15_AIGM	Ku_c14982_168	Year_Rel	3A	497649774	0.0586	5.86	NA	6.34571e-05	p<10-3
Rf_GSC_W15_AIGM	Rainfed	GQT	GSC	W15_AIGM	Ku_c14982_168	Rf_GSC	3A	497649774	0.06774	6.774	0.000122642	6.35e-06	p<10-3
Ds_NDF_W15_AIKV	Drought	GQT	NDF	W15_AIKV	Ku_c554_1239	Ds_NDF	7A	81135546	0.06226	6.226	0.000455707	4.23e-05	p<10-3
Year_Rel		BP	YR	W15_AIPY	Kukri_c13045_302	Year_Rel	5D	241250896	0.07144	7.144	NA	4.442e-05	p<10-3
Rf_NDF_W15_AIVH	Rainfed	GQT	NDF	W15_AIVH	Kukri_c2289_635	Rf_NDF	3D	596718200	0.06431	6.431	0.000539873	2.54e-05	p<10-3
Ds_SDW_W15_AJLI	Drought	Agro	SDW	W15_AJLI	Kukri_c48870_115	Ds_SDW	7B	488410865	0.06465	6.465	0.000314396	6.13e-05	p<10-3
Ds_PBW_W15_AJPN	Drought	Agro	PBW	W15_AJPN	Kukri_c57014_168	Ds_PBW	2B	734127065	0.0636	6.36	0.000499264	3.17e-05	p<10-3
Ds_NDF_W15_AJPT	Drought	GQT	NDF	W15_AJPT	Kukri_c57674_324	Ds_NDF	7A	81133922	0.06147	6.147	0.000881004	5.5e-05	p<10-3
Rf_TKW_W15_AJUX	Rainfed	Agro	TKW	W15_AJUX	Kukri_c77911_260	Rf_TKW	6A	100238738	0.07356	7.356	0.000107008	4.23e-06	p<10-3
Ds_NDF_W15_AJVV	Drought	GQT	NDF	W15_AJVV	Kukri_c8211_159	Ds_NDF	1D	9875153	0.06333	6.333	0.000310282	1.9e-05	p<10-3
Ds_NDF_W15_ANGH	Drought	GQT	NDF	W15_ANGH	Ra_c8937_191	Ds_NDF	7A	81498352	0.06081	6.081	0.000572265	4.87e-05	p<10-3
Rf_KN_W15_ALKG	Rainfed	Agro	KN	W15_ALKG	RAC875_c42866_1323	Rf_KN	7A	2829287	0.06699	6.699	0.000691745	2.75e-05	p<10-3
Ds_SDW_W15_ALOI	Drought	Agro	SDW	W15_ALOI	RAC875_c50422_299	Ds_SDW	2B	733643329	0.05999	5.999	0.000383861	6.56e-05	p<10-3
Ds_GY_W15_ALOT	Drought	Agro	GY	W15_ALOT	RAC875_c5129_280	Ds_GY	6B	663676344	0.06024	6.024	0.000574018	1.9e-05	p<10-3
Ds_PBW_W15_ALYA	Drought	Agro	PBW	W15_ALYA	RAC875_c75528_355	Ds_PBW	7A	79648907	0.06567	6.567	0.000374343	2.75e-05	p<10-3
Ds_NDF_W15_AMPN	Drought	GQT	NDF	W15_AMPN	RFL_Contig1823_1044	Ds_NDF	1B	645708159	0.05898	5.898	0.000612564	5.08e-05	p<10-3
Ds_SN_W15_AMRG	Drought	Agro	SN	W15_AMRG	RFL_Contig2814_604	Ds_SN	7A	731272684	0.06391	6.391	0.000357848	1.48e-05	p<10-3
Rf_HI_W15_ANRI	Rainfed	Agro	HI	W15_ANRI	TA006289_1238	Rf_HI	3B	782112850	0.05906	5.906	0.000482276	2.33e-05	p<10-3
Ds_NDF_W15_ANXY	Drought	GQT	NDF	W15_ANXY	Tdurum_contig11216_942	Ds_NDF	1B	645572033	0.05942	5.942	0.000561209	4.65e-05	p<10-3
Ds_PH_W15_ANZT	Drought	Agro	PH	W15_ANZT	Tdurum_contig12967_831	Ds_PH	5A	450555721	0.05843	5.843	0.00080414	6.77e-05	p<10-3
Ds_PBW_W15_AOOZ	Drought	Agro	PBW	W15_AOOZ	Tdurum_contig47269_904	Ds_PBW	6B	593263246	0.071	7.1	0.000537162	4.23e-05	p<10-3
Ds_SDW_W15_AOSZ	Drought	Agro	SDW	W15_AOSZ	Tdurum_contig51993_52	Ds_SDW	3B	66953509	0.06234	6.234	0.000390101	6.98e-05	p<10-3
Ds_PH_W15_AOWW	Drought	Agro	PH	W15_AOWW	Tdurum_contig58669_273	Ds_PH	5B	562049149	0.06759	6.759	0.000344639	5.29e-05	p<10-3
Ds_SDW_W15_APGJ	Drought	Agro	SDW	W15_APGJ	Tdurum_contig91519_224	Ds_SDW	2B	407235217	0.06699	6.699	0.000218211	5.5e-05	p<10-3
Ds_PH_W15_APKJ	Drought	Agro	PH	W15_APKJ	tplb0027f13_1493	Ds_PH	5B	546827787	0.07089	7.089	0.000237475	4.65e-05	p<10-3
Ds_PBW_W15_APLW	Drought	Agro	PBW	W15_APLW	tplb0036i05_182	Ds_PBW	3A	714951061	0.06066	6.066	0.000660623	4.44e-05	p<10-3
Ds_GSC_W15_APWF	Drought	GQT	GSC	W15_APWF	wsnp_CAP11_c209_198671	Ds_GSC	5D	547273811	0.05462	5.462	0.000569882	3.38e-05	p<10-3
Rf_SDW_W15_APWJ	Rainfed	Agro	SDW	W15_APWJ	wsnp_CAP11_c2438_1258747	Rf_SDW	3A	471358821	0.06375	6.375	0.0001251	6.35e-06	p<10-3
Ds_GY_W15_AQEM	Drought	Agro	GY	W15_AQEM	wsnp_Ex_c11714_18840676	Ds_GY	6B	599061870	0.06855	6.855	0.000199247	1.06e-05	p<10-3
Ds_PBW_W15_AQEM	Drought	Agro	PBW	W15_AQEM	wsnp_Ex_c11714_18840676	Ds_PBW	6B	599061870	0.071	7.1	0.000149472	1.06e-05	p<10-3
Ds_SN_W15_AQTH	Drought	Agro	SN	W15_AQTH	wsnp_Ex_c2360_4422599	Ds_SN	7A	127767438	0.0681	6.81	0.000284047	1.06e-05	p<10-3
Rf_TKW_W15_ARDM	Rainfed	Agro	TKW	W15_ARDM	wsnp_Ex_c40019_47166980	Rf_TKW	5A	611562283	0.06363	6.363	0.000603458	3.17e-05	p<10-3
Ds_SN_W15_ARLR	Drought	Agro	SN	W15_ARLR	wsnp_Ex_c57450_59156677	Ds_SN	3B	24944179	0.06703	6.703	0.000193392	6.35e-06	p<10-3
Ds_KN_W15_ARNH	Drought	Agro	KN	W15_ARNH	wsnp_Ex_c6320_11003591	Ds_KN	4A	41952345	0.07179	7.179	0.000135644	2.12e-06	p<10-3
Rf_KN_W15_AROK	Rainfed	Agro	KN	W15_AROK	wsnp_Ex_c662_1301994	Rf_KN	7A	2717893	0.05954	5.954	0.000982178	3.38e-05	p<10-3
Ds_GSC_W15_ARPB	Drought	GQT	GSC	W15_ARPB	wsnp_Ex_c7003_12065828	Ds_GSC	2B	210259511	0.05523	5.523	0.000965214	4.23e-05	p<10-3
Rf_KNSp_W15_ARUT	Rainfed	Agro	KNSp	W15_ARUT	wsnp_Ex_rep_c101994_87256479	Rf_KNSp	5A	593331362	0.06115	6.115	0.000288606	4.87e-05	p<10-3
Ds_TKW_W15_ARWT	Drought	Agro	TKW	W15_ARWT	wsnp_Ex_rep_c113621_94394656	Ds_TKW	5A	422075615	0.05994	5.994	0.000852979	6.35e-06	p<10-3
Rf_SDW_W15_ASIQ	Rainfed	Agro	SDW	W15_ASIQ	wsnp_JD_rep_c64325_41024646	Rf_SDW	3A	466111373	0.06375	6.375	0.000106059	4.23e-06	p<10-3
Ds_GSC_W15_ASPA	Drought	GQT	GSC	W15_ASPA	wsnp_Ku_c3022_5674299	Ds_GSC	5D	548024637	0.06082	6.082	0.000220437	2.54e-05	p<10-3
Rf_GSC_W15_ASQX	Rainfed	GQT	GSC	W15_ASQX	wsnp_Ku_c3956_7237707	Rf_GSC	3A	502402842	0.05888	5.888	0.000131768	1.06e-05	p<10-3
Ds_GSC_W15_ASSU	Drought	GQT	GSC	W15_ASSU	wsnp_Ku_c5228_9318604	Ds_GSC	5D	548367544	0.05215	5.215	0.000840925	4.02e-05	p<10-3
Ds_KN_W15_ASVK	Drought	Agro	KN	W15_ASVK	wsnp_Ku_rep_c102135_89174746	Ds_KN	3B	630004494	0.06009	6.009	0.000214522	4.23e-06	p<10-3

## Sheet: Table Sxl2
					Traits
Treatment	Marker_code	MarkerName	Chr	Pos	GSC	GY	HI	KNSp	PBW	PH	SDW	SNms	TKW	Grand Total
Rainfed	W135_ACEE	AX-108824428	4B	14343341						1				1
Rainfed	W135_ADVC	AX-108905462	5A	586152838				1						1
Rainfed	W135_AFBF	AX-108978632	5A	588023218				1						1
Rainfed	W135_AJWO	AX-109506123	5D	528818863					1		1			2
Rainfed	W135_ALDH	AX-109855651	4A	594530554				1						1
Rainfed	W135_AQGS	AX-110400483	4B	14654168						1				1
Rainfed	W135_ARBW	AX-110437108	7B	657869278				1						1
Rainfed	W135_AUZL	AX-110921889	5A	588551159				1						1
Rainfed	W135_AZDG	AX-111124268	5A	588846051				1						1
Rainfed	W135_AZWM	AX-111449506	5A	588854613				1						1
Rainfed	W135_BASV	AX-111486916	5B	587071133						1				1
Rainfed	W135_COMQ	AX-158540470	1D	33470449				1						1
Rainfed	W135_EXIH	AX-158581593	4A	594659453				1						1
Rainfed	W135_FXMA	AX-158599266	5A	589296327				1						1
Rainfed	W135_GAQT	AX-158601417	7B	657868085				1						1
Rainfed	W135_HAHZ	AX-158618765	4B	14396083						1				1
Rainfed	W135_HAIA	AX-158618766	4B	15268438						1				1
Rainfed	W135_HOMY	AX-89343036	6A	16229407				1						1
Rainfed	W15_AAVA	BS00027054_51	7B	654950222				1						1
Rainfed	W15_ABBH	BS00039118_51	7B	656929260				1						1
Rainfed	W15_ABPJ	BS00064146_51	7B	655818427				1						1
Rainfed	W15_ACWV	BS00101408_51	7B	657662537				1						1
Rainfed	W15_AGXR	GENE_3659_104	6A	101302690									1	1
Rainfed	W15_AJSU	Kukri_c6669_145	5A	588872163				1						1
Drought	W135_AAVC	AX-108762506	1D	8606804						1				1
Drought	W135_ACNW	AX-108843940	7B	488411894							1			1
Drought	W135_AFHU	AX-109274463	7A	79654271		1								1
Drought	W135_AFMS	AX-109283472	7B	518389026							1			1
Drought	W135_AGKP	AX-109328820	7B	573023414							1			1
Drought	W135_AIDF	AX-109411217	7B	506562643							1			1
Drought	W135_ANMF	AX-109972627	7B	506627270							1			1
Drought	W135_AROT	AX-110459436	7B	505451721							1			1
Drought	W135_ASTQ	AX-110518414	5D	542108342	1									1
Drought	W135_ATUW	AX-110575183	7B	572649824							1			1
Drought	W135_AVQF	AX-110949736	7B	506373000							1			1
Drought	W135_BCLB	AX-111561744	2D	23416219					1					1
Drought	W135_CHNF	AX-158535753	6B	51225191						1				1
Drought	W135_CRAK	AX-158542180	4A	3364726				1						1
Drought	W135_CRZT	AX-158542839	5A	11066945							1			1
Drought	W135_CUXI	AX-158544804	1B	622572028				1						1
Drought	W135_CWHQ	AX-158545748	1D	8226969						1				1
Drought	W135_DIKJ	AX-158553931	7B	518383397							1			1
Drought	W135_FEPU	AX-158586520	5D	546839205	1									1
Drought	W135_FNIZ	AX-158592427	7B	572654422							1			1
Drought	W135_FUPW	AX-158597338	2B	69043294			1							1
Drought	W135_FVHQ	AX-158597800	2D	22200782							1			1
Drought	W135_HNTK	AX-86171904	1D	8606637						1				1
Drought	W135_HOJU	AX-89310598	2B	418276688							1			1
Drought	W135_HRNH	AX-94705176	7B	518386661							1			1
Drought	W15_AACC	BS00004466_51	6A	599035194								1		1
Drought	W15_AAZD	BS00035307_51	4A	3381284				1						1
Drought	W15_ACEB	BS00073116_51	5D	546864069	1									1
Drought	W15_ACXW	BS00105054_51	5B	558625399						1				1
Drought	W15_ACYP	BS00106545_51	4A	3445106				1						1
Drought	W15_ADHO	BobWhite_c1715_887	1D	8185547						1				1
Drought	W15_AEAU	BobWhite_rep_c63008_468	7B	506561102							1			1
Drought	W15_AEFY	CAP12_c606_221	7B	520418470							1			1
Drought	W15_AEGH	CAP12_rep_c4520_207	5B	487462532						1				1
Drought	W15_AFHL	Excalibur_c28592_173	5D	546910383	1									1
Drought	W15_AFLT	Excalibur_c36408_381	7B	508659416							1			1
Drought	W15_AFOO	Excalibur_c42190_383	5D	546906350	1									1
Drought	W15_AFUH	Excalibur_c5329_1335	5B	580686304						1				1
Drought	W15_AIFL	Ku_c11150_773	5B	487831488						1				1
Drought	W15_ALAW	RAC875_c2887_52	7B	518386568							1			1
Drought	W15_ALXV	RAC875_c7474_1661	7B	505939784							1			1
Drought	W15_ALYA	RAC875_c75528_355	7A	79648907		1								1
Drought	W15_ANKY	TA002756_0960	5B	558342508						1				1
Drought	W15_AOLP	Tdurum_contig43589_340	7B	505939784							1			1
Drought	W15_AOLQ	Tdurum_contig43589_825	7B	505938969							1			1
Drought	W15_APCA	Tdurum_contig75700_411	6A	598635440								1		1
Drought	W15_APQG	wsnp_BE443010B_Ta_2_1	7B	518919139							1			1
Drought	W15_AQCL	wsnp_Ex_c1085_2078944	1D	8185547						1				1
Drought	W15_AQHG	wsnp_Ex_c1358_2600929	1D	8605331						1				1
Drought	W15_AQHH	wsnp_Ex_c1358_2602235	1D	8606637						1				1
Drought	W15_AREA	wsnp_Ex_c41048_47969948	1D	216862						1				1
Drought	W15_ARGY	wsnp_Ex_c4804_8579139	7B	518386294							1			1
Drought	W15_ASHA	wsnp_JD_c64_103934	4A	3445091				1						1
Grand Total					5	2	1	22	2	19	24	2	1	78

## Sheet: Table Sxl3
Genome or chromosome	Number of mapped SNP	Last SNP position (BP)	First SNP position (BP)	Interval (Bp)	SNP density	Number of pairwise tests	Chromosomal LD (r2 = 0.10; in Mbp)
A-genome	9965	780718366	10488	780707878	78345	1318595	19
B-genome	11887	829293446	80171	829213275	69758	1696897	38
D-genome	2364	650327136	209439	650117697	275007	119004	17.5
1A	1470	593552345	1166265	592386080	402984	196237	32
2A	1545	780718366	259237	780459129	505152	213174	75
3A	1355	749404693	80115	749324578	553007	163406	17.5
4A	776	744311864	2791017	741520847	955568	57326	10.5
5A	1761	708850177	10488	708839689	402521	282316	11.5
6A	1326	617689702	287397	617402305	465613	140576	37
7A	1732	736691630	316670	736374960	425159	265560	13
1B	1737	688283156	1200454	687082702	395557	248179	100
2B	1719	801253554	80838	801172716	466069	237440	25
3B	1991	829293446	983870	828309576	416027	318833	31
4B	1192	670438432	236529	670201903	562250	124899	100
5B	2131	713016195	80171	712936024	334555	360795	20
6B	1848	720984422	164632	720819790	390054	269177	100
7B	1269	750605798	429714	750176084	591155	137574	21
1D	512	495112468	209439	494903029	966607	28428	23
2D	603	650327136	8376176	641950960	1.0646e+06	31692	33
3D	221	614367160	773159	613594001	2.77644e+06	8868	11
4D	104	509481054	1243612	508237442	4.8869e+06	6817	17
5D	344	562834171	43410011	519424160	1.50995e+06	17696	12.5
6D	319	472790074	1415302	471374772	1.47766e+06	14241	7.5
7D	261	637701723	4005296	633696427	2.42796e+06	11262	7.5
Entire genome	24216	829293446	10488	829282958	34245.2	3134496	28.5

## Sheet: Table Sxl4
Treatment	Traits	Chr	MarkerPic	Boundary Max	Boundary Min	Cluster Intervall (Mbp)	MTAs number in cluster
Drought	SDW	7B	7B_Ds_SDW,W135_AIDF,AX-109411217	520418470	488411894	32.0066	17
Drought	PH	1D	1D_Ds_PH,W135_HNTK,AX-86171904	8606804	216862	8.38994	8
Drought	GSC	5D	5D_Ds_GSC,W15_ACEB,BS00073116_51	546910383	542108342	4.80204	5
Drought	KNSp	4A	4A_Ds_KNSp,W135_CRAK,AX-158542180	3445106	3364726	0.08038	4
Drought	PH	5B	5B_Ds_PH,W15_ACXW,BS00105054_51	580686304	558342508	22.3438	3
Drought	SDW	7B	7B_Ds_SDW,W135_AGKP,AX-109328820	573023414	572649824	0.37359	3
Drought	GY	7A	7A_Ds_GY,W15_ALYA,RAC875_c75528_355	79654271	79648907	0.005364	2
Drought	PH	5B	5B_Ds_PH,W15_AEGH,CAP12_rep_c4520_207	487831488	487462532	0.368956	2
Drought	SN	6A	6A_Ds_SN,W15_AACC,BS00004466_51	599035194	598635440	0.399754	2
Drought	HI	2B	2B_Ds_HI,W135_FUPW,AX-158597338	69043294	69043294	0	1
Drought	KNSp	1B	1B_Ds_KNSp,W135_CUXI,AX-158544804	622572028	622572028	0	1
Drought	PBW	2D	2D_Ds_PBW,W135_BCLB,AX-111561744	23416219	23416219	0	1
Drought	PH	6B	6B_Ds_PH,W135_CHNF,AX-158535753	51225191	51225191	0	1
Drought	SDW	2B	2B_Ds_SDW,W135_HOJU,AX-89310598	418276688	418276688	0	1
Drought	SDW	2D	2D_Ds_SDW_W135_FVHQ,AX-158597800	22200782	22200782	0	1
Drought	SDW	5A	5A_Ds_SDW,W135_CRZT,AX-158542839	11066945	11066945	0	1
Rainfed	KNSp	5A	5A_Rf_KNSp,W135_ADVC,AX-108905462	589296327	586152838	3.14349	7
Rainfed	KNSp	7B	7B_Rf_KNSp,W15_ACWV,BS00101408_51	657869278	654950222	2.91906	6
Rainfed	PH	4B	4B_Rf_PH,W135_AQGS,AX-110400483	15268438	14343341	0.925097	4
Rainfed	KNSp	4A	4A_Rf_KNSp,W135_ALDH,AX-109855651	594659453	594530554	0.128899	2
Rainfed	KNSp	1D	1D_Rf_KNSp,W135_COMQ,AX-158540470	33470449	33470449	0	1
Rainfed	KNSp	6A	6A_Rf_KNSp,W135_HOMY,AX-89343036	16229407	16229407	0	1
Rainfed	PBW	5D	5D_Rf_PBW,W135_AJWO,AX-109506123	528818863	528818863	0	1
Rainfed	PH	5B	5B_Rf_PH,W135_BASV,AX-111486916	587071133	587071133	0	1
Rainfed	SDW	5D	5D_Rf_SDW,W135_AJWO,AX-109506123	528818863	528818863	0	1
Rainfed	TKW	6A	6A_Rf_TKW,W15_AGXR,GENE_3659_104	101302690	101302690	0	1

## Sheet: Table Sxl5
Genes Catergory	Marker and Traits information	Water regimes	Genes name	Human.Readable.Description	Pfam.IDs..Description.	Interpro.IDs..Description.	GO.IDs..Description..via.Interpro	Interpro.Ids	GO.IDs.via.Interpro
Stress and defense related proteins/ Chaperone	1D_Nb8_D_PH_W135_HNTK.AX-86171904	Drought	TraesCS1D01G019700.1	Disease resistance protein RPM1	PF00931: NB-ARC domain	IPR002182: NB-ARC; IPR011991: Winged helix-turn-helix DNA-binding domain; IPR027417: P-loop containing nucleoside triphosphate hydrolase; IPR032675: Leucine-rich repeat domain, L domain-like	GO:0043531 MF: ADP binding	IPR002182; IPR011991; IPR027417; IPR032675	GO:0043531
Antiporter and transmembrane proteins	1D_Nb8_D_PH_W135_HNTK.AX-86171904	Drought	TraesCS1D01G019900.1	Regulator of chromosome condensation (RCC1) family with FYVE zinc finger domain	PF00415: Regulator of chromosome condensation (RCC1) repeat; PF01363: FYVE zinc finger; PF13713: Transcription factor BRX N-terminal domain; PF08381: Transcription factor regulating root and shoot growth via Pin3	IPR000306: FYVE zinc finger; IPR000408: Regulator of chromosome condensation, RCC1; IPR009091: Regulator of chromosome condensation 1/beta-lactamase-inhibitor protein II; IPR011011: Zinc finger, FYVE/PHD-type; IPR013083: Zinc finger, RING/FYVE/PHD-type; IPR013591: Brevis radix (BRX) domain; IPR017455: Zinc finger, FYVE-related; IPR027988: Transcription factor BREVIS RADIX, N-terminal domain	GO:0046872 MF: metal ion binding	IPR000306; IPR000408; IPR009091; IPR011011; IPR013083; IPR013591; IPR017455; IPR027988	GO:0046872
Amino Acid Metabolism	2D_Nb1_D_PBW_W135_BCLB.AX-111561744	Drought	TraesCS2D01G058300.1	Cystathionine gamma-synthase	PF01053: Cys/Met metabolism PLP-dependent enzyme	IPR000277: Cys/Met metabolism, pyridoxal phosphate-dependent enzyme; IPR015421: Pyridoxal phosphate-dependent transferase, major region, subdomain 1; IPR015422: Pyridoxal phosphate-dependent transferase, subdomain 2; IPR015424: Pyridoxal phosphate-dependent transferase	GO:0003824 MF: catalytic activity;GO:0030170 MF: pyridoxal phosphate binding	IPR000277; IPR015421; IPR015422; IPR015424	GO:0003824; GO:0030170
Redox homeostasis and detoxification	2D_Nb1_D_PBW_W135_BCLB.AX-111561744	Drought	TraesCS2D01G058500.1	Cytochrome P450 family protein	PF00067: Cytochrome P450	IPR001128: Cytochrome P450; IPR002401: Cytochrome P450, E-class, group I; IPR017972: Cytochrome P450, conserved site	GO:0005506 MF: iron ion binding;GO:0016705 MF: oxidoreductase activity, acting on paired donors, with incorporation or reduction of molecular oxygen;GO:0020037 MF: heme binding;GO:0055114 BP: oxidation-reduction process	IPR001128; IPR002401; IPR017972	GO:0005506; GO:0016705; GO:0020037; GO:0055114
Redox homeostasis and detoxification	2D_Nb1_D_PBW_W135_BCLB.AX-111561744	Drought	TraesCS2D01G058600.1	Cytochrome P450 family protein, expressed	PF00067: Cytochrome P450	IPR001128: Cytochrome P450; IPR002401: Cytochrome P450, E-class, group I; IPR017972: Cytochrome P450, conserved site	GO:0005506 MF: iron ion binding;GO:0016705 MF: oxidoreductase activity, acting on paired donors, with incorporation or reduction of molecular oxygen;GO:0020037 MF: heme binding;GO:0055114 BP: oxidation-reduction process	IPR001128; IPR002401; IPR017972	GO:0005506; GO:0016705; GO:0020037; GO:0055114
Antiporter and transmembrane proteins	2D_Nb1_D_PBW_W135_BCLB.AX-111561744	Drought	TraesCS2D01G058700.1	Cation-chloride cotransporter 1	PF00324: Amino acid permease; PF03522: Solute carrier family 12	IPR004841: Amino acid permease/ SLC12A domain; IPR004842: SLC12A transporter family; IPR018491: SLC12A transporter, C-terminal	GO:0005215 MF: transporter activity;GO:0006810 BP: transport;GO:0006811 BP: ion transport;GO:0015377 MF: cation:chloride symporter activity;GO:0016020 CC: membrane;GO:0016021 CC: integral component of membrane;GO:0055085 BP: transmembrane transport	IPR004841; IPR004842; IPR018491	GO:0005215; GO:0006810; GO:0006811; GO:0015377; GO:0016020; GO:0016021; GO:0055085
Signal transduction	2D_Nb1_D_PBW_W135_BCLB.AX-111561744	Drought	TraesCS2D01G058800.1	F-box protein family-like	PF03478: Protein of unknown function (DUF295)	IPR001810: F-box domain; IPR005174: Domain unknown function DUF295	GO:0005515 MF: protein binding	IPR001810; IPR005174	GO:0005515
Redox homeostasis and detoxification	2D_Nb1_D_PBW_W135_BCLB.AX-111561744	Drought	TraesCS2D01G058900.1	Cytochrome P450	PF00067: Cytochrome P450	IPR001128: Cytochrome P450; IPR002401: Cytochrome P450, E-class, group I; IPR017972: Cytochrome P450, conserved site	GO:0005506 MF: iron ion binding;GO:0016705 MF: oxidoreductase activity, acting on paired donors, with incorporation or reduction of molecular oxygen;GO:0020037 MF: heme binding;GO:0055114 BP: oxidation-reduction process	IPR001128; IPR002401; IPR017972	GO:0005506; GO:0016705; GO:0020037; GO:0055114
Signal transduction	2D_Nb1_D_PBW_W135_BCLB.AX-111561744	Drought	TraesCS2D01G059000.1	F-box domain containing protein	NA	IPR001810: F-box domain	GO:0005515 MF: protein binding	IPR001810	GO:0005515
Repair, protection and cell wall modification	2D_Nb1_D_PBW_W135_BCLB.AX-111561744	Drought	TraesCS2D01G059500.1	BTB/POZ and MATH domain-containing protein 2	PF00917: MATH domain; PF00651: BTB/POZ domain	IPR000210: BTB/POZ domain; IPR002083: MATH/TRAF domain; IPR008974: TRAF-like; IPR011333: SKP1/BTB/POZ domain	GO:0005515 MF: protein binding	IPR000210; IPR002083; IPR008974; IPR011333	GO:0005515
Redox homeostasis and detoxification	2D_Nb1_D_PBW_W135_BCLB.AX-111561744	Drought	TraesCS2D01G059600.1	2-oxoglutarate-dependent dioxygenase-related family protein	PF03171: 2OG-Fe(II) oxygenase superfamily	IPR005123: Oxoglutarate/iron-dependent dioxygenase; IPR027443: Isopenicillin N synthase-like	GO:0016491 MF: oxidoreductase activity;GO:0055114 BP: oxidation-reduction process	IPR005123; IPR027443	GO:0016491; GO:0055114
Repair, protection and cell wall modification	2D_Nb1_D_PBW_W135_BCLB.AX-111561744	Drought	TraesCS2D01G059700.1	BTB/POZ domain-containing protein	PF00651: BTB/POZ domain	IPR000210: BTB/POZ domain; IPR011333: SKP1/BTB/POZ domain	GO:0005515 MF: protein binding	IPR000210; IPR011333	GO:0005515
Others	2D_Nb1_D_PBW_W135_BCLB.AX-111561744	Drought	TraesCS2D01G059800.1	RNA-binding family protein	PF00076: RNA recognition motif. (a.k.a. RRM, RBD, or RNP domain)	IPR000504: RNA recognition motif domain; IPR025715: Chromatin target of PRMT1 protein, C-terminal	GO:0003676 MF: nucleic acid binding	IPR000504; IPR025715	GO:0003676
Others	2D_Nb1_D_PBW_W135_BCLB.AX-111561744	Drought	TraesCS2D01G059900.1	3'-N-debenzoyl-2'-deoxytaxol N-benzoyltransferase	PF02458: Transferase family	IPR003480: Transferase	GO:0016747 MF: transferase activity, transferring acyl groups other than amino-acyl groups	IPR003480	GO:0016747
Repair, protection and cell wall modification	2D_Nb1_D_PBW_W135_BCLB.AX-111561744	Drought	TraesCS2D01G060000.1	SNARE-interacting protein KEULE	PF00995: Sec1 family	IPR001619: Sec1-like protein	GO:0006904 BP: vesicle docking involved in exocytosis;GO:0016192 BP: vesicle-mediated transport	IPR001619	GO:0006904; GO:0016192
Others	2D_Nb1_D_PBW_W135_BCLB.AX-111561744	Drought	TraesCS2D01G060100.3	Cleavage and polyadenylation specificity factor subunit 1	PF10433: Mono-functional DNA-alkylating methyl methanesulfonate N-term; PF03178: CPSF A subunit region	IPR004871: Cleavage/polyadenylation specificity factor, A subunit, C-terminal; IPR015943: WD40/YVTN repeat-like-containing domain	GO:0003676 MF: nucleic acid binding;GO:0005515 MF: protein binding;GO:0005634 CC: nucleus	IPR004871; IPR015943	GO:0003676; GO:0005515; GO:0005634
Redox homeostasis and detoxification	2D_Nb1_D_PBW_W135_BCLB.AX-111561744	Drought	TraesCS2D01G060200.1	6-phosphogluconate dehydrogenase-like protein	PF03446: NAD binding domain of 6-phosphogluconate dehydrogenase; PF14833: NAD-binding of NADP-dependent 3-hydroxyisobutyrate dehydrogenase	IPR006115: 6-phosphogluconate dehydrogenase, NADP-binding; IPR008927: 6-phosphogluconate dehydrogenase C-terminal domain-like; IPR013328: 6-phosphogluconate dehydrogenase, domain 2; IPR015815: 3-hydroxyisobutyrate dehydrogenase-related; IPR016040: NAD(P)-binding domain; IPR029154: 3-hydroxyisobutyrate dehydrogenase, NAD-binding domain	GO:0004616 MF: phosphogluconate dehydrogenase (decarboxylating) activity;GO:0016491 MF: oxidoreductase activity;GO:0051287 MF: NAD binding;GO:0055114 BP: oxidation-reduction process	IPR006115; IPR008927; IPR013328; IPR015815; IPR016040; IPR029154	GO:0004616; GO:0016491; GO:0051287; GO:0055114
Signal transduction	2D_Nb1_D_PBW_W135_BCLB.AX-111561744	Drought	TraesCS2D01G060400.1	F-box protein	PF00646: F-box domain	IPR001810: F-box domain	GO:0005515 MF: protein binding	IPR001810	GO:0005515
Others	2D_Nb1_D_PBW_W135_BCLB.AX-111561744	Drought	TraesCS2D01G060600.1	WD-repeat protein, putative	PF00400: WD domain, G-beta repeat	IPR001680: WD40 repeat; IPR015943: WD40/YVTN repeat-like-containing domain; IPR017986: WD40-repeat-containing domain; IPR019775: WD40 repeat, conserved site	GO:0005515 MF: protein binding	IPR001680; IPR015943; IPR017986; IPR019775	GO:0005515
Signal transduction	2D_Nb1_D_PBW_W135_BCLB.AX-111561744	Drought	TraesCS2D01G060700.1	F-box protein	PF00646: F-box domain	IPR001810: F-box domain	GO:0005515 MF: protein binding	IPR001810	GO:0005515
Others	2D_Nb1_D_PBW_W135_BCLB.AX-111561744	Drought	TraesCS2D01G060800.1	Endo-1,4-beta-xylanase	PF00331: Glycosyl hydrolase family 10	IPR001000: Glycoside hydrolase family 10 domain; IPR008979: Galactose-binding domain-like; IPR017853: Glycoside hydrolase superfamily	GO:0004553 MF: hydrolase activity, hydrolyzing O-glycosyl compounds;GO:0005975 BP: carbohydrate metabolic process	IPR001000; IPR008979; IPR017853	GO:0004553; GO:0005975
Sugar metabolism	2D_Nb1_D_SDW_W135_FVHQ.AX-158597800	Drought	TraesCS2D01G055000.1	Glycosyltransferase	PF00201: UDP-glucoronosyl and UDP-glucosyl transferase	IPR002213: UDP-glucuronosyl/UDP-glucosyltransferase	GO:0008152 BP: metabolic process;GO:0016758 MF: transferase activity, transferring hexosyl groups	IPR002213	GO:0008152; GO:0016758
Sugar metabolism	2D_Nb1_D_SDW_W135_FVHQ.AX-158597800	Drought	TraesCS2D01G055100.1	Glycosyltransferase	PF00201: UDP-glucoronosyl and UDP-glucosyl transferase	IPR002213: UDP-glucuronosyl/UDP-glucosyltransferase	GO:0008152 BP: metabolic process;GO:0016758 MF: transferase activity, transferring hexosyl groups	IPR002213	GO:0008152; GO:0016758
Others	2D_Nb1_D_SDW_W135_FVHQ.AX-158597800	Drought	TraesCS2D01G055300.1	Sulfotransferase	PF00685: Sulfotransferase domain	IPR000863: Sulfotransferase domain; IPR027417: P-loop containing nucleoside triphosphate hydrolase	GO:0008146 MF: sulfotransferase activity	IPR000863; IPR027417	GO:0008146
Others	2D_Nb1_D_SDW_W135_FVHQ.AX-158597800	Drought	TraesCS2D01G055400.1	Sulfotransferase	PF00685: Sulfotransferase domain	IPR000863: Sulfotransferase domain; IPR027417: P-loop containing nucleoside triphosphate hydrolase	GO:0008146 MF: sulfotransferase activity	IPR000863; IPR027417	GO:0008146
Others	2D_Nb1_D_SDW_W135_FVHQ.AX-158597800	Drought	TraesCS2D01G055500.1	Sulfotransferase	PF00685: Sulfotransferase domain	IPR000863: Sulfotransferase domain; IPR027417: P-loop containing nucleoside triphosphate hydrolase	GO:0008146 MF: sulfotransferase activity	IPR000863; IPR027417	GO:0008146
Antiporter and transmembrane proteins	2D_Nb1_D_SDW_W135_FVHQ.AX-158597800	Drought	TraesCS2D01G055600.1	ABC subfamily C transporter	PF00664: ABC transporter transmembrane region; PF00005: ABC transporter	IPR003439: ABC transporter-like; IPR003593: AAA+ ATPase domain; IPR011527: ABC transporter type 1, transmembrane domain; IPR017871: ABC transporter, conserved site; IPR027417: P-loop containing nucleoside triphosphate hydrolase	GO:0005524 MF: ATP binding;GO:0006810 BP: transport;GO:0016021 CC: integral component of membrane;GO:0016887 MF: ATPase activity;GO:0042626 MF: ATPase activity, coupled to transmembrane movement of substances;GO:0055085 BP: transmembrane transport	IPR003439; IPR003593; IPR011527; IPR017871; IPR027417	GO:0005524; GO:0006810; GO:0016021; GO:0016887; GO:0042626; GO:0055085
Antiporter and transmembrane proteins	2D_Nb1_D_SDW_W135_FVHQ.AX-158597800	Drought	TraesCS2D01G055800.1	ABC subfamily C transporter	PF00664: ABC transporter transmembrane region; PF00005: ABC transporter	IPR003439: ABC transporter-like; IPR003593: AAA+ ATPase domain; IPR011527: ABC transporter type 1, transmembrane domain; IPR017871: ABC transporter, conserved site; IPR027417: P-loop containing nucleoside triphosphate hydrolase	GO:0005524 MF: ATP binding;GO:0006810 BP: transport;GO:0016021 CC: integral component of membrane;GO:0016887 MF: ATPase activity;GO:0042626 MF: ATPase activity, coupled to transmembrane movement of substances;GO:0055085 BP: transmembrane transport	IPR003439; IPR003593; IPR011527; IPR017871; IPR027417	GO:0005524; GO:0006810; GO:0016021; GO:0016887; GO:0042626; GO:0055085
Signal transduction	2D_Nb1_D_SDW_W135_FVHQ.AX-158597800	Drought	TraesCS2D01G055900.1	Protein kinase	PF00139: Legume lectin domain; PF07714: Protein tyrosine kinase	IPR000719: Protein kinase domain; IPR001220: Legume lectin domain; IPR001245: Serine-threonine/tyrosine-protein kinase, catalytic domain; IPR008271: Serine/threonine-protein kinase, active site; IPR011009: Protein kinase-like domain; IPR013320: Concanavalin A-like lectin/glucanase domain; IPR017441: Protein kinase, ATP binding site; IPR019825: Legume lectin, beta chain, Mn/Ca-binding site	GO:0004672 MF: protein kinase activity;GO:0005524 MF: ATP binding;GO:0006468 BP: protein phosphorylation;GO:0030246 MF: carbohydrate binding	IPR000719; IPR001220; IPR001245; IPR008271; IPR011009; IPR013320; IPR017441; IPR019825	GO:0004672; GO:0005524; GO:0006468; GO:0030246
Antiporter and transmembrane proteins	2D_Nb1_D_SDW_W135_FVHQ.AX-158597800	Drought	TraesCS2D01G056300.2	Multidrug resistance protein ABC transporter family protein	PF00664: ABC transporter transmembrane region; PF00005: ABC transporter	IPR003439: ABC transporter-like; IPR003593: AAA+ ATPase domain; IPR011527: ABC transporter type 1, transmembrane domain; IPR017871: ABC transporter, conserved site; IPR027417: P-loop containing nucleoside triphosphate hydrolase	GO:0005524 MF: ATP binding;GO:0006810 BP: transport;GO:0016021 CC: integral component of membrane;GO:0016887 MF: ATPase activity;GO:0042626 MF: ATPase activity, coupled to transmembrane movement of substances;GO:0055085 BP: transmembrane transport	IPR003439; IPR003593; IPR011527; IPR017871; IPR027417	GO:0005524; GO:0006810; GO:0016021; GO:0016887; GO:0042626; GO:0055085
Others	2D_Nb1_D_SDW_W135_FVHQ.AX-158597800	Drought	TraesCS2D01G056500.1	Calcium-dependent lipid-binding (CaLB domain) family protein	PF00168: C2 domain	IPR000008: C2 domain	GO:0005515 MF: protein binding	IPR000008	GO:0005515
Signal transduction	2D_Nb1_D_SDW_W135_FVHQ.AX-158597800	Drought	TraesCS2D01G056600.1	Leucine-rich repeat receptor-like protein kinase family protein	PF08263: Leucine rich repeat N-terminal domain; PF00560: Leucine Rich Repeat; PF13855: Leucine rich repeat; PF13516: Leucine Rich repeat	IPR001611: Leucine-rich repeat; IPR003591: Leucine-rich repeat, typical subtype; IPR013210: Leucine-rich repeat-containing N-terminal, plant-type; IPR032675: Leucine-rich repeat domain, L domain-like	GO:0005515 MF: protein binding	IPR001611; IPR003591; IPR013210; IPR032675	GO:0005515
Others	2D_Nb1_D_SDW_W135_FVHQ.AX-158597800	Drought	TraesCS2D01G057000.1	Acidic chitinase	PF00704: Glycosyl hydrolases family 18	IPR001223: Glycoside hydrolase family 18, catalytic domain; IPR017853: Glycoside hydrolase superfamily	GO:0005975 BP: carbohydrate metabolic process	IPR001223; IPR017853	GO:0005975
Others	2D_Nb1_D_SDW_W135_FVHQ.AX-158597800	Drought	TraesCS2D01G057200.1	Cysteine protease	PF08246: Cathepsin propeptide inhibitor domain (I29); PF00112: Papain family cysteine protease	IPR000668: Peptidase C1A, papain C-terminal; IPR013201: Cathepsin propeptide inhibitor domain (I29)	GO:0006508 BP: proteolysis;GO:0008234 MF: cysteine-type peptidase activity	IPR000668; IPR013201	GO:0006508; GO:0008234
Signal transduction	2D_Nb1_D_SDW_W135_FVHQ.AX-158597800	Drought	TraesCS2D01G057300.1	Leucine-rich repeat receptor-like protein kinase family protein	PF08263: Leucine rich repeat N-terminal domain; PF00560: Leucine Rich Repeat; PF13855: Leucine rich repeat	IPR001611: Leucine-rich repeat; IPR003591: Leucine-rich repeat, typical subtype; IPR013210: Leucine-rich repeat-containing N-terminal, plant-type; IPR032675: Leucine-rich repeat domain, L domain-like	GO:0005515 MF: protein binding	IPR001611; IPR003591; IPR013210; IPR032675	GO:0005515
Signal transduction	2D_Nb1_D_SDW_W135_FVHQ.AX-158597800	Drought	TraesCS2D01G057400.2	F-box domain containing protein	NA	IPR001810: F-box domain	GO:0005515 MF: protein binding	IPR001810	GO:0005515
Others	2D_Nb1_D_SDW_W135_FVHQ.AX-158597800	Drought	TraesCS2D01G057500.1	Xaa-Pro dipeptidase	PF05195: Aminopeptidase P, N-terminal domain; PF00557: Metallopeptidase family M24	IPR000994: Peptidase M24; IPR007865: Aminopeptidase P, N-terminal; IPR028980: Creatinase/Aminopeptidase P, N-terminal; IPR029149: Creatinase/Aminopeptidase P/Spt16, N-terminal	GO:0004177 MF: aminopeptidase activity;GO:0030145 MF: manganese ion binding	IPR000994; IPR007865; IPR028980; IPR029149	GO:0004177; GO:0030145
Stress and defense related proteins/ Chaperone	2D_Nb1_D_SDW_W135_FVHQ.AX-158597800	Drought	TraesCS2D01G057600.1	disease resistance protein (TIR-NBS-LRR class)	PF00931: NB-ARC domain; PF01419: Jacalin-like lectin domain	IPR001229: Jacalin-like lectin domain; IPR002182: NB-ARC; IPR011991: Winged helix-turn-helix DNA-binding domain; IPR027417: P-loop containing nucleoside triphosphate hydrolase; IPR032675: Leucine-rich repeat domain, L domain-like	GO:0043531 MF: ADP binding	IPR001229; IPR002182; IPR011991; IPR027417; IPR032675	GO:0043531
Signal transduction	2D_Nb1_D_SDW_W135_FVHQ.AX-158597800	Drought	TraesCS2D01G057700.1	receptor kinase 1	PF00069: Protein kinase domain; PF00635: MSP (Major sperm protein) domain	IPR000535: Major sperm protein (MSP) domain; IPR000719: Protein kinase domain; IPR008271: Serine/threonine-protein kinase, active site; IPR008962: PapD-like; IPR011009: Protein kinase-like domain; IPR013783: Immunoglobulin-like fold; IPR017441: Protein kinase, ATP binding site	GO:0004672 MF: protein kinase activity;GO:0005524 MF: ATP binding;GO:0006468 BP: protein phosphorylation	IPR000535; IPR000719; IPR008271; IPR008962; IPR011009; IPR013783; IPR017441	GO:0004672; GO:0005524; GO:0006468
Stress and defense related proteins/ Chaperone	2D_Nb1_D_SDW_W135_FVHQ.AX-158597800	Drought	TraesCS2D01G057900.1	Chaperone protein DnaJ	NA	IPR001305: Heat shock protein DnaJ, cysteine-rich domain	GO:0031072 MF: heat shock protein binding;GO:0051082 MF: unfolded protein binding	IPR001305	GO:0031072; GO:0051082
Amino Acid Metabolism	2D_Nb1_D_SDW_W135_FVHQ.AX-158597800	Drought	TraesCS2D01G058000.1	Cystathionine gamma-synthase	PF01053: Cys/Met metabolism PLP-dependent enzyme	IPR000277: Cys/Met metabolism, pyridoxal phosphate-dependent enzyme; IPR015421: Pyridoxal phosphate-dependent transferase, major region, subdomain 1; IPR015422: Pyridoxal phosphate-dependent transferase, subdomain 2; IPR015424: Pyridoxal phosphate-dependent transferase	GO:0003824 MF: catalytic activity;GO:0030170 MF: pyridoxal phosphate binding	IPR000277; IPR015421; IPR015422; IPR015424	GO:0003824; GO:0030170
Amino Acid Metabolism	2D_Nb1_D_SDW_W135_FVHQ.AX-158597800	Drought	TraesCS2D01G058100.1	Cystathionine gamma-synthase	PF01053: Cys/Met metabolism PLP-dependent enzyme	IPR000277: Cys/Met metabolism, pyridoxal phosphate-dependent enzyme; IPR015421: Pyridoxal phosphate-dependent transferase, major region, subdomain 1; IPR015422: Pyridoxal phosphate-dependent transferase, subdomain 2; IPR015424: Pyridoxal phosphate-dependent transferase	GO:0003824 MF: catalytic activity;GO:0030170 MF: pyridoxal phosphate binding	IPR000277; IPR015421; IPR015422; IPR015424	GO:0003824; GO:0030170
Transcription factors and translation	4A_Nb2_K_KNSp_W135_ALDH.AX-109855651	Rainfed	TraesCS4A01G290700.1	AGAMOUS-like MADS-box transcription factor	PF00319: SRF-type transcription factor (DNA-binding and dimerisation domain)	IPR002100: Transcription factor, MADS-box	GO:0003677 MF: DNA binding;GO:0046983 MF: protein dimerization activity	IPR002100	GO:0003677; GO:0046983
Transcription factors and translation	4A_Nb2_K_KNSp_W135_ALDH.AX-109855651	Rainfed	TraesCS4A01G291200.1	BZIP transcription factor	PF00170: bZIP transcription factor	IPR004827: Basic-leucine zipper domain	GO:0003700 MF: transcription factor activity, sequence-specific DNA binding;GO:0006355 BP: regulation of transcription, DNA-templated;GO:0043565 MF: sequence-specific DNA binding	IPR004827	GO:0003700; GO:0006355; GO:0043565
Others	4A_Nb2_K_KNSp_W135_ALDH.AX-109855651	Rainfed	TraesCS4A01G291500.1	Growth-regulating factor	PF08880: QLQ; PF08879: WRC	IPR014977: WRC domain; IPR014978: Glutamine-Leucine-Glutamine, QLQ	GO:0005524 MF: ATP binding;GO:0005634 CC: nucleus;GO:0006355 BP: regulation of transcription, DNA-templated	IPR014977; IPR014978	GO:0005524; GO:0005634; GO:0006355
Transcription factors and translation	4A_Nb3_D_KNSp_W135_CRAK.AX-158542180	Drought	TraesCS4A01G005500.1	Ethylene-responsive transcription factor	PF00847: AP2 domain	IPR001471: AP2/ERF domain; IPR016177: DNA-binding domain	GO:0003677 MF: DNA binding;GO:0003700 MF: transcription factor activity, sequence-specific DNA binding;GO:0006355 BP: regulation of transcription, DNA-templated	IPR001471; IPR016177	GO:0003677; GO:0003700; GO:0006355
Transcription factors and translation	4A_Nb3_D_KNSp_W135_CRAK.AX-158542180	Drought	TraesCS4A01G005600.1	Ethylene-responsive transcription factor	PF00847: AP2 domain	IPR001471: AP2/ERF domain; IPR016177: DNA-binding domain	GO:0003677 MF: DNA binding;GO:0003700 MF: transcription factor activity, sequence-specific DNA binding;GO:0006355 BP: regulation of transcription, DNA-templated	IPR001471; IPR016177	GO:0003677; GO:0003700; GO:0006355
Others	4A_Nb3_D_KNSp_W135_CRAK.AX-158542180	Drought	TraesCS4A01G005700.1	Trypsin inhibitor	NA	IPR000877: Proteinase inhibitor I12, Bowman-Birk	GO:0004867 MF: serine-type endopeptidase inhibitor activity;GO:0005576 CC: extracellular region	IPR000877	GO:0004867; GO:0005576
Transcription factors and translation	4A_Nb3_D_KNSp_W135_CRAK.AX-158542180	Drought	TraesCS4A01G005800.1	Ethylene-responsive transcription factor	NA	IPR001471: AP2/ERF domain; IPR016177: DNA-binding domain	GO:0003677 MF: DNA binding;GO:0003700 MF: transcription factor activity, sequence-specific DNA binding;GO:0006355 BP: regulation of transcription, DNA-templated	IPR001471; IPR016177	GO:0003677; GO:0003700; GO:0006355
Others	4A_Nb3_D_KNSp_W135_CRAK.AX-158542180	Drought	TraesCS4A01G005900.1	Eukaryotic translation initiation factor 3 subunit K	PF10075: CSN8/PSMD8/EIF3K family	IPR009374: Eukaryotic translation initiation factor 3 subunit K; IPR011991: Winged helix-turn-helix DNA-binding domain; IPR016020: Translation initiation factor 3, subunit 12, N-terminal, eukaryotic; IPR016024: Armadillo-type fold; IPR033464: CSN8/PSMD8/EIF3K	GO:0003743 MF: translation initiation factor activity;GO:0005488 MF: binding;GO:0005737 CC: cytoplasm;GO:0005852 CC: eukaryotic translation initiation factor 3 complex;GO:0006446 BP: regulation of translational initiation;GO:0043022 MF: ribosome binding	IPR009374; IPR011991; IPR016020; IPR016024; IPR033464	GO:0003743; GO:0005488; GO:0005737; GO:0005852; GO:0006446; GO:0043022
Osmo-protectant synthesis related protein	4A_Nb3_D_KNSp_W135_CRAK.AX-158542180	Drought	TraesCS4A01G006000.1	40S ribosomal protein SA	PF00318: Ribosomal protein S2	IPR001865: Ribosomal protein S2; IPR005707: Ribosomal protein S2, eukaryotic/archaeal; IPR018130: Ribosomal protein S2, conserved site; IPR023591: Ribosomal protein S2, flavodoxin-like domain; IPR027498: Ribosomal protein S2, eukaryotic	GO:0003735 MF: structural constituent of ribosome;GO:0005622 CC: intracellular;GO:0005840 CC: ribosome;GO:0006412 BP: translation;GO:0015935 CC: small ribosomal subunit	IPR001865; IPR005707; IPR018130; IPR023591; IPR027498	GO:0003735; GO:0005622; GO:0005840; GO:0006412; GO:0015935
Transcription factors and translation	4A_Nb3_D_KNSp_W135_CRAK.AX-158542180	Drought	TraesCS4A01G006100.1	MYB transcription factor	PF00249: Myb-like DNA-binding domain	IPR001005: SANT/Myb domain; IPR009057: Homeobox domain-like; IPR017930: Myb domain	GO:0003677 MF: DNA binding	IPR001005; IPR009057; IPR017930	GO:0003677
Others	4A_Nb3_D_KNSp_W135_CRAK.AX-158542180	Drought	TraesCS4A01G006200.2	Phosphoinositide phosphatase family protein	PF02383: SacI homology domain	IPR002013: SAC domain	GO:0042578 MF: phosphoric ester hydrolase activity	IPR002013	GO:0042578
Redox homeostasis and detoxification	4A_Nb3_D_KNSp_W135_CRAK.AX-158542180	Drought	TraesCS4A01G006300.1	Flavin-containing monooxygenase	PF00743: Flavin-binding monooxygenase-like	IPR012143: Dimethylaniline monooxygenase, N-oxide-forming; IPR020946: Flavin monooxygenase-like; IPR023753: FAD/NAD(P)-binding domain	GO:0004499 MF: N,N-dimethylaniline monooxygenase activity;GO:0016491 MF: oxidoreductase activity;GO:0050660 MF: flavin adenine dinucleotide binding;GO:0050661 MF: NADP binding;GO:0055114 BP: oxidation-reduction process	IPR012143; IPR020946; IPR023753	GO:0004499; GO:0016491; GO:0050660; GO:0050661; GO:0055114
Redox homeostasis and detoxification	4A_Nb3_D_KNSp_W135_CRAK.AX-158542180	Drought	TraesCS4A01G006400.1	Flavin-containing monooxygenase	PF00743: Flavin-binding monooxygenase-like	IPR012143: Dimethylaniline monooxygenase, N-oxide-forming; IPR020946: Flavin monooxygenase-like; IPR023753: FAD/NAD(P)-binding domain	GO:0004499 MF: N,N-dimethylaniline monooxygenase activity;GO:0016491 MF: oxidoreductase activity;GO:0050660 MF: flavin adenine dinucleotide binding;GO:0050661 MF: NADP binding;GO:0055114 BP: oxidation-reduction process	IPR012143; IPR020946; IPR023753	GO:0004499; GO:0016491; GO:0050660; GO:0050661; GO:0055114
Redox homeostasis and detoxification	4A_Nb3_D_KNSp_W135_CRAK.AX-158542180	Drought	TraesCS4A01G006500.1	Flavin-containing monooxygenase	PF00743: Flavin-binding monooxygenase-like	IPR020946: Flavin monooxygenase-like; IPR023753: FAD/NAD(P)-binding domain	GO:0004499 MF: N,N-dimethylaniline monooxygenase activity;GO:0016491 MF: oxidoreductase activity;GO:0050660 MF: flavin adenine dinucleotide binding;GO:0050661 MF: NADP binding;GO:0055114 BP: oxidation-reduction process	IPR020946; IPR023753	GO:0004499; GO:0016491; GO:0050660; GO:0050661; GO:0055114
Redox homeostasis and detoxification	4A_Nb3_D_KNSp_W135_CRAK.AX-158542180	Drought	TraesCS4A01G006600.1	Flavin-containing monooxygenase	PF00743: Flavin-binding monooxygenase-like	IPR001613: Flavin amine oxidase; IPR012143: Dimethylaniline monooxygenase, N-oxide-forming; IPR020946: Flavin monooxygenase-like; IPR023753: FAD/NAD(P)-binding domain	GO:0004499 MF: N,N-dimethylaniline monooxygenase activity;GO:0016491 MF: oxidoreductase activity;GO:0050660 MF: flavin adenine dinucleotide binding;GO:0050661 MF: NADP binding;GO:0055114 BP: oxidation-reduction process	IPR001613; IPR012143; IPR020946; IPR023753	GO:0004499; GO:0016491; GO:0050660; GO:0050661; GO:0055114
Redox homeostasis and detoxification	4A_Nb3_D_KNSp_W135_CRAK.AX-158542180	Drought	TraesCS4A01G006700.1	Flavin-containing monooxygenase	PF00743: Flavin-binding monooxygenase-like	IPR012143: Dimethylaniline monooxygenase, N-oxide-forming; IPR020946: Flavin monooxygenase-like; IPR023753: FAD/NAD(P)-binding domain	GO:0004499 MF: N,N-dimethylaniline monooxygenase activity;GO:0016491 MF: oxidoreductase activity;GO:0050660 MF: flavin adenine dinucleotide binding;GO:0050661 MF: NADP binding;GO:0055114 BP: oxidation-reduction process	IPR012143; IPR020946; IPR023753	GO:0004499; GO:0016491; GO:0050660; GO:0050661; GO:0055114
Antiporter and transmembrane proteins	4A_Nb3_D_KNSp_W135_CRAK.AX-158542180	Drought	TraesCS4A01G006900.1	ABC transporter ATP-binding protein	PF00664: ABC transporter transmembrane region; PF00005: ABC transporter	IPR003439: ABC transporter-like; IPR003593: AAA+ ATPase domain; IPR011527: ABC transporter type 1, transmembrane domain; IPR017871: ABC transporter, conserved site; IPR027417: P-loop containing nucleoside triphosphate hydrolase	GO:0005524 MF: ATP binding;GO:0006810 BP: transport;GO:0016021 CC: integral component of membrane;GO:0016887 MF: ATPase activity;GO:0042626 MF: ATPase activity, coupled to transmembrane movement of substances;GO:0055085 BP: transmembrane transport	IPR003439; IPR003593; IPR011527; IPR017871; IPR027417	GO:0005524; GO:0006810; GO:0016021; GO:0016887; GO:0042626; GO:0055085
Others	4A_Nb3_D_KNSp_W135_CRAK.AX-158542180	Drought	TraesCS4A01G007000.1	Pentatricopeptide repeat-containing protein	PF01535: PPR repeat; PF13041: PPR repeat family; PF12854: PPR repeat	IPR002885: Pentatricopeptide repeat; IPR011990: Tetratricopeptide-like helical domain	GO:0005515 MF: protein binding	IPR002885; IPR011990	GO:0005515
Others	4A_Nb3_D_KNSp_W135_CRAK.AX-158542180	Drought	TraesCS4A01G007100.2	Pseudouridine-5'-phosphate glycosidase	PF04227: Indigoidine synthase A like protein	IPR007342: Pseudouridine-5'-phosphate glycosidase	GO:0016798 MF: hydrolase activity, acting on glycosyl bonds	IPR007342	GO:0016798
Osmo-protectant synthesis related protein	4A_Nb3_D_KNSp_W135_CRAK.AX-158542180	Drought	TraesCS4A01G007200.1	50S ribosomal protein L2	PF00181: Ribosomal Proteins L2, RNA binding domain; PF03947: Ribosomal Proteins L2, C-terminal domain	IPR002171: Ribosomal protein L2; IPR008991: Translation protein SH3-like domain; IPR012340: Nucleic acid-binding, OB-fold; IPR014722: Ribosomal protein L2 domain 2; IPR014726: Ribosomal protein L2, domain 3; IPR022666: Ribosomal Proteins L2, RNA binding domain; IPR022669: Ribosomal protein L2, C-terminal; IPR022671: Ribosomal protein L2, conserved site; IPR023672: Ribosomal protein L2, archaeal-t…	GO:0003723 MF: RNA binding;GO:0003735 MF: structural constituent of ribosome;GO:0005622 CC: intracellular;GO:0005840 CC: ribosome;GO:0006412 BP: translation;GO:0015934 CC: large ribosomal subunit	IPR002171; IPR008991; IPR012340; IPR014722; IPR014726; IPR022666; IPR022669; IPR022671; IPR023672	GO:0003723; GO:0003735; GO:0005622; GO:0005840; GO:0006412; GO:0015934
Redox homeostasis and detoxification	4A_Nb3_D_KNSp_W135_CRAK.AX-158542180	Drought	TraesCS4A01G007300.1	Cytochrome P450	PF00067: Cytochrome P450	IPR001128: Cytochrome P450; IPR002401: Cytochrome P450, E-class, group I; IPR017972: Cytochrome P450, conserved site	GO:0005506 MF: iron ion binding;GO:0016705 MF: oxidoreductase activity, acting on paired donors, with incorporation or reduction of molecular oxygen;GO:0020037 MF: heme binding;GO:0055114 BP: oxidation-reduction process	IPR001128; IPR002401; IPR017972	GO:0005506; GO:0016705; GO:0020037; GO:0055114
Amino Acid Metabolism	4A_Nb3_D_KNSp_W135_CRAK.AX-158542180	Drought	TraesCS4A01G007400.1	3-ketoacyl-CoA synthase	PF08392: FAE1/Type III polyketide synthase-like protein; PF08541: 3-Oxoacyl-[acyl-carrier-protein (ACP)] synthase III C terminal	IPR012392: Very-long-chain 3-ketoacyl-CoA synthase; IPR013601: FAE1/Type III polyketide synthase-like protein; IPR013747: 3-Oxoacyl-[acyl-carrier-protein (ACP)] synthase III, C-terminal; IPR016039: Thiolase-like	GO:0003824 MF: catalytic activity;GO:0006633 BP: fatty acid biosynthetic process;GO:0008152 BP: metabolic process;GO:0016020 CC: membrane;GO:0016747 MF: transferase activity, transferring acyl groups other than amino-acyl groups	IPR012392; IPR013601; IPR013747; IPR016039	GO:0003824; GO:0006633; GO:0008152; GO:0016020; GO:0016747
Others	4A_Nb3_D_KNSp_W135_CRAK.AX-158542180	Drought	TraesCS4A01G007600.1	Cyanate hydratase	PF02560: Cyanate lyase C-terminal domain	IPR003712: Cyanate lyase, C-terminal; IPR008076: Cyanate hydratase; IPR010982: Lambda repressor-like, DNA-binding domain	GO:0003677 MF: DNA binding;GO:0008824 MF: cyanate hydratase activity;GO:0009439 BP: cyanate metabolic process	IPR003712; IPR008076; IPR010982	GO:0003677; GO:0008824; GO:0009439
Others	4A_Nb3_D_KNSp_W135_CRAK.AX-158542180	Drought	TraesCS4A01G007700.1	Pollen allergen-like protein	PF01357: Pollen allergen	IPR005453: Pollen allergen Lol p2; IPR007117: Expansin, cellulose-binding-like domain	GO:0005576 CC: extracellular region	IPR005453; IPR007117	GO:0005576
Antiporter and transmembrane proteins	4A_Nb3_D_KNSp_W135_CRAK.AX-158542180	Drought	TraesCS4A01G008300.1	Proteasome subunit alpha type	PF10584: Proteasome subunit A N-terminal signature; PF00227: Proteasome subunit	IPR000426: Proteasome alpha-subunit, N-terminal domain; IPR001353: Proteasome, subunit alpha/beta; IPR023332: Proteasome alpha-type subunit; IPR029055: Nucleophile aminohydrolases, N-terminal	GO:0004175 MF: endopeptidase activity;GO:0004298 MF: threonine-type endopeptidase activity;GO:0005839 CC: proteasome core complex;GO:0006511 BP: ubiquitin-dependent protein catabolic process;GO:0019773 CC: proteasome core complex, alpha-subunit complex;GO:0051603 BP: proteolysis involved in cellular protein catabolic process	IPR000426; IPR001353; IPR023332; IPR029055	GO:0004175; GO:0004298; GO:0005839; GO:0006511; GO:0019773; GO:0051603
Redox homeostasis and detoxification	4A_Nb3_D_KNSp_W135_CRAK.AX-158542180	Drought	TraesCS4A01G008400.1	Glutathione S-transferase	PF02798: Glutathione S-transferase, N-terminal domain; PF13410: Glutathione S-transferase, C-terminal domain	IPR004045: Glutathione S-transferase, N-terminal; IPR010987: Glutathione S-transferase, C-terminal-like; IPR012336: Thioredoxin-like fold	GO:0005515 MF: protein binding	IPR004045; IPR010987; IPR012336	GO:0005515
Redox homeostasis and detoxification	4A_Nb3_D_KNSp_W135_CRAK.AX-158542180	Drought	TraesCS4A01G008800.1	Cytochrome P450, putative, expressed	PF00067: Cytochrome P450	IPR001128: Cytochrome P450; IPR002401: Cytochrome P450, E-class, group I	GO:0005506 MF: iron ion binding;GO:0016705 MF: oxidoreductase activity, acting on paired donors, with incorporation or reduction of molecular oxygen;GO:0020037 MF: heme binding;GO:0055114 BP: oxidation-reduction process	IPR001128; IPR002401	GO:0005506; GO:0016705; GO:0020037; GO:0055114
Antiporter and transmembrane proteins	4A_Nb3_D_KNSp_W135_CRAK.AX-158542180	Drought	TraesCS4A01G008900.1	Zinc finger protein	NA	IPR013083: Zinc finger, RING/FYVE/PHD-type; IPR013087: Zinc finger C2H2-type	GO:0003676 MF: nucleic acid binding	IPR013083; IPR013087	GO:0003676
Antiporter and transmembrane proteins	4A_Nb3_D_KNSp_W135_CRAK.AX-158542180	Drought	TraesCS4A01G009000.1	Cation calcium exchanger	PF01699: Sodium/calcium exchanger protein	IPR004837: Sodium/calcium exchanger membrane region	GO:0016021 CC: integral component of membrane;GO:0055085 BP: transmembrane transport	IPR004837	GO:0016021; GO:0055085
Signal transduction	4A_Nb3_D_KNSp_W135_CRAK.AX-158542180	Drought	TraesCS4A01G009100.1	F-box family protein	NA	IPR001810: F-box domain	GO:0005515 MF: protein binding	IPR001810	GO:0005515
Redox homeostasis and detoxification	4A_Nb3_D_KNSp_W135_CRAK.AX-158542180	Drought	TraesCS4A01G009400.1	Lipoxygenase	PF01477: PLAT/LH2 domain; PF00305: Lipoxygenase	IPR001024: PLAT/LH2 domain; IPR001246: Lipoxygenase, plant; IPR013819: Lipoxygenase, C-terminal; IPR020833: Lipoxygenase, iron binding site; IPR020834: Lipoxygenase, conserved site; IPR027433: Lipoxygenase, domain 3	GO:0005515 MF: protein binding;GO:0016491 MF: oxidoreductase activity;GO:0016702 MF: oxidoreductase activity, acting on single donors with incorporation of molecular oxygen, incorporation of two atoms of oxygen;GO:0046872 MF: metal ion binding;GO:0055114 BP: oxidation-reduction process	IPR001024; IPR001246; IPR013819; IPR020833; IPR020834; IPR027433	GO:0005515; GO:0016491; GO:0016702; GO:0046872; GO:0055114
Antiporter and transmembrane proteins	4A_Nb3_D_KNSp_W135_CRAK.AX-158542180	Drought	TraesCS4A01G009600.1	E3 ubiquitin-protein ligase	NA	IPR011990: Tetratricopeptide-like helical domain	GO:0005515 MF: protein binding	IPR011990	GO:0005515
Others	4A_Nb3_D_KNSp_W135_CRAK.AX-158542180	Drought	TraesCS4A01G009700.1	Anthocyanin 5-aromatic acyltransferase	PF02458: Transferase family	IPR003480: Transferase	GO:0016747 MF: transferase activity, transferring acyl groups other than amino-acyl groups	IPR003480	GO:0016747
Others	4A_Nb3_D_KNSp_W135_CRAK.AX-158542180	Drought	TraesCS4A01G009800.1	Anthocyanin 5-aromatic acyltransferase	PF02458: Transferase family	IPR003480: Transferase	GO:0016747 MF: transferase activity, transferring acyl groups other than amino-acyl groups	IPR003480	GO:0016747
Signal transduction	4A_Nb3_D_KNSp_W135_CRAK.AX-158542180	Drought	TraesCS4A01G009900.1	F-box protein	NA	IPR001810: F-box domain	GO:0005515 MF: protein binding	IPR001810	GO:0005515
Signal transduction	4A_Nb3_D_KNSp_W135_CRAK.AX-158542180	Drought	TraesCS4A01G010000.1	Kinase-like protein	PF07714: Protein tyrosine kinase	IPR000719: Protein kinase domain; IPR001245: Serine-threonine/tyrosine-protein kinase, catalytic domain; IPR008271: Serine/threonine-protein kinase, active site; IPR011009: Protein kinase-like domain	GO:0004672 MF: protein kinase activity;GO:0005524 MF: ATP binding;GO:0006468 BP: protein phosphorylation	IPR000719; IPR001245; IPR008271; IPR011009	GO:0004672; GO:0005524; GO:0006468
Osmo-protectant synthesis related protein	4B_Nb4_K_PH_W135_AQGS.AX-110400483	Rainfed	TraesCS4B01G020200.1	Tryptophan-tRNA ligase	PF00579: tRNA synthetases class I (W and Y)	IPR002305: Aminoacyl-tRNA synthetase, class Ic; IPR002306: Tryptophan-tRNA ligase; IPR014729: Rossmann-like alpha/beta/alpha sandwich fold	GO:0000166 MF: nucleotide binding;GO:0004812 MF: aminoacyl-tRNA ligase activity;GO:0004830 MF: tryptophan-tRNA ligase activity;GO:0005524 MF: ATP binding;GO:0005737 CC: cytoplasm;GO:0006418 BP: tRNA aminoacylation for protein translation;GO:0006436 BP: tryptophanyl-tRNA aminoacylation	IPR002305; IPR002306; IPR014729	GO:0000166; GO:0004812; GO:0004830; GO:0005524; GO:0005737; GO:0006418; GO:0006436
Others	4B_Nb4_K_PH_W135_AQGS.AX-110400483	Rainfed	TraesCS4B01G020300.1	RNA-binding protein	PF00076: RNA recognition motif. (a.k.a. RRM, RBD, or RNP domain)	IPR000504: RNA recognition motif domain	GO:0003676 MF: nucleic acid binding	IPR000504	GO:0003676
Others	4B_Nb4_K_PH_W135_AQGS.AX-110400483	Rainfed	TraesCS4B01G020400.1	Pumilio	NA	IPR011989: Armadillo-like helical; IPR016024: Armadillo-type fold	GO:0005488 MF: binding	IPR011989; IPR016024	GO:0005488
Signal transduction	4B_Nb4_K_PH_W135_AQGS.AX-110400483	Rainfed	TraesCS4B01G020500.2	F-box family protein	PF00646: F-box domain	IPR001810: F-box domain; IPR011990: Tetratricopeptide-like helical domain; IPR015915: Kelch-type beta propeller	GO:0005515 MF: protein binding	IPR001810; IPR011990; IPR015915	GO:0005515
Others	4B_Nb4_K_PH_W135_AQGS.AX-110400483	Rainfed	TraesCS4B01G020700.1	basic helix-loop-helix (bHLH) DNA-binding superfamily protein	PF00010: Helix-loop-helix DNA-binding domain	IPR011598: Myc-type, basic helix-loop-helix (bHLH) domain	GO:0046983 MF: protein dimerization activity	IPR011598	GO:0046983
Others	4B_Nb4_K_PH_W135_AQGS.AX-110400483	Rainfed	TraesCS4B01G020900.1	basic helix-loop-helix (bHLH) DNA-binding superfamily protein	PF00010: Helix-loop-helix DNA-binding domain	IPR011598: Myc-type, basic helix-loop-helix (bHLH) domain	GO:0046983 MF: protein dimerization activity	IPR011598	GO:0046983
Others	4B_Nb4_K_PH_W135_AQGS.AX-110400483	Rainfed	TraesCS4B01G021100.1	Basic helix loop helix (BHLH) DNA-binding family protein	PF00010: Helix-loop-helix DNA-binding domain	IPR011598: Myc-type, basic helix-loop-helix (bHLH) domain	GO:0046983 MF: protein dimerization activity	IPR011598	GO:0046983
Others	4B_Nb4_K_PH_W135_AQGS.AX-110400483	Rainfed	TraesCS4B01G021200.1	basic helix-loop-helix (bHLH) DNA-binding superfamily protein	PF00010: Helix-loop-helix DNA-binding domain	IPR011598: Myc-type, basic helix-loop-helix (bHLH) domain	GO:0046983 MF: protein dimerization activity	IPR011598	GO:0046983
Sugar metabolism	4B_Nb4_K_PH_W135_AQGS.AX-110400483	Rainfed	TraesCS4D01G029400.1	Core-2/I-branching beta-1,6-N-acetylglucosaminyltransferase family protein	PF02485: Core-2/I-Branching enzyme	IPR003406: Glycosyl transferase, family 14	GO:0008375 MF: acetylglucosaminyltransferase activity;GO:0016020 CC: membrane	IPR003406	GO:0008375; GO:0016020
Redox homeostasis and detoxification	4B_Nb4_K_PH_W135_AQGS.AX-110400483	Rainfed	TraesCS4D01G029500.1	Hedgehog-interacting-like protein	PF07995: Glucose / Sorbosone dehydrogenase	IPR011041: Soluble quinoprotein glucose/sorbosone dehydrogenase; IPR011042: Six-bladed beta-propeller, TolB-like; IPR012938: Glucose/Sorbosone dehydrogenase	GO:0003824 MF: catalytic activity;GO:0005975 BP: carbohydrate metabolic process;GO:0016901 MF: oxidoreductase activity, acting on the CH-OH group of donors, quinone or similar compound as acceptor;GO:0048038 MF: quinone binding	IPR011041; IPR011042; IPR012938	GO:0003824; GO:0005975; GO:0016901; GO:0048038
Repair, protection and cell wall modification	4B_Nb4_K_PH_W135_AQGS.AX-110400483	Rainfed	TraesCS4D01G029800.1	Beta-1,3-galactosyltransferase-like protein	PF00337: Galactoside-binding lectin; PF01762: Galactosyltransferase	IPR001079: Galectin, carbohydrate recognition domain; IPR002659: Glycosyl transferase, family 31; IPR013320: Concanavalin A-like lectin/glucanase domain	GO:0006486 BP: protein glycosylation;GO:0008378 MF: galactosyltransferase activity;GO:0016020 CC: membrane;GO:0030246 MF: carbohydrate binding	IPR001079; IPR002659; IPR013320	GO:0006486; GO:0008378; GO:0016020; GO:0030246
Others	4B_Nb4_K_PH_W135_AQGS.AX-110400483	Rainfed	TraesCS4D01G030600.1	Germin-like protein 1	PF00190: Cupin	IPR001929: Germin; IPR006045: Cupin 1; IPR011051: RmlC-like cupin domain; IPR014710: RmlC-like jelly roll fold; IPR019780: Germin, manganese binding site	GO:0030145 MF: manganese ion binding;GO:0045735 MF: nutrient reservoir activity	IPR001929; IPR006045; IPR011051; IPR014710; IPR019780	GO:0030145; GO:0045735
Others	4B_Nb4_K_PH_W135_AQGS.AX-110400483	Rainfed	TraesCS4D01G030700.1	Germin-like protein 1-1	PF00190: Cupin	IPR001929: Germin; IPR006045: Cupin 1; IPR011051: RmlC-like cupin domain; IPR014710: RmlC-like jelly roll fold; IPR019780: Germin, manganese binding site	GO:0030145 MF: manganese ion binding;GO:0045735 MF: nutrient reservoir activity	IPR001929; IPR006045; IPR011051; IPR014710; IPR019780	GO:0030145; GO:0045735
Others	4B_Nb4_K_PH_W135_AQGS.AX-110400483	Rainfed	TraesCS4D01G030800.1	Germin-like protein 1-1	PF00190: Cupin	IPR001929: Germin; IPR006045: Cupin 1; IPR011051: RmlC-like cupin domain; IPR014710: RmlC-like jelly roll fold; IPR019780: Germin, manganese binding site	GO:0030145 MF: manganese ion binding;GO:0045735 MF: nutrient reservoir activity	IPR001929; IPR006045; IPR011051; IPR014710; IPR019780	GO:0030145; GO:0045735
Sugar metabolism	4B_Nb4_K_PH_W135_AQGS.AX-110400483	Rainfed	TraesCS4D01G030900.2	Glycosyltransferase	PF00201: UDP-glucoronosyl and UDP-glucosyl transferase	IPR002213: UDP-glucuronosyl/UDP-glucosyltransferase	GO:0008152 BP: metabolic process;GO:0016758 MF: transferase activity, transferring hexosyl groups	IPR002213	GO:0008152; GO:0016758
Others	4B_Nb4_K_PH_W135_AQGS.AX-110400483	Rainfed	TraesCS4D01G031100.1	PsbP-like protein 1	PF01789: PsbP	IPR002683: PsbP family; IPR016123: Mog1/PsbP, alpha/beta/alpha sandwich	GO:0005509 MF: calcium ion binding;GO:0009523 CC: photosystem II;GO:0009654 CC: photosystem II oxygen evolving complex;GO:0015979 BP: photosynthesis;GO:0019898 CC: extrinsic component of membrane	IPR002683; IPR016123	GO:0005509; GO:0009523; GO:0009654; GO:0015979; GO:0019898
Osmo-protectant synthesis related protein	4B_Nb4_K_PH_W135_AQGS.AX-110400483	Rainfed	TraesCS4D01G031200.1	tRNA (Ile)-lysidine synthase	NA	IPR015943: WD40/YVTN repeat-like-containing domain	GO:0005515 MF: protein binding	IPR015943	GO:0005515
Sugar metabolism	4B_Nb4_K_PH_W135_AQGS.AX-110400483	Rainfed	TraesCS4D01G031500.1	Glycosyltransferase	PF00201: UDP-glucoronosyl and UDP-glucosyl transferase	IPR002213: UDP-glucuronosyl/UDP-glucosyltransferase	GO:0008152 BP: metabolic process;GO:0016758 MF: transferase activity, transferring hexosyl groups	IPR002213	GO:0008152; GO:0016758
Others	4B_Nb4_K_PH_W135_AQGS.AX-110400483	Rainfed	TraesCS4D01G031600.1	Germin-like protein 1	PF00190: Cupin	IPR001929: Germin; IPR006045: Cupin 1; IPR011051: RmlC-like cupin domain; IPR014710: RmlC-like jelly roll fold; IPR019780: Germin, manganese binding site	GO:0030145 MF: manganese ion binding;GO:0045735 MF: nutrient reservoir activity	IPR001929; IPR006045; IPR011051; IPR014710; IPR019780	GO:0030145; GO:0045735
Others	4B_Nb4_K_PH_W135_AQGS.AX-110400483	Rainfed	TraesCS4D01G031700.1	Germin-like protein 1-1	PF00190: Cupin	IPR001929: Germin; IPR006045: Cupin 1; IPR011051: RmlC-like cupin domain; IPR014710: RmlC-like jelly roll fold; IPR019780: Germin, manganese binding site	GO:0030145 MF: manganese ion binding;GO:0045735 MF: nutrient reservoir activity	IPR001929; IPR006045; IPR011051; IPR014710; IPR019780	GO:0030145; GO:0045735
Redox homeostasis and detoxification	5A_Nb7_K_KNSp_W135_ADVC.AX-108905462	Rainfed	TraesCS5A01G390300.2	Transcriptional adapter ADA2	PF00569: Zinc finger, ZZ type; PF00249: Myb-like DNA-binding domain	IPR000433: Zinc finger, ZZ-type; IPR001005: SANT/Myb domain; IPR007526: SWIRM domain; IPR009057: Homeobox domain-like; IPR016827: Transcriptional adaptor 2; IPR017884: SANT domain	GO:0003677 MF: DNA binding;GO:0003713 MF: transcription coactivator activity;GO:0005515 MF: protein binding;GO:0006357 BP: regulation of transcription from RNA polymerase II promoter;GO:0008270 MF: zinc ion binding;GO:0035065 BP: regulation of histone acetylation	IPR000433; IPR001005; IPR007526; IPR009057; IPR016827; IPR017884	GO:0003677; GO:0003713; GO:0005515; GO:0006357; GO:0008270; GO:0035065
Redox homeostasis and detoxification	5A_Nb7_K_KNSp_W135_ADVC.AX-108905462	Rainfed	TraesCS5A01G390500.1	HMG-Y-related protein A	PF00538: linker histone H1 and H5 family	IPR000637: HMG-I/HMG-Y, DNA-binding, conserved site; IPR005818: Linker histone H1/H5, domain H15; IPR005819: Histone H5; IPR011991: Winged helix-turn-helix DNA-binding domain; IPR017956: AT hook, DNA-binding motif	GO:0000786 CC: nucleosome;GO:0003677 MF: DNA binding;GO:0005634 CC: nucleus;GO:0006334 BP: nucleosome assembly;GO:0006355 BP: regulation of transcription, DNA-templated	IPR000637; IPR005818; IPR005819; IPR011991; IPR017956	GO:0000786; GO:0003677; GO:0005634; GO:0006334; GO:0006355
Sugar metabolism	5A_Nb7_K_KNSp_W135_ADVC.AX-108905462	Rainfed	TraesCS5A01G390600.1	Glucan endo-1,3-beta-glucosidase-like protein	PF00332: Glycosyl hydrolases family 17; PF07983: X8 domain	IPR000490: Glycoside hydrolase family 17; IPR012946: X8 domain; IPR017853: Glycoside hydrolase superfamily	GO:0004553 MF: hydrolase activity, hydrolyzing O-glycosyl compounds;GO:0005975 BP: carbohydrate metabolic process	IPR000490; IPR012946; IPR017853	GO:0004553; GO:0005975
Others	5A_Nb7_K_KNSp_W135_ADVC.AX-108905462	Rainfed	TraesCS5A01G390900.1	Protein TORNADO 1	PF13516: Leucine Rich repeat	IPR001611: Leucine-rich repeat; IPR032675: Leucine-rich repeat domain, L domain-like	GO:0005515 MF: protein binding	IPR001611; IPR032675	GO:0005515
Antiporter and transmembrane proteins	5A_Nb7_K_KNSp_W135_ADVC.AX-108905462	Rainfed	TraesCS5A01G391000.1	oligopeptide transporter	PF03169: OPT oligopeptide transporter protein	IPR004648: Tetrapeptide transporter, OPT1/isp4; IPR004813: Oligopeptide transporter, OPT superfamily	GO:0055085 BP: transmembrane transport	IPR004648; IPR004813	GO:0055085
Redox homeostasis and detoxification	5A_Nb7_K_KNSp_W135_ADVC.AX-108905462	Rainfed	TraesCS5A01G391200.2	Heavy metal transport/detoxification superfamily protein	NA	IPR006121: Heavy metal-associated domain, HMA	GO:0030001 BP: metal ion transport;GO:0046872 MF: metal ion binding	IPR006121	GO:0030001; GO:0046872
Signal transduction	5A_Nb7_K_KNSp_W135_ADVC.AX-108905462	Rainfed	TraesCS5A01G391300.2	Phytochrome	PF08446: PAS fold; PF01590: GAF domain; PF00360: Phytochrome region; PF00989: PAS fold; PF00512: His Kinase A (phospho-acceptor) domain	IPR000014: PAS domain; IPR001294: Phytochrome; IPR003018: GAF domain; IPR003594: Histidine kinase-like ATPase, C-terminal domain; IPR003661: Signal transduction histidine kinase, dimerisation/phosphoacceptor domain; IPR005467: Histidine kinase domain; IPR012129: Phytochrome A/B/C/D/E; IPR013515: Phytochrome, central region; IPR013516: Phytochrome chromophore binding site; IPR013654: PAS fold-2; I…	GO:0000155 MF: phosphorelay sensor kinase activity;GO:0005515 MF: protein binding;GO:0006355 BP: regulation of transcription, DNA-templated;GO:0007165 BP: signal transduction;GO:0009584 BP: detection of visible light;GO:0009585 BP: red, far-red light phototransduction;GO:0009881 MF: photoreceptor activity;GO:0017006 BP: protein-tetrapyrrole linkage;GO:0018298 BP: protein-chromophore linkage;GO:00…	IPR000014; IPR001294; IPR003018; IPR003594; IPR003661; IPR005467; IPR012129; IPR013515; IPR013516; IPR013654; IPR013767; IPR016132; IPR029016	GO:0000155; GO:0005515; GO:0006355; GO:0007165; GO:0009584; GO:0009585; GO:0009881; GO:0017006; GO:0018298; GO:0042803
Others	5A_Nb7_K_KNSp_W135_ADVC.AX-108905462	Rainfed	TraesCS5A01G391400.2	DNA topoisomerase 6 subunit A	PF04406: Type IIB DNA topoisomerase	IPR002815: Spo11/DNA topoisomerase VI subunit A; IPR011991: Winged helix-turn-helix DNA-binding domain; IPR013048: Meiotic recombination, Spo11; IPR013049: Spo11/DNA topoisomerase VI, subunit A, N-terminal	GO:0000737 BP: DNA catabolic process, endonucleolytic;GO:0003677 MF: DNA binding;GO:0003824 MF: catalytic activity;GO:0005524 MF: ATP binding;GO:0005694 CC: chromosome;GO:0006259 BP: DNA metabolic process	IPR002815; IPR011991; IPR013048; IPR013049	GO:0000737; GO:0003677; GO:0003824; GO:0005524; GO:0005694; GO:0006259
Plant hormone response	5A_Nb7_K_KNSp_W135_ADVC.AX-108905462	Rainfed	TraesCS5A01G391500.1	Cysteine protease, putative	PF08246: Cathepsin propeptide inhibitor domain (I29); PF00112: Papain family cysteine protease	IPR000169: Cysteine peptidase, cysteine active site; IPR000668: Peptidase C1A, papain C-terminal; IPR013201: Cathepsin propeptide inhibitor domain (I29); IPR025660: Cysteine peptidase, histidine active site; IPR025661: Cysteine peptidase, asparagine active site	GO:0006508 BP: proteolysis;GO:0008234 MF: cysteine-type peptidase activity	IPR000169; IPR000668; IPR013201; IPR025660; IPR025661	GO:0006508; GO:0008234
Transcription factors and translation	5A_Nb7_K_KNSp_W135_ADVC.AX-108905462	Rainfed	TraesCS5A01G391700.1	MADS box transcription factor	PF00319: SRF-type transcription factor (DNA-binding and dimerisation domain); PF01486: K-box region	IPR002100: Transcription factor, MADS-box; IPR002487: Transcription factor, K-box	GO:0003677 MF: DNA binding;GO:0003700 MF: transcription factor activity, sequence-specific DNA binding;GO:0005634 CC: nucleus;GO:0006355 BP: regulation of transcription, DNA-templated;GO:0046983 MF: protein dimerization activity	IPR002100; IPR002487	GO:0003677; GO:0003700; GO:0005634; GO:0006355; GO:0046983
Transcription factors and translation	5A_Nb7_K_KNSp_W135_ADVC.AX-108905462	Rainfed	TraesCS5A01G391800.1	MADS-box transcription factor	PF00319: SRF-type transcription factor (DNA-binding and dimerisation domain); PF01486: K-box region	IPR002100: Transcription factor, MADS-box; IPR002487: Transcription factor, K-box	GO:0003677 MF: DNA binding;GO:0003700 MF: transcription factor activity, sequence-specific DNA binding;GO:0005634 CC: nucleus;GO:0006355 BP: regulation of transcription, DNA-templated;GO:0046983 MF: protein dimerization activity	IPR002100; IPR002487	GO:0003677; GO:0003700; GO:0005634; GO:0006355; GO:0046983
Redox homeostasis and detoxification	5A_Nb7_K_KNSp_W135_ADVC.AX-108905462	Rainfed	TraesCS5A01G391900.1	Cytochrome b5	PF00173: Cytochrome b5-like Heme/Steroid binding domain	IPR001199: Cytochrome b5-like heme/steroid binding domain; IPR018506: Cytochrome b5, heme-binding site	GO:0020037 MF: heme binding	IPR001199; IPR018506	GO:0020037
Others	5A_Nb7_K_KNSp_W135_ADVC.AX-108905462	Rainfed	TraesCS5A01G392000.1	COBRA-like protein	PF04833: COBRA-like protein	IPR006918: COBRA, plant	GO:0010215 BP: cellulose microfibril organization;GO:0016049 BP: cell growth;GO:0031225 CC: anchored component of membrane	IPR006918	GO:0010215; GO:0016049; GO:0031225
Antiporter and transmembrane proteins	5A_Nb7_K_KNSp_W135_ADVC.AX-108905462	Rainfed	TraesCS5A01G392300.1	Mitochondrial carrier family protein	PF00153: Mitochondrial carrier protein	IPR002067: Mitochondrial carrier protein; IPR018108: Mitochondrial substrate/solute carrier; IPR023395: Mitochondrial carrier domain	GO:0055085 BP: transmembrane transport	IPR002067; IPR018108; IPR023395	GO:0055085
Others	5A_Nb7_K_KNSp_W135_ADVC.AX-108905462	Rainfed	TraesCS5A01G392400.1	WD repeat-containing protein	PF00400: WD domain, G-beta repeat	IPR001680: WD40 repeat; IPR011042: Six-bladed beta-propeller, TolB-like; IPR015943: WD40/YVTN repeat-like-containing domain; IPR017986: WD40-repeat-containing domain; IPR019775: WD40 repeat, conserved site	GO:0005515 MF: protein binding	IPR001680; IPR011042; IPR015943; IPR017986; IPR019775	GO:0005515
Signal transduction	5A_Nb7_K_KNSp_W135_ADVC.AX-108905462	Rainfed	TraesCS5A01G392500.1	Kinase family protein	PF00069: Protein kinase domain	IPR000719: Protein kinase domain; IPR011009: Protein kinase-like domain; IPR017441: Protein kinase, ATP binding site	GO:0004672 MF: protein kinase activity;GO:0005524 MF: ATP binding;GO:0006468 BP: protein phosphorylation	IPR000719; IPR011009; IPR017441	GO:0004672; GO:0005524; GO:0006468
Antiporter and transmembrane proteins	5A_Nb7_K_KNSp_W135_ADVC.AX-108905462	Rainfed	TraesCS5A01G392600.1	ABC transporter B family protein	PF00664: ABC transporter transmembrane region; PF00005: ABC transporter	IPR003439: ABC transporter-like; IPR003593: AAA+ ATPase domain; IPR011527: ABC transporter type 1, transmembrane domain; IPR017871: ABC transporter, conserved site; IPR027417: P-loop containing nucleoside triphosphate hydrolase	GO:0005524 MF: ATP binding;GO:0006810 BP: transport;GO:0016021 CC: integral component of membrane;GO:0016887 MF: ATPase activity;GO:0042626 MF: ATPase activity, coupled to transmembrane movement of substances;GO:0055085 BP: transmembrane transport	IPR003439; IPR003593; IPR011527; IPR017871; IPR027417	GO:0005524; GO:0006810; GO:0016021; GO:0016887; GO:0042626; GO:0055085
Antiporter and transmembrane proteins	5A_Nb7_K_KNSp_W135_ADVC.AX-108905462	Rainfed	TraesCS5A01G392700.1	ABC transporter B family protein	PF00664: ABC transporter transmembrane region; PF00005: ABC transporter	IPR003439: ABC transporter-like; IPR003593: AAA+ ATPase domain; IPR011527: ABC transporter type 1, transmembrane domain; IPR017871: ABC transporter, conserved site; IPR027417: P-loop containing nucleoside triphosphate hydrolase	GO:0005524 MF: ATP binding;GO:0006810 BP: transport;GO:0016021 CC: integral component of membrane;GO:0016887 MF: ATPase activity;GO:0042626 MF: ATPase activity, coupled to transmembrane movement of substances;GO:0055085 BP: transmembrane transport	IPR003439; IPR003593; IPR011527; IPR017871; IPR027417	GO:0005524; GO:0006810; GO:0016021; GO:0016887; GO:0042626; GO:0055085
Osmo-protectant synthesis related protein	5A_Nb7_K_KNSp_W135_ADVC.AX-108905462	Rainfed	TraesCS5A01G392900.1	50S ribosomal protein L13	PF00572: Ribosomal protein L13	IPR005755: Ribosomal protein L13, eukaryotic/archaeal; IPR005822: Ribosomal protein L13; IPR023563: Ribosomal protein L13, conserved site	GO:0003735 MF: structural constituent of ribosome;GO:0005840 CC: ribosome;GO:0006412 BP: translation;GO:0015934 CC: large ribosomal subunit	IPR005755; IPR005822; IPR023563	GO:0003735; GO:0005840; GO:0006412; GO:0015934
Signal transduction	5A_Nb7_K_KNSp_W135_ADVC.AX-108905462	Rainfed	TraesCS5A01G393000.1	Receptor protein kinase, putative	PF08263: Leucine rich repeat N-terminal domain; PF13855: Leucine rich repeat; PF00560: Leucine Rich Repeat; PF00069: Protein kinase domain	IPR000719: Protein kinase domain; IPR001611: Leucine-rich repeat; IPR003591: Leucine-rich repeat, typical subtype; IPR008271: Serine/threonine-protein kinase, active site; IPR011009: Protein kinase-like domain; IPR013210: Leucine-rich repeat-containing N-terminal, plant-type; IPR017441: Protein kinase, ATP binding site; IPR032675: Leucine-rich repeat domain, L domain-like	GO:0004672 MF: protein kinase activity;GO:0005515 MF: protein binding;GO:0005524 MF: ATP binding;GO:0006468 BP: protein phosphorylation	IPR000719; IPR001611; IPR003591; IPR008271; IPR011009; IPR013210; IPR017441; IPR032675	GO:0004672; GO:0005515; GO:0005524; GO:0006468
Redox homeostasis and detoxification	5A_Nb7_K_KNSp_W135_ADVC.AX-108905462	Rainfed	TraesCS5A01G393400.1	RNA polymerase-associated protein LEO1	PF04004: Leo1-like protein	IPR007149: Leo1-like protein	GO:0006368 BP: transcription elongation from RNA polymerase II promoter;GO:0016570 BP: histone modification;GO:0016593 CC: Cdc73/Paf1 complex	IPR007149	GO:0006368; GO:0016570; GO:0016593
Sugar metabolism	5A_Nb7_K_KNSp_W135_ADVC.AX-108905462	Rainfed	TraesCS5A01G393900.1	UDP-glycosyltransferase	PF00201: UDP-glucoronosyl and UDP-glucosyl transferase	IPR002213: UDP-glucuronosyl/UDP-glucosyltransferase	GO:0008152 BP: metabolic process;GO:0016758 MF: transferase activity, transferring hexosyl groups	IPR002213	GO:0008152; GO:0016758
Sugar metabolism	5A_Nb7_K_KNSp_W135_ADVC.AX-108905462	Rainfed	TraesCS5A01G394000.1	UDP-glycosyltransferase	PF00201: UDP-glucoronosyl and UDP-glucosyl transferase	IPR002213: UDP-glucuronosyl/UDP-glucosyltransferase	GO:0008152 BP: metabolic process;GO:0016758 MF: transferase activity, transferring hexosyl groups	IPR002213	GO:0008152; GO:0016758
Sugar metabolism	5A_Nb7_K_KNSp_W135_ADVC.AX-108905462	Rainfed	TraesCS5A01G394100.1	UDP-glycosyltransferase	PF00201: UDP-glucoronosyl and UDP-glucosyl transferase	IPR002213: UDP-glucuronosyl/UDP-glucosyltransferase	GO:0008152 BP: metabolic process;GO:0016758 MF: transferase activity, transferring hexosyl groups	IPR002213	GO:0008152; GO:0016758
Sugar metabolism	5A_Nb7_K_KNSp_W135_ADVC.AX-108905462	Rainfed	TraesCS5A01G394200.1	UDP-glycosyltransferase	PF00201: UDP-glucoronosyl and UDP-glucosyl transferase	IPR002213: UDP-glucuronosyl/UDP-glucosyltransferase	GO:0008152 BP: metabolic process;GO:0016758 MF: transferase activity, transferring hexosyl groups	IPR002213	GO:0008152; GO:0016758
Others	5A_Nb7_K_KNSp_W135_ADVC.AX-108905462	Rainfed	TraesCS5A01G394300.1	GDSL esterase/lipase	PF00657: GDSL-like Lipase/Acylhydrolase	IPR001087: GDSL lipase/esterase; IPR008265: Lipase, GDSL, active site; IPR013830: SGNH hydrolase-type esterase domain	GO:0006629 BP: lipid metabolic process;GO:0016298 MF: lipase activity;GO:0016788 MF: hydrolase activity, acting on ester bonds	IPR001087; IPR008265; IPR013830	GO:0006629; GO:0016298; GO:0016788
Sugar metabolism	5A_Nb7_K_KNSp_W135_ADVC.AX-108905462	Rainfed	TraesCS5A01G394400.1	UDP-glycosyltransferase	PF00201: UDP-glucoronosyl and UDP-glucosyl transferase	IPR002213: UDP-glucuronosyl/UDP-glucosyltransferase	GO:0008152 BP: metabolic process;GO:0016758 MF: transferase activity, transferring hexosyl groups	IPR002213	GO:0008152; GO:0016758
Sugar metabolism	5A_Nb7_K_KNSp_W135_ADVC.AX-108905462	Rainfed	TraesCS5A01G394500.1	UDP-glycosyltransferase	PF00201: UDP-glucoronosyl and UDP-glucosyl transferase	IPR002213: UDP-glucuronosyl/UDP-glucosyltransferase	GO:0008152 BP: metabolic process;GO:0016758 MF: transferase activity, transferring hexosyl groups	IPR002213	GO:0008152; GO:0016758
Sugar metabolism	5A_Nb7_K_KNSp_W135_ADVC.AX-108905462	Rainfed	TraesCS5A01G394700.1	UDP-glycosyltransferase	PF00201: UDP-glucoronosyl and UDP-glucosyl transferase	IPR002213: UDP-glucuronosyl/UDP-glucosyltransferase	GO:0008152 BP: metabolic process;GO:0016758 MF: transferase activity, transferring hexosyl groups	IPR002213	GO:0008152; GO:0016758
Sugar metabolism	5A_Nb7_K_KNSp_W135_ADVC.AX-108905462	Rainfed	TraesCS5A01G394800.1	UDP-glycosyltransferase	PF00201: UDP-glucoronosyl and UDP-glucosyl transferase	IPR002213: UDP-glucuronosyl/UDP-glucosyltransferase	GO:0008152 BP: metabolic process;GO:0016758 MF: transferase activity, transferring hexosyl groups	IPR002213	GO:0008152; GO:0016758
Redox homeostasis and detoxification	5A_Nb7_K_KNSp_W135_ADVC.AX-108905462	Rainfed	TraesCS5A01G394900.1	UDP-glucose 6-dehydrogenase	PF03721: UDP-glucose/GDP-mannose dehydrogenase family, NAD binding domain; PF00984: UDP-glucose/GDP-mannose dehydrogenase family, central domain; PF03720: UDP-glucose/GDP-mannose dehydrogenase family, UDP binding domain	IPR001732: UDP-glucose/GDP-mannose dehydrogenase, N-terminal; IPR008927: 6-phosphogluconate dehydrogenase C-terminal domain-like; IPR014026: UDP-glucose/GDP-mannose dehydrogenase, dimerisation; IPR014027: UDP-glucose/GDP-mannose dehydrogenase, C-terminal; IPR016040: NAD(P)-binding domain; IPR017476: UDP-glucose/GDP-mannose dehydrogenase; IPR028356: UDP-glucose 6-dehydrogenase, eukaryotic type	GO:0003979 MF: UDP-glucose 6-dehydrogenase activity;GO:0016616 MF: oxidoreductase activity, acting on the CH-OH group of donors, NAD or NADP as acceptor;GO:0051287 MF: NAD binding;GO:0055114 BP: oxidation-reduction process	IPR001732; IPR008927; IPR014026; IPR014027; IPR016040; IPR017476; IPR028356	GO:0003979; GO:0016616; GO:0051287; GO:0055114
Transcription factors and translation	5A_Nb7_K_KNSp_W135_ADVC.AX-108905462	Rainfed	TraesCS5A01G395100.1	WRKY transcription factor	PF03106: WRKY DNA -binding domain	IPR003657: WRKY domain	GO:0003700 MF: transcription factor activity, sequence-specific DNA binding;GO:0006355 BP: regulation of transcription, DNA-templated;GO:0043565 MF: sequence-specific DNA binding	IPR003657	GO:0003700; GO:0006355; GO:0043565
Redox homeostasis and detoxification	5B_Nb2_D_PH_W15_AEGH.CAP12_rep_c4520_207	Drought	TraesCS5B01G297600.2	D-amino acid dehydrogenase	PF01266: FAD dependent oxidoreductase	IPR006076: FAD dependent oxidoreductase; IPR023753: FAD/NAD(P)-binding domain	GO:0016491 MF: oxidoreductase activity;GO:0055114 BP: oxidation-reduction process	IPR006076; IPR023753	GO:0016491; GO:0055114
Signal transduction	5B_Nb2_D_PH_W15_AEGH.CAP12_rep_c4520_207	Drought	TraesCS5B01G297700.1	protein kinase family protein	PF00069: Protein kinase domain; PF13499: EF-hand domain pair	IPR000719: Protein kinase domain; IPR002048: EF-hand domain; IPR008271: Serine/threonine-protein kinase, active site; IPR011009: Protein kinase-like domain; IPR011992: EF-hand domain pair; IPR017441: Protein kinase, ATP binding site; IPR018247: EF-Hand 1, calcium-binding site	GO:0004672 MF: protein kinase activity;GO:0005509 MF: calcium ion binding;GO:0005524 MF: ATP binding;GO:0006468 BP: protein phosphorylation	IPR000719; IPR002048; IPR008271; IPR011009; IPR011992; IPR017441; IPR018247	GO:0004672; GO:0005509; GO:0005524; GO:0006468
Others	5B_Nb2_D_PH_W15_AEGH.CAP12_rep_c4520_207	Drought	TraesCS5B01G298200.1	Protein farnesyltransferase/geranylgeranyltransferase type-1 subunit alpha	PF01239: Protein prenyltransferase alpha subunit repeat	IPR002088: Protein prenyltransferase, alpha subunit	GO:0008318 MF: protein prenyltransferase activity;GO:0018342 BP: protein prenylation	IPR002088	GO:0008318; GO:0018342
Others	5B_Nb2_D_PH_W15_AEGH.CAP12_rep_c4520_207	Drought	TraesCS5B01G298400.1	Protein farnesyltransferase/geranylgeranyltransferase type-1 subunit alpha	PF01239: Protein prenyltransferase alpha subunit repeat	IPR002088: Protein prenyltransferase, alpha subunit	GO:0008318 MF: protein prenyltransferase activity;GO:0018342 BP: protein prenylation	IPR002088	GO:0008318; GO:0018342
Redox homeostasis and detoxification	5B_Nb2_D_PH_W15_AEGH.CAP12_rep_c4520_207	Drought	TraesCS5B01G298800.1	Ferredoxin	NA	IPR001041: 2Fe-2S ferredoxin-type iron-sulfur binding domain; IPR012675: Beta-grasp domain	GO:0009055 MF: electron carrier activity;GO:0051536 MF: iron-sulfur cluster binding	IPR001041; IPR012675	GO:0009055; GO:0051536
Redox homeostasis and detoxification	5B_Nb2_D_PH_W15_AEGH.CAP12_rep_c4520_207	Drought	TraesCS5B01G299000.1	Respiratory burst oxidase homolog	PF08414: Respiratory burst NADPH oxidase; PF01794: Ferric reductase like transmembrane component; PF08022: FAD-binding domain; PF08030: Ferric reductase NAD binding domain	IPR000778: Cytochrome b245, heavy chain; IPR002048: EF-hand domain; IPR011992: EF-hand domain pair; IPR013112: FAD-binding 8; IPR013121: Ferric reductase, NAD binding domain; IPR013130: Ferric reductase transmembrane component-like domain; IPR013623: NADPH oxidase Respiratory burst; IPR017927: Ferredoxin reductase-type FAD-binding domain; IPR017938: Riboflavin synthase-like beta-barrel; IPR018247…	GO:0004601 MF: peroxidase activity;GO:0005509 MF: calcium ion binding;GO:0016020 CC: membrane;GO:0016491 MF: oxidoreductase activity;GO:0050664 MF: oxidoreductase activity, acting on NAD(P)H, oxygen as acceptor;GO:0055114 BP: oxidation-reduction process	IPR000778; IPR002048; IPR011992; IPR013112; IPR013121; IPR013130; IPR013623; IPR017927; IPR017938; IPR018247	GO:0004601; GO:0005509; GO:0016020; GO:0016491; GO:0050664; GO:0055114
Antiporter and transmembrane proteins	5B_Nb2_D_PH_W15_AEGH.CAP12_rep_c4520_207	Drought	TraesCS5B01G299100.1	Mitochondrial carrier protein-like	PF00153: Mitochondrial carrier protein	IPR002067: Mitochondrial carrier protein; IPR018108: Mitochondrial substrate/solute carrier; IPR023395: Mitochondrial carrier domain	GO:0055085 BP: transmembrane transport	IPR002067; IPR018108; IPR023395	GO:0055085
Antiporter and transmembrane proteins	5B_Nb2_D_PH_W15_AEGH.CAP12_rep_c4520_207	Drought	TraesCS5B01G299200.1	ATP-dependent zinc metalloprotease FtsH 1	PF09262: Peroxisome biogenesis factor 1, N-terminal; PF00004: ATPase family associated with various cellular activities (AAA)	IPR003593: AAA+ ATPase domain; IPR003959: ATPase, AAA-type, core; IPR003960: ATPase, AAA-type, conserved site; IPR015342: Peroxisome biogenesis factor 1, N-terminal, psi beta-barrel fold; IPR027417: P-loop containing nucleoside triphosphate hydrolase; IPR029067: CDC48 domain 2-like	GO:0005524 MF: ATP binding;GO:0005777 CC: peroxisome;GO:0007031 BP: peroxisome organization	IPR003593; IPR003959; IPR003960; IPR015342; IPR027417; IPR029067	GO:0005524; GO:0005777; GO:0007031
Antiporter and transmembrane proteins	5B_Nb2_D_PH_W15_AEGH.CAP12_rep_c4520_207	Drought	TraesCS5B01G299300.1	ATP-dependent zinc metalloprotease FTSH protein	PF00004: ATPase family associated with various cellular activities (AAA)	IPR003959: ATPase, AAA-type, core; IPR027417: P-loop containing nucleoside triphosphate hydrolase	GO:0005524 MF: ATP binding	IPR003959; IPR027417	GO:0005524
Transcription factors and translation	5B_Nb2_D_PH_W15_AEGH.CAP12_rep_c4520_207	Drought	TraesCS5B01G299400.1	Transcription factor 25	PF04910: Transcriptional repressor TCF25	IPR006994: Transcription factor 25; IPR011990: Tetratricopeptide-like helical domain	GO:0005515 MF: protein binding	IPR006994; IPR011990	GO:0005515
Antiporter and transmembrane proteins	5B_Nb2_D_PH_W15_AEGH.CAP12_rep_c4520_207	Drought	TraesCS5B01G299500.1	ATP-dependent zinc metalloprotease FtsH	PF00004: ATPase family associated with various cellular activities (AAA); PF00439: Bromodomain	IPR001487: Bromodomain; IPR003593: AAA+ ATPase domain; IPR003959: ATPase, AAA-type, core; IPR003960: ATPase, AAA-type, conserved site; IPR018359: Bromodomain, conserved site; IPR027417: P-loop containing nucleoside triphosphate hydrolase	GO:0005515 MF: protein binding;GO:0005524 MF: ATP binding	IPR001487; IPR003593; IPR003959; IPR003960; IPR018359; IPR027417	GO:0005515; GO:0005524
Others	5B_Nb2_D_PH_W15_AEGH.CAP12_rep_c4520_207	Drought	TraesCS5B01G299700.1	Argininosuccinate lyase	NA	IPR008948: L-Aspartase-like; IPR024083: Fumarase/histidase, N-terminal	GO:0003824 MF: catalytic activity	IPR008948; IPR024083	GO:0003824
Others	5B_Nb2_D_PH_W15_AEGH.CAP12_rep_c4520_207	Drought	TraesCS5B01G299900.1	Proteasome subunit beta type	PF00227: Proteasome subunit	IPR001353: Proteasome, subunit alpha/beta; IPR016050: Proteasome beta-type subunit, conserved site; IPR016295: Proteasome endopeptidase complex, beta subunit; IPR023333: Proteasome B-type subunit; IPR029055: Nucleophile aminohydrolases, N-terminal	GO:0004175 MF: endopeptidase activity;GO:0004298 MF: threonine-type endopeptidase activity;GO:0005839 CC: proteasome core complex;GO:0051603 BP: proteolysis involved in cellular protein catabolic process	IPR001353; IPR016050; IPR016295; IPR023333; IPR029055	GO:0004175; GO:0004298; GO:0005839; GO:0051603
Others	5B_Nb2_D_PH_W15_AEGH.CAP12_rep_c4520_207	Drought	TraesCS5B01G300100.1	Trigger factor	PF05697: Bacterial trigger factor protein (TF)	IPR008881: Trigger factor, ribosome-binding, bacterial	GO:0006457 BP: protein folding;GO:0015031 BP: protein transport	IPR008881	GO:0006457; GO:0015031
Antiporter and transmembrane proteins	5B_Nb2_D_PH_W15_AEGH.CAP12_rep_c4520_207	Drought	TraesCS5B01G300200.1	CDGSH iron-sulfur domain-containing protein 2	PF09360: Iron-binding zinc finger CDGSH type	IPR018967: Iron sulphur-containing domain, CDGSH-type	GO:0043231 CC: intracellular membrane-bounded organelle;GO:0051537 MF: 2 iron, 2 sulfur cluster binding	IPR018967	GO:0043231; GO:0051537
Others	5B_Nb2_D_PH_W15_AEGH.CAP12_rep_c4520_207	Drought	TraesCS5B01G300300.2	Mitochondrial carrier protein	PF00153: Mitochondrial carrier protein	IPR002030: Mitochondrial brown fat uncoupling protein; IPR018108: Mitochondrial substrate/solute carrier; IPR023395: Mitochondrial carrier domain	GO:0006839 BP: mitochondrial transport;GO:0031966 CC: mitochondrial membrane	IPR002030; IPR018108; IPR023395	GO:0006839; GO:0031966
Amino Acid Metabolism	5B_Nb2_D_PH_W15_AEGH.CAP12_rep_c4520_207	Drought	TraesCS5B01G300800.1	Cysteine synthase	PF00291: Pyridoxal-phosphate dependent enzyme	IPR001216: Cysteine synthase/cystathionine beta-synthase, pyridoxal-phosphate attachment site; IPR001926: Tryptophan synthase beta subunit-like PLP-dependent enzyme; IPR005856: Cysteine synthase; IPR005859: Cysteine synthase CysK	GO:0004124 MF: cysteine synthase activity;GO:0006535 BP: cysteine biosynthetic process from serine	IPR001216; IPR001926; IPR005856; IPR005859	GO:0004124; GO:0006535
Others	5B_Nb2_D_PH_W15_AEGH.CAP12_rep_c4520_207	Drought	TraesCS5B01G300900.1	Mitochondrial inner membrane protease subunit 1	PF00717: Peptidase S24-like	IPR000223: Peptidase S26A, signal peptidase I; IPR015927: Peptidase S24/S26A/S26B/S26C; IPR019757: Peptidase S26A, signal peptidase I, lysine active site	GO:0006508 BP: proteolysis;GO:0008236 MF: serine-type peptidase activity;GO:0016020 CC: membrane;GO:0016021 CC: integral component of membrane	IPR000223; IPR015927; IPR019757	GO:0006508; GO:0008236; GO:0016020; GO:0016021
Others	5B_Nb2_D_PH_W15_AEGH.CAP12_rep_c4520_207	Drought	TraesCS5B01G301100.2	Katanin p80 WD40 repeat-containing subunit B1 homolog	PF00400: WD domain, G-beta repeat	IPR001680: WD40 repeat; IPR015943: WD40/YVTN repeat-like-containing domain; IPR017986: WD40-repeat-containing domain; IPR019775: WD40 repeat, conserved site	GO:0005515 MF: protein binding	IPR001680; IPR015943; IPR017986; IPR019775	GO:0005515
Others	5B_Nb2_D_PH_W15_AEGH.CAP12_rep_c4520_207	Drought	TraesCS5B01G301300.1	Pentatricopeptide repeat-containing protein	PF01535: PPR repeat; PF13041: PPR repeat family	IPR002885: Pentatricopeptide repeat; IPR011990: Tetratricopeptide-like helical domain	GO:0005515 MF: protein binding	IPR002885; IPR011990	GO:0005515
Stress and defense related proteins/ Chaperone	5B_Nb2_D_PH_W15_AEGH.CAP12_rep_c4520_207	Drought	TraesCS5B01G301400.1	RNA polymerase II transcriptional coactivator	PF02229: Transcriptional Coactivator p15 (PC4)	IPR003173: Transcriptional coactivator p15 (PC4); IPR009044: ssDNA-binding transcriptional regulator	GO:0003677 MF: DNA binding;GO:0003713 MF: transcription coactivator activity;GO:0006355 BP: regulation of transcription, DNA-templated	IPR003173; IPR009044	GO:0003677; GO:0003713; GO:0006355
Stress and defense related proteins/ Chaperone	5B_Nb2_D_PH_W15_AEGH.CAP12_rep_c4520_207	Drought	TraesCS5B01G301500.1	NBS-LRR disease resistance protein, putative, expressed	PF00931: NB-ARC domain	IPR002182: NB-ARC; IPR011991: Winged helix-turn-helix DNA-binding domain; IPR027417: P-loop containing nucleoside triphosphate hydrolase; IPR032675: Leucine-rich repeat domain, L domain-like	GO:0043531 MF: ADP binding	IPR002182; IPR011991; IPR027417; IPR032675	GO:0043531
Others	5B_Nb2_D_PH_W15_AEGH.CAP12_rep_c4520_207	Drought	TraesCS5B01G301600.1	Pentatricopeptide repeat-containing protein	PF13041: PPR repeat family; PF01535: PPR repeat	IPR002885: Pentatricopeptide repeat; IPR011990: Tetratricopeptide-like helical domain	GO:0005515 MF: protein binding	IPR002885; IPR011990	GO:0005515
Redox homeostasis and detoxification	5B_Nb2_D_PH_W15_AEGH.CAP12_rep_c4520_207	Drought	TraesCS5B01G301800.1	Histone H4	PF15511: Centromere kinetochore component CENP-T histone fold	IPR001951: Histone H4; IPR009072: Histone-fold; IPR019809: Histone H4, conserved site	GO:0000786 CC: nucleosome;GO:0003677 MF: DNA binding;GO:0005634 CC: nucleus;GO:0006334 BP: nucleosome assembly;GO:0046982 MF: protein heterodimerization activity	IPR001951; IPR009072; IPR019809	GO:0000786; GO:0003677; GO:0005634; GO:0006334; GO:0046982
Transcription factors and translation	5B_Nb2_D_PH_W15_AEGH.CAP12_rep_c4520_207	Drought	TraesCS5B01G301900.1	Transcription factor	PF00170: bZIP transcription factor	IPR004827: Basic-leucine zipper domain	GO:0003700 MF: transcription factor activity, sequence-specific DNA binding;GO:0006355 BP: regulation of transcription, DNA-templated;GO:0043565 MF: sequence-specific DNA binding	IPR004827	GO:0003700; GO:0006355; GO:0043565
Others	5B_Nb2_D_PH_W15_AEGH.CAP12_rep_c4520_207	Drought	TraesCS5B01G302000.1	RNA binding protein	PF00076: RNA recognition motif. (a.k.a. RRM, RBD, or RNP domain); PF07744: SPOC domain	IPR000504: RNA recognition motif domain; IPR012921: Spen paralogue and orthologue SPOC, C-terminal	GO:0003676 MF: nucleic acid binding	IPR000504; IPR012921	GO:0003676
Osmo-protectant synthesis related protein	5B_Nb2_D_PH_W15_AEGH.CAP12_rep_c4520_207	Drought	TraesCS5B01G302100.1	50S ribosomal protein L10	PF00466: Ribosomal protein L10	IPR001790: Ribosomal protein L10P	GO:0005622 CC: intracellular;GO:0042254 BP: ribosome biogenesis	IPR001790	GO:0005622; GO:0042254
Redox homeostasis and detoxification	5B_Nb2_D_PH_W15_AEGH.CAP12_rep_c4520_207	Drought	TraesCS5B01G302300.2	Reticulon-like protein	PF01073: 3-beta hydroxysteroid dehydrogenase/isomerase family; PF02453: Reticulon	IPR002225: 3-beta hydroxysteroid dehydrogenase/isomerase; IPR003388: Reticulon; IPR016040: NAD(P)-binding domain	GO:0003854 MF: 3-beta-hydroxy-delta5-steroid dehydrogenase activity;GO:0006694 BP: steroid biosynthetic process;GO:0016616 MF: oxidoreductase activity, acting on the CH-OH group of donors, NAD or NADP as acceptor;GO:0055114 BP: oxidation-reduction process	IPR002225; IPR003388; IPR016040	GO:0003854; GO:0006694; GO:0016616; GO:0055114
Others	5B_Nb2_D_PH_W15_AEGH.CAP12_rep_c4520_207	Drought	TraesCS5B01G302400.1	Aspartic proteinase nepenthesin-1	PF14543: Xylanase inhibitor N-terminal; PF14541: Xylanase inhibitor C-terminal	IPR001461: Aspartic peptidase A1 family; IPR001969: Aspartic peptidase, active site; IPR021109: Aspartic peptidase domain; IPR032799: Xylanase inhibitor, C-terminal; IPR032861: Xylanase inhibitor, N-terminal; IPR033121: Peptidase family A1 domain	GO:0004190 MF: aspartic-type endopeptidase activity;GO:0006508 BP: proteolysis	IPR001461; IPR001969; IPR021109; IPR032799; IPR032861; IPR033121	GO:0004190; GO:0006508
Others	5B_Nb2_D_PH_W15_AEGH.CAP12_rep_c4520_207	Drought	TraesCS5B01G302500.1	GDP-mannose-3',5'-epimerase	PF01370: NAD dependent epimerase/dehydratase family	IPR001509: NAD-dependent epimerase/dehydratase; IPR016040: NAD(P)-binding domain	GO:0003824 MF: catalytic activity;GO:0050662 MF: coenzyme binding	IPR001509; IPR016040	GO:0003824; GO:0050662
Redox homeostasis and detoxification	5B_Nb2_D_PH_W15_AEGH.CAP12_rep_c4520_207	Drought	TraesCS5B01G302700.1	FAD-binding Berberine family protein	PF01565: FAD binding domain; PF08031: Berberine and berberine like	IPR006094: FAD linked oxidase, N-terminal; IPR012951: Berberine/berberine-like; IPR016166: FAD-binding, type 2; IPR016167: FAD-binding, type 2, subdomain 1; IPR016169: CO dehydrogenase flavoprotein-like, FAD-binding, subdomain 2	GO:0003824 MF: catalytic activity;GO:0016491 MF: oxidoreductase activity;GO:0016614 MF: oxidoreductase activity, acting on CH-OH group of donors;GO:0050660 MF: flavin adenine dinucleotide binding;GO:0055114 BP: oxidation-reduction process	IPR006094; IPR012951; IPR016166; IPR016167; IPR016169	GO:0003824; GO:0016491; GO:0016614; GO:0050660; GO:0055114
Others	5B_Nb2_D_PH_W15_AEGH.CAP12_rep_c4520_207	Drought	TraesCS5B01G302800.1	Plant/T31B5-30 protein	PF11443: Domain of unknown function (DUF2828)	IPR000878: Tetrapyrrole methylase; IPR024553: Domain of unknown function DUF2828	GO:0008152 BP: metabolic process;GO:0008168 MF: methyltransferase activity	IPR000878; IPR024553	GO:0008152; GO:0008168
Antiporter and transmembrane proteins	5B_Nb2_D_PH_W15_AEGH.CAP12_rep_c4520_207	Drought	TraesCS5B01G303100.1	Hydroxyacylglutathione hydrolase	PF00753: Metallo-beta-lactamase superfamily; PF16123: Hydroxyacylglutathione hydrolase C-terminus	IPR001279: Metallo-beta-lactamase; IPR017782: Hydroxyacylglutathione hydrolase; IPR032282: Hydroxyacylglutathione hydrolase, C-terminal domain	GO:0004416 MF: hydroxyacylglutathione hydrolase activity;GO:0019243 BP: methylglyoxal catabolic process to D-lactate via S-lactoyl-glutathione	IPR001279; IPR017782; IPR032282	GO:0004416; GO:0019243
Redox homeostasis and detoxification	5B_Nb2_D_PH_W15_AEGH.CAP12_rep_c4520_207	Drought	TraesCS5B01G303200.3	Glutathione S-transferase	PF13417: Glutathione S-transferase, N-terminal domain	IPR004045: Glutathione S-transferase, N-terminal; IPR010987: Glutathione S-transferase, C-terminal-like; IPR012336: Thioredoxin-like fold	GO:0005515 MF: protein binding	IPR004045; IPR010987; IPR012336	GO:0005515
Redox homeostasis and detoxification	5B_Nb2_D_PH_W15_AEGH.CAP12_rep_c4520_207	Drought	TraesCS5B01G303300.2	Glutathione S-transferase	PF13417: Glutathione S-transferase, N-terminal domain	IPR004045: Glutathione S-transferase, N-terminal; IPR005955: Glutathione S-transferases, class Zeta; IPR010987: Glutathione S-transferase, C-terminal-like; IPR012336: Thioredoxin-like fold	GO:0003824 MF: catalytic activity;GO:0005515 MF: protein binding;GO:0005737 CC: cytoplasm;GO:0009072 BP: aromatic amino acid family metabolic process	IPR004045; IPR005955; IPR010987; IPR012336	GO:0003824; GO:0005515; GO:0005737; GO:0009072
Others	5B_Nb2_D_PH_W15_AEGH.CAP12_rep_c4520_207	Drought	TraesCS5B01G303500.1	Sister chromatid cohesion 1 protein 3	PF04825: N terminus of Rad21 / Rec8 like protein; PF04824: Conserved region of Rad21 / Rec8 like protein	IPR006909: Rad21/Rec8-like protein, C-terminal, eukaryotic; IPR006910: Rad21/Rec8-like protein, N-terminal; IPR011991: Winged helix-turn-helix DNA-binding domain	GO:0000228 CC: nuclear chromosome;GO:0005515 MF: protein binding	IPR006909; IPR006910; IPR011991	GO:0000228; GO:0005515
Others	5B_Nb2_D_PH_W15_AEGH.CAP12_rep_c4520_207	Drought	TraesCS5B01G303600.1	Sister chromatid cohesion 1 protein 3	PF04825: N terminus of Rad21 / Rec8 like protein; PF04824: Conserved region of Rad21 / Rec8 like protein	IPR006909: Rad21/Rec8-like protein, C-terminal, eukaryotic; IPR006910: Rad21/Rec8-like protein, N-terminal; IPR011991: Winged helix-turn-helix DNA-binding domain	GO:0000228 CC: nuclear chromosome;GO:0005515 MF: protein binding	IPR006909; IPR006910; IPR011991	GO:0000228; GO:0005515
Redox homeostasis and detoxification	5B_Nb2_D_PH_W15_AEGH.CAP12_rep_c4520_207	Drought	TraesCS5B01G303700.1	NADP-dependent alkenal double bond reductase	PF16884: N-terminal domain of oxidoreductase; PF00107: Zinc-binding dehydrogenase	IPR011032: GroES-like; IPR013149: Alcohol dehydrogenase, C-terminal; IPR016040: NAD(P)-binding domain; IPR020843: Polyketide synthase, enoylreductase domain	GO:0016491 MF: oxidoreductase activity;GO:0055114 BP: oxidation-reduction process	IPR011032; IPR013149; IPR016040; IPR020843	GO:0016491; GO:0055114
Redox homeostasis and detoxification	5B_Nb2_D_PH_W15_AEGH.CAP12_rep_c4520_207	Drought	TraesCS5B01G303800.1	NADP-dependent alkenal double bond reductase	PF16884: N-terminal domain of oxidoreductase; PF00107: Zinc-binding dehydrogenase	IPR011032: GroES-like; IPR013149: Alcohol dehydrogenase, C-terminal; IPR016040: NAD(P)-binding domain; IPR020843: Polyketide synthase, enoylreductase domain	GO:0016491 MF: oxidoreductase activity;GO:0055114 BP: oxidation-reduction process	IPR011032; IPR013149; IPR016040; IPR020843	GO:0016491; GO:0055114
Osmo-protectant synthesis related protein	5B_Nb2_D_PH_W15_AEGH.CAP12_rep_c4520_207	Drought	TraesCS5B01G303900.1	Alanine--tRNA ligase	PF01411: tRNA synthetases class II (A)	IPR018164: Alanyl-tRNA synthetase, class IIc, N-terminal	GO:0000166 MF: nucleotide binding;GO:0004813 MF: alanine-tRNA ligase activity;GO:0005524 MF: ATP binding;GO:0006419 BP: alanyl-tRNA aminoacylation	IPR018164	GO:0000166; GO:0004813; GO:0005524; GO:0006419
Signal transduction	5B_Nb2_D_PH_W15_AEGH.CAP12_rep_c4520_207	Drought	TraesCS5B01G304000.2	F-box protein	PF00646: F-box domain	IPR001810: F-box domain; IPR032675: Leucine-rich repeat domain, L domain-like	GO:0005515 MF: protein binding	IPR001810; IPR032675	GO:0005515
Others	5B_Nb2_D_PH_W15_AEGH.CAP12_rep_c4520_207	Drought	TraesCS5B01G304100.1	Ornithine decarboxylase	PF02784: Pyridoxal-dependent decarboxylase, pyridoxal binding domain; PF00278: Pyridoxal-dependent decarboxylase, C-terminal sheet domain	IPR000183: Ornithine/DAP/Arg decarboxylase; IPR002433: Ornithine decarboxylase; IPR009006: Alanine racemase/group IV decarboxylase, C-terminal; IPR022643: Orn/DAP/Arg decarboxylase 2, C-terminal; IPR022644: Orn/DAP/Arg decarboxylase 2, N-terminal; IPR022653: Orn/DAP/Arg decarboxylase 2, pyridoxal-phosphate binding site; IPR029066: PLP-binding barrel	GO:0003824 MF: catalytic activity;GO:0006596 BP: polyamine biosynthetic process	IPR000183; IPR002433; IPR009006; IPR022643; IPR022644; IPR022653; IPR029066	GO:0003824; GO:0006596
Others	5B_Nb2_D_PH_W15_AEGH.CAP12_rep_c4520_207	Drought	TraesCS5B01G304200.1	Ornithine decarboxylase	PF02784: Pyridoxal-dependent decarboxylase, pyridoxal binding domain; PF00278: Pyridoxal-dependent decarboxylase, C-terminal sheet domain	IPR000183: Ornithine/DAP/Arg decarboxylase; IPR002433: Ornithine decarboxylase; IPR009006: Alanine racemase/group IV decarboxylase, C-terminal; IPR022643: Orn/DAP/Arg decarboxylase 2, C-terminal; IPR022644: Orn/DAP/Arg decarboxylase 2, N-terminal; IPR022653: Orn/DAP/Arg decarboxylase 2, pyridoxal-phosphate binding site; IPR029066: PLP-binding barrel	GO:0003824 MF: catalytic activity;GO:0006596 BP: polyamine biosynthetic process	IPR000183; IPR002433; IPR009006; IPR022643; IPR022644; IPR022653; IPR029066	GO:0003824; GO:0006596
Others	5B_Nb2_D_PH_W15_AEGH.CAP12_rep_c4520_207	Drought	TraesCS5B01G304300.1	Agmatine coumaroyltransferase-2	PF02458: Transferase family	IPR003480: Transferase	GO:0016747 MF: transferase activity, transferring acyl groups other than amino-acyl groups	IPR003480	GO:0016747
Others	5B_Nb2_D_PH_W15_AEGH.CAP12_rep_c4520_207	Drought	TraesCS5B01G304400.1	C2 domain-containing protein / GRAM domain-containing protein	PF00168: C2 domain; PF02893: GRAM domain; PF16016: Domain of unknown function (DUF4782)	IPR000008: C2 domain; IPR004182: GRAM domain; IPR031968: VASt domain	GO:0005515 MF: protein binding	IPR000008; IPR004182; IPR031968	GO:0005515
Signal transduction	5B_Nb2_D_PH_W15_AEGH.CAP12_rep_c4520_207	Drought	TraesCS5B01G304500.1	F-box protein	PF00646: F-box domain	IPR001810: F-box domain; IPR032675: Leucine-rich repeat domain, L domain-like	GO:0005515 MF: protein binding	IPR001810; IPR032675	GO:0005515
Signal transduction	5B_Nb2_D_PH_W15_AEGH.CAP12_rep_c4520_207	Drought	TraesCS5B01G304600.1	F-box protein	PF00646: F-box domain	IPR001810: F-box domain; IPR032675: Leucine-rich repeat domain, L domain-like	GO:0005515 MF: protein binding	IPR001810; IPR032675	GO:0005515
Transcription factors and translation	5B_Nb2_D_PH_W15_AEGH.CAP12_rep_c4520_207	Drought	TraesCS5B01G304700.1	Ethylene-responsive transcription factor	PF00847: AP2 domain	IPR001471: AP2/ERF domain; IPR016177: DNA-binding domain	GO:0003677 MF: DNA binding;GO:0003700 MF: transcription factor activity, sequence-specific DNA binding;GO:0006355 BP: regulation of transcription, DNA-templated	IPR001471; IPR016177	GO:0003677; GO:0003700; GO:0006355
Stress and defense related proteins/ Chaperone	5B_Nb2_D_PH_W15_AEGH.CAP12_rep_c4520_207	Drought	TraesCS5B01G304900.1	NBS-LRR disease resistance protein	PF00931: NB-ARC domain	IPR002182: NB-ARC; IPR011991: Winged helix-turn-helix DNA-binding domain; IPR027417: P-loop containing nucleoside triphosphate hydrolase; IPR032675: Leucine-rich repeat domain, L domain-like	GO:0043531 MF: ADP binding	IPR002182; IPR011991; IPR027417; IPR032675	GO:0043531
Signal transduction	5D_Nb1_K_PBW_W135_AJWO.AX-109506123	Rainfed	TraesCS5D01G497600.2	Fructokinase-2	PF00294: pfkB family carbohydrate kinase	IPR002173: Carbohydrate/puine kinase, PfkB, conserved site; IPR011611: Carbohydrate kinase PfkB; IPR029056: Ribokinase-like	GO:0016773 MF: phosphotransferase activity, alcohol group as acceptor	IPR002173; IPR011611; IPR029056	GO:0016773
Others	5D_Nb1_K_PBW_W135_AJWO.AX-109506123	Rainfed	TraesCS5D01G497800.1	Urease subunit alpha	PF00547: Urease, gamma subunit; PF00699: Urease beta subunit; PF00449: Urease alpha-subunit, N-terminal domain; PF01979: Amidohydrolase family	IPR002019: Urease, beta subunit; IPR002026: Urease, gamma/gamma-beta subunit; IPR005848: Urease, alpha subunit; IPR006680: Amidohydrolase-related; IPR011059: Metal-dependent hydrolase, composite domain; IPR011612: Urease alpha-subunit, N-terminal domain; IPR017950: Urease active site; IPR017951: Urease, alpha subunit, C-terminal; IPR029754: Urease nickel binding site; IPR032466: Metal-dependent h…	GO:0006807 BP: nitrogen compound metabolic process;GO:0009039 MF: urease activity;GO:0016151 MF: nickel cation binding;GO:0016787 MF: hydrolase activity;GO:0016810 MF: hydrolase activity, acting on carbon-nitrogen (but not peptide) bonds;GO:0043419 BP: urea catabolic process	IPR002019; IPR002026; IPR005848; IPR006680; IPR011059; IPR011612; IPR017950; IPR017951; IPR029754; IPR032466	GO:0006807; GO:0009039; GO:0016151; GO:0016787; GO:0016810; GO:0043419
Signal transduction	5D_Nb1_K_PBW_W135_AJWO.AX-109506123	Rainfed	TraesCS5D01G497900.1	Receptor lectin kinase	PF00139: Legume lectin domain; PF00069: Protein kinase domain	IPR000719: Protein kinase domain; IPR001220: Legume lectin domain; IPR008271: Serine/threonine-protein kinase, active site; IPR011009: Protein kinase-like domain; IPR013320: Concanavalin A-like lectin/glucanase domain; IPR017441: Protein kinase, ATP binding site; IPR019825: Legume lectin, beta chain, Mn/Ca-binding site	GO:0004672 MF: protein kinase activity;GO:0005524 MF: ATP binding;GO:0006468 BP: protein phosphorylation;GO:0030246 MF: carbohydrate binding	IPR000719; IPR001220; IPR008271; IPR011009; IPR013320; IPR017441; IPR019825	GO:0004672; GO:0005524; GO:0006468; GO:0030246
Signal transduction	5D_Nb1_K_PBW_W135_AJWO.AX-109506123	Rainfed	TraesCS5D01G498100.1	Receptor lectin kinase	PF00139: Legume lectin domain; PF00069: Protein kinase domain	IPR000719: Protein kinase domain; IPR001220: Legume lectin domain; IPR008271: Serine/threonine-protein kinase, active site; IPR011009: Protein kinase-like domain; IPR013320: Concanavalin A-like lectin/glucanase domain; IPR017441: Protein kinase, ATP binding site	GO:0004672 MF: protein kinase activity;GO:0005524 MF: ATP binding;GO:0006468 BP: protein phosphorylation;GO:0030246 MF: carbohydrate binding	IPR000719; IPR001220; IPR008271; IPR011009; IPR013320; IPR017441	GO:0004672; GO:0005524; GO:0006468; GO:0030246
Antiporter and transmembrane proteins	5D_Nb1_K_PBW_W135_AJWO.AX-109506123	Rainfed	TraesCS5D01G498200.1	Sugar transporter family protein, putative, expressed	PF00083: Sugar (and other) transporter	IPR003663: Sugar/inositol transporter; IPR005828: Major facilitator, sugar transporter-like; IPR005829: Sugar transporter, conserved site; IPR020846: Major facilitator superfamily domain	GO:0005215 MF: transporter activity;GO:0016020 CC: membrane;GO:0016021 CC: integral component of membrane;GO:0022857 MF: transmembrane transporter activity;GO:0022891 MF: substrate-specific transmembrane transporter activity;GO:0055085 BP: transmembrane transport	IPR003663; IPR005828; IPR005829; IPR020846	GO:0005215; GO:0016020; GO:0016021; GO:0022857; GO:0022891; GO:0055085
Others	5D_Nb1_K_PBW_W135_AJWO.AX-109506123	Rainfed	TraesCS5D01G498300.1	Trypsin inhibitor	PF00228: Bowman-Birk serine protease inhibitor family	IPR000877: Proteinase inhibitor I12, Bowman-Birk	GO:0004867 MF: serine-type endopeptidase inhibitor activity;GO:0005576 CC: extracellular region	IPR000877	GO:0004867; GO:0005576
Others	5D_Nb1_K_PBW_W135_AJWO.AX-109506123	Rainfed	TraesCS5D01G498500.1	Protein NRT1/ PTR FAMILY 5.5	PF00854: POT family	IPR000109: Proton-dependent oligopeptide transporter family; IPR018456: PTR2 family proton/oligopeptide symporter, conserved site; IPR020846: Major facilitator superfamily domain	GO:0005215 MF: transporter activity;GO:0006810 BP: transport;GO:0006857 BP: oligopeptide transport;GO:0016020 CC: membrane	IPR000109; IPR018456; IPR020846	GO:0005215; GO:0006810; GO:0006857; GO:0016020
Antiporter and transmembrane proteins	5D_Nb1_K_PBW_W135_AJWO.AX-109506123	Rainfed	TraesCS5D01G498600.1	Ras-related protein, expressed	PF00071: Ras family	IPR001806: Small GTPase superfamily; IPR005225: Small GTP-binding protein domain; IPR027417: P-loop containing nucleoside triphosphate hydrolase	GO:0003924 MF: GTPase activity;GO:0005525 MF: GTP binding	IPR001806; IPR005225; IPR027417	GO:0003924; GO:0005525
Others	5D_Nb1_K_PBW_W135_AJWO.AX-109506123	Rainfed	TraesCS5D01G498700.1	Protein NRT1/ PTR FAMILY 5.5	PF00854: POT family	IPR000109: Proton-dependent oligopeptide transporter family; IPR018456: PTR2 family proton/oligopeptide symporter, conserved site; IPR020846: Major facilitator superfamily domain	GO:0005215 MF: transporter activity;GO:0006810 BP: transport;GO:0006857 BP: oligopeptide transport;GO:0016020 CC: membrane	IPR000109; IPR018456; IPR020846	GO:0005215; GO:0006810; GO:0006857; GO:0016020
Others	5D_Nb1_K_PBW_W135_AJWO.AX-109506123	Rainfed	TraesCS5D01G498800.1	Protein NRT1/ PTR FAMILY 5.5	PF00854: POT family	IPR000109: Proton-dependent oligopeptide transporter family; IPR018456: PTR2 family proton/oligopeptide symporter, conserved site; IPR020846: Major facilitator superfamily domain	GO:0005215 MF: transporter activity;GO:0006810 BP: transport;GO:0006857 BP: oligopeptide transport;GO:0016020 CC: membrane	IPR000109; IPR018456; IPR020846	GO:0005215; GO:0006810; GO:0006857; GO:0016020
Others	5D_Nb1_K_PBW_W135_AJWO.AX-109506123	Rainfed	TraesCS5D01G498900.1	DNA-directed RNA polymerase subunit	PF04997: RNA polymerase Rpb1, domain 1; PF00623: RNA polymerase Rpb1, domain 2; PF04983: RNA polymerase Rpb1, domain 3; PF05000: RNA polymerase Rpb1, domain 4; PF04998: RNA polymerase Rpb1, domain 5; PF04992: RNA polymerase Rpb1, domain 6; PF04990: RNA polymerase Rpb1, domain 7	IPR000684: RNA polymerase II, heptapeptide repeat, eukaryotic; IPR000722: RNA polymerase, alpha subunit; IPR006592: RNA polymerase, N-terminal; IPR007066: RNA polymerase Rpb1, domain 3; IPR007073: RNA polymerase Rpb1, domain 7; IPR007075: RNA polymerase Rpb1, domain 6; IPR007080: RNA polymerase Rpb1, domain 1; IPR007081: RNA polymerase Rpb1, domain 5; IPR007083: RNA polymerase Rpb1, domain 4	GO:0003677 MF: DNA binding;GO:0003899 MF: DNA-directed 5'-3' RNA polymerase activity;GO:0005665 CC: DNA-directed RNA polymerase II, core complex;GO:0006351 BP: transcription, DNA-templated;GO:0006366 BP: transcription from RNA polymerase II promoter	IPR000684; IPR000722; IPR006592; IPR007066; IPR007073; IPR007075; IPR007080; IPR007081; IPR007083	GO:0003677; GO:0003899; GO:0005665; GO:0006351; GO:0006366
Others	5D_Nb1_K_PBW_W135_AJWO.AX-109506123	Rainfed	TraesCS5D01G499000.1	DNA-directed RNA polymerase subunit	PF04997: RNA polymerase Rpb1, domain 1; PF00623: RNA polymerase Rpb1, domain 2; PF04983: RNA polymerase Rpb1, domain 3; PF05000: RNA polymerase Rpb1, domain 4; PF04998: RNA polymerase Rpb1, domain 5; PF04992: RNA polymerase Rpb1, domain 6; PF04990: RNA polymerase Rpb1, domain 7	IPR000684: RNA polymerase II, heptapeptide repeat, eukaryotic; IPR000722: RNA polymerase, alpha subunit; IPR006592: RNA polymerase, N-terminal; IPR007066: RNA polymerase Rpb1, domain 3; IPR007073: RNA polymerase Rpb1, domain 7; IPR007075: RNA polymerase Rpb1, domain 6; IPR007080: RNA polymerase Rpb1, domain 1; IPR007081: RNA polymerase Rpb1, domain 5; IPR007083: RNA polymerase Rpb1, domain 4	GO:0003677 MF: DNA binding;GO:0003899 MF: DNA-directed 5'-3' RNA polymerase activity;GO:0005665 CC: DNA-directed RNA polymerase II, core complex;GO:0006351 BP: transcription, DNA-templated;GO:0006366 BP: transcription from RNA polymerase II promoter	IPR000684; IPR000722; IPR006592; IPR007066; IPR007073; IPR007075; IPR007080; IPR007081; IPR007083	GO:0003677; GO:0003899; GO:0005665; GO:0006351; GO:0006366
Antiporter and transmembrane proteins	5D_Nb1_K_PBW_W135_AJWO.AX-109506123	Rainfed	TraesCS5D01G499100.1	Nucleobase ascorbate transporter	PF00860: Permease family	IPR006043: Xanthine/uracil/vitamin C permease	GO:0005215 MF: transporter activity;GO:0006810 BP: transport;GO:0016020 CC: membrane;GO:0055085 BP: transmembrane transport	IPR006043	GO:0005215; GO:0006810; GO:0016020; GO:0055085
Stress and defense related proteins/ Chaperone	5D_Nb1_K_PBW_W135_AJWO.AX-109506123	Rainfed	TraesCS5D01G499200.1	NBS-LRR disease resistance protein	PF00931: NB-ARC domain	IPR002182: NB-ARC; IPR011991: Winged helix-turn-helix DNA-binding domain; IPR027417: P-loop containing nucleoside triphosphate hydrolase; IPR032675: Leucine-rich repeat domain, L domain-like	GO:0043531 MF: ADP binding	IPR002182; IPR011991; IPR027417; IPR032675	GO:0043531
Stress and defense related proteins/ Chaperone	5D_Nb1_K_PBW_W135_AJWO.AX-109506123	Rainfed	TraesCS5D01G499400.1	NBS-LRR disease resistance protein	PF00931: NB-ARC domain	IPR002182: NB-ARC; IPR011991: Winged helix-turn-helix DNA-binding domain; IPR027417: P-loop containing nucleoside triphosphate hydrolase; IPR032675: Leucine-rich repeat domain, L domain-like	GO:0043531 MF: ADP binding	IPR002182; IPR011991; IPR027417; IPR032675	GO:0043531
Stress and defense related proteins/ Chaperone	5D_Nb1_K_PBW_W135_AJWO.AX-109506123	Rainfed	TraesCS5D01G499600.1	Disease resistance protein (NBS-LRR class) family	PF00931: NB-ARC domain	IPR002182: NB-ARC; IPR011991: Winged helix-turn-helix DNA-binding domain; IPR027417: P-loop containing nucleoside triphosphate hydrolase	GO:0043531 MF: ADP binding	IPR002182; IPR011991; IPR027417	GO:0043531
Others	5D_Nb5_D_GSC_W15_ACEB.BS00073116_51	Drought	TraesCS5D01G528600.1	O-methyltransferase	PF08100: Dimerisation domain; PF00891: O-methyltransferase	IPR001077: O-methyltransferase, family 2; IPR011991: Winged helix-turn-helix DNA-binding domain; IPR012967: Plant methyltransferase dimerisation; IPR016461: O-methyltransferase COMT-type; IPR029063: S-adenosyl-L-methionine-dependent methyltransferase	GO:0008168 MF: methyltransferase activity;GO:0008171 MF: O-methyltransferase activity;GO:0046983 MF: protein dimerization activity	IPR001077; IPR011991; IPR012967; IPR016461; IPR029063	GO:0008168; GO:0008171; GO:0046983
Others	5D_Nb5_D_GSC_W15_ACEB.BS00073116_51	Drought	TraesCS5D01G528700.1	GrpE protein homolog	PF00646: F-box domain	IPR001810: F-box domain	GO:0005515 MF: protein binding	IPR001810	GO:0005515
Redox homeostasis and detoxification	5D_Nb5_D_GSC_W15_ACEB.BS00073116_51	Drought	TraesCS5D01G529200.1	Short-chain dehydrogenase/reductase family protein	PF00106: short chain dehydrogenase	IPR002347: Short-chain dehydrogenase/reductase SDR; IPR016040: NAD(P)-binding domain; IPR020904: Short-chain dehydrogenase/reductase, conserved site	GO:0016491 MF: oxidoreductase activity	IPR002347; IPR016040; IPR020904	GO:0016491
Others	5D_Nb5_D_GSC_W15_ACEB.BS00073116_51	Drought	TraesCS5D01G529300.1	Ulp1 protease family, carboxy-terminal domain protein	PF02902: Ulp1 protease family, C-terminal catalytic domain	IPR003653: Ulp1 protease family, C-terminal catalytic domain	GO:0006508 BP: proteolysis;GO:0008234 MF: cysteine-type peptidase activity	IPR003653	GO:0006508; GO:0008234
Antiporter and transmembrane proteins	5D_Nb5_D_GSC_W15_ACEB.BS00073116_51	Drought	TraesCS5D01G529500.1	Ras-related protein, expressed	PF00071: Ras family	IPR001806: Small GTPase superfamily; IPR005225: Small GTP-binding protein domain; IPR027417: P-loop containing nucleoside triphosphate hydrolase	GO:0003924 MF: GTPase activity;GO:0005525 MF: GTP binding	IPR001806; IPR005225; IPR027417	GO:0003924; GO:0005525
Stress and defense related proteins/ Chaperone	5D_Nb5_D_GSC_W15_ACEB.BS00073116_51	Drought	TraesCS5D01G529700.1	Late embryogenesis abundant protein Lea14	PF03168: Late embryogenesis abundant protein	IPR004864: Late embryogenesis abundant protein, LEA-14; IPR013783: Immunoglobulin-like fold; IPR013990: Water stress and hypersensitive response domain	GO:0009269 BP: response to desiccation	IPR004864; IPR013783; IPR013990	GO:0009269
Sugar metabolism	5D_Nb5_D_GSC_W15_ACEB.BS00073116_51	Drought	TraesCS5D01G529800.1	Protein O-linked-mannose beta-1,4-N-acetylglucosaminyltransferase 2	PF04577: Protein of unknown function (DUF563)	IPR007657: Glycosyltransferase 61	GO:0016757 MF: transferase activity, transferring glycosyl groups	IPR007657	GO:0016757
Redox homeostasis and detoxification	5D_Nb5_D_GSC_W15_ACEB.BS00073116_51	Drought	TraesCS5D01G530100.1	Tropinone reductase-like protein	PF13561: Enoyl-(Acyl carrier protein) reductase	IPR002347: Short-chain dehydrogenase/reductase SDR; IPR016040: NAD(P)-binding domain; IPR020904: Short-chain dehydrogenase/reductase, conserved site	GO:0016491 MF: oxidoreductase activity	IPR002347; IPR016040; IPR020904	GO:0016491
Redox homeostasis and detoxification	5D_Nb5_D_GSC_W15_ACEB.BS00073116_51	Drought	TraesCS5D01G530200.1	30S ribosomal protein S6	PF01250: Ribosomal protein S6	IPR000529: Ribosomal protein S6; IPR014717: Translation elongation factor EF1B/ribosomal protein S6; IPR020814: Ribosomal protein S6, plastid/chloroplast	GO:0003735 MF: structural constituent of ribosome;GO:0005840 CC: ribosome;GO:0006412 BP: translation;GO:0019843 MF: rRNA binding	IPR000529; IPR014717; IPR020814	GO:0003735; GO:0005840; GO:0006412; GO:0019843
Others	5D_Nb5_D_GSC_W15_ACEB.BS00073116_51	Drought	TraesCS5D01G530300.1	Luc7-like protein	PF03194: LUC7 N_terminus	IPR004882: Luc7-related	GO:0003729 MF: mRNA binding;GO:0005685 CC: U1 snRNP;GO:0006376 BP: mRNA splice site selection	IPR004882	GO:0003729; GO:0005685; GO:0006376
Signal transduction	5D_Nb5_D_GSC_W15_ACEB.BS00073116_51	Drought	TraesCS5D01G530600.1	Serine/threonine-protein kinase	PF01453: D-mannose binding lectin; PF00954: S-locus glycoprotein domain; PF00069: Protein kinase domain	IPR000719: Protein kinase domain; IPR000742: EGF-like domain; IPR000858: S-locus glycoprotein domain; IPR001480: Bulb-type lectin domain; IPR003609: PAN/Apple domain; IPR008271: Serine/threonine-protein kinase, active site; IPR011009: Protein kinase-like domain; IPR017441: Protein kinase, ATP binding site; IPR024171: S-receptor-like serine/threonine-protein kinase	GO:0004672 MF: protein kinase activity;GO:0004674 MF: protein serine/threonine kinase activity;GO:0005515 MF: protein binding;GO:0005524 MF: ATP binding;GO:0006468 BP: protein phosphorylation;GO:0048544 BP: recognition of pollen	IPR000719; IPR000742; IPR000858; IPR001480; IPR003609; IPR008271; IPR011009; IPR017441; IPR024171	GO:0004672; GO:0004674; GO:0005515; GO:0005524; GO:0006468; GO:0048544
Others	5D_Nb5_D_GSC_W15_ACEB.BS00073116_51	Drought	TraesCS5D01G530800.1	Thiopurine S-methyltransferase family protein, expressed	PF05724: Thiopurine S-methyltransferase (TPMT)	IPR008854: TPMT family; IPR029063: S-adenosyl-L-methionine-dependent methyltransferase	GO:0008757 MF: S-adenosylmethionine-dependent methyltransferase activity	IPR008854; IPR029063	GO:0008757
Others	5D_Nb5_D_GSC_W15_ACEB.BS00073116_51	Drought	TraesCS5D01G530900.1	Poly(ADP-ribose) glycohydrolase 1	PF05028: Poly (ADP-ribose) glycohydrolase (PARG)	IPR007724: Poly(ADP-ribose) glycohydrolase	GO:0004649 MF: poly(ADP-ribose) glycohydrolase activity;GO:0005975 BP: carbohydrate metabolic process	IPR007724	GO:0004649; GO:0005975
Antiporter and transmembrane proteins	5D_Nb5_D_GSC_W15_ACEB.BS00073116_51	Drought	TraesCS5D01G531000.1	Pentatricopeptide repeat-containing protein	PF13041: PPR repeat family; PF01535: PPR repeat; PF14432: DYW family of nucleic acid deaminases	IPR002885: Pentatricopeptide repeat; IPR011990: Tetratricopeptide-like helical domain; IPR032867: DYW domain	GO:0005515 MF: protein binding;GO:0008270 MF: zinc ion binding	IPR002885; IPR011990; IPR032867	GO:0005515; GO:0008270
Signal transduction	5D_Nb5_D_GSC_W15_ACEB.BS00073116_51	Drought	TraesCS5D01G531200.1	Protein kinase-like protein	PF07714: Protein tyrosine kinase	IPR000719: Protein kinase domain; IPR001245: Serine-threonine/tyrosine-protein kinase, catalytic domain; IPR008266: Tyrosine-protein kinase, active site; IPR011009: Protein kinase-like domain; IPR017441: Protein kinase, ATP binding site; IPR020635: Tyrosine-protein kinase, catalytic domain	GO:0004672 MF: protein kinase activity;GO:0004713 MF: protein tyrosine kinase activity;GO:0005524 MF: ATP binding;GO:0006468 BP: protein phosphorylation	IPR000719; IPR001245; IPR008266; IPR011009; IPR017441; IPR020635	GO:0004672; GO:0004713; GO:0005524; GO:0006468
Stress and defense related proteins/ Chaperone	5D_Nb5_D_GSC_W15_ACEB.BS00073116_51	Drought	TraesCS5D01G531300.1	Serine/threonine protein phosphatase 2A regulatory subunit B	PF01603: Protein phosphatase 2A regulatory B subunit (B56 family)	IPR002554: Protein phosphatase 2A, regulatory B subunit, B56; IPR011989: Armadillo-like helical; IPR016024: Armadillo-type fold	GO:0000159 CC: protein phosphatase type 2A complex;GO:0005488 MF: binding;GO:0007165 BP: signal transduction;GO:0019888 MF: protein phosphatase regulator activity	IPR002554; IPR011989; IPR016024	GO:0000159; GO:0005488; GO:0007165; GO:0019888
Others	5D_Nb5_D_GSC_W15_ACEB.BS00073116_51	Drought	TraesCS5D01G531400.1	GDSL esterase/lipase	PF00657: GDSL-like Lipase/Acylhydrolase	IPR001087: GDSL lipase/esterase; IPR013830: SGNH hydrolase-type esterase domain	GO:0016788 MF: hydrolase activity, acting on ester bonds	IPR001087; IPR013830	GO:0016788
Others	5D_Nb5_D_GSC_W15_ACEB.BS00073116_51	Drought	TraesCS5D01G531600.2	Membrane protein insertase YidC	PF02096: 60Kd inner membrane protein	IPR001708: Membrane insertase OXA1/ALB3/YidC; IPR028055: Membrane insertase YidC/Oxa1, C-terminal	GO:0016021 CC: integral component of membrane;GO:0051205 BP: protein insertion into membrane	IPR001708; IPR028055	GO:0016021; GO:0051205
Antiporter and transmembrane proteins	5D_Nb5_D_GSC_W15_ACEB.BS00073116_51	Drought	TraesCS5D01G531700.1	Amino acid transporter, putative	PF13520: Amino acid permease	IPR002293: Amino acid/polyamine transporter I	GO:0003333 BP: amino acid transmembrane transport;GO:0015171 MF: amino acid transmembrane transporter activity;GO:0016020 CC: membrane	IPR002293	GO:0003333; GO:0015171; GO:0016020
Redox homeostasis and detoxification	7A_Nb2_D_GY_W15_ALYA.RAC875_c75528_355	Drought	TraesCS7A01G123400.1	F-box protein	PF00646: F-box domain	IPR001810: F-box domain; IPR011042: Six-bladed beta-propeller, TolB-like; IPR011044: Quinoprotein amine dehydrogenase, beta chain-like; IPR017451: F-box associated interaction domain	GO:0005515 MF: protein binding	IPR001810; IPR011042; IPR011044; IPR017451	GO:0005515
Signal transduction	7A_Nb2_D_GY_W15_ALYA.RAC875_c75528_355	Drought	TraesCS7A01G123500.1	F-box protein	PF00646: F-box domain	IPR001810: F-box domain; IPR017451: F-box associated interaction domain	GO:0005515 MF: protein binding	IPR001810; IPR017451	GO:0005515
Signal transduction	7A_Nb2_D_GY_W15_ALYA.RAC875_c75528_355	Drought	TraesCS7A01G123600.1	F-box protein	PF00646: F-box domain	IPR001810: F-box domain; IPR017451: F-box associated interaction domain	GO:0005515 MF: protein binding	IPR001810; IPR017451	GO:0005515
Sugar metabolism	7B_Nb17_D_SDW_W135_AIDF.AX-109411217	Drought	TraesCS7B01G267800.2	Beta-glucosidase	PF00232: Glycosyl hydrolase family 1	IPR001360: Glycoside hydrolase family 1; IPR017853: Glycoside hydrolase superfamily; IPR033132: Glycosyl hydrolases family 1, N-terminal conserved site	GO:0004553 MF: hydrolase activity, hydrolyzing O-glycosyl compounds;GO:0005975 BP: carbohydrate metabolic process	IPR001360; IPR017853; IPR033132	GO:0004553; GO:0005975
Signal transduction	7B_Nb17_D_SDW_W135_AIDF.AX-109411217	Drought	TraesCS7B01G267900.1	Receptor-like kinase	PF13855: Leucine rich repeat; PF07714: Protein tyrosine kinase	IPR000719: Protein kinase domain; IPR001245: Serine-threonine/tyrosine-protein kinase, catalytic domain; IPR001611: Leucine-rich repeat; IPR011009: Protein kinase-like domain; IPR032675: Leucine-rich repeat domain, L domain-like	GO:0004672 MF: protein kinase activity;GO:0005515 MF: protein binding;GO:0005524 MF: ATP binding;GO:0006468 BP: protein phosphorylation	IPR000719; IPR001245; IPR001611; IPR011009; IPR032675	GO:0004672; GO:0005515; GO:0005524; GO:0006468
Others	7B_Nb17_D_SDW_W135_AIDF.AX-109411217	Drought	TraesCS7B01G268300.1	O-acyltransferase	PF03062: MBOAT, membrane-bound O-acyltransferase family	IPR004299: Membrane bound O-acyl transferase, MBOAT; IPR014371: Sterol O-acyltransferase, ACAT/DAG/ARE types; IPR027251: Diacylglycerol O-acyltransferase 1	GO:0004144 MF: diacylglycerol O-acyltransferase activity;GO:0008374 MF: O-acyltransferase activity;GO:0019432 BP: triglyceride biosynthetic process	IPR004299; IPR014371; IPR027251	GO:0004144; GO:0008374; GO:0019432
Redox homeostasis and detoxification	7B_Nb17_D_SDW_W135_AIDF.AX-109411217	Drought	TraesCS7B01G268400.1	Reductase 1	PF00248: Aldo/keto reductase family	IPR018170: Aldo/keto reductase, conserved site; IPR020471: Aldo/keto reductase; IPR023210: NADP-dependent oxidoreductase domain	GO:0016491 MF: oxidoreductase activity;GO:0055114 BP: oxidation-reduction process	IPR018170; IPR020471; IPR023210	GO:0016491; GO:0055114
Stress and defense related proteins/ Chaperone	7B_Nb17_D_SDW_W135_AIDF.AX-109411217	Drought	TraesCS7B01G268500.1	NBS-LRR-like resistance protein	PF00931: NB-ARC domain	IPR002182: NB-ARC; IPR011991: Winged helix-turn-helix DNA-binding domain; IPR027417: P-loop containing nucleoside triphosphate hydrolase; IPR032675: Leucine-rich repeat domain, L domain-like	GO:0043531 MF: ADP binding	IPR002182; IPR011991; IPR027417; IPR032675	GO:0043531
Signal transduction	7B_Nb17_D_SDW_W135_AIDF.AX-109411217	Drought	TraesCS7B01G268600.1	F-box protein	PF00646: F-box domain	IPR001810: F-box domain	GO:0005515 MF: protein binding	IPR001810	GO:0005515
Stress and defense related proteins/ Chaperone	7B_Nb17_D_SDW_W135_AIDF.AX-109411217	Drought	TraesCS7B01G268700.1	Serine/threonine-protein phosphatase 2A 55 kDa regulatory subunit B	PF00400: WD domain, G-beta repeat	IPR000009: Protein phosphatase 2A regulatory subunit PR55; IPR001680: WD40 repeat; IPR015943: WD40/YVTN repeat-like-containing domain; IPR017986: WD40-repeat-containing domain; IPR018067: Protein phosphatase 2A regulatory subunit PR55, conserved site	GO:0000159 CC: protein phosphatase type 2A complex;GO:0005515 MF: protein binding;GO:0019888 MF: protein phosphatase regulator activity	IPR000009; IPR001680; IPR015943; IPR017986; IPR018067	GO:0000159; GO:0005515; GO:0019888
Others	7B_Nb17_D_SDW_W135_AIDF.AX-109411217	Drought	TraesCS7B01G268800.1	Werner syndrome-like exonuclease	PF01612: 3'-5' exonuclease	IPR002562: 3'-5' exonuclease domain; IPR012337: Ribonuclease H-like domain	GO:0003676 MF: nucleic acid binding;GO:0006139 BP: nucleobase-containing compound metabolic process;GO:0008408 MF: 3'-5' exonuclease activity	IPR002562; IPR012337	GO:0003676; GO:0006139; GO:0008408
Plant hormone response	7B_Nb17_D_SDW_W135_AIDF.AX-109411217	Drought	TraesCS7B01G269000.5	Cell division cycle and apoptosis regulator protein 1	PF14443: DBC1	IPR002048: EF-hand domain; IPR011992: EF-hand domain pair; IPR025954: DBC1/CARP1 catalytically inactive NUDIX hydrolase domain	GO:0005509 MF: calcium ion binding	IPR002048; IPR011992; IPR025954	GO:0005509
Others	7B_Nb17_D_SDW_W135_AIDF.AX-109411217	Drought	TraesCS7B01G269200.1	Protein Mei2	PF04059: RNA recognition motif 2	IPR000504: RNA recognition motif domain; IPR007201: Mei2/Mei2-like, C-terminal RNA recognition motif	GO:0003676 MF: nucleic acid binding	IPR000504; IPR007201	GO:0003676
Stress and defense related proteins/ Chaperone	7B_Nb17_D_SDW_W135_AIDF.AX-109411217	Drought	TraesCS7B01G269300.2	T-complex protein 1 subunit epsilon	PF00118: TCP-1/cpn60 chaperonin family	IPR002194: Chaperonin TCP-1, conserved site; IPR002423: Chaperonin Cpn60/TCP-1 family; IPR012718: T-complex protein 1, epsilon subunit; IPR017998: Chaperone tailless complex polypeptide 1 (TCP-1); IPR027409: GroEL-like apical domain; IPR027413: GroEL-like equatorial domain	GO:0005524 MF: ATP binding;GO:0006457 BP: protein folding;GO:0051082 MF: unfolded protein binding	IPR002194; IPR002423; IPR012718; IPR017998; IPR027409; IPR027413	GO:0005524; GO:0006457; GO:0051082
Others	7B_Nb17_D_SDW_W135_AIDF.AX-109411217	Drought	TraesCS7B01G269400.1	Homeobox protein bel1-like protein	PF07526: Associated with HOX; PF05920: Homeobox KN domain	IPR001356: Homeobox domain; IPR006563: POX domain; IPR008422: Homeobox KN domain; IPR009057: Homeobox domain-like	GO:0003677 MF: DNA binding;GO:0006355 BP: regulation of transcription, DNA-templated	IPR001356; IPR006563; IPR008422; IPR009057	GO:0003677; GO:0006355
Others	7B_Nb17_D_SDW_W135_AIDF.AX-109411217	Drought	TraesCS7B01G269500.1	B3 domain-containing protein family	PF02362: B3 DNA binding domain	IPR003340: B3 DNA binding domain; IPR015300: DNA-binding pseudobarrel domain	GO:0003677 MF: DNA binding	IPR003340; IPR015300	GO:0003677
Antiporter and transmembrane proteins	7B_Nb17_D_SDW_W135_AIDF.AX-109411217	Drought	TraesCS7B01G269700.1	ABC transporter-like family-protein	PF00664: ABC transporter transmembrane region; PF00005: ABC transporter	IPR003439: ABC transporter-like; IPR003593: AAA+ ATPase domain; IPR011527: ABC transporter type 1, transmembrane domain; IPR017871: ABC transporter, conserved site; IPR027417: P-loop containing nucleoside triphosphate hydrolase	GO:0005524 MF: ATP binding;GO:0006810 BP: transport;GO:0016021 CC: integral component of membrane;GO:0016887 MF: ATPase activity;GO:0042626 MF: ATPase activity, coupled to transmembrane movement of substances;GO:0055085 BP: transmembrane transport	IPR003439; IPR003593; IPR011527; IPR017871; IPR027417	GO:0005524; GO:0006810; GO:0016021; GO:0016887; GO:0042626; GO:0055085
Antiporter and transmembrane proteins	7B_Nb17_D_SDW_W135_AIDF.AX-109411217	Drought	TraesCS7B01G269800.1	Potassium efflux antiporter	PF00999: Sodium/hydrogen exchanger family	IPR006153: Cation/H+ exchanger	GO:0006812 BP: cation transport;GO:0015299 MF: solute:proton antiporter activity;GO:0016021 CC: integral component of membrane;GO:0055085 BP: transmembrane transport	IPR006153	GO:0006812; GO:0015299; GO:0016021; GO:0055085
Redox homeostasis and detoxification	7B_Nb17_D_SDW_W135_AIDF.AX-109411217	Drought	TraesCS7B01G269900.1	Inositol oxygenase	PF05153: Myo-inositol oxygenase	IPR007828: Inositol oxygenase	GO:0005506 MF: iron ion binding;GO:0005737 CC: cytoplasm;GO:0019310 BP: inositol catabolic process;GO:0050113 MF: inositol oxygenase activity;GO:0055114 BP: oxidation-reduction process	IPR007828	GO:0005506; GO:0005737; GO:0019310; GO:0050113; GO:0055114
Others	7B_Nb17_D_SDW_W135_AIDF.AX-109411217	Drought	TraesCS7B01G270000.1	GDSL esterase/lipase	PF00657: GDSL-like Lipase/Acylhydrolase	IPR001087: GDSL lipase/esterase	GO:0016788 MF: hydrolase activity, acting on ester bonds	IPR001087	GO:0016788
Others	7B_Nb17_D_SDW_W135_AIDF.AX-109411217	Drought	TraesCS7B01G270300.1	NAC domain protein	PF02365: No apical meristem (NAM) protein	IPR003441: NAC domain	GO:0003677 MF: DNA binding;GO:0006355 BP: regulation of transcription, DNA-templated	IPR003441	GO:0003677; GO:0006355
Antiporter and transmembrane proteins	7B_Nb17_D_SDW_W135_AIDF.AX-109411217	Drought	TraesCS7B01G270400.1	Solute carrier family 40 member 1	PF06963: Ferroportin1 (FPN1)	IPR009716: Ferroporti-1; IPR020846: Major facilitator superfamily domain	GO:0005381 MF: iron ion transmembrane transporter activity;GO:0016021 CC: integral component of membrane;GO:0034755 BP: iron ion transmembrane transport	IPR009716; IPR020846	GO:0005381; GO:0016021; GO:0034755
Others	7B_Nb17_D_SDW_W135_AIDF.AX-109411217	Drought	TraesCS7B01G270600.4	Poly(A) polymerase	PF04928: Poly(A) polymerase central domain; PF01909: Nucleotidyltransferase domain; PF04926: Poly(A) polymerase predicted RNA binding domain	IPR002934: Polymerase, nucleotidyl transferase domain; IPR007010: Poly(A) polymerase, RNA-binding domain; IPR007012: Poly(A) polymerase, central domain; IPR011068: Nucleotidyltransferase, class I, C-terminal-like	GO:0003723 MF: RNA binding;GO:0004652 MF: polynucleotide adenylyltransferase activity;GO:0016779 MF: nucleotidyltransferase activity;GO:0031123 BP: RNA 3'-end processing;GO:0043631 BP: RNA polyadenylation	IPR002934; IPR007010; IPR007012; IPR011068	GO:0003723; GO:0004652; GO:0016779; GO:0031123; GO:0043631
Antiporter and transmembrane proteins	7B_Nb17_D_SDW_W135_AIDF.AX-109411217	Drought	TraesCS7B01G270800.1	Protein DETOXIFICATION	PF01554: MatE	IPR002528: Multi antimicrobial extrusion protein	GO:0006855 BP: drug transmembrane transport;GO:0015238 MF: drug transmembrane transporter activity;GO:0015297 MF: antiporter activity;GO:0016020 CC: membrane;GO:0055085 BP: transmembrane transport	IPR002528	GO:0006855; GO:0015238; GO:0015297; GO:0016020; GO:0055085
Signal transduction	7B_Nb17_D_SDW_W135_AIDF.AX-109411217	Drought	TraesCS7B01G270900.1	Receptor-like protein kinase	PF08263: Leucine rich repeat N-terminal domain; PF12799: Leucine Rich repeats (2 copies); PF13855: Leucine rich repeat; PF00069: Protein kinase domain	IPR000719: Protein kinase domain; IPR001611: Leucine-rich repeat; IPR003591: Leucine-rich repeat, typical subtype; IPR008271: Serine/threonine-protein kinase, active site; IPR011009: Protein kinase-like domain; IPR013210: Leucine-rich repeat-containing N-terminal, plant-type; IPR025875: Leucine rich repeat 4; IPR032675: Leucine-rich repeat domain, L domain-like	GO:0004672 MF: protein kinase activity;GO:0005515 MF: protein binding;GO:0005524 MF: ATP binding;GO:0006468 BP: protein phosphorylation	IPR000719; IPR001611; IPR003591; IPR008271; IPR011009; IPR013210; IPR025875; IPR032675	GO:0004672; GO:0005515; GO:0005524; GO:0006468
Others	7B_Nb17_D_SDW_W135_AIDF.AX-109411217	Drought	TraesCS7B01G271100.2	SPX and EXS domain-containing protein 1	PF03124: EXS family	IPR004342: EXS, C-terminal	GO:0016021 CC: integral component of membrane	IPR004342	GO:0016021
Osmo-protectant synthesis related protein	7B_Nb17_D_SDW_W135_AIDF.AX-109411217	Drought	TraesCS7B01G271300.3	Initiator tRNA phosphoribosyl transferase family protein	PF17184: Rit1 N-terminal domain; PF04179: Rit1 DUSP-like domain	IPR007306: tRNA A64-2'-O-ribosylphosphate transferase; IPR033421: Rit1, DUSP-like domain; IPR033449: Rit1, N-terminal domain	GO:0019988 BP: charged-tRNA amino acid modification;GO:0043399 MF: tRNA A64-2'-O-ribosylphosphate transferase activity	IPR007306; IPR033421; IPR033449	GO:0019988; GO:0043399
Osmo-protectant synthesis related protein	7B_Nb17_D_SDW_W135_AIDF.AX-109411217	Drought	TraesCS7B01G271400.1	40S ribosomal protein S24	PF01282: Ribosomal protein S24e	IPR001976: Ribosomal protein S24e; IPR012678: Ribosomal protein L23/L15e core domain; IPR018098: Ribosomal S24e conserved site	GO:0003735 MF: structural constituent of ribosome;GO:0005622 CC: intracellular;GO:0005840 CC: ribosome;GO:0006412 BP: translation	IPR001976; IPR012678; IPR018098	GO:0003735; GO:0005622; GO:0005840; GO:0006412
Antiporter and transmembrane proteins	7B_Nb17_D_SDW_W135_AIDF.AX-109411217	Drought	TraesCS7B01G271500.1	ABC transporter family protein	PF00005: ABC transporter; PF01061: ABC-2 type transporter	IPR003439: ABC transporter-like; IPR003593: AAA+ ATPase domain; IPR013525: ABC-2 type transporter; IPR027417: P-loop containing nucleoside triphosphate hydrolase	GO:0005524 MF: ATP binding;GO:0016020 CC: membrane;GO:0016887 MF: ATPase activity	IPR003439; IPR003593; IPR013525; IPR027417	GO:0005524; GO:0016020; GO:0016887
Antiporter and transmembrane proteins	7B_Nb17_D_SDW_W135_AIDF.AX-109411217	Drought	TraesCS7B01G271600.1	Pleiotropic drug resistance ABC transporter	PF14510: ABC-transporter extracellular N-terminal; PF00005: ABC transporter; PF01061: ABC-2 type transporter; PF08370: Plant PDR ABC transporter associated	IPR003439: ABC transporter-like; IPR003593: AAA+ ATPase domain; IPR013525: ABC-2 type transporter; IPR013581: Plant PDR ABC transporter associated; IPR027417: P-loop containing nucleoside triphosphate hydrolase; IPR029481: ABC-transporter extracellular N-terminal domain	GO:0005524 MF: ATP binding;GO:0016020 CC: membrane;GO:0016887 MF: ATPase activity	IPR003439; IPR003593; IPR013525; IPR013581; IPR027417; IPR029481	GO:0005524; GO:0016020; GO:0016887
Others	7B_Nb17_D_SDW_W135_AIDF.AX-109411217	Drought	TraesCS7B01G271700.2	Kinesin-like protein	PF00225: Kinesin motor domain	IPR001715: Calponin homology domain; IPR001752: Kinesin motor domain; IPR027417: P-loop containing nucleoside triphosphate hydrolase	GO:0003777 MF: microtubule motor activity;GO:0005515 MF: protein binding;GO:0005524 MF: ATP binding;GO:0007018 BP: microtubule-based movement;GO:0008017 MF: microtubule binding	IPR001715; IPR001752; IPR027417	GO:0003777; GO:0005515; GO:0005524; GO:0007018; GO:0008017
Signal transduction	7B_Nb17_D_SDW_W135_AIDF.AX-109411217	Drought	TraesCS7B01G272100.1	SWIM zinc finger family protein / mitogen-activated protein kinase kinase kinase-related, putative	PF04434: SWIM zinc finger	IPR001841: Zinc finger, RING-type; IPR007527: Zinc finger, SWIM-type; IPR013083: Zinc finger, RING/FYVE/PHD-type	GO:0005515 MF: protein binding;GO:0008270 MF: zinc ion binding	IPR001841; IPR007527; IPR013083	GO:0005515; GO:0008270
Antiporter and transmembrane proteins	7B_Nb17_D_SDW_W135_AIDF.AX-109411217	Drought	TraesCS7B01G272200.1	Early nodulin-like protein	PF02298: Plastocyanin-like domain	IPR003245: Phytocyanin domain; IPR008972: Cupredoxin	GO:0009055 MF: electron carrier activity	IPR003245; IPR008972	GO:0009055
Transcription factors and translation	7B_Nb17_D_SDW_W135_AIDF.AX-109411217	Drought	TraesCS7B01G272300.1	ethylene-responsive transcription factor	PF00847: AP2 domain	IPR001471: AP2/ERF domain; IPR016177: DNA-binding domain	GO:0003677 MF: DNA binding;GO:0003700 MF: transcription factor activity, sequence-specific DNA binding;GO:0006355 BP: regulation of transcription, DNA-templated	IPR001471; IPR016177	GO:0003677; GO:0003700; GO:0006355
Stress and defense related proteins/ Chaperone	7B_Nb17_D_SDW_W135_AIDF.AX-109411217	Drought	TraesCS7B01G272500.1	Heat shock transcription factor	PF00447: HSF-type DNA-binding	IPR000232: Heat shock factor (HSF)-type, DNA-binding; IPR011991: Winged helix-turn-helix DNA-binding domain	GO:0003700 MF: transcription factor activity, sequence-specific DNA binding;GO:0005634 CC: nucleus;GO:0006355 BP: regulation of transcription, DNA-templated;GO:0043565 MF: sequence-specific DNA binding	IPR000232; IPR011991	GO:0003700; GO:0005634; GO:0006355; GO:0043565
Others	7B_Nb17_D_SDW_W135_AIDF.AX-109411217	Drought	TraesCS7B01G272700.1	Aquaporin	PF00230: Major intrinsic protein	IPR000425: Major intrinsic protein; IPR022357: Major intrinsic protein, conserved site; IPR023271: Aquaporin-like	GO:0005215 MF: transporter activity;GO:0006810 BP: transport;GO:0016020 CC: membrane	IPR000425; IPR022357; IPR023271	GO:0005215; GO:0006810; GO:0016020
Antiporter and transmembrane proteins	7B_Nb17_D_SDW_W135_AIDF.AX-109411217	Drought	TraesCS7B01G272800.1	SH3 domain-containing protein	PF01363: FYVE zinc finger; PF04366: Las17-binding protein actin regulator	IPR000306: FYVE zinc finger; IPR007461: Ysc84 actin-binding domain; IPR011011: Zinc finger, FYVE/PHD-type; IPR013083: Zinc finger, RING/FYVE/PHD-type; IPR017455: Zinc finger, FYVE-related	GO:0046872 MF: metal ion binding	IPR000306; IPR007461; IPR011011; IPR013083; IPR017455	GO:0046872
Signal transduction	7B_Nb17_D_SDW_W135_AIDF.AX-109411217	Drought	TraesCS7B01G273000.1	Protein kinase family protein	PF00069: Protein kinase domain	IPR000719: Protein kinase domain; IPR008271: Serine/threonine-protein kinase, active site; IPR011009: Protein kinase-like domain; IPR017441: Protein kinase, ATP binding site	GO:0004672 MF: protein kinase activity;GO:0005524 MF: ATP binding;GO:0006468 BP: protein phosphorylation	IPR000719; IPR008271; IPR011009; IPR017441	GO:0004672; GO:0005524; GO:0006468
Redox homeostasis and detoxification	7B_Nb17_D_SDW_W135_AIDF.AX-109411217	Drought	TraesCS7B01G273100.1	Cytochrome c oxidase, subunit Vib family protein	PF02297: Cytochrome oxidase c subunit VIb	IPR003213: Cytochrome c oxidase, subunit VIb	GO:0004129 MF: cytochrome-c oxidase activity;GO:0005739 CC: mitochondrion	IPR003213	GO:0004129; GO:0005739
Antiporter and transmembrane proteins	7B_Nb17_D_SDW_W135_AIDF.AX-109411217	Drought	TraesCS7B01G273300.1	Ras-related protein, expressed	PF00071: Ras family	IPR001806: Small GTPase superfamily; IPR005225: Small GTP-binding protein domain; IPR027417: P-loop containing nucleoside triphosphate hydrolase	GO:0003924 MF: GTPase activity;GO:0005525 MF: GTP binding	IPR001806; IPR005225; IPR027417	GO:0003924; GO:0005525
Redox homeostasis and detoxification	7B_Nb17_D_SDW_W135_AIDF.AX-109411217	Drought	TraesCS7B01G273500.1	FAD-binding Berberine family protein	PF01565: FAD binding domain; PF08031: Berberine and berberine like	IPR006094: FAD linked oxidase, N-terminal; IPR012951: Berberine/berberine-like; IPR016166: FAD-binding, type 2; IPR016167: FAD-binding, type 2, subdomain 1; IPR016169: CO dehydrogenase flavoprotein-like, FAD-binding, subdomain 2	GO:0003824 MF: catalytic activity;GO:0016491 MF: oxidoreductase activity;GO:0016614 MF: oxidoreductase activity, acting on CH-OH group of donors;GO:0050660 MF: flavin adenine dinucleotide binding;GO:0055114 BP: oxidation-reduction process	IPR006094; IPR012951; IPR016166; IPR016167; IPR016169	GO:0003824; GO:0016491; GO:0016614; GO:0050660; GO:0055114
Redox homeostasis and detoxification	7B_Nb17_D_SDW_W135_AIDF.AX-109411217	Drought	TraesCS7B01G273600.1	FAD-binding Berberine family protein, putative	PF01565: FAD binding domain; PF08031: Berberine and berberine like	IPR006094: FAD linked oxidase, N-terminal; IPR012951: Berberine/berberine-like; IPR016166: FAD-binding, type 2; IPR016167: FAD-binding, type 2, subdomain 1; IPR016169: CO dehydrogenase flavoprotein-like, FAD-binding, subdomain 2	GO:0003824 MF: catalytic activity;GO:0016491 MF: oxidoreductase activity;GO:0016614 MF: oxidoreductase activity, acting on CH-OH group of donors;GO:0050660 MF: flavin adenine dinucleotide binding;GO:0055114 BP: oxidation-reduction process	IPR006094; IPR012951; IPR016166; IPR016167; IPR016169	GO:0003824; GO:0016491; GO:0016614; GO:0050660; GO:0055114
Redox homeostasis and detoxification	7B_Nb17_D_SDW_W135_AIDF.AX-109411217	Drought	TraesCS7B01G273700.1	FAD-binding Berberine family protein	PF01565: FAD binding domain; PF08031: Berberine and berberine like	IPR006094: FAD linked oxidase, N-terminal; IPR012951: Berberine/berberine-like; IPR016166: FAD-binding, type 2; IPR016167: FAD-binding, type 2, subdomain 1; IPR016169: CO dehydrogenase flavoprotein-like, FAD-binding, subdomain 2	GO:0003824 MF: catalytic activity;GO:0016491 MF: oxidoreductase activity;GO:0016614 MF: oxidoreductase activity, acting on CH-OH group of donors;GO:0050660 MF: flavin adenine dinucleotide binding;GO:0055114 BP: oxidation-reduction process	IPR006094; IPR012951; IPR016166; IPR016167; IPR016169	GO:0003824; GO:0016491; GO:0016614; GO:0050660; GO:0055114
Redox homeostasis and detoxification	7B_Nb17_D_SDW_W135_AIDF.AX-109411217	Drought	TraesCS7B01G273800.1	FAD-binding Berberine family protein	PF01565: FAD binding domain; PF08031: Berberine and berberine like	IPR006094: FAD linked oxidase, N-terminal; IPR012951: Berberine/berberine-like; IPR016166: FAD-binding, type 2; IPR016167: FAD-binding, type 2, subdomain 1; IPR016169: CO dehydrogenase flavoprotein-like, FAD-binding, subdomain 2	GO:0003824 MF: catalytic activity;GO:0016491 MF: oxidoreductase activity;GO:0016614 MF: oxidoreductase activity, acting on CH-OH group of donors;GO:0050660 MF: flavin adenine dinucleotide binding;GO:0055114 BP: oxidation-reduction process	IPR006094; IPR012951; IPR016166; IPR016167; IPR016169	GO:0003824; GO:0016491; GO:0016614; GO:0050660; GO:0055114
Redox homeostasis and detoxification	7B_Nb17_D_SDW_W135_AIDF.AX-109411217	Drought	TraesCS7B01G273900.1	FAD-binding Berberine family protein	PF01565: FAD binding domain; PF08031: Berberine and berberine like	IPR006094: FAD linked oxidase, N-terminal; IPR012951: Berberine/berberine-like; IPR016166: FAD-binding, type 2; IPR016167: FAD-binding, type 2, subdomain 1; IPR016169: CO dehydrogenase flavoprotein-like, FAD-binding, subdomain 2	GO:0003824 MF: catalytic activity;GO:0016491 MF: oxidoreductase activity;GO:0016614 MF: oxidoreductase activity, acting on CH-OH group of donors;GO:0050660 MF: flavin adenine dinucleotide binding;GO:0055114 BP: oxidation-reduction process	IPR006094; IPR012951; IPR016166; IPR016167; IPR016169	GO:0003824; GO:0016491; GO:0016614; GO:0050660; GO:0055114
Others	7B_Nb17_D_SDW_W135_AIDF.AX-109411217	Drought	TraesCS7B01G274100.1	Aspartate aminotransferase	PF00155: Aminotransferase class I and II	IPR000796: Aspartate/other aminotransferase; IPR004838: Aminotransferases, class-I, pyridoxal-phosphate-binding site; IPR004839: Aminotransferase, class I/classII; IPR015422: Pyridoxal phosphate-dependent transferase, subdomain 2; IPR015424: Pyridoxal phosphate-dependent transferase	GO:0003824 MF: catalytic activity;GO:0006520 BP: cellular amino acid metabolic process;GO:0008483 MF: transaminase activity;GO:0009058 BP: biosynthetic process;GO:0030170 MF: pyridoxal phosphate binding	IPR000796; IPR004838; IPR004839; IPR015422; IPR015424	GO:0003824; GO:0006520; GO:0008483; GO:0009058; GO:0030170
Redox homeostasis and detoxification	7B_Nb17_D_SDW_W135_AIDF.AX-109411217	Drought	TraesCS7B01G274200.1	Peroxidase	PF00141: Peroxidase	IPR000823: Plant peroxidase; IPR002016: Haem peroxidase, plant/fungal/bacterial; IPR010255: Haem peroxidase; IPR019793: Peroxidases heam-ligand binding site; IPR019794: Peroxidase, active site	GO:0004601 MF: peroxidase activity;GO:0006979 BP: response to oxidative stress;GO:0020037 MF: heme binding;GO:0055114 BP: oxidation-reduction process	IPR000823; IPR002016; IPR010255; IPR019793; IPR019794	GO:0004601; GO:0006979; GO:0020037; GO:0055114
Redox homeostasis and detoxification	7B_Nb17_D_SDW_W135_AIDF.AX-109411217	Drought	TraesCS7B01G274300.1	Peroxidase	PF00141: Peroxidase	IPR000823: Plant peroxidase; IPR002016: Haem peroxidase, plant/fungal/bacterial; IPR010255: Haem peroxidase; IPR019793: Peroxidases heam-ligand binding site; IPR019794: Peroxidase, active site	GO:0004601 MF: peroxidase activity;GO:0006979 BP: response to oxidative stress;GO:0020037 MF: heme binding;GO:0055114 BP: oxidation-reduction process	IPR000823; IPR002016; IPR010255; IPR019793; IPR019794	GO:0004601; GO:0006979; GO:0020037; GO:0055114
Redox homeostasis and detoxification	7B_Nb17_D_SDW_W135_AIDF.AX-109411217	Drought	TraesCS7B01G274500.1	Peroxidase	PF00141: Peroxidase	IPR000823: Plant peroxidase; IPR002016: Haem peroxidase, plant/fungal/bacterial; IPR010255: Haem peroxidase; IPR019793: Peroxidases heam-ligand binding site; IPR019794: Peroxidase, active site	GO:0004601 MF: peroxidase activity;GO:0006979 BP: response to oxidative stress;GO:0020037 MF: heme binding;GO:0055114 BP: oxidation-reduction process	IPR000823; IPR002016; IPR010255; IPR019793; IPR019794	GO:0004601; GO:0006979; GO:0020037; GO:0055114
Redox homeostasis and detoxification	7B_Nb17_D_SDW_W135_AIDF.AX-109411217	Drought	TraesCS7B01G274900.1	Peroxidase	PF00141: Peroxidase	IPR000823: Plant peroxidase; IPR002016: Haem peroxidase, plant/fungal/bacterial; IPR010255: Haem peroxidase; IPR019793: Peroxidases heam-ligand binding site; IPR019794: Peroxidase, active site	GO:0004601 MF: peroxidase activity;GO:0006979 BP: response to oxidative stress;GO:0020037 MF: heme binding;GO:0055114 BP: oxidation-reduction process	IPR000823; IPR002016; IPR010255; IPR019793; IPR019794	GO:0004601; GO:0006979; GO:0020037; GO:0055114
Redox homeostasis and detoxification	7B_Nb17_D_SDW_W135_AIDF.AX-109411217	Drought	TraesCS7B01G275000.1	Peroxidase	PF00141: Peroxidase	IPR000823: Plant peroxidase; IPR002016: Haem peroxidase, plant/fungal/bacterial; IPR010255: Haem peroxidase; IPR019793: Peroxidases heam-ligand binding site; IPR019794: Peroxidase, active site	GO:0004601 MF: peroxidase activity;GO:0006979 BP: response to oxidative stress;GO:0020037 MF: heme binding;GO:0055114 BP: oxidation-reduction process	IPR000823; IPR002016; IPR010255; IPR019793; IPR019794	GO:0004601; GO:0006979; GO:0020037; GO:0055114
Others	7B_Nb17_D_SDW_W135_AIDF.AX-109411217	Drought	TraesCS7B01G275100.1	Peptidylprolyl isomerase	PF00515: Tetratricopeptide repeat	IPR001440: Tetratricopeptide repeat 1; IPR011990: Tetratricopeptide-like helical domain; IPR013026: Tetratricopeptide repeat-containing domain; IPR019734: Tetratricopeptide repeat	GO:0005515 MF: protein binding	IPR001440; IPR011990; IPR013026; IPR019734	GO:0005515
Redox homeostasis and detoxification	7B_Nb17_D_SDW_W135_AIDF.AX-109411217	Drought	TraesCS7B01G275200.1	Peroxidase	PF00141: Peroxidase	IPR000823: Plant peroxidase; IPR002016: Haem peroxidase, plant/fungal/bacterial; IPR010255: Haem peroxidase; IPR019793: Peroxidases heam-ligand binding site; IPR019794: Peroxidase, active site	GO:0004601 MF: peroxidase activity;GO:0006979 BP: response to oxidative stress;GO:0020037 MF: heme binding;GO:0055114 BP: oxidation-reduction process	IPR000823; IPR002016; IPR010255; IPR019793; IPR019794	GO:0004601; GO:0006979; GO:0020037; GO:0055114
Antiporter and transmembrane proteins	7B_Nb17_D_SDW_W135_AIDF.AX-109411217	Drought	TraesCS7B01G275300.1	SUMO-activating enzyme subunit 1A	PF00899: ThiF family	IPR000011: Ubiquitin/SUMO-activating enzyme E1; IPR000594: THIF-type NAD/FAD binding fold	GO:0006464 BP: cellular protein modification process;GO:0008641 MF: small protein activating enzyme activity	IPR000011; IPR000594	GO:0006464; GO:0008641
Redox homeostasis and detoxification	7B_Nb17_D_SDW_W135_AIDF.AX-109411217	Drought	TraesCS7B01G275400.1	Peroxidase	PF00141: Peroxidase	IPR000823: Plant peroxidase; IPR002016: Haem peroxidase, plant/fungal/bacterial; IPR010255: Haem peroxidase	GO:0004601 MF: peroxidase activity;GO:0006979 BP: response to oxidative stress;GO:0020037 MF: heme binding;GO:0055114 BP: oxidation-reduction process	IPR000823; IPR002016; IPR010255	GO:0004601; GO:0006979; GO:0020037; GO:0055114
Osmo-protectant synthesis related protein	7B_Nb17_D_SDW_W135_AIDF.AX-109411217	Drought	TraesCS7B01G275500.1	50S ribosomal protein L1	PF00687: Ribosomal protein L1p/L10e family	IPR005878: Ribosomal protein L1, bacterial-type; IPR016095: Ribosomal protein L1, 3-layer alpha/beta-sandwich; IPR023673: Ribosomal protein L1, conserved site; IPR023674: Ribosomal protein L1-like; IPR028364: Ribosomal protein L1/ribosomal biogenesis protein	GO:0003723 MF: RNA binding;GO:0003735 MF: structural constituent of ribosome;GO:0006412 BP: translation;GO:0015934 CC: large ribosomal subunit	IPR005878; IPR016095; IPR023673; IPR023674; IPR028364	GO:0003723; GO:0003735; GO:0006412; GO:0015934
Signal transduction	7B_Nb17_D_SDW_W135_AIDF.AX-109411217	Drought	TraesCS7B01G275700.1	Receptor kinase, putative	PF13855: Leucine rich repeat; PF07714: Protein tyrosine kinase	IPR000719: Protein kinase domain; IPR001245: Serine-threonine/tyrosine-protein kinase, catalytic domain; IPR001611: Leucine-rich repeat; IPR011009: Protein kinase-like domain; IPR032675: Leucine-rich repeat domain, L domain-like	GO:0004672 MF: protein kinase activity;GO:0005515 MF: protein binding;GO:0005524 MF: ATP binding;GO:0006468 BP: protein phosphorylation	IPR000719; IPR001245; IPR001611; IPR011009; IPR032675	GO:0004672; GO:0005515; GO:0005524; GO:0006468
Signal transduction	7B_Nb17_D_SDW_W135_AIDF.AX-109411217	Drought	TraesCS7B01G275800.1	Non-specific serine/threonine protein kinase	PF00069: Protein kinase domain; PF03822: NAF domain	IPR000719: Protein kinase domain; IPR004041: NAF domain; IPR008271: Serine/threonine-protein kinase, active site; IPR011009: Protein kinase-like domain; IPR017441: Protein kinase, ATP binding site; IPR018451: NAF/FISL domain	GO:0004672 MF: protein kinase activity;GO:0005524 MF: ATP binding;GO:0006468 BP: protein phosphorylation;GO:0007165 BP: signal transduction	IPR000719; IPR004041; IPR008271; IPR011009; IPR017441; IPR018451	GO:0004672; GO:0005524; GO:0006468; GO:0007165
Antiporter and transmembrane proteins	7B_Nb17_D_SDW_W135_AIDF.AX-109411217	Drought	TraesCS7B01G276000.1	RING finger protein	PF13639: Ring finger domain	IPR001841: Zinc finger, RING-type; IPR013083: Zinc finger, RING/FYVE/PHD-type	GO:0005515 MF: protein binding;GO:0008270 MF: zinc ion binding	IPR001841; IPR013083	GO:0005515; GO:0008270
Redox homeostasis and detoxification	7B_Nb17_D_SDW_W135_AIDF.AX-109411217	Drought	TraesCS7B01G276100.1	Peroxidase	PF00141: Peroxidase	IPR000823: Plant peroxidase; IPR002016: Haem peroxidase, plant/fungal/bacterial; IPR010255: Haem peroxidase; IPR019793: Peroxidases heam-ligand binding site; IPR019794: Peroxidase, active site	GO:0004601 MF: peroxidase activity;GO:0006979 BP: response to oxidative stress;GO:0020037 MF: heme binding;GO:0055114 BP: oxidation-reduction process	IPR000823; IPR002016; IPR010255; IPR019793; IPR019794	GO:0004601; GO:0006979; GO:0020037; GO:0055114
Others	7B_Nb17_D_SDW_W135_AIDF.AX-109411217	Drought	TraesCS7B01G276400.1	Cmp-sialic acid transporter, putative	PF04142: Nucleotide-sugar transporter	IPR007271: Nucleotide-sugar transporter	GO:0000139 CC: Golgi membrane;GO:0005351 MF: sugar:proton symporter activity;GO:0008643 BP: carbohydrate transport;GO:0016021 CC: integral component of membrane	IPR007271	GO:0000139; GO:0005351; GO:0008643; GO:0016021
Others	7B_Nb17_D_SDW_W135_AIDF.AX-109411217	Drought	TraesCS7B01G276500.1	Crooked neck-like protein 1	PF02184: HAT (Half-A-TPR) repeat	IPR003107: HAT (Half-A-TPR) repeat; IPR011990: Tetratricopeptide-like helical domain; IPR013026: Tetratricopeptide repeat-containing domain	GO:0005515 MF: protein binding;GO:0006396 BP: RNA processing	IPR003107; IPR011990; IPR013026	GO:0005515; GO:0006396
Others	7B_Nb17_D_SDW_W135_AIDF.AX-109411217	Drought	TraesCS7B01G277000.2	Heme oxygenase 1	PF01126: Heme oxygenase	IPR016053: Haem oxygenase-like; IPR016084: Haem oxygenase-like, multi-helical	GO:0004392 MF: heme oxygenase (decyclizing) activity;GO:0006788 BP: heme oxidation;GO:0055114 BP: oxidation-reduction process	IPR016053; IPR016084	GO:0004392; GO:0006788; GO:0055114
Osmo-protectant synthesis related protein	7B_Nb17_D_SDW_W135_AIDF.AX-109411217	Drought	TraesCS7B01G277100.1	Ribosomal RNA small subunit methyltransferase B	PF01189: 16S rRNA methyltransferase RsmB/F	IPR001678: SAM-dependent methyltransferase RsmB/NOP2-type; IPR002478: PUA domain; IPR015947: PUA-like domain; IPR018314: Bacterial Fmu (Sun)/eukaryotic nucleolar NOL1/Nop2p, conserved site; IPR023267: RNA (C5-cytosine) methyltransferase; IPR029063: S-adenosyl-L-methionine-dependent methyltransferase	GO:0003723 MF: RNA binding;GO:0008168 MF: methyltransferase activity	IPR001678; IPR002478; IPR015947; IPR018314; IPR023267; IPR029063	GO:0003723; GO:0008168
Plant hormone response	7B_Nb17_D_SDW_W135_AIDF.AX-109411217	Drought	TraesCS7B01G277200.1	Nudix hydrolase	PF00293: NUDIX domain	IPR000086: NUDIX hydrolase domain; IPR015797: NUDIX hydrolase domain-like	GO:0016787 MF: hydrolase activity	IPR000086; IPR015797	GO:0016787
Others	7B_Nb17_D_SDW_W135_AIDF.AX-109411217	Drought	TraesCS7B01G277600.1	DNA-directed RNA polymerase III subunit RPC6	PF05158: RNA polymerase Rpc34 subunit	IPR007832: RNA polymerase Rpc34; IPR011991: Winged helix-turn-helix DNA-binding domain	GO:0005666 CC: DNA-directed RNA polymerase III complex;GO:0006383 BP: transcription from RNA polymerase III promoter	IPR007832; IPR011991	GO:0005666; GO:0006383
Transcription factors and translation	7B_Nb17_D_SDW_W135_AIDF.AX-109411217	Drought	TraesCS7B01G277800.1	Ethylene-responsive transcription factor	PF00847: AP2 domain	IPR001471: AP2/ERF domain; IPR016177: DNA-binding domain	GO:0003677 MF: DNA binding;GO:0003700 MF: transcription factor activity, sequence-specific DNA binding;GO:0006355 BP: regulation of transcription, DNA-templated	IPR001471; IPR016177	GO:0003677; GO:0003700; GO:0006355
Others	7B_Nb17_D_SDW_W135_AIDF.AX-109411217	Drought	TraesCS7B01G277900.1	Phospholipase D	PF00168: C2 domain; PF00614: Phospholipase D Active site motif; PF12357: Phospholipase D C terminal	IPR000008: C2 domain; IPR001736: Phospholipase D/Transphosphatidylase; IPR011402: Phospholipase D, plant; IPR024632: Phospholipase D, C-terminal	GO:0003824 MF: catalytic activity;GO:0004630 MF: phospholipase D activity;GO:0005509 MF: calcium ion binding;GO:0005515 MF: protein binding;GO:0016020 CC: membrane;GO:0046470 BP: phosphatidylcholine metabolic process	IPR000008; IPR001736; IPR011402; IPR024632	GO:0003824; GO:0004630; GO:0005509; GO:0005515; GO:0016020; GO:0046470
Antiporter and transmembrane proteins	7B_Nb17_D_SDW_W135_AIDF.AX-109411217	Drought	TraesCS7B01G278000.1	Mitochondrial carrier-like protein	PF13499: EF-hand domain pair; PF00153: Mitochondrial carrier protein	IPR002048: EF-hand domain; IPR002067: Mitochondrial carrier protein; IPR011992: EF-hand domain pair; IPR018108: Mitochondrial substrate/solute carrier; IPR018247: EF-Hand 1, calcium-binding site; IPR023395: Mitochondrial carrier domain	GO:0005509 MF: calcium ion binding;GO:0055085 BP: transmembrane transport	IPR002048; IPR002067; IPR011992; IPR018108; IPR018247; IPR023395	GO:0005509; GO:0055085
Stress and defense related proteins/ Chaperone	7B_Nb17_D_SDW_W135_AIDF.AX-109411217	Drought	TraesCS7B01G278200.1	Thiamine thiazole synthase, chloroplastic	PF01946: Thi4 family	IPR002922: Thiazole biosynthetic enzyme Thi4 family; IPR023753: FAD/NAD(P)-binding domain; IPR027495: Thiamine thiazole synthase	GO:0006950 BP: response to stress;GO:0009228 BP: thiamine biosynthetic process;GO:0016491 MF: oxidoreductase activity;GO:0055114 BP: oxidation-reduction process	IPR002922; IPR023753; IPR027495	GO:0006950; GO:0009228; GO:0016491; GO:0055114
Transcription factors and translation	7B_Nb17_D_SDW_W135_AIDF.AX-109411217	Drought	TraesCS7B01G278400.1	MYB transcription factor	PF13921: Myb-like DNA-binding domain	IPR001005: SANT/Myb domain; IPR009057: Homeobox domain-like; IPR017930: Myb domain	GO:0003677 MF: DNA binding	IPR001005; IPR009057; IPR017930	GO:0003677
Others	7B_Nb17_D_SDW_W135_AIDF.AX-109411217	Drought	TraesCS7B01G278500.1	Aspartic proteinase	PF00026: Eukaryotic aspartyl protease; PF03489: Saposin-like type B, region 2; PF05184: Saposin-like type B, region 1	IPR001461: Aspartic peptidase A1 family; IPR001969: Aspartic peptidase, active site; IPR007856: Saposin-like type B, region 1; IPR008138: Saposin B type, region 2; IPR008139: Saposin B type domain; IPR011001: Saposin-like; IPR021109: Aspartic peptidase domain; IPR033121: Peptidase family A1 domain	GO:0004190 MF: aspartic-type endopeptidase activity;GO:0006508 BP: proteolysis;GO:0006629 BP: lipid metabolic process	IPR001461; IPR001969; IPR007856; IPR008138; IPR008139; IPR011001; IPR021109; IPR033121	GO:0004190; GO:0006508; GO:0006629
Transcription factors and translation	7B_Nb17_D_SDW_W135_AIDF.AX-109411217	Drought	TraesCS7B01G278700.1	Ethylene-responsive transcription factor	PF00847: AP2 domain	IPR001471: AP2/ERF domain; IPR016177: DNA-binding domain	GO:0003677 MF: DNA binding;GO:0003700 MF: transcription factor activity, sequence-specific DNA binding;GO:0006355 BP: regulation of transcription, DNA-templated	IPR001471; IPR016177	GO:0003677; GO:0003700; GO:0006355
Signal transduction	7B_Nb17_D_SDW_W135_AIDF.AX-109411217	Drought	TraesCS7B01G278800.1	F-box protein	PF13516: Leucine Rich repeat	IPR001611: Leucine-rich repeat; IPR006553: Leucine-rich repeat, cysteine-containing subtype; IPR032675: Leucine-rich repeat domain, L domain-like	GO:0005515 MF: protein binding	IPR001611; IPR006553; IPR032675	GO:0005515
Others	7B_Nb17_D_SDW_W135_AIDF.AX-109411217	Drought	TraesCS7B01G278900.1	RNA-dependent RNA polymerase	PF05183: RNA dependent RNA polymerase	IPR007855: RNA-dependent RNA polymerase, eukaryotic-type	GO:0003968 MF: RNA-directed 5'-3' RNA polymerase activity	IPR007855	GO:0003968
Others	7B_Nb17_D_SDW_W135_AIDF.AX-109411217	Drought	TraesCS7B01G279100.2	Ankyrin repeat protein-like	PF12796: Ankyrin repeats (3 copies)	IPR002110: Ankyrin repeat; IPR011990: Tetratricopeptide-like helical domain; IPR013026: Tetratricopeptide repeat-containing domain; IPR019734: Tetratricopeptide repeat; IPR020683: Ankyrin repeat-containing domain	GO:0005515 MF: protein binding	IPR002110; IPR011990; IPR013026; IPR019734; IPR020683	GO:0005515
Others	7B_Nb17_D_SDW_W135_AIDF.AX-109411217	Drought	TraesCS7B01G279200.1	Ankyrin repeat protein-like	NA	IPR011990: Tetratricopeptide-like helical domain; IPR013026: Tetratricopeptide repeat-containing domain; IPR019734: Tetratricopeptide repeat	GO:0005515 MF: protein binding	IPR011990; IPR013026; IPR019734	GO:0005515
Signal transduction	7B_Nb17_D_SDW_W135_AIDF.AX-109411217	Drought	TraesCS7B01G279300.1	Non-specific serine/threonine protein kinase	PF00069: Protein kinase domain; PF03822: NAF domain	IPR000719: Protein kinase domain; IPR004041: NAF domain; IPR008271: Serine/threonine-protein kinase, active site; IPR011009: Protein kinase-like domain; IPR017441: Protein kinase, ATP binding site; IPR018451: NAF/FISL domain	GO:0004672 MF: protein kinase activity;GO:0005524 MF: ATP binding;GO:0006468 BP: protein phosphorylation;GO:0007165 BP: signal transduction	IPR000719; IPR004041; IPR008271; IPR011009; IPR017441; IPR018451	GO:0004672; GO:0005524; GO:0006468; GO:0007165
Others	7B_Nb17_D_SDW_W135_AIDF.AX-109411217	Drought	TraesCS7B01G279400.1	TPR repeat protein	NA	IPR011990: Tetratricopeptide-like helical domain; IPR013026: Tetratricopeptide repeat-containing domain	GO:0005515 MF: protein binding	IPR011990; IPR013026	GO:0005515
Signal transduction	7B_Nb17_D_SDW_W135_AIDF.AX-109411217	Drought	TraesCS7B01G279600.1	Receptor-kinase, putative	PF08263: Leucine rich repeat N-terminal domain; PF13855: Leucine rich repeat; PF00560: Leucine Rich Repeat; PF07714: Protein tyrosine kinase	IPR000719: Protein kinase domain; IPR001245: Serine-threonine/tyrosine-protein kinase, catalytic domain; IPR001611: Leucine-rich repeat; IPR003591: Leucine-rich repeat, typical subtype; IPR008271: Serine/threonine-protein kinase, active site; IPR011009: Protein kinase-like domain; IPR013210: Leucine-rich repeat-containing N-terminal, plant-type; IPR017441: Protein kinase, ATP binding site; IPR032…	GO:0004672 MF: protein kinase activity;GO:0005515 MF: protein binding;GO:0005524 MF: ATP binding;GO:0006468 BP: protein phosphorylation	IPR000719; IPR001245; IPR001611; IPR003591; IPR008271; IPR011009; IPR013210; IPR017441; IPR032675	GO:0004672; GO:0005515; GO:0005524; GO:0006468
Signal transduction	7B_Nb17_D_SDW_W135_AIDF.AX-109411217	Drought	TraesCS7B01G279700.1	Receptor kinase-like protein	PF00560: Leucine Rich Repeat; PF13855: Leucine rich repeat; PF07714: Protein tyrosine kinase	IPR000719: Protein kinase domain; IPR001245: Serine-threonine/tyrosine-protein kinase, catalytic domain; IPR001611: Leucine-rich repeat; IPR003591: Leucine-rich repeat, typical subtype; IPR008271: Serine/threonine-protein kinase, active site; IPR011009: Protein kinase-like domain; IPR017441: Protein kinase, ATP binding site; IPR032675: Leucine-rich repeat domain, L domain-like	GO:0004672 MF: protein kinase activity;GO:0005515 MF: protein binding;GO:0005524 MF: ATP binding;GO:0006468 BP: protein phosphorylation	IPR000719; IPR001245; IPR001611; IPR003591; IPR008271; IPR011009; IPR017441; IPR032675	GO:0004672; GO:0005515; GO:0005524; GO:0006468
Sugar metabolism	7B_Nb17_D_SDW_W135_AIDF.AX-109411217	Drought	TraesCS7B01G279900.1	Glucan endo-1,3-beta-glucosidase, putative	PF00332: Glycosyl hydrolases family 17	IPR000490: Glycoside hydrolase family 17; IPR017853: Glycoside hydrolase superfamily	GO:0004553 MF: hydrolase activity, hydrolyzing O-glycosyl compounds;GO:0005975 BP: carbohydrate metabolic process	IPR000490; IPR017853	GO:0004553; GO:0005975
Antiporter and transmembrane proteins	7B_Nb17_D_SDW_W135_AIDF.AX-109411217	Drought	TraesCS7B01G280300.2	ABC transporter G family member	PF00005: ABC transporter; PF01061: ABC-2 type transporter	IPR003439: ABC transporter-like; IPR003593: AAA+ ATPase domain; IPR013525: ABC-2 type transporter; IPR027417: P-loop containing nucleoside triphosphate hydrolase	GO:0005524 MF: ATP binding;GO:0016020 CC: membrane;GO:0016887 MF: ATPase activity	IPR003439; IPR003593; IPR013525; IPR027417	GO:0005524; GO:0016020; GO:0016887
Stress and defense related proteins/ Chaperone	7B_Nb17_D_SDW_W135_AIDF.AX-109411217	Drought	TraesCS7B01G280400.1	26S protease regulatory subunit	PF00004: ATPase family associated with various cellular activities (AAA)	IPR003593: AAA+ ATPase domain; IPR003959: ATPase, AAA-type, core; IPR003960: ATPase, AAA-type, conserved site; IPR005937: 26S proteasome subunit P45; IPR027417: P-loop containing nucleoside triphosphate hydrolase	GO:0005524 MF: ATP binding;GO:0005737 CC: cytoplasm;GO:0016787 MF: hydrolase activity;GO:0030163 BP: protein catabolic process	IPR003593; IPR003959; IPR003960; IPR005937; IPR027417	GO:0005524; GO:0005737; GO:0016787; GO:0030163
Others	7B_Nb17_D_SDW_W135_AIDF.AX-109411217	Drought	TraesCS7B01G280500.1	C2 and GRAM domain-containing protein	PF00168: C2 domain; PF16016: Domain of unknown function (DUF4782); PF02893: GRAM domain	IPR000008: C2 domain; IPR004182: GRAM domain; IPR031968: VASt domain	GO:0005515 MF: protein binding	IPR000008; IPR004182; IPR031968	GO:0005515
Redox homeostasis and detoxification	7B_Nb17_D_SDW_W135_AIDF.AX-109411217	Drought	TraesCS7B01G280700.1	Polyamine oxidase	PF01593: Flavin containing amine oxidoreductase	IPR002937: Amine oxidase; IPR023753: FAD/NAD(P)-binding domain	GO:0016491 MF: oxidoreductase activity;GO:0055114 BP: oxidation-reduction process	IPR002937; IPR023753	GO:0016491; GO:0055114
Signal transduction	7B_Nb17_D_SDW_W135_AIDF.AX-109411217	Drought	TraesCS7B01G280900.1	F-box/RNI-like/FBD-like domains-containing protein	PF08387: FBD	IPR001810: F-box domain; IPR006566: FBD domain; IPR032675: Leucine-rich repeat domain, L domain-like	GO:0005515 MF: protein binding	IPR001810; IPR006566; IPR032675	GO:0005515
Others	7B_Nb17_D_SDW_W135_AIDF.AX-109411217	Drought	TraesCS7B01G281000.1	Pentatricopeptide repeat-containing protein	PF01535: PPR repeat; PF13041: PPR repeat family	IPR002885: Pentatricopeptide repeat; IPR011990: Tetratricopeptide-like helical domain	GO:0005515 MF: protein binding	IPR002885; IPR011990	GO:0005515
Signal transduction	7B_Nb17_D_SDW_W135_AIDF.AX-109411217	Drought	TraesCS7B01G281100.1	FBD-associated F-box protein	PF08387: FBD	IPR001810: F-box domain; IPR006566: FBD domain; IPR032675: Leucine-rich repeat domain, L domain-like	GO:0005515 MF: protein binding	IPR001810; IPR006566; IPR032675	GO:0005515
Antiporter and transmembrane proteins	7B_Nb17_D_SDW_W135_AIDF.AX-109411217	Drought	TraesCS7B01G281200.1	Pentatricopeptide repeat-containing family protein	PF01535: PPR repeat; PF13041: PPR repeat family; PF14432: DYW family of nucleic acid deaminases	IPR002885: Pentatricopeptide repeat; IPR011990: Tetratricopeptide-like helical domain; IPR032867: DYW domain	GO:0005515 MF: protein binding;GO:0008270 MF: zinc ion binding	IPR002885; IPR011990; IPR032867	GO:0005515; GO:0008270
Signal transduction	7B_Nb17_D_SDW_W135_AIDF.AX-109411217	Drought	TraesCS7B01G281300.1	F-box family protein	PF12937: F-box-like; PF03478: Protein of unknown function (DUF295)	IPR001810: F-box domain; IPR005174: Domain unknown function DUF295	GO:0005515 MF: protein binding	IPR001810; IPR005174	GO:0005515
Signal transduction	7B_Nb17_D_SDW_W135_AIDF.AX-109411217	Drought	TraesCS7B01G281700.1	F-box family protein	PF00646: F-box domain; PF08387: FBD	IPR001810: F-box domain; IPR006566: FBD domain; IPR032675: Leucine-rich repeat domain, L domain-like	GO:0005515 MF: protein binding	IPR001810; IPR006566; IPR032675	GO:0005515
Signal transduction	7B_Nb17_D_SDW_W135_AIDF.AX-109411217	Drought	TraesCS7B01G281800.1	FBD-associated F-box protein	PF00646: F-box domain; PF08387: FBD	IPR001810: F-box domain; IPR006566: FBD domain; IPR032675: Leucine-rich repeat domain, L domain-like	GO:0005515 MF: protein binding	IPR001810; IPR006566; IPR032675	GO:0005515
Signal transduction	7B_Nb17_D_SDW_W135_AIDF.AX-109411217	Drought	TraesCS7B01G281900.1	FBD-associated F-box protein	PF00646: F-box domain; PF08387: FBD	IPR001810: F-box domain; IPR006566: FBD domain; IPR032675: Leucine-rich repeat domain, L domain-like	GO:0005515 MF: protein binding	IPR001810; IPR006566; IPR032675	GO:0005515
Redox homeostasis and detoxification	7B_Nb17_D_SDW_W135_AIDF.AX-109411217	Drought	TraesCS7B01G282100.1	Alcohol dehydrogenase, putative	PF08240: Alcohol dehydrogenase GroES-like domain; PF00107: Zinc-binding dehydrogenase	IPR002328: Alcohol dehydrogenase, zinc-type, conserved site; IPR011032: GroES-like; IPR013149: Alcohol dehydrogenase, C-terminal; IPR013154: Alcohol dehydrogenase, N-terminal; IPR016040: NAD(P)-binding domain; IPR020843: Polyketide synthase, enoylreductase domain	GO:0008270 MF: zinc ion binding;GO:0016491 MF: oxidoreductase activity;GO:0055114 BP: oxidation-reduction process	IPR002328; IPR011032; IPR013149; IPR013154; IPR016040; IPR020843	GO:0008270; GO:0016491; GO:0055114
Redox homeostasis and detoxification	7B_Nb17_D_SDW_W135_AIDF.AX-109411217	Drought	TraesCS7B01G282300.1	Elongation factor like protein	PF16004: 116 kDa U5 small nuclear ribonucleoprotein component N-terminus; PF00009: Elongation factor Tu GTP binding domain; PF03144: Elongation factor Tu domain 2; PF03764: Elongation factor G, domain IV; PF00679: Elongation factor G C-terminus	IPR000640: Translation elongation factor EFG, V domain; IPR000795: Transcription factor, GTP-binding domain; IPR004161: Translation elongation factor EFTu-like, domain 2; IPR005225: Small GTP-binding protein domain; IPR005517: Translation elongation factor EFG/EF2, domain IV; IPR009000: Translation protein, beta-barrel domain; IPR009022: Elongation factor G, III-V domain; IPR014721: Ribosomal pro…	GO:0003924 MF: GTPase activity;GO:0005525 MF: GTP binding	IPR000640; IPR000795; IPR004161; IPR005225; IPR005517; IPR009000; IPR009022; IPR014721; IPR020568; IPR027417; IPR031950	GO:0003924; GO:0005525
Others	7B_Nb3_D_SDW_W135_AGKP.AX-109328820	Drought	TraesCS7B01G319900.1	UDP-sugar pyrophosphorylase	PF01704: UTP--glucose-1-phosphate uridylyltransferase	IPR002618: UDPGP family; IPR029044: Nucleotide-diphospho-sugar transferases	GO:0008152 BP: metabolic process;GO:0070569 MF: uridylyltransferase activity	IPR002618; IPR029044	GO:0008152; GO:0070569
Others	7B_Nb3_D_SDW_W135_AGKP.AX-109328820	Drought	TraesCS7B01G320000.1	ATP-dependent RNA helicase	PF00270: DEAD/DEAH box helicase; PF00271: Helicase conserved C-terminal domain	IPR000629: ATP-dependent RNA helicase DEAD-box, conserved site; IPR001650: Helicase, C-terminal; IPR011545: DEAD/DEAH box helicase domain; IPR014001: Helicase superfamily 1/2, ATP-binding domain; IPR014014: RNA helicase, DEAD-box type, Q motif; IPR027417: P-loop containing nucleoside triphosphate hydrolase	GO:0003676 MF: nucleic acid binding;GO:0005524 MF: ATP binding	IPR000629; IPR001650; IPR011545; IPR014001; IPR014014; IPR027417	GO:0003676; GO:0005524
Antiporter and transmembrane proteins	7B_Nb3_D_SDW_W135_AGKP.AX-109328820	Drought	TraesCS7B01G320100.2	Zinc-transporting ATPase	PF00122: E1-E2 ATPase; PF00702: haloacid dehalogenase-like hydrolase	IPR001757: P-type ATPase; IPR006121: Heavy metal-associated domain, HMA; IPR008250: P-type ATPase, A domain; IPR018303: P-type ATPase, phosphorylation site; IPR023214: HAD-like domain; IPR023298: P-type ATPase, transmembrane domain; IPR023299: P-type ATPase, cytoplasmic domain N; IPR027256: P-type ATPase, subfamily IB	GO:0000166 MF: nucleotide binding;GO:0006812 BP: cation transport;GO:0016021 CC: integral component of membrane;GO:0019829 MF: cation-transporting ATPase activity;GO:0030001 BP: metal ion transport;GO:0046872 MF: metal ion binding	IPR001757; IPR006121; IPR008250; IPR018303; IPR023214; IPR023298; IPR023299; IPR027256	GO:0000166; GO:0006812; GO:0016021; GO:0019829; GO:0030001; GO:0046872
Others	7B_Nb3_D_SDW_W135_AGKP.AX-109328820	Drought	TraesCS7B01G320200.1	Peptidyl-prolyl cis-trans isomerase	PF00160: Cyclophilin type peptidyl-prolyl cis-trans isomerase/CLD	IPR002130: Cyclophilin-type peptidyl-prolyl cis-trans isomerase domain; IPR029000: Cyclophilin-like domain	GO:0000413 BP: protein peptidyl-prolyl isomerization;GO:0003755 MF: peptidyl-prolyl cis-trans isomerase activity;GO:0006457 BP: protein folding	IPR002130; IPR029000	GO:0000413; GO:0003755; GO:0006457
Sugar metabolism	7B_Nb3_D_SDW_W135_AGKP.AX-109328820	Drought	TraesCS7B01G320500.1	UDP-glycosyltransferase	PF13579: Glycosyl transferase 4-like domain; PF00201: UDP-glucoronosyl and UDP-glucosyl transferase	IPR002213: UDP-glucuronosyl/UDP-glucosyltransferase; IPR028098: Glycosyltransferase subfamily 4-like, N-terminal domain	GO:0008152 BP: metabolic process;GO:0016758 MF: transferase activity, transferring hexosyl groups	IPR002213; IPR028098	GO:0008152; GO:0016758
Stress and defense related proteins/ Chaperone	7B_Nb3_D_SDW_W135_AGKP.AX-109328820	Drought	TraesCS7B01G320600.1	Disease resistance protein (TIR-NBS-LRR class)	PF00931: NB-ARC domain	IPR002182: NB-ARC; IPR027417: P-loop containing nucleoside triphosphate hydrolase	GO:0043531 MF: ADP binding	IPR002182; IPR027417	GO:0043531
Stress and defense related proteins/ Chaperone	7B_Nb3_D_SDW_W135_AGKP.AX-109328820	Drought	TraesCS7B01G320700.1	Disease resistance protein RPM1	PF00931: NB-ARC domain	IPR002182: NB-ARC; IPR011991: Winged helix-turn-helix DNA-binding domain; IPR032675: Leucine-rich repeat domain, L domain-like	GO:0043531 MF: ADP binding	IPR002182; IPR011991; IPR032675	GO:0043531
Sugar metabolism	7B_Nb3_D_SDW_W135_AGKP.AX-109328820	Drought	TraesCS7B01G320800.1	Core-2/I-branching beta-1,6-N-acetylglucosaminyltransferase family protein	PF02485: Core-2/I-Branching enzyme	IPR003406: Glycosyl transferase, family 14	GO:0008375 MF: acetylglucosaminyltransferase activity;GO:0016020 CC: membrane	IPR003406	GO:0008375; GO:0016020
Antiporter and transmembrane proteins	7B_Nb3_D_SDW_W135_AGKP.AX-109328820	Drought	TraesCS7B01G320900.1	Zinc-transporting ATPase	PF00122: E1-E2 ATPase; PF00702: haloacid dehalogenase-like hydrolase	IPR001757: P-type ATPase; IPR006121: Heavy metal-associated domain, HMA; IPR008250: P-type ATPase, A domain; IPR018303: P-type ATPase, phosphorylation site; IPR023214: HAD-like domain; IPR023298: P-type ATPase, transmembrane domain; IPR023299: P-type ATPase, cytoplasmic domain N; IPR027256: P-type ATPase, subfamily IB	GO:0000166 MF: nucleotide binding;GO:0006812 BP: cation transport;GO:0016021 CC: integral component of membrane;GO:0019829 MF: cation-transporting ATPase activity;GO:0030001 BP: metal ion transport;GO:0046872 MF: metal ion binding	IPR001757; IPR006121; IPR008250; IPR018303; IPR023214; IPR023298; IPR023299; IPR027256	GO:0000166; GO:0006812; GO:0016021; GO:0019829; GO:0030001; GO:0046872
Antiporter and transmembrane proteins	7B_Nb3_D_SDW_W135_AGKP.AX-109328820	Drought	TraesCS7B01G321200.2	Zinc transporter	PF02535: ZIP Zinc transporter	IPR003689: Zinc/iron permease	GO:0016020 CC: membrane;GO:0030001 BP: metal ion transport;GO:0046873 MF: metal ion transmembrane transporter activity;GO:0055085 BP: transmembrane transport	IPR003689	GO:0016020; GO:0030001; GO:0046873; GO:0055085
Transcription factors and translation	7B_Nb3_D_SDW_W135_AGKP.AX-109328820	Drought	TraesCS7B01G321300.1	BZIP transcription factor	PF07716: Basic region leucine zipper	IPR004827: Basic-leucine zipper domain	GO:0003700 MF: transcription factor activity, sequence-specific DNA binding;GO:0006355 BP: regulation of transcription, DNA-templated;GO:0043565 MF: sequence-specific DNA binding	IPR004827	GO:0003700; GO:0006355; GO:0043565
Transcription factors and translation	7B_Nb3_D_SDW_W135_AGKP.AX-109328820	Drought	TraesCS7B01G321400.1	Basic helix-loop-helix (BHLH) family transcription factor	PF00010: Helix-loop-helix DNA-binding domain	IPR011598: Myc-type, basic helix-loop-helix (bHLH) domain	GO:0046983 MF: protein dimerization activity	IPR011598	GO:0046983
Others	7B_Nb3_D_SDW_W135_AGKP.AX-109328820	Drought	TraesCS7B01G321600.1	Pentatricopeptide repeat-containing protein	PF01535: PPR repeat; PF13041: PPR repeat family	IPR002885: Pentatricopeptide repeat; IPR011990: Tetratricopeptide-like helical domain	GO:0005515 MF: protein binding	IPR002885; IPR011990	GO:0005515
Others	7B_Nb3_D_SDW_W135_AGKP.AX-109328820	Drought	TraesCS7B01G321700.1	Subtilisin-like protease	PF05922: Peptidase inhibitor I9; PF00082: Subtilase family; PF02225: PA domain; PF06280: Fn3-like domain	IPR000209: Peptidase S8/S53 domain; IPR003137: PA domain; IPR009020: Protease propeptides/proteinase inhibitor I9; IPR010259: Peptidase S8 propeptide/proteinase inhibitor I9; IPR010435: Fn3-like domain; IPR013783: Immunoglobulin-like fold; IPR015500: Peptidase S8, subtilisin-related; IPR023827: Peptidase S8, subtilisin, Asp-active site; IPR023828: Peptidase S8, subtilisin, Ser-active site	GO:0004252 MF: serine-type endopeptidase activity;GO:0005618 CC: cell wall;GO:0006508 BP: proteolysis;GO:0016020 CC: membrane	IPR000209; IPR003137; IPR009020; IPR010259; IPR010435; IPR013783; IPR015500; IPR023827; IPR023828	GO:0004252; GO:0005618; GO:0006508; GO:0016020
Redox homeostasis and detoxification	7B_Nb3_D_SDW_W135_AGKP.AX-109328820	Drought	TraesCS7B01G321800.1	L-gulonolactone oxidase	PF01565: FAD binding domain; PF04030: D-arabinono-1,4-lactone oxidase	IPR006094: FAD linked oxidase, N-terminal; IPR007173: D-arabinono-1,4-lactone oxidase; IPR010030: L-gulonolactone oxidase, plant; IPR016166: FAD-binding, type 2; IPR016167: FAD-binding, type 2, subdomain 1; IPR016169: CO dehydrogenase flavoprotein-like, FAD-binding, subdomain 2	GO:0003824 MF: catalytic activity;GO:0003885 MF: D-arabinono-1,4-lactone oxidase activity;GO:0016020 CC: membrane;GO:0016491 MF: oxidoreductase activity;GO:0016614 MF: oxidoreductase activity, acting on CH-OH group of donors;GO:0050660 MF: flavin adenine dinucleotide binding;GO:0055114 BP: oxidation-reduction process	IPR006094; IPR007173; IPR010030; IPR016166; IPR016167; IPR016169	GO:0003824; GO:0003885; GO:0016020; GO:0016491; GO:0016614; GO:0050660; GO:0055114
Stress and defense related proteins/ Chaperone	7B_Nb3_D_SDW_W135_AGKP.AX-109328820	Drought	TraesCS7B01G321900.1	26S proteasome non-ATPase regulatory subunit-like protein	NA	IPR011989: Armadillo-like helical; IPR016024: Armadillo-type fold	GO:0005488 MF: binding	IPR011989; IPR016024	GO:0005488
Stress and defense related proteins/ Chaperone	7B_Nb3_D_SDW_W135_AGKP.AX-109328820	Drought	TraesCS7B01G322000.1	26S proteasome non-ATPase regulatory subunit-like protein	PF01851: Proteasome/cyclosome repeat	IPR002015: Proteasome/cyclosome repeat; IPR011989: Armadillo-like helical; IPR016024: Armadillo-type fold	GO:0005488 MF: binding	IPR002015; IPR011989; IPR016024	GO:0005488
Others	7B_Nb3_D_SDW_W135_AGKP.AX-109328820	Drought	TraesCS7B01G322100.1	Nuclear transport factor 2 family protein	PF02136: Nuclear transport factor 2 (NTF2) domain	IPR002075: Nuclear transport factor 2; IPR018222: Nuclear transport factor 2, eukaryote; IPR032710: NTF2-like domain	GO:0005622 CC: intracellular;GO:0006810 BP: transport	IPR002075; IPR018222; IPR032710	GO:0005622; GO:0006810
Signal transduction	7B_Nb3_D_SDW_W135_AGKP.AX-109328820	Drought	TraesCS7B01G322200.1	Receptor lectin kinase	PF00139: Legume lectin domain; PF00069: Protein kinase domain	IPR000719: Protein kinase domain; IPR001220: Legume lectin domain; IPR011009: Protein kinase-like domain; IPR013320: Concanavalin A-like lectin/glucanase domain; IPR017441: Protein kinase, ATP binding site	GO:0004672 MF: protein kinase activity;GO:0005524 MF: ATP binding;GO:0006468 BP: protein phosphorylation;GO:0030246 MF: carbohydrate binding	IPR000719; IPR001220; IPR011009; IPR013320; IPR017441	GO:0004672; GO:0005524; GO:0006468; GO:0030246
Repair, protection and cell wall modification	7B_Nb3_D_SDW_W135_AGKP.AX-109328820	Drought	TraesCS7B01G322300.1	ENTH/ANTH/VHS superfamily protein	PF07651: ANTH domain	IPR008942: ENTH/VHS; IPR011417: AP180 N-terminal homology (ANTH) domain; IPR013809: ENTH domain; IPR014712: Phosphoinositide-binding clathrin adaptor, domain 2	GO:0005543 MF: phospholipid binding;GO:0005545 MF: 1-phosphatidylinositol binding;GO:0030136 CC: clathrin-coated vesicle;GO:0030276 MF: clathrin binding;GO:0048268 BP: clathrin coat assembly	IPR008942; IPR011417; IPR013809; IPR014712	GO:0005543; GO:0005545; GO:0030136; GO:0030276; GO:0048268
Sugar metabolism	7B_Nb3_D_SDW_W135_AGKP.AX-109328820	Drought	TraesCS7B01G322400.1	Glycosyltransferase	PF00201: UDP-glucoronosyl and UDP-glucosyl transferase	IPR002213: UDP-glucuronosyl/UDP-glucosyltransferase	GO:0008152 BP: metabolic process;GO:0016758 MF: transferase activity, transferring hexosyl groups	IPR002213	GO:0008152; GO:0016758
Antiporter and transmembrane proteins	7B_Nb3_D_SDW_W135_AGKP.AX-109328820	Drought	TraesCS7B01G322500.4	Aminodeoxychorismate synthase	PF00117: Glutamine amidotransferase class-I; PF04715: Anthranilate synthase component I, N terminal region; PF00425: chorismate binding enzyme	IPR005801: ADC synthase; IPR005802: Para-aminobenzoate synthase, component I; IPR006805: Anthranilate synthase component I, N-terminal; IPR015890: Chorismate-utilising enzyme, C-terminal; IPR017926: Glutamine amidotransferase; IPR029062: Class I glutamine amidotransferase-like	GO:0009058 BP: biosynthetic process;GO:0009396 BP: folic acid-containing compound biosynthetic process	IPR005801; IPR005802; IPR006805; IPR015890; IPR017926; IPR029062	GO:0009058; GO:0009396
Stress and defense related proteins/ Chaperone	7B_Nb3_D_SDW_W135_AGKP.AX-109328820	Drought	TraesCS7B01G322600.1	Zinc finger protein CONSTANS-LIKE 2	PF06203: CCT motif	IPR010402: CCT domain	GO:0005515 MF: protein binding	IPR010402	GO:0005515
Others	7B_Nb3_D_SDW_W135_AGKP.AX-109328820	Drought	TraesCS7B01G322700.1	Alpha/beta-Hydrolases superfamily protein	PF07859: alpha/beta hydrolase fold	IPR013094: Alpha/beta hydrolase fold-3; IPR029058: Alpha/Beta hydrolase fold	GO:0008152 BP: metabolic process;GO:0016787 MF: hydrolase activity	IPR013094; IPR029058	GO:0008152; GO:0016787
Signal transduction	7B_Nb3_D_SDW_W135_AGKP.AX-109328820	Drought	TraesCS7B01G322900.1	Mitogen-activated protein kinase	PF00069: Protein kinase domain	IPR000719: Protein kinase domain; IPR003527: Mitogen-activated protein (MAP) kinase, conserved site; IPR008271: Serine/threonine-protein kinase, active site; IPR011009: Protein kinase-like domain; IPR017441: Protein kinase, ATP binding site	GO:0004672 MF: protein kinase activity;GO:0004707 MF: MAP kinase activity;GO:0005524 MF: ATP binding;GO:0006468 BP: protein phosphorylation	IPR000719; IPR003527; IPR008271; IPR011009; IPR017441	GO:0004672; GO:0004707; GO:0005524; GO:0006468
Stress and defense related proteins/ Chaperone	7B_Nb3_D_SDW_W135_AGKP.AX-109328820	Drought	TraesCS7B01G323000.1	NBS-LRR-like resistance protein	PF00931: NB-ARC domain	IPR002182: NB-ARC; IPR027417: P-loop containing nucleoside triphosphate hydrolase	GO:0043531 MF: ADP binding	IPR002182; IPR027417	GO:0043531
Stress and defense related proteins/ Chaperone	7B_Nb3_D_SDW_W135_AGKP.AX-109328820	Drought	TraesCS7B01G323100.1	Zinc finger CCHC domain-containing protein 10	PF13917: Zinc knuckle	IPR001878: Zinc finger, CCHC-type	GO:0003676 MF: nucleic acid binding;GO:0008270 MF: zinc ion binding	IPR001878	GO:0003676; GO:0008270
Others	7B_Nb3_D_SDW_W135_AGKP.AX-109328820	Drought	TraesCS7B01G323200.1	Purple acid phosphatase	PF00149: Calcineurin-like phosphoesterase	IPR004843: Calcineurin-like phosphoesterase domain, ApaH type; IPR011230: Phosphoesterase At2g46880; IPR029052: Metallo-dependent phosphatase-like	GO:0016787 MF: hydrolase activity	IPR004843; IPR011230; IPR029052	GO:0016787
Sugar metabolism	7B_Nb3_D_SDW_W135_AGKP.AX-109328820	Drought	TraesCS7B01G323400.1	UDP-glycosyltransferase	PF00201: UDP-glucoronosyl and UDP-glucosyl transferase	IPR002213: UDP-glucuronosyl/UDP-glucosyltransferase	GO:0008152 BP: metabolic process;GO:0016758 MF: transferase activity, transferring hexosyl groups	IPR002213	GO:0008152; GO:0016758
Antiporter and transmembrane proteins	7B_Nb3_D_SDW_W135_AGKP.AX-109328820	Drought	TraesCS7B01G323600.1	GATA transcription factor	PF06200: tify domain; PF06203: CCT motif; PF00320: GATA zinc finger	IPR000679: Zinc finger, GATA-type; IPR010399: Tify domain; IPR010402: CCT domain; IPR013088: Zinc finger, NHR/GATA-type; IPR015943: WD40/YVTN repeat-like-containing domain	GO:0003700 MF: transcription factor activity, sequence-specific DNA binding;GO:0005515 MF: protein binding;GO:0006355 BP: regulation of transcription, DNA-templated;GO:0008270 MF: zinc ion binding;GO:0043565 MF: sequence-specific DNA binding	IPR000679; IPR010399; IPR010402; IPR013088; IPR015943	GO:0003700; GO:0005515; GO:0006355; GO:0008270; GO:0043565
Antiporter and transmembrane proteins	7B_Nb3_D_SDW_W135_AGKP.AX-109328820	Drought	TraesCS7B01G323700.2	Serrate RNA effector molecule	PF12066: Domain of unknown function (DUF3546); PF04959: Arsenite-resistance protein 2	IPR007042: Arsenite-resistance protein 2; IPR013087: Zinc finger C2H2-type; IPR021933: Protein of unknown function DUF3546	GO:0003676 MF: nucleic acid binding	IPR007042; IPR013087; IPR021933	GO:0003676
Stress and defense related proteins/ Chaperone	7B_Nb3_D_SDW_W135_AGKP.AX-109328820	Drought	TraesCS7B01G323800.1	NBS-LRR-like resistance protein	PF00931: NB-ARC domain	IPR002182: NB-ARC; IPR011991: Winged helix-turn-helix DNA-binding domain; IPR027417: P-loop containing nucleoside triphosphate hydrolase; IPR032675: Leucine-rich repeat domain, L domain-like	GO:0043531 MF: ADP binding	IPR002182; IPR011991; IPR027417; IPR032675	GO:0043531
Others	7B_Nb3_D_SDW_W135_AGKP.AX-109328820	Drought	TraesCS7B01G324200.1	B3 domain-containing protein family	PF02362: B3 DNA binding domain	IPR003340: B3 DNA binding domain; IPR015300: DNA-binding pseudobarrel domain	GO:0003677 MF: DNA binding	IPR003340; IPR015300	GO:0003677
Stress and defense related proteins/ Chaperone	7B_Nb3_D_SDW_W135_AGKP.AX-109328820	Drought	TraesCS7B01G324300.1	NBS-LRR-like resistance protein	PF00931: NB-ARC domain	IPR002182: NB-ARC; IPR011991: Winged helix-turn-helix DNA-binding domain; IPR027417: P-loop containing nucleoside triphosphate hydrolase; IPR032675: Leucine-rich repeat domain, L domain-like	GO:0043531 MF: ADP binding	IPR002182; IPR011991; IPR027417; IPR032675	GO:0043531
Transcription factors and translation	7B_Nb3_D_SDW_W135_AGKP.AX-109328820	Drought	TraesCS7B01G324400.1	Ethylene-responsive transcription factor	NA	IPR001471: AP2/ERF domain; IPR016177: DNA-binding domain	GO:0003677 MF: DNA binding;GO:0003700 MF: transcription factor activity, sequence-specific DNA binding;GO:0006355 BP: regulation of transcription, DNA-templated	IPR001471; IPR016177	GO:0003677; GO:0003700; GO:0006355
Signal transduction	7B_Nb3_D_SDW_W135_AGKP.AX-109328820	Drought	TraesCS7B01G324500.1	Receptor-like kinase	PF08263: Leucine rich repeat N-terminal domain; PF13855: Leucine rich repeat; PF07714: Protein tyrosine kinase	IPR000719: Protein kinase domain; IPR001245: Serine-threonine/tyrosine-protein kinase, catalytic domain; IPR001611: Leucine-rich repeat; IPR008271: Serine/threonine-protein kinase, active site; IPR011009: Protein kinase-like domain; IPR013210: Leucine-rich repeat-containing N-terminal, plant-type; IPR017441: Protein kinase, ATP binding site; IPR032675: Leucine-rich repeat domain, L domain-like	GO:0004672 MF: protein kinase activity;GO:0005515 MF: protein binding;GO:0005524 MF: ATP binding;GO:0006468 BP: protein phosphorylation	IPR000719; IPR001245; IPR001611; IPR008271; IPR011009; IPR013210; IPR017441; IPR032675	GO:0004672; GO:0005515; GO:0005524; GO:0006468
Signal transduction	7B_Nb3_D_SDW_W135_AGKP.AX-109328820	Drought	TraesCS7B01G324700.1	FBD-associated F-box protein	NA	IPR001810: F-box domain; IPR032675: Leucine-rich repeat domain, L domain-like	GO:0005515 MF: protein binding	IPR001810; IPR032675	GO:0005515
Redox homeostasis and detoxification	7B_Nb3_D_SDW_W135_AGKP.AX-109328820	Drought	TraesCS7B01G324800.1	NAD(P)H dehydrogenase (Quinone)	PF03358: NADPH-dependent FMN reductase	IPR005025: NADPH-dependent FMN reductase-like; IPR008254: Flavodoxin/nitric oxide synthase; IPR010089: Flavoprotein WrbA; IPR029039: Flavoprotein-like domain	GO:0003955 MF: NAD(P)H dehydrogenase (quinone) activity;GO:0010181 MF: FMN binding;GO:0016491 MF: oxidoreductase activity	IPR005025; IPR008254; IPR010089; IPR029039	GO:0003955; GO:0010181; GO:0016491
Redox homeostasis and detoxification	7B_Nb3_D_SDW_W135_AGKP.AX-109328820	Drought	TraesCS7B01G324900.1	Choline monooxygenase	PF00355: Rieske [2Fe-2S] domain; PF00848: Ring hydroxylating alpha subunit (catalytic domain)	IPR001663: Aromatic-ring-hydroxylating dioxygenase, alpha subunit; IPR015879: Aromatic-ring-hydroxylating dioxygenase, alpha subunit, C-terminal domain; IPR017941: Rieske [2Fe-2S] iron-sulphur domain	GO:0005506 MF: iron ion binding;GO:0006725 BP: cellular aromatic compound metabolic process;GO:0016491 MF: oxidoreductase activity;GO:0016708 MF: oxidoreductase activity, acting on paired donors, with incorporation or reduction of molecular oxygen, NAD(P)H as one donor, and incorporation of two atoms of oxygen into one donor;GO:0019439 BP: aromatic compound catabolic process;GO:0051537 MF: 2 iron…	IPR001663; IPR015879; IPR017941	GO:0005506; GO:0006725; GO:0016491; GO:0016708; GO:0019439; GO:0051537; GO:0055114
Signal transduction	7B_Nb3_D_SDW_W135_AGKP.AX-109328820	Drought	TraesCS7B01G325300.1	Leucine-rich repeat receptor-like protein kinase family	PF08263: Leucine rich repeat N-terminal domain; PF00560: Leucine Rich Repeat	IPR001611: Leucine-rich repeat; IPR013210: Leucine-rich repeat-containing N-terminal, plant-type; IPR032675: Leucine-rich repeat domain, L domain-like	GO:0005515 MF: protein binding	IPR001611; IPR013210; IPR032675	GO:0005515
Others	7B_Nb3_D_SDW_W135_AGKP.AX-109328820	Drought	TraesCS7B01G325400.1	Exocyst complex component EXO70A1	PF03081: Exo70 exocyst complex subunit	IPR004140: Exocyst complex component Exo70; IPR016159: Cullin repeat-like-containing domain	GO:0000145 CC: exocyst;GO:0006887 BP: exocytosis	IPR004140; IPR016159	GO:0000145; GO:0006887
Others	7B_Nb3_D_SDW_W135_AGKP.AX-109328820	Drought	TraesCS7B01G325700.1	RNA-binding protein	PF00076: RNA recognition motif. (a.k.a. RRM, RBD, or RNP domain)	IPR000504: RNA recognition motif domain	GO:0003676 MF: nucleic acid binding	IPR000504	GO:0003676
Redox homeostasis and detoxification	7B_Nb3_D_SDW_W135_AGKP.AX-109328820	Drought	TraesCS7B01G325800.1	Peroxidase	PF00141: Peroxidase	IPR000823: Plant peroxidase; IPR002016: Haem peroxidase, plant/fungal/bacterial; IPR010255: Haem peroxidase; IPR019793: Peroxidases heam-ligand binding site	GO:0004601 MF: peroxidase activity;GO:0006979 BP: response to oxidative stress;GO:0020037 MF: heme binding;GO:0055114 BP: oxidation-reduction process	IPR000823; IPR002016; IPR010255; IPR019793	GO:0004601; GO:0006979; GO:0020037; GO:0055114
Signal transduction	7B_Nb3_D_SDW_W135_AGKP.AX-109328820	Drought	TraesCS7B01G325900.1	Receptor protein kinase-like protein	PF00069: Protein kinase domain	IPR000719: Protein kinase domain; IPR011009: Protein kinase-like domain	GO:0004672 MF: protein kinase activity;GO:0005524 MF: ATP binding;GO:0006468 BP: protein phosphorylation	IPR000719; IPR011009	GO:0004672; GO:0005524; GO:0006468
Stress and defense related proteins/ Chaperone	7B_Nb3_D_SDW_W135_AGKP.AX-109328820	Drought	TraesCS7B01G326000.1	NBS-LRR-like resistance protein	PF00931: NB-ARC domain	IPR002182: NB-ARC; IPR011991: Winged helix-turn-helix DNA-binding domain; IPR027417: P-loop containing nucleoside triphosphate hydrolase; IPR032675: Leucine-rich repeat domain, L domain-like	GO:0043531 MF: ADP binding	IPR002182; IPR011991; IPR027417; IPR032675	GO:0043531
Signal transduction	7B_Nb3_D_SDW_W135_AGKP.AX-109328820	Drought	TraesCS7B01G326100.1	Receptor protein kinase, putative	PF00069: Protein kinase domain	IPR000719: Protein kinase domain; IPR008271: Serine/threonine-protein kinase, active site; IPR011009: Protein kinase-like domain; IPR017441: Protein kinase, ATP binding site	GO:0004672 MF: protein kinase activity;GO:0005524 MF: ATP binding;GO:0006468 BP: protein phosphorylation	IPR000719; IPR008271; IPR011009; IPR017441	GO:0004672; GO:0005524; GO:0006468
Others	7B_Nb3_D_SDW_W135_AGKP.AX-109328820	Drought	TraesCS7B01G326200.1	Protein phosphatase 2C	PF00481: Protein phosphatase 2C	IPR000222: PPM-type phosphatase, divalent cation binding; IPR001932: PPM-type phosphatase domain	GO:0003824 MF: catalytic activity;GO:0043169 MF: cation binding	IPR000222; IPR001932	GO:0003824; GO:0043169
Transcription factors and translation	7B_Nb3_D_SDW_W135_AGKP.AX-109328820	Drought	TraesCS7B01G326300.1	Homeobox protein, putative	PF00046: Homeobox domain; PF02183: Homeobox associated leucine zipper	IPR001356: Homeobox domain; IPR003106: Leucine zipper, homeobox-associated; IPR009057: Homeobox domain-like; IPR017970: Homeobox, conserved site	GO:0003677 MF: DNA binding;GO:0003700 MF: transcription factor activity, sequence-specific DNA binding;GO:0006355 BP: regulation of transcription, DNA-templated;GO:0043565 MF: sequence-specific DNA binding	IPR001356; IPR003106; IPR009057; IPR017970	GO:0003677; GO:0003700; GO:0006355; GO:0043565
Antiporter and transmembrane proteins	7B_Nb3_D_SDW_W135_AGKP.AX-109328820	Drought	TraesCS7B01G326400.1	ATP-dependent zinc metalloprotease FtsH	PF14363: Domain associated at C-terminal with AAA; PF00004: ATPase family associated with various cellular activities (AAA)	IPR003593: AAA+ ATPase domain; IPR003959: ATPase, AAA-type, core; IPR003960: ATPase, AAA-type, conserved site; IPR025753: AAA-type ATPase, N-terminal domain; IPR027417: P-loop containing nucleoside triphosphate hydrolase	GO:0005524 MF: ATP binding	IPR003593; IPR003959; IPR003960; IPR025753; IPR027417	GO:0005524
Signal transduction	7B_Nb3_D_SDW_W135_AGKP.AX-109328820	Drought	TraesCS7B01G326500.1	F-box protein	PF03478: Protein of unknown function (DUF295)	IPR001810: F-box domain; IPR005174: Domain unknown function DUF295	GO:0005515 MF: protein binding	IPR001810; IPR005174	GO:0005515
Others	7B_Nb3_D_SDW_W135_AGKP.AX-109328820	Drought	TraesCS7B01G326700.1	Sulfotransferase	PF00685: Sulfotransferase domain	IPR000863: Sulfotransferase domain; IPR027417: P-loop containing nucleoside triphosphate hydrolase	GO:0008146 MF: sulfotransferase activity	IPR000863; IPR027417	GO:0008146
Repair, protection and cell wall modification	7B_Nb3_D_SDW_W135_AGKP.AX-109328820	Drought	TraesCS7B01G326900.1	Xyloglucan endotransglucosylase/hydrolase	PF00722: Glycosyl hydrolases family 16; PF06955: Xyloglucan endo-transglycosylase (XET) C-terminus	IPR000757: Glycoside hydrolase family 16; IPR008263: Glycoside hydrolase, family 16, active site; IPR008264: Beta-glucanase; IPR010713: Xyloglucan endo-transglycosylase, C-terminal; IPR013320: Concanavalin A-like lectin/glucanase domain; IPR016455: Xyloglucan endotransglucosylase/hydrolase	GO:0004553 MF: hydrolase activity, hydrolyzing O-glycosyl compounds;GO:0005618 CC: cell wall;GO:0005975 BP: carbohydrate metabolic process;GO:0006073 BP: cellular glucan metabolic process;GO:0010411 BP: xyloglucan metabolic process;GO:0016762 MF: xyloglucan:xyloglucosyl transferase activity;GO:0042546 BP: cell wall biogenesis;GO:0048046 CC: apoplast	IPR000757; IPR008263; IPR008264; IPR010713; IPR013320; IPR016455	GO:0004553; GO:0005618; GO:0005975; GO:0006073; GO:0010411; GO:0016762; GO:0042546; GO:0048046
Repair, protection and cell wall modification	7B_Nb3_D_SDW_W135_AGKP.AX-109328820	Drought	TraesCS7B01G327000.1	Xyloglucan endotransglucosylase/hydrolase	PF00722: Glycosyl hydrolases family 16; PF06955: Xyloglucan endo-transglycosylase (XET) C-terminus	IPR000757: Glycoside hydrolase family 16; IPR008263: Glycoside hydrolase, family 16, active site; IPR008264: Beta-glucanase; IPR010713: Xyloglucan endo-transglycosylase, C-terminal; IPR013320: Concanavalin A-like lectin/glucanase domain; IPR016455: Xyloglucan endotransglucosylase/hydrolase	GO:0004553 MF: hydrolase activity, hydrolyzing O-glycosyl compounds;GO:0005618 CC: cell wall;GO:0005975 BP: carbohydrate metabolic process;GO:0006073 BP: cellular glucan metabolic process;GO:0010411 BP: xyloglucan metabolic process;GO:0016762 MF: xyloglucan:xyloglucosyl transferase activity;GO:0042546 BP: cell wall biogenesis;GO:0048046 CC: apoplast	IPR000757; IPR008263; IPR008264; IPR010713; IPR013320; IPR016455	GO:0004553; GO:0005618; GO:0005975; GO:0006073; GO:0010411; GO:0016762; GO:0042546; GO:0048046
Repair, protection and cell wall modification	7B_Nb3_D_SDW_W135_AGKP.AX-109328820	Drought	TraesCS7B01G327200.1	Xyloglucan endotransglucosylase/hydrolase	PF00722: Glycosyl hydrolases family 16; PF06955: Xyloglucan endo-transglycosylase (XET) C-terminus	IPR000757: Glycoside hydrolase family 16; IPR008263: Glycoside hydrolase, family 16, active site; IPR008264: Beta-glucanase; IPR010713: Xyloglucan endo-transglycosylase, C-terminal; IPR013320: Concanavalin A-like lectin/glucanase domain; IPR016455: Xyloglucan endotransglucosylase/hydrolase	GO:0004553 MF: hydrolase activity, hydrolyzing O-glycosyl compounds;GO:0005618 CC: cell wall;GO:0005975 BP: carbohydrate metabolic process;GO:0006073 BP: cellular glucan metabolic process;GO:0010411 BP: xyloglucan metabolic process;GO:0016762 MF: xyloglucan:xyloglucosyl transferase activity;GO:0042546 BP: cell wall biogenesis;GO:0048046 CC: apoplast	IPR000757; IPR008263; IPR008264; IPR010713; IPR013320; IPR016455	GO:0004553; GO:0005618; GO:0005975; GO:0006073; GO:0010411; GO:0016762; GO:0042546; GO:0048046
Repair, protection and cell wall modification	7B_Nb3_D_SDW_W135_AGKP.AX-109328820	Drought	TraesCS7B01G327400.1	Xyloglucan endotransglucosylase/hydrolase	PF00722: Glycosyl hydrolases family 16; PF06955: Xyloglucan endo-transglycosylase (XET) C-terminus	IPR000757: Glycoside hydrolase family 16; IPR008263: Glycoside hydrolase, family 16, active site; IPR008264: Beta-glucanase; IPR010713: Xyloglucan endo-transglycosylase, C-terminal; IPR013320: Concanavalin A-like lectin/glucanase domain; IPR016455: Xyloglucan endotransglucosylase/hydrolase	GO:0004553 MF: hydrolase activity, hydrolyzing O-glycosyl compounds;GO:0005618 CC: cell wall;GO:0005975 BP: carbohydrate metabolic process;GO:0006073 BP: cellular glucan metabolic process;GO:0010411 BP: xyloglucan metabolic process;GO:0016762 MF: xyloglucan:xyloglucosyl transferase activity;GO:0042546 BP: cell wall biogenesis;GO:0048046 CC: apoplast	IPR000757; IPR008263; IPR008264; IPR010713; IPR013320; IPR016455	GO:0004553; GO:0005618; GO:0005975; GO:0006073; GO:0010411; GO:0016762; GO:0042546; GO:0048046
Repair, protection and cell wall modification	7B_Nb3_D_SDW_W135_AGKP.AX-109328820	Drought	TraesCS7B01G327500.1	Xyloglucan endotransglucosylase/hydrolase	PF00722: Glycosyl hydrolases family 16; PF06955: Xyloglucan endo-transglycosylase (XET) C-terminus	IPR000757: Glycoside hydrolase family 16; IPR008263: Glycoside hydrolase, family 16, active site; IPR010713: Xyloglucan endo-transglycosylase, C-terminal; IPR013320: Concanavalin A-like lectin/glucanase domain; IPR016455: Xyloglucan endotransglucosylase/hydrolase	GO:0004553 MF: hydrolase activity, hydrolyzing O-glycosyl compounds;GO:0005618 CC: cell wall;GO:0005975 BP: carbohydrate metabolic process;GO:0006073 BP: cellular glucan metabolic process;GO:0010411 BP: xyloglucan metabolic process;GO:0016762 MF: xyloglucan:xyloglucosyl transferase activity;GO:0042546 BP: cell wall biogenesis;GO:0048046 CC: apoplast	IPR000757; IPR008263; IPR010713; IPR013320; IPR016455	GO:0004553; GO:0005618; GO:0005975; GO:0006073; GO:0010411; GO:0016762; GO:0042546; GO:0048046
Signal transduction	7B_Nb3_D_SDW_W135_AGKP.AX-109328820	Drought	TraesCS7B01G327600.1	Inositol polyphosphate multikinase	PF03770: Inositol polyphosphate kinase	IPR005522: Inositol polyphosphate kinase	GO:0008440 MF: inositol-1,4,5-trisphosphate 3-kinase activity	IPR005522	GO:0008440
Repair, protection and cell wall modification	7B_Nb3_D_SDW_W135_AGKP.AX-109328820	Drought	TraesCS7B01G327700.1	Xyloglucan endotransglucosylase/hydrolase	PF00722: Glycosyl hydrolases family 16; PF06955: Xyloglucan endo-transglycosylase (XET) C-terminus	IPR000757: Glycoside hydrolase family 16; IPR008263: Glycoside hydrolase, family 16, active site; IPR010713: Xyloglucan endo-transglycosylase, C-terminal; IPR013320: Concanavalin A-like lectin/glucanase domain; IPR016455: Xyloglucan endotransglucosylase/hydrolase	GO:0004553 MF: hydrolase activity, hydrolyzing O-glycosyl compounds;GO:0005618 CC: cell wall;GO:0005975 BP: carbohydrate metabolic process;GO:0006073 BP: cellular glucan metabolic process;GO:0010411 BP: xyloglucan metabolic process;GO:0016762 MF: xyloglucan:xyloglucosyl transferase activity;GO:0042546 BP: cell wall biogenesis;GO:0048046 CC: apoplast	IPR000757; IPR008263; IPR010713; IPR013320; IPR016455	GO:0004553; GO:0005618; GO:0005975; GO:0006073; GO:0010411; GO:0016762; GO:0042546; GO:0048046
Antiporter and transmembrane proteins	7B_Nb3_D_SDW_W135_AGKP.AX-109328820	Drought	TraesCS7B01G327800.1	Ring finger protein, putative	PF13639: Ring finger domain	IPR001841: Zinc finger, RING-type; IPR007110: Immunoglobulin-like domain; IPR013083: Zinc finger, RING/FYVE/PHD-type	GO:0005515 MF: protein binding;GO:0008270 MF: zinc ion binding	IPR001841; IPR007110; IPR013083	GO:0005515; GO:0008270
Antiporter and transmembrane proteins	7B_Nb3_D_SDW_W135_AGKP.AX-109328820	Drought	TraesCS7B01G327900.1	Phosphate import ATP-binding protein PstB	PF00005: ABC transporter	IPR003439: ABC transporter-like; IPR003593: AAA+ ATPase domain; IPR017871: ABC transporter, conserved site; IPR027417: P-loop containing nucleoside triphosphate hydrolase	GO:0005524 MF: ATP binding;GO:0016887 MF: ATPase activity	IPR003439; IPR003593; IPR017871; IPR027417	GO:0005524; GO:0016887
Signal transduction	7B_Nb3_D_SDW_W135_AGKP.AX-109328820	Drought	TraesCS7B01G328100.1	Plant calmodulin-binding protein-like protein	PF07839: Plant calmodulin-binding domain	IPR012417: Calmodulin-binding domain, plant	GO:0005516 MF: calmodulin binding	IPR012417	GO:0005516
Repair, protection and cell wall modification	7B_Nb3_D_SDW_W135_AGKP.AX-109328820	Drought	TraesCS7B01G328200.1	BTB-POZ and MATH domain protein	NA	IPR002083: MATH/TRAF domain; IPR008974: TRAF-like	GO:0005515 MF: protein binding	IPR002083; IPR008974	GO:0005515
Redox homeostasis and detoxification	7B_Nb3_D_SDW_W135_AGKP.AX-109328820	Drought	TraesCS7B01G328400.1	Peroxidase	PF00141: Peroxidase	IPR000823: Plant peroxidase; IPR002016: Haem peroxidase, plant/fungal/bacterial; IPR010255: Haem peroxidase; IPR019793: Peroxidases heam-ligand binding site; IPR019794: Peroxidase, active site	GO:0004601 MF: peroxidase activity;GO:0006979 BP: response to oxidative stress;GO:0020037 MF: heme binding;GO:0055114 BP: oxidation-reduction process	IPR000823; IPR002016; IPR010255; IPR019793; IPR019794	GO:0004601; GO:0006979; GO:0020037; GO:0055114
Antiporter and transmembrane proteins	7B_Nb3_D_SDW_W135_AGKP.AX-109328820	Drought	TraesCS7B01G328500.1	RING/U-box superfamily protein	PF13639: Ring finger domain	IPR001841: Zinc finger, RING-type; IPR013083: Zinc finger, RING/FYVE/PHD-type	GO:0005515 MF: protein binding;GO:0008270 MF: zinc ion binding	IPR001841; IPR013083	GO:0005515; GO:0008270
Redox homeostasis and detoxification	7B_Nb3_D_SDW_W135_AGKP.AX-109328820	Drought	TraesCS7B01G328600.1	Peroxidase	PF00141: Peroxidase	IPR000823: Plant peroxidase; IPR002016: Haem peroxidase, plant/fungal/bacterial; IPR010255: Haem peroxidase; IPR019793: Peroxidases heam-ligand binding site; IPR019794: Peroxidase, active site	GO:0004601 MF: peroxidase activity;GO:0006979 BP: response to oxidative stress;GO:0020037 MF: heme binding;GO:0055114 BP: oxidation-reduction process	IPR000823; IPR002016; IPR010255; IPR019793; IPR019794	GO:0004601; GO:0006979; GO:0020037; GO:0055114
Antiporter and transmembrane proteins	7B_Nb3_D_SDW_W135_AGKP.AX-109328820	Drought	TraesCS7B01G328700.1	High-affinity nitrate transporter 2.2	PF07690: Major Facilitator Superfamily	IPR005829: Sugar transporter, conserved site; IPR011701: Major facilitator superfamily; IPR020846: Major facilitator superfamily domain	GO:0005215 MF: transporter activity;GO:0016021 CC: integral component of membrane;GO:0055085 BP: transmembrane transport	IPR005829; IPR011701; IPR020846	GO:0005215; GO:0016021; GO:0055085
Signal transduction	7B_Nb3_D_SDW_W135_AGKP.AX-109328820	Drought	TraesCS7B01G328800.1	Serine/threonine-protein kinase	PF00954: S-locus glycoprotein domain; PF08276: PAN-like domain; PF00069: Protein kinase domain	IPR000719: Protein kinase domain; IPR000858: S-locus glycoprotein domain; IPR003609: PAN/Apple domain; IPR008271: Serine/threonine-protein kinase, active site; IPR011009: Protein kinase-like domain	GO:0004672 MF: protein kinase activity;GO:0005524 MF: ATP binding;GO:0006468 BP: protein phosphorylation;GO:0048544 BP: recognition of pollen	IPR000719; IPR000858; IPR003609; IPR008271; IPR011009	GO:0004672; GO:0005524; GO:0006468; GO:0048544
Others	7B_Nb3_D_SDW_W135_AGKP.AX-109328820	Drought	TraesCS7B01G328900.1	ARM repeat superfamily protein	NA	IPR011989: Armadillo-like helical; IPR016024: Armadillo-type fold	GO:0005488 MF: binding	IPR011989; IPR016024	GO:0005488
Others	7B_Nb3_D_SDW_W135_AGKP.AX-109328820	Drought	TraesCS7B01G329000.1	GDSL esterase/lipase	PF00657: GDSL-like Lipase/Acylhydrolase	IPR001087: GDSL lipase/esterase; IPR013830: SGNH hydrolase-type esterase domain	GO:0016788 MF: hydrolase activity, acting on ester bonds	IPR001087; IPR013830	GO:0016788
Others	7B_Nb3_D_SDW_W135_AGKP.AX-109328820	Drought	TraesCS7B01G329200.1	GDSL esterase/lipase	PF00657: GDSL-like Lipase/Acylhydrolase	IPR001087: GDSL lipase/esterase; IPR013830: SGNH hydrolase-type esterase domain	GO:0016788 MF: hydrolase activity, acting on ester bonds	IPR001087; IPR013830	GO:0016788
Antiporter and transmembrane proteins	7B_Nb3_D_SDW_W135_AGKP.AX-109328820	Drought	TraesCS7B01G329300.1	Pentatricopeptide repeat-containing protein	PF01535: PPR repeat; PF13041: PPR repeat family; PF14432: DYW family of nucleic acid deaminases	IPR002885: Pentatricopeptide repeat; IPR011990: Tetratricopeptide-like helical domain; IPR032867: DYW domain	GO:0005515 MF: protein binding;GO:0008270 MF: zinc ion binding	IPR002885; IPR011990; IPR032867	GO:0005515; GO:0008270
Others	7B_Nb3_D_SDW_W135_AGKP.AX-109328820	Drought	TraesCS7B01G329500.1	Fe/S biogenesis protein nfuA	PF01106: NifU-like domain	IPR001075: NIF system FeS cluster assembly, NifU, C-terminal	GO:0005506 MF: iron ion binding;GO:0016226 BP: iron-sulfur cluster assembly;GO:0051536 MF: iron-sulfur cluster binding	IPR001075	GO:0005506; GO:0016226; GO:0051536
Others	7B_Nb3_D_SDW_W135_AGKP.AX-109328820	Drought	TraesCS7B01G329600.1	Pentatricopeptide repeat-containing protein	PF01535: PPR repeat; PF13041: PPR repeat family; PF13812: Pentatricopeptide repeat domain	IPR002885: Pentatricopeptide repeat; IPR011990: Tetratricopeptide-like helical domain	GO:0005515 MF: protein binding	IPR002885; IPR011990	GO:0005515
Signal transduction	7B_Nb3_D_SDW_W135_AGKP.AX-109328820	Drought	TraesCS7B01G329700.1	F-box family protein	PF00646: F-box domain	IPR001810: F-box domain; IPR032675: Leucine-rich repeat domain, L domain-like	GO:0005515 MF: protein binding	IPR001810; IPR032675	GO:0005515
Others	7B_Nb3_D_SDW_W135_AGKP.AX-109328820	Drought	TraesCS7B01G329900.1	GDSL esterase/lipase	PF00657: GDSL-like Lipase/Acylhydrolase	IPR001087: GDSL lipase/esterase; IPR013830: SGNH hydrolase-type esterase domain	GO:0016788 MF: hydrolase activity, acting on ester bonds	IPR001087; IPR013830	GO:0016788
Others	7B_Nb3_D_SDW_W135_AGKP.AX-109328820	Drought	TraesCS7B01G330000.1	ARM repeat superfamily protein	NA	IPR011989: Armadillo-like helical; IPR016024: Armadillo-type fold	GO:0005488 MF: binding	IPR011989; IPR016024	GO:0005488
Signal transduction	7B_Nb3_D_SDW_W135_AGKP.AX-109328820	Drought	TraesCS7B01G330100.1	Serine/threonine-protein kinase	PF00954: S-locus glycoprotein domain; PF08276: PAN-like domain; PF00069: Protein kinase domain	IPR000719: Protein kinase domain; IPR000858: S-locus glycoprotein domain; IPR003609: PAN/Apple domain; IPR008271: Serine/threonine-protein kinase, active site; IPR011009: Protein kinase-like domain; IPR017441: Protein kinase, ATP binding site	GO:0004672 MF: protein kinase activity;GO:0005524 MF: ATP binding;GO:0006468 BP: protein phosphorylation;GO:0048544 BP: recognition of pollen	IPR000719; IPR000858; IPR003609; IPR008271; IPR011009; IPR017441	GO:0004672; GO:0005524; GO:0006468; GO:0048544
Signal transduction	7B_Nb3_D_SDW_W135_AGKP.AX-109328820	Drought	TraesCS7B01G330200.1	Serine/threonine-protein kinase	PF00069: Protein kinase domain	IPR000719: Protein kinase domain; IPR008271: Serine/threonine-protein kinase, active site; IPR011009: Protein kinase-like domain	GO:0004672 MF: protein kinase activity;GO:0005524 MF: ATP binding;GO:0006468 BP: protein phosphorylation	IPR000719; IPR008271; IPR011009	GO:0004672; GO:0005524; GO:0006468
Antiporter and transmembrane proteins	7B_Nb3_D_SDW_W135_AGKP.AX-109328820	Drought	TraesCS7B01G330800.1	Sugar transporter family protein	PF00083: Sugar (and other) transporter	IPR003663: Sugar/inositol transporter; IPR005828: Major facilitator, sugar transporter-like; IPR005829: Sugar transporter, conserved site; IPR020846: Major facilitator superfamily domain	GO:0005215 MF: transporter activity;GO:0016020 CC: membrane;GO:0016021 CC: integral component of membrane;GO:0022857 MF: transmembrane transporter activity;GO:0022891 MF: substrate-specific transmembrane transporter activity;GO:0055085 BP: transmembrane transport	IPR003663; IPR005828; IPR005829; IPR020846	GO:0005215; GO:0016020; GO:0016021; GO:0022857; GO:0022891; GO:0055085
Osmo-protectant synthesis related protein	7B_Nb3_D_SDW_W135_AGKP.AX-109328820	Drought	TraesCS7B01G331000.1	Ribosomal RNA large subunit methyltransferase E	PF01728: FtsJ-like methyltransferase; PF11861: Domain of unknown function (DUF3381)	IPR002877: Ribosomal RNA methyltransferase FtsJ domain; IPR015507: Ribosomal RNA large subunit methyltransferase E; IPR024576: Ribosomal RNA methyltransferase Spb1, domain of unknown function DUF3381; IPR029063: S-adenosyl-L-methionine-dependent methyltransferase	GO:0001510 BP: RNA methylation;GO:0008168 MF: methyltransferase activity;GO:0032259 BP: methylation	IPR002877; IPR015507; IPR024576; IPR029063	GO:0001510; GO:0008168; GO:0032259
Antiporter and transmembrane proteins	7B_Nb3_D_SDW_W135_AGKP.AX-109328820	Drought	TraesCS7B01G331500.1	Auxin efflux carrier component	PF03547: Membrane transport protein	IPR004776: Membrane transport protein; IPR014024: Auxin efflux carrier, plant type	GO:0016021 CC: integral component of membrane;GO:0055085 BP: transmembrane transport	IPR004776; IPR014024	GO:0016021; GO:0055085
Signal transduction	7B_Nb3_D_SDW_W135_AGKP.AX-109328820	Drought	TraesCS7B01G331800.1	Serine/threonine-protein kinase	PF00954: S-locus glycoprotein domain; PF08276: PAN-like domain; PF00069: Protein kinase domain	IPR000719: Protein kinase domain; IPR000858: S-locus glycoprotein domain; IPR003609: PAN/Apple domain; IPR008271: Serine/threonine-protein kinase, active site; IPR011009: Protein kinase-like domain	GO:0004672 MF: protein kinase activity;GO:0005524 MF: ATP binding;GO:0006468 BP: protein phosphorylation;GO:0048544 BP: recognition of pollen	IPR000719; IPR000858; IPR003609; IPR008271; IPR011009	GO:0004672; GO:0005524; GO:0006468; GO:0048544
Redox homeostasis and detoxification	7B_Nb3_D_SDW_W135_AGKP.AX-109328820	Drought	TraesCS7B01G332000.1	Transcription elongation factor (TFIIS) family protein	PF08711: TFIIS helical bundle-like domain	IPR017923: Transcription factor IIS, N-terminal	GO:0005634 CC: nucleus	IPR017923	GO:0005634
Redox homeostasis and detoxification	7B_Nb3_D_SDW_W135_AGKP.AX-109328820	Drought	TraesCS7B01G332100.1	Transcription elongation factor (TFIIS) family protein	PF08711: TFIIS helical bundle-like domain	IPR017923: Transcription factor IIS, N-terminal	GO:0005634 CC: nucleus	IPR017923	GO:0005634
Signal transduction	7B_Nb5_K_KNSp_W15_ACWV.BS00101408_51	Rainfed	TraesCS7B01G388000.3	Receptor-like kinase	PF00069: Protein kinase domain	IPR000719: Protein kinase domain; IPR008271: Serine/threonine-protein kinase, active site; IPR011009: Protein kinase-like domain; IPR017441: Protein kinase, ATP binding site	GO:0004672 MF: protein kinase activity;GO:0005524 MF: ATP binding;GO:0006468 BP: protein phosphorylation	IPR000719; IPR008271; IPR011009; IPR017441	GO:0004672; GO:0005524; GO:0006468
Redox homeostasis and detoxification	7B_Nb5_K_KNSp_W15_ACWV.BS00101408_51	Rainfed	TraesCS7B01G388200.1	FAD-binding Berberine family protein	PF01565: FAD binding domain; PF08031: Berberine and berberine like	IPR006094: FAD linked oxidase, N-terminal; IPR012951: Berberine/berberine-like; IPR016166: FAD-binding, type 2; IPR016167: FAD-binding, type 2, subdomain 1; IPR016169: CO dehydrogenase flavoprotein-like, FAD-binding, subdomain 2	GO:0003824 MF: catalytic activity;GO:0016491 MF: oxidoreductase activity;GO:0016614 MF: oxidoreductase activity, acting on CH-OH group of donors;GO:0050660 MF: flavin adenine dinucleotide binding;GO:0055114 BP: oxidation-reduction process	IPR006094; IPR012951; IPR016166; IPR016167; IPR016169	GO:0003824; GO:0016491; GO:0016614; GO:0050660; GO:0055114
Others	7B_Nb5_K_KNSp_W15_ACWV.BS00101408_51	Rainfed	TraesCS7B01G388500.1	WAT1-related protein	PF00892: EamA-like transporter family	IPR000620: EamA domain	GO:0016020 CC: membrane;GO:0016021 CC: integral component of membrane	IPR000620	GO:0016020; GO:0016021
Signal transduction	7B_Nb5_K_KNSp_W15_ACWV.BS00101408_51	Rainfed	TraesCS7B01G388600.1	Serine/threonine-protein kinase	PF01453: D-mannose binding lectin; PF00954: S-locus glycoprotein domain; PF08276: PAN-like domain; PF07714: Protein tyrosine kinase	IPR000719: Protein kinase domain; IPR000858: S-locus glycoprotein domain; IPR001245: Serine-threonine/tyrosine-protein kinase, catalytic domain; IPR001480: Bulb-type lectin domain; IPR003609: PAN/Apple domain; IPR008271: Serine/threonine-protein kinase, active site; IPR011009: Protein kinase-like domain; IPR017441: Protein kinase, ATP binding site; IPR024171: S-receptor-like serine/threonine-prot…	GO:0004672 MF: protein kinase activity;GO:0004674 MF: protein serine/threonine kinase activity;GO:0005524 MF: ATP binding;GO:0006468 BP: protein phosphorylation;GO:0048544 BP: recognition of pollen	IPR000719; IPR000858; IPR001245; IPR001480; IPR003609; IPR008271; IPR011009; IPR017441; IPR024171	GO:0004672; GO:0004674; GO:0005524; GO:0006468; GO:0048544
Stress and defense related proteins/ Chaperone	7B_Nb5_K_KNSp_W15_ACWV.BS00101408_51	Rainfed	TraesCS7B01G388700.4	BAG family molecular chaperone regulator 6	PF02179: BAG domain	IPR000048: IQ motif, EF-hand binding site; IPR003103: BAG domain	GO:0005515 MF: protein binding;GO:0051087 MF: chaperone binding	IPR000048; IPR003103	GO:0005515; GO:0051087
Osmo-protectant synthesis related protein	7B_Nb5_K_KNSp_W15_ACWV.BS00101408_51	Rainfed	TraesCS7B01G388900.1	Methionyl-tRNA formyltransferase	NA	IPR006501: Pectinesterase inhibitor domain	GO:0004857 MF: enzyme inhibitor activity	IPR006501	GO:0004857
Antiporter and transmembrane proteins	7B_Nb5_K_KNSp_W15_ACWV.BS00101408_51	Rainfed	TraesCS7B01G389000.1	zinc ion binding protein	PF04043: Plant invertase/pectin methylesterase inhibitor	IPR006501: Pectinesterase inhibitor domain	GO:0004857 MF: enzyme inhibitor activity	IPR006501	GO:0004857
Others	7B_Nb5_K_KNSp_W15_ACWV.BS00101408_51	Rainfed	TraesCS7B01G389100.1	Sec23/Sec24 protein transport family protein	NA	IPR006501: Pectinesterase inhibitor domain	GO:0004857 MF: enzyme inhibitor activity	IPR006501	GO:0004857
Antiporter and transmembrane proteins	7B_Nb5_K_KNSp_W15_ACWV.BS00101408_51	Rainfed	TraesCS7B01G389900.1	zinc ion binding protein	NA	IPR006501: Pectinesterase inhibitor domain	GO:0004857 MF: enzyme inhibitor activity	IPR006501	GO:0004857
Antiporter and transmembrane proteins	7B_Nb5_K_KNSp_W15_ACWV.BS00101408_51	Rainfed	TraesCS7B01G390000.1	E3 ubiquitin-protein ligase	PF13920: Zinc finger, C3HC4 type (RING finger)	IPR001841: Zinc finger, RING-type	GO:0005515 MF: protein binding;GO:0008270 MF: zinc ion binding	IPR001841	GO:0005515; GO:0008270
Repair, protection and cell wall modification	7B_Nb5_K_KNSp_W15_ACWV.BS00101408_51	Rainfed	TraesCS7B01G390100.1	Endonuclease V family protein	PF04493: Endonuclease V	IPR007581: Endonuclease V	GO:0004519 MF: endonuclease activity;GO:0006281 BP: DNA repair	IPR007581	GO:0004519; GO:0006281
Signal transduction	7B_Nb5_K_KNSp_W15_ACWV.BS00101408_51	Rainfed	TraesCS7B01G390400.1	F-box protein	PF00646: F-box domain	IPR001810: F-box domain; IPR015943: WD40/YVTN repeat-like-containing domain	GO:0005515 MF: protein binding	IPR001810; IPR015943	GO:0005515
Signal transduction	7B_Nb5_K_KNSp_W15_ACWV.BS00101408_51	Rainfed	TraesCS7B01G390500.1	F-box protein	PF00646: F-box domain	IPR001810: F-box domain	GO:0005515 MF: protein binding	IPR001810	GO:0005515
Signal transduction	7B_Nb5_K_KNSp_W15_ACWV.BS00101408_51	Rainfed	TraesCS7B01G390600.1	F-box protein	PF00646: F-box domain	IPR001810: F-box domain	GO:0005515 MF: protein binding	IPR001810	GO:0005515
Antiporter and transmembrane proteins	7B_Nb5_K_KNSp_W15_ACWV.BS00101408_51	Rainfed	TraesCS7B01G390800.1	Ubiquitin	PF00240: Ubiquitin family; PF01020: Ribosomal L40e family	IPR000626: Ubiquitin domain; IPR001975: Ribosomal protein L40e; IPR011332: Zinc-binding ribosomal protein; IPR019954: Ubiquitin conserved site; IPR019956: Ubiquitin; IPR029071: Ubiquitin-related domain	GO:0003735 MF: structural constituent of ribosome;GO:0005515 MF: protein binding;GO:0005840 CC: ribosome;GO:0006412 BP: translation	IPR000626; IPR001975; IPR011332; IPR019954; IPR019956; IPR029071	GO:0003735; GO:0005515; GO:0005840; GO:0006412
Antiporter and transmembrane proteins	7B_Nb5_K_KNSp_W15_ACWV.BS00101408_51	Rainfed	TraesCS7B01G390900.1	Ubiquitin	PF00240: Ubiquitin family; PF01020: Ribosomal L40e family	IPR000626: Ubiquitin domain; IPR001975: Ribosomal protein L40e; IPR011332: Zinc-binding ribosomal protein; IPR019954: Ubiquitin conserved site; IPR019956: Ubiquitin; IPR029071: Ubiquitin-related domain	GO:0003735 MF: structural constituent of ribosome;GO:0005515 MF: protein binding;GO:0005840 CC: ribosome;GO:0006412 BP: translation	IPR000626; IPR001975; IPR011332; IPR019954; IPR019956; IPR029071	GO:0003735; GO:0005515; GO:0005840; GO:0006412
Redox homeostasis and detoxification	7B_Nb5_K_KNSp_W15_ACWV.BS00101408_51	Rainfed	TraesCS7B01G391000.1	F-box family protein	PF12937: F-box-like	IPR001810: F-box domain; IPR011043: Galactose oxidase/kelch, beta-propeller; IPR015915: Kelch-type beta propeller	GO:0005515 MF: protein binding	IPR001810; IPR011043; IPR015915	GO:0005515
Osmo-protectant synthesis related protein	7B_Nb5_K_KNSp_W15_ACWV.BS00101408_51	Rainfed	TraesCS7B01G391100.2	tRNA pseudouridine synthase A	PF01416: tRNA pseudouridine synthase	IPR020095: Pseudouridine synthase I, TruA, C-terminal; IPR020097: Pseudouridine synthase I, TruA, alpha/beta domain; IPR020103: Pseudouridine synthase, catalytic domain	GO:0001522 BP: pseudouridine synthesis;GO:0003723 MF: RNA binding;GO:0009451 BP: RNA modification;GO:0009982 MF: pseudouridine synthase activity	IPR020095; IPR020097; IPR020103	GO:0001522; GO:0003723; GO:0009451; GO:0009982
Signal transduction	7B_Nb5_K_KNSp_W15_ACWV.BS00101408_51	Rainfed	TraesCS7B01G391200.1	Kinase family protein	PF00069: Protein kinase domain	IPR000719: Protein kinase domain; IPR008271: Serine/threonine-protein kinase, active site; IPR011009: Protein kinase-like domain; IPR017441: Protein kinase, ATP binding site	GO:0004672 MF: protein kinase activity;GO:0005524 MF: ATP binding;GO:0006468 BP: protein phosphorylation	IPR000719; IPR008271; IPR011009; IPR017441	GO:0004672; GO:0005524; GO:0006468
Signal transduction	7B_Nb5_K_KNSp_W15_ACWV.BS00101408_51	Rainfed	TraesCS7B01G391300.1	Protein kinase	PF07714: Protein tyrosine kinase	IPR000719: Protein kinase domain; IPR001245: Serine-threonine/tyrosine-protein kinase, catalytic domain; IPR008271: Serine/threonine-protein kinase, active site; IPR011009: Protein kinase-like domain	GO:0004672 MF: protein kinase activity;GO:0005524 MF: ATP binding;GO:0006468 BP: protein phosphorylation	IPR000719; IPR001245; IPR008271; IPR011009	GO:0004672; GO:0005524; GO:0006468
Others	7B_Nb5_K_KNSp_W15_ACWV.BS00101408_51	Rainfed	TraesCS7B01G391700.1	Subtilisin-like protease	PF05922: Peptidase inhibitor I9; PF00082: Subtilase family	IPR000209: Peptidase S8/S53 domain; IPR009020: Protease propeptides/proteinase inhibitor I9; IPR010259: Peptidase S8 propeptide/proteinase inhibitor I9; IPR015500: Peptidase S8, subtilisin-related	GO:0004252 MF: serine-type endopeptidase activity;GO:0006508 BP: proteolysis	IPR000209; IPR009020; IPR010259; IPR015500	GO:0004252; GO:0006508
Transcription factors and translation	7B_Nb5_K_KNSp_W15_ACWV.BS00101408_51	Rainfed	TraesCS7B01G391800.1	Basic-leucine zipper (BZIP) transcription factor family	PF00170: bZIP transcription factor	IPR004827: Basic-leucine zipper domain	GO:0003700 MF: transcription factor activity, sequence-specific DNA binding;GO:0006355 BP: regulation of transcription, DNA-templated;GO:0043565 MF: sequence-specific DNA binding	IPR004827	GO:0003700; GO:0006355; GO:0043565
Signal transduction	7B_Nb5_K_KNSp_W15_ACWV.BS00101408_51	Rainfed	TraesCS7B01G392000.1	Receptor-like protein kinase	PF08263: Leucine rich repeat N-terminal domain; PF00069: Protein kinase domain	IPR000719: Protein kinase domain; IPR011009: Protein kinase-like domain; IPR013210: Leucine-rich repeat-containing N-terminal, plant-type; IPR032675: Leucine-rich repeat domain, L domain-like	GO:0004672 MF: protein kinase activity;GO:0005524 MF: ATP binding;GO:0006468 BP: protein phosphorylation	IPR000719; IPR011009; IPR013210; IPR032675	GO:0004672; GO:0005524; GO:0006468
Repair, protection and cell wall modification	3A_YR.AX-158612374	Breeding progress	TraesCS3A01G273500.1	Dynamin-like	PF00350: Dynamin family	IPR001401: Dynamin, GTPase domain; IPR022812: Dynamin superfamily; IPR027417: P-loop containing nucleoside triphosphate hydrolase; IPR030381: Dynamin-type guanine nucleotide-binding (G) domain	GO:0003924 MF: GTPase activity;GO:0005525 MF: GTP binding	IPR001401; IPR022812; IPR027417; IPR030381	GO:0003924; GO:0005525
Others	3A_YR.AX-158612374	Breeding progress	TraesCS3A01G273600.1	VQ motif-containing protein	PF05678: VQ motif	IPR008889: VQ	NA	IPR008889	NA
Translation regulation	3A_YR.AX-158612374	Breeding progress	TraesCS3A01G273700.1	RNA-binding S4 domain-containing protein	PF01479: S4 domain	IPR002942: RNA-binding S4 domain; IPR017506: Photosystem II S4	GO:0003723 MF: RNA binding	IPR002942; IPR017506	GO:0003723
Others	3A_YR.AX-158612374	Breeding progress	TraesCS3A01G273800.1	Pentatricopeptide repeat-containing protein, putative	PF13041: PPR repeat family; PF01535: PPR repeat	IPR002885: Pentatricopeptide repeat	NA	IPR002885	NA
Amino Acid Metabolism	3A_YR.AX-158612374	Breeding progress	TraesCS3A01G273900.1	Dihydroorotase	PF01979: Amidohydrolase family	IPR002195: Dihydroorotase, conserved site; IPR004721: Dihydroorotase homodimeric type; IPR006680: Amidohydrolase-related; IPR032466: Metal-dependent hydrolase	GO:0004151 MF: dihydroorotase activity;GO:0016787 MF: hydrolase activity;GO:0016812 MF: hydrolase activity, acting on carbon-nitrogen (but not peptide) bonds, in cyclic amides;GO:0019856 BP: pyrimidine nucleobase biosynthetic process	IPR002195; IPR004721; IPR006680; IPR032466	GO:0004151; GO:0016787; GO:0016812; GO:0019856
Signal transduction	3A_YR.AX-158612374	Breeding progress	TraesCS3A01G274000.1	Protein kinase	PF07714: Protein tyrosine kinase	IPR000719: Protein kinase domain; IPR001245: Serine-threonine/tyrosine-protein kinase, catalytic domain; IPR008271: Serine/threonine-protein kinase, active site; IPR011009: Protein kinase-like domain	GO:0004672 MF: protein kinase activity;GO:0005524 MF: ATP binding;GO:0006468 BP: protein phosphorylation	IPR000719; IPR001245; IPR008271; IPR011009	GO:0004672; GO:0005524; GO:0006468
Others	3A_YR.AX-158612374	Breeding progress	TraesCS3A01G274100.1	DUF506 family protein	PF04720: PDDEXK-like family of unknown function	IPR006502: Protein of unknown function PDDEXK-like	NA	IPR006502	NA
Others	3A_YR.AX-158612374	Breeding progress	TraesCS3A01G274200.1	Mannan endo-1,4-beta-mannosidase-like protein	PF00150: Cellulase (glycosyl hydrolase family 5)	IPR001547: Glycoside hydrolase, family 5; IPR017853: Glycoside hydrolase superfamily; IPR018087: Glycoside hydrolase, family 5, conserved site	GO:0004553 MF: hydrolase activity, hydrolyzing O-glycosyl compounds;GO:0005975 BP: carbohydrate metabolic process	IPR001547; IPR017853; IPR018087	GO:0004553; GO:0005975
Signal transduction	5D_YR.wsnp_Ex_c65985_64188864	Breeding progress	TraesCS5D01G105800.1	SKP1-like protein	PF03931: Skp1 family, tetramerisation domain; PF01466: Skp1 family, dimerisation domain	IPR001232: S-phase kinase-associated protein 1-like; IPR011333: SKP1/BTB/POZ domain; IPR016072: SKP1 component, dimerisation; IPR016073: SKP1 component, POZ domain; IPR016897: S-phase kinase-associated protein 1	GO:0006511 BP: ubiquitin-dependent protein catabolic process	IPR001232; IPR011333; IPR016072; IPR016073; IPR016897	GO:0006511
Redox homeostasis and detoxification	5D_YR.wsnp_Ex_c65985_64188864	Breeding progress	TraesCS5D01G105900.1	Respiratory burst oxidase, putative, expressed	PF08414: Respiratory burst NADPH oxidase; PF13405: EF-hand domain; PF01794: Ferric reductase like transmembrane component; PF08022: FAD-binding domain; PF08030: Ferric reductase NAD binding domain	IPR000778: Cytochrome b245, heavy chain; IPR002048: EF-hand domain; IPR011992: EF-hand domain pair; IPR013112: FAD-binding 8; IPR013121: Ferric reductase, NAD binding domain; IPR013130: Ferric reductase transmembrane component-like domain; IPR013623: NADPH oxidase Respiratory burst; IPR017927: Ferredoxin reductase-type FAD-binding domain; IPR017938: Riboflavin synthase-like beta-barrel; IPR018247…	GO:0004601 MF: peroxidase activity;GO:0005509 MF: calcium ion binding;GO:0016020 CC: membrane;GO:0016491 MF: oxidoreductase activity;GO:0050664 MF: oxidoreductase activity, acting on NAD(P)H, oxygen as acceptor;GO:0055114 BP: oxidation-reduction process	IPR000778; IPR002048; IPR011992; IPR013112; IPR013121; IPR013130; IPR013623; IPR017927; IPR017938; IPR018247	GO:0004601; GO:0005509; GO:0016020; GO:0016491; GO:0050664; GO:0055114
Signal transduction	5D_YR.wsnp_Ex_c65985_64188864	Breeding progress	TraesCS5D01G106000.1	GPI ethanolamine phosphate transferase	PF01663: Type I phosphodiesterase / nucleotide pyrophosphatase	IPR002591: Type I phosphodiesterase/nucleotide pyrophosphatase/phosphate transferase; IPR017849: Alkaline phosphatase-like, alpha/beta/alpha; IPR017850: Alkaline-phosphatase-like, core domain	GO:0003824 MF: catalytic activity;GO:0008152 BP: metabolic process	IPR002591; IPR017849; IPR017850	GO:0003824; GO:0008152
Signal transduction	5D_YR.wsnp_Ex_c65985_64188864	Breeding progress	TraesCS5D01G106100.1	Serine/threonine-protein phosphatase 7 long form-like protein	PF10536: Plant mobile domain	IPR019557: Aminotransferase-like, plant mobile domain	NA	IPR019557	NA
Antiporter and transmembrane proteins	5D_YR.wsnp_Ex_c65985_64188864	Breeding progress	TraesCS5D01G106200.1	Riboflavin synthase	PF00677: Lumazine binding domain	IPR001783: Lumazine-binding protein; IPR017938: Riboflavin synthase-like beta-barrel; IPR023366: ATP synthase subunit alpha-like domain; IPR026017: Lumazine-binding domain	GO:0016491 MF: oxidoreductase activity;GO:0055114 BP: oxidation-reduction process	IPR001783; IPR017938; IPR023366; IPR026017	GO:0016491; GO:0055114
Osmo-protectant synthesis related protein	5D_YR.wsnp_Ex_c65985_64188864	Breeding progress	TraesCS5D01G106300.1	Tryptophan--tRNA ligase	PF00579: tRNA synthetases class I (W and Y)	IPR001412: Aminoacyl-tRNA synthetase, class I, conserved site; IPR002305: Aminoacyl-tRNA synthetase, class Ic; IPR002306: Tryptophan-tRNA ligase; IPR014729: Rossmann-like alpha/beta/alpha sandwich fold	GO:0000166 MF: nucleotide binding;GO:0004812 MF: aminoacyl-tRNA ligase activity;GO:0004830 MF: tryptophan-tRNA ligase activity;GO:0005524 MF: ATP binding;GO:0005737 CC: cytoplasm;GO:0006418 BP: tRNA aminoacylation for protein translation;GO:0006436 BP: tryptophanyl-tRNA aminoacylation	IPR001412; IPR002305; IPR002306; IPR014729	GO:0000166; GO:0004812; GO:0004830; GO:0005524; GO:0005737; GO:0006418; GO:0006436
Redox homeostasis and detoxification	5D_YR.wsnp_Ex_c65985_64188864	Breeding progress	TraesCS5D01G106400.1	Acyl-CoA-binding domain-containing protein 4	PF01344: Kelch motif; PF13415: Galactose oxidase, central domain	IPR006652: Kelch repeat type 1; IPR011043: Galactose oxidase/kelch, beta-propeller; IPR015915: Kelch-type beta propeller; IPR015916: Galactose oxidase, beta-propeller	GO:0005515 MF: protein binding	IPR006652; IPR011043; IPR015915; IPR015916	GO:0005515
Redox homeostasis and detoxification	5D_YR.wsnp_Ex_c65985_64188864	Breeding progress	TraesCS5D01G106500.1	F-box protein	PF00646: F-box domain	IPR001810: F-box domain; IPR011043: Galactose oxidase/kelch, beta-propeller; IPR015915: Kelch-type beta propeller	GO:0005515 MF: protein binding	IPR001810; IPR011043; IPR015915	GO:0005515
Repair, protection and cell wall modification	5D_YR.wsnp_Ex_c65985_64188864	Breeding progress	TraesCS5D01G106600.1	Golgin candidate 6	PF04869: Uso1 / p115 like vesicle tethering protein, head region; PF04871: Uso1 / p115 like vesicle tethering protein, C terminal region	IPR006953: Vesicle tethering protein Uso1/P115-like , head domain; IPR006955: Uso1/p115-like vesicle tethering protein, C-terminal; IPR011989: Armadillo-like helical; IPR016024: Armadillo-type fold	GO:0000139 CC: Golgi membrane;GO:0005488 MF: binding;GO:0005737 CC: cytoplasm;GO:0006886 BP: intracellular protein transport;GO:0008565 MF: protein transporter activity;GO:0016020 CC: membrane;GO:0048280 BP: vesicle fusion with Golgi apparatus	IPR006953; IPR006955; IPR011989; IPR016024	GO:0000139; GO:0005488; GO:0005737; GO:0006886; GO:0008565; GO:0016020; GO:0048280
Redox homeostasis and detoxification	5D_YR.wsnp_Ex_c65985_64188864	Breeding progress	TraesCS5D01G106700.1	Acyl-CoA-binding domain-containing protein 4	PF01344: Kelch motif; PF13418: Galactose oxidase, central domain	IPR006652: Kelch repeat type 1; IPR015915: Kelch-type beta propeller	GO:0005515 MF: protein binding	IPR006652; IPR015915	GO:0005515
Redox homeostasis and detoxification	5D_YR.wsnp_Ex_c65985_64188864	Breeding progress	TraesCS5D01G106800.1	Glutaredoxin family protein	PF00462: Glutaredoxin	IPR002109: Glutaredoxin; IPR011905: Glutaredoxin-like, plant II; IPR012336: Thioredoxin-like fold	GO:0009055 MF: electron carrier activity;GO:0015035 MF: protein disulfide oxidoreductase activity;GO:0045454 BP: cell redox homeostasis	IPR002109; IPR011905; IPR012336	GO:0009055; GO:0015035; GO:0045454
Redox homeostasis and detoxification	5D_YR.wsnp_Ex_c65985_64188864	Breeding progress	TraesCS5D01G106900.1	Glutaredoxin family protein	PF00462: Glutaredoxin	IPR002109: Glutaredoxin; IPR011905: Glutaredoxin-like, plant II; IPR012336: Thioredoxin-like fold	GO:0009055 MF: electron carrier activity;GO:0015035 MF: protein disulfide oxidoreductase activity;GO:0045454 BP: cell redox homeostasis	IPR002109; IPR011905; IPR012336	GO:0009055; GO:0015035; GO:0045454
Others	5D_YR.wsnp_Ex_c65985_64188864	Breeding progress	TraesCS5D01G107000.1	Photosystem II reaction center protein K	PF02533: Photosystem II 4 kDa reaction centre component	IPR003687: Photosystem II PsbK	GO:0009523 CC: photosystem II;GO:0009539 CC: photosystem II reaction center;GO:0015979 BP: photosynthesis	IPR003687	GO:0009523; GO:0009539; GO:0015979
Others	5D_YR.wsnp_Ex_c65985_64188864	Breeding progress	TraesCS5D01G107100.1	Photosystem II reaction center protein I	PF02532: Photosystem II reaction centre I protein (PSII 4.8 kDa protein)	IPR003686: Photosystem II PsbI	GO:0009523 CC: photosystem II;GO:0009539 CC: photosystem II reaction center;GO:0015979 BP: photosynthesis;GO:0016020 CC: membrane	IPR003686	GO:0009523; GO:0009539; GO:0015979; GO:0016020
Redox homeostasis and detoxification	5D_YR.wsnp_Ex_c65985_64188864	Breeding progress	TraesCS5D01G107200.1	Glutaredoxin family protein	PF00462: Glutaredoxin	IPR002109: Glutaredoxin; IPR011905: Glutaredoxin-like, plant II; IPR012336: Thioredoxin-like fold	GO:0009055 MF: electron carrier activity;GO:0015035 MF: protein disulfide oxidoreductase activity;GO:0045454 BP: cell redox homeostasis	IPR002109; IPR011905; IPR012336	GO:0009055; GO:0015035; GO:0045454
Redox homeostasis and detoxification	5D_YR.wsnp_Ex_c65985_64188864	Breeding progress	TraesCS5D01G107300.1	Glutaredoxin family protein	PF00462: Glutaredoxin	IPR002109: Glutaredoxin; IPR011905: Glutaredoxin-like, plant II; IPR012336: Thioredoxin-like fold	GO:0009055 MF: electron carrier activity;GO:0015035 MF: protein disulfide oxidoreductase activity;GO:0045454 BP: cell redox homeostasis	IPR002109; IPR011905; IPR012336	GO:0009055; GO:0015035; GO:0045454
Redox homeostasis and detoxification	5D_YR.wsnp_Ex_c65985_64188864	Breeding progress	TraesCS5D01G107500.1	Glutaredoxin family protein	PF00462: Glutaredoxin	IPR002109: Glutaredoxin; IPR011905: Glutaredoxin-like, plant II; IPR012336: Thioredoxin-like fold	GO:0009055 MF: electron carrier activity;GO:0015035 MF: protein disulfide oxidoreductase activity;GO:0045454 BP: cell redox homeostasis	IPR002109; IPR011905; IPR012336	GO:0009055; GO:0015035; GO:0045454
Stress and defense related proteins/ Chaperone	5D_YR.wsnp_Ex_c65985_64188864	Breeding progress	TraesCS5D01G107600.1	RING finger and CHY zinc finger protein	PF05495: CHY zinc finger; PF13639: Ring finger domain; PF14599: Zinc-ribbon	IPR001841: Zinc finger, RING-type; IPR008913: Zinc finger, CHY-type; IPR013083: Zinc finger, RING/FYVE/PHD-type; IPR017921: Zinc finger, CTCHY-type	GO:0005515 MF: protein binding;GO:0008270 MF: zinc ion binding	IPR001841; IPR008913; IPR013083; IPR017921	GO:0005515; GO:0008270
Others	5D_YR.wsnp_Ex_c65985_64188864	Breeding progress	TraesCS5D01G107800.1	Conserved oligomeric Golgi complex subunit 8	PF04124: Dor1-like family	IPR007255: Conserved oligomeric Golgi complex subunit 8; IPR016159: Cullin repeat-like-containing domain; IPR016632: Conserved oligomeric Golgi complex subunit 8, Metazoal and Viridiplantae	GO:0017119 CC: Golgi transport complex	IPR007255; IPR016159; IPR016632	GO:0017119
Others	5D_YR.wsnp_Ex_c65985_64188864	Breeding progress	TraesCS5D01G107900.1	COBRA-like protein	PF04833: COBRA-like protein	IPR006918: COBRA, plant	GO:0010215 BP: cellulose microfibril organization;GO:0016049 BP: cell growth;GO:0031225 CC: anchored component of membrane	IPR006918	GO:0010215; GO:0016049; GO:0031225
rRNA processing	5D_YR.wsnp_Ex_c65985_64188864	Breeding progress	TraesCS5D01G108000.1	rRNA-processing protein FYV7	PF08524: rRNA processing	IPR013730: Fyv7/TAP26	NA	IPR013730	NA
Redox homeostasis and detoxification	5D_YR.wsnp_Ex_c65985_64188864	Breeding progress	TraesCS5D01G108100.1	Glutaredoxin family protein	PF00462: Glutaredoxin	IPR002109: Glutaredoxin; IPR011905: Glutaredoxin-like, plant II; IPR012336: Thioredoxin-like fold	GO:0009055 MF: electron carrier activity;GO:0015035 MF: protein disulfide oxidoreductase activity;GO:0045454 BP: cell redox homeostasis	IPR002109; IPR011905; IPR012336	GO:0009055; GO:0015035; GO:0045454
Signal transduction	5D_YR.wsnp_Ex_c65985_64188864	Breeding progress	TraesCS5D01G108500.1	2,3-bisphosphoglycerate-independent phosphoglycerate mutase	PF01676: Metalloenzyme superfamily; PF10143: 2,3-bisphosphoglycerate-independent phosphoglycerate mutase	IPR004456: 2,3-bisphosphoglycerate-independent phosphoglycerate mutase; IPR006124: Metalloenzyme; IPR017849: Alkaline phosphatase-like, alpha/beta/alpha; IPR017850: Alkaline-phosphatase-like, core domain	GO:0003824 MF: catalytic activity;GO:0008152 BP: metabolic process;GO:0046537 MF: 2,3-bisphosphoglycerate-independent phosphoglycerate mutase activity;GO:0046872 MF: metal ion binding	IPR004456; IPR006124; IPR017849; IPR017850	GO:0003824; GO:0008152; GO:0046537; GO:0046872
Regulation of transcription	5D_YR.wsnp_Ex_c65985_64188864	Breeding progress	TraesCS5D01G108600.1	RNA polymerase-associated RTF1-like protein	PF03126: Plus-3 domain	IPR004343: Plus-3 domain	GO:0003677 MF: DNA binding	IPR004343	GO:0003677
Others	5D_YR.wsnp_Ex_c65985_64188864	Breeding progress	TraesCS5D01G108700.1	Acyl carrier protein	PF00550: Phosphopantetheine attachment site	IPR003231: Acyl carrier protein (ACP); IPR006162: Phosphopantetheine attachment site; IPR009081: Phosphopantetheine binding ACP domain; IPR020806: Polyketide synthase, phosphopantetheine-binding domain	GO:0006633 BP: fatty acid biosynthetic process;GO:0031177 MF: phosphopantetheine binding	IPR003231; IPR006162; IPR009081; IPR020806	GO:0006633; GO:0031177
Others	5D_YR.wsnp_Ex_c65985_64188864	Breeding progress	TraesCS5D01G109000.1	GDSL esterase/lipase	PF00657: GDSL-like Lipase/Acylhydrolase	IPR001087: GDSL lipase/esterase; IPR013830: SGNH hydrolase-type esterase domain	GO:0016788 MF: hydrolase activity, acting on ester bonds	IPR001087; IPR013830	GO:0016788
Others	5D_YR.wsnp_Ex_c65985_64188864	Breeding progress	TraesCS5D01G109100.1	Nucleolar complex 3-like protein	PF07540: Nucleolar complex-associated protein; PF03914: CBF/Mak21 family	IPR005612: CCAAT-binding factor; IPR011501: Nucleolar complex-associated protein 3, N-terminal; IPR011989: Armadillo-like helical; IPR016024: Armadillo-type fold; IPR016903: Nucleolar complex-associated protein 3	GO:0005488 MF: binding	IPR005612; IPR011501; IPR011989; IPR016024; IPR016903	GO:0005488
Redox homeostasis and detoxification	5D_YR.wsnp_Ex_c65985_64188864	Breeding progress	TraesCS5D01G109200.1	Shikimate dehydrogenase (NADP(+))	PF01487: Type I 3-dehydroquinase; PF08501: Shikimate dehydrogenase substrate binding domain; PF01488: Shikimate / quinate 5-dehydrogenase	IPR001381: 3-dehydroquinate dehydratase type I; IPR006151: Quinate/shikimate 5-dehydrogenase/glutamyl-tRNA reductase; IPR011342: Shikimate dehydrogenase; IPR013708: Shikimate dehydrogenase substrate binding, N-terminal; IPR013785: Aldolase-type TIM barrel; IPR016040: NAD(P)-binding domain; IPR022893: Shikimate dehydrogenase family	GO:0003824 MF: catalytic activity;GO:0003855 MF: 3-dehydroquinate dehydratase activity;GO:0004764 MF: shikimate 3-dehydrogenase (NADP+) activity;GO:0019632 BP: shikimate metabolic process;GO:0050661 MF: NADP binding;GO:0055114 BP: oxidation-reduction process	IPR001381; IPR006151; IPR011342; IPR013708; IPR013785; IPR016040; IPR022893	GO:0003824; GO:0003855; GO:0004764; GO:0019632; GO:0050661; GO:0055114
Others	5D_YR.wsnp_Ex_c65985_64188864	Breeding progress	TraesCS5D01G109300.2	Mitochondrial carrier protein, expressed	PF00153: Mitochondrial carrier protein	IPR018108: Mitochondrial substrate/solute carrier; IPR023395: Mitochondrial carrier domain	NA	IPR018108; IPR023395	NA
Redox homeostasis and detoxification	5D_YR.wsnp_Ex_c65985_64188864	Breeding progress	TraesCS5D01G109400.1	Phenylalanine--tRNA ligase alpha subunit	PF01409: tRNA synthetases class II core domain (F); PF03147: Ferredoxin-fold anticodon binding domain	IPR002319: Phenylalanyl-tRNA synthetase; IPR005121: Ferrodoxin-fold anticodon-binding domain; IPR006195: Aminoacyl-tRNA synthetase, class II	GO:0000049 MF: tRNA binding;GO:0004812 MF: aminoacyl-tRNA ligase activity;GO:0005524 MF: ATP binding;GO:0005737 CC: cytoplasm;GO:0043039 BP: tRNA aminoacylation	IPR002319; IPR005121; IPR006195	GO:0000049; GO:0004812; GO:0005524; GO:0005737; GO:0043039
Transcription factors and translation	5D_YR.wsnp_Ex_c65985_64188864	Breeding progress	TraesCS5D01G109500.1	Syntaxin	PF00804: Syntaxin; PF05739: SNARE domain	IPR000727: Target SNARE coiled-coil homology domain; IPR006011: Syntaxin, N-terminal domain; IPR006012: Syntaxin/epimorphin, conserved site; IPR010989: SNARE	GO:0005484 MF: SNAP receptor activity;GO:0005515 MF: protein binding;GO:0006886 BP: intracellular protein transport;GO:0016020 CC: membrane;GO:0016192 BP: vesicle-mediated transport	IPR000727; IPR006011; IPR006012; IPR010989	GO:0005484; GO:0005515; GO:0006886; GO:0016020; GO:0016192
Transcription factors and translation	5D_YR.wsnp_Ex_c65985_64188864	Breeding progress	TraesCS5D01G109600.1	Protein VERNALIZATION INSENSITIVE 3	PF07227: PHD - plant homeodomain finger protein; PF00041: Fibronectin type III domain	IPR003961: Fibronectin type III; IPR013783: Immunoglobulin-like fold; IPR032881: Oberon, PHD finger domain	GO:0005515 MF: protein binding	IPR003961; IPR013783; IPR032881	GO:0005515
Others	5D_YR.wsnp_Ex_c65985_64188864	Breeding progress	TraesCS5D01G109700.1	Rho GTPase-activating protein	PF00786: P21-Rho-binding domain; PF00620: RhoGAP domain	IPR000095: CRIB domain; IPR000198: Rho GTPase-activating protein domain; IPR008936: Rho GTPase activation protein	GO:0007165 BP: signal transduction	IPR000095; IPR000198; IPR008936	GO:0007165
Redox homeostasis and detoxification	5D_YR.wsnp_Ex_c65985_64188864	Breeding progress	TraesCS5D01G109900.1	L-gulonolactone oxidase	PF01565: FAD binding domain; PF04030: D-arabinono-1,4-lactone oxidase	IPR006094: FAD linked oxidase, N-terminal; IPR007173: D-arabinono-1,4-lactone oxidase; IPR010030: L-gulonolactone oxidase, plant; IPR016166: FAD-binding, type 2; IPR016167: FAD-binding, type 2, subdomain 1; IPR016169: CO dehydrogenase flavoprotein-like, FAD-binding, subdomain 2; IPR016170: Vanillyl-alcohol oxidase/Cytokinin dehydrogenase C-terminal domain	GO:0003824 MF: catalytic activity;GO:0003885 MF: D-arabinono-1,4-lactone oxidase activity;GO:0016020 CC: membrane;GO:0016491 MF: oxidoreductase activity;GO:0016614 MF: oxidoreductase activity, acting on CH-OH group of donors;GO:0050660 MF: flavin adenine dinucleotide binding;GO:0055114 BP: oxidation-reduction process	IPR006094; IPR007173; IPR010030; IPR016166; IPR016167; IPR016169; IPR016170	GO:0003824; GO:0003885; GO:0016020; GO:0016491; GO:0016614; GO:0050660; GO:0055114
Redox homeostasis and detoxification	5D_YR.wsnp_Ex_c65985_64188864	Breeding progress	TraesCS5D01G110100.1	Peroxidase	PF00141: Peroxidase	IPR000823: Plant peroxidase; IPR002016: Haem peroxidase, plant/fungal/bacterial; IPR010255: Haem peroxidase; IPR019793: Peroxidases heam-ligand binding site	GO:0004601 MF: peroxidase activity;GO:0006979 BP: response to oxidative stress;GO:0020037 MF: heme binding;GO:0055114 BP: oxidation-reduction process	IPR000823; IPR002016; IPR010255; IPR019793	GO:0004601; GO:0006979; GO:0020037; GO:0055114
Others	5D_YR.wsnp_Ex_c65985_64188864	Breeding progress	TraesCS5D01G110200.1	Ankyrin repeat protein-like	PF12796: Ankyrin repeats (3 copies); PF00023: Ankyrin repeat; PF00515: Tetratricopeptide repeat	IPR001440: Tetratricopeptide repeat 1; IPR002110: Ankyrin repeat; IPR011990: Tetratricopeptide-like helical domain; IPR013026: Tetratricopeptide repeat-containing domain; IPR019734: Tetratricopeptide repeat; IPR020683: Ankyrin repeat-containing domain	GO:0005515 MF: protein binding	IPR001440; IPR002110; IPR011990; IPR013026; IPR019734; IPR020683	GO:0005515
Transcription factors and translation	5D_YR.wsnp_Ex_c65985_64188864	Breeding progress	TraesCS5D01G110300.1	Coiled-coil domain-containing protein 97	PF09747: Coiled-coil domain containing protein (DUF2052)	IPR018613: Protein of unknown function DUF2052, coiled-coil	NA	IPR018613	NA
chlorophyll metabolism	5D_YR.wsnp_Ex_c65985_64188864	Breeding progress	TraesCS5D01G110400.2	weak chloroplast movement under blue light protein (DUF827)	PF05701: Weak chloroplast movement under blue light	IPR008545: WEB family	NA	IPR008545	NA
Redox homeostasis and detoxification	5D_YR.wsnp_Ex_c65985_64188864	Breeding progress	TraesCS5D01G110600.1	Histone H2A	PF00125: Core histone H2A/H2B/H3/H4; PF16211: C-terminus of histone H2A	IPR002119: Histone H2A; IPR007125: Histone H2A/H2B/H3; IPR009072: Histone-fold; IPR032454: Histone H2A, C-terminal domain; IPR032458: Histone H2A conserved site	GO:0000786 CC: nucleosome;GO:0003677 MF: DNA binding;GO:0005634 CC: nucleus;GO:0046982 MF: protein heterodimerization activity	IPR002119; IPR007125; IPR009072; IPR032454; IPR032458	GO:0000786; GO:0003677; GO:0005634; GO:0046982
Others	5D_YR.wsnp_Ex_c65985_64188864	Breeding progress	TraesCS5D01G110800.1	Late embryogenesis abundant (LEA) hydroxyproline-rich glycoprotein family	PF03168: Late embryogenesis abundant protein	IPR004864: Late embryogenesis abundant protein, LEA-14	NA	IPR004864	NA
Signal transduction	5D_YR.wsnp_Ex_c65985_64188864	Breeding progress	TraesCS5D01G110900.1	Methylthioribulose-1-phosphate dehydratase	PF00596: Class II Aldolase and Adducin N-terminal domain; PF13419: Haloacid dehalogenase-like hydrolase	IPR001303: Class II aldolase/adducin N-terminal; IPR006439: HAD hydrolase, subfamily IA; IPR017714: Methylthioribulose-1-phosphate dehydratase; IPR023214: HAD-like domain; IPR023943: Enolase-phosphatase E1; IPR027505: Probable bifunctional methylthioribulose-1-phosphate dehydratase/enolase-phosphatase E1; IPR027514: Methylthioribulose-1-phosphate dehydratase, eukaryotes	GO:0000287 MF: magnesium ion binding;GO:0005737 CC: cytoplasm;GO:0008152 BP: metabolic process;GO:0016787 MF: hydrolase activity;GO:0019509 BP: L-methionine salvage from methylthioadenosine;GO:0043874 MF: acireductone synthase activity;GO:0046872 MF: metal ion binding	IPR001303; IPR006439; IPR017714; IPR023214; IPR023943; IPR027505; IPR027514	GO:0000287; GO:0005737; GO:0008152; GO:0016787; GO:0019509; GO:0043874; GO:0046872
Repair, protection and cell wall modification	5D_YR.wsnp_Ex_c65985_64188864	Breeding progress	TraesCS5D01G111000.2	Callose synthase-like protein	PF14288: 1,3-beta-glucan synthase subunit FKS1, domain-1; PF02364: 1,3-beta-glucan synthase component	IPR003440: Glycosyl transferase, family 48; IPR023175: Vacuolar protein sorting-associate protein Vta1/Callose synthase, N-terminal domain; IPR026899: 1,3-beta-glucan synthase subunit FKS1-like, domain-1	GO:0000148 CC: 1,3-beta-D-glucan synthase complex;GO:0003843 MF: 1,3-beta-D-glucan synthase activity;GO:0006075 BP: (1->3)-beta-D-glucan biosynthetic process;GO:0016020 CC: membrane	IPR003440; IPR023175; IPR026899	GO:0000148; GO:0003843; GO:0006075; GO:0016020
Others	5D_YR.wsnp_Ex_c65985_64188864	Breeding progress	TraesCS5D01G111200.1	Auxin-binding protein	PF02041: Auxin binding protein	IPR000526: Auxin-binding protein; IPR011051: RmlC-like cupin domain; IPR014710: RmlC-like jelly roll fold	GO:0004872 MF: receptor activity	IPR000526; IPR011051; IPR014710	GO:0004872
Others	5D_YR.wsnp_Ex_c65985_64188864	Breeding progress	TraesCS5D01G111300.1	NAC domain-containing protein	PF02365: No apical meristem (NAM) protein	IPR003441: NAC domain	GO:0003677 MF: DNA binding;GO:0006355 BP: regulation of transcription, DNA-templated	IPR003441	GO:0003677; GO:0006355
Others	5D_YR.wsnp_Ex_c65985_64188864	Breeding progress	TraesCS5D01G111400.1	Dipeptidyl peptidase	PF00930: Dipeptidyl peptidase IV (DPP IV) N-terminal region; PF00326: Prolyl oligopeptidase family	IPR001375: Peptidase S9, prolyl oligopeptidase, catalytic domain; IPR002469: Dipeptidylpeptidase IV, N-terminal domain; IPR029058: Alpha/Beta hydrolase fold	GO:0006508 BP: proteolysis;GO:0008236 MF: serine-type peptidase activity	IPR001375; IPR002469; IPR029058	GO:0006508; GO:0008236
Antiporter and transmembrane proteins	5D_YR.wsnp_Ex_c65985_64188864	Breeding progress	TraesCS5D01G111500.1	Glutathione synthetase	PF03917: Eukaryotic glutathione synthase, ATP binding domain; PF03199: Eukaryotic glutathione synthase	IPR004887: Glutathione synthase, substrate-binding, eukaryotic; IPR005615: Glutathione synthase; IPR014042: Glutathione synthase, alpha-helical, eukaryotic; IPR014049: Glutathione synthase, N-terminal, eukaryotic; IPR014709: Glutathione synthase domain; IPR016185: Pre-ATP-grasp domain	GO:0004363 MF: glutathione synthase activity;GO:0005524 MF: ATP binding;GO:0006750 BP: glutathione biosynthetic process;GO:0016874 MF: ligase activity	IPR004887; IPR005615; IPR014042; IPR014049; IPR014709; IPR016185	GO:0004363; GO:0005524; GO:0006750; GO:0016874
Repair, protection and cell wall modification	5D_YR.wsnp_Ex_c65985_64188864	Breeding progress	TraesCS5D01G111600.3	Ap-5 complex subunit mu	PF00928: Adaptor complexes medium subunit family	IPR018240: Clathrin adaptor, mu subunit, conserved site; IPR028565: Mu homology domain	GO:0006886 BP: intracellular protein transport;GO:0016192 BP: vesicle-mediated transport;GO:0030131 CC: clathrin adaptor complex	IPR018240; IPR028565	GO:0006886; GO:0016192; GO:0030131
Others	5D_YR.wsnp_Ex_c65985_64188864	Breeding progress	TraesCS5D01G112000.1	Pentatricopeptide repeat-containing protein	PF01535: PPR repeat; PF13041: PPR repeat family	IPR002885: Pentatricopeptide repeat; IPR011990: Tetratricopeptide-like helical domain	GO:0005515 MF: protein binding	IPR002885; IPR011990	GO:0005515
Redox homeostasis and detoxification	5D_YR.wsnp_Ex_c65985_64188864	Breeding progress	TraesCS5D01G112100.1	Histone-lysine N-methyltransferase	PF00628: PHD-finger	IPR001965: Zinc finger, PHD-type; IPR011011: Zinc finger, FYVE/PHD-type; IPR013083: Zinc finger, RING/FYVE/PHD-type; IPR019786: Zinc finger, PHD-type, conserved site; IPR019787: Zinc finger, PHD-finger	GO:0005515 MF: protein binding;GO:0008270 MF: zinc ion binding	IPR001965; IPR011011; IPR013083; IPR019786; IPR019787	GO:0005515; GO:0008270
Osmo-protectant synthesis related protein	5D_YR.wsnp_Ex_c65985_64188864	Breeding progress	TraesCS5D01G112300.1	30S ribosomal protein S15	PF00312: Ribosomal protein S15	IPR000589: Ribosomal protein S15; IPR005290: Ribosomal protein S15, bacterial-type; IPR009068: S15/NS1, RNA-binding	GO:0003735 MF: structural constituent of ribosome;GO:0005622 CC: intracellular;GO:0005840 CC: ribosome;GO:0006412 BP: translation	IPR000589; IPR005290; IPR009068	GO:0003735; GO:0005622; GO:0005840; GO:0006412
Others	5D_YR.wsnp_Ex_c65985_64188864	Breeding progress	TraesCS5D01G112500.1	Aquaporin	PF00230: Major intrinsic protein	IPR000425: Major intrinsic protein; IPR022357: Major intrinsic protein, conserved site; IPR023271: Aquaporin-like	GO:0005215 MF: transporter activity;GO:0006810 BP: transport;GO:0016020 CC: membrane	IPR000425; IPR022357; IPR023271	GO:0005215; GO:0006810; GO:0016020
Sugar metabolism	5D_YR.wsnp_Ex_c65985_64188864	Breeding progress	TraesCS5D01G112600.1	Phosphoglucosamine mutase family protein	PF02878: Phosphoglucomutase/phosphomannomutase, alpha/beta/alpha domain I; PF02879: Phosphoglucomutase/phosphomannomutase, alpha/beta/alpha domain II; PF02880: Phosphoglucomutase/phosphomannomutase, alpha/beta/alpha domain III	IPR005841: Alpha-D-phosphohexomutase superfamily; IPR005843: Alpha-D-phosphohexomutase, C-terminal; IPR005844: Alpha-D-phosphohexomutase, alpha/beta/alpha domain I; IPR005845: Alpha-D-phosphohexomutase, alpha/beta/alpha domain II; IPR005846: Alpha-D-phosphohexomutase, alpha/beta/alpha domain III; IPR016055: Alpha-D-phosphohexomutase, alpha/beta/alpha I/II/III	GO:0005975 BP: carbohydrate metabolic process;GO:0016868 MF: intramolecular transferase activity, phosphotransferases;GO:0071704 BP: organic substance metabolic process	IPR005841; IPR005843; IPR005844; IPR005845; IPR005846; IPR016055	GO:0005975; GO:0016868; GO:0071704
Redox homeostasis and detoxification	5D_YR.wsnp_Ex_c65985_64188864	Breeding progress	TraesCS5D01G112800.1	Guanylate kinase	PF00625: Guanylate kinase	IPR008144: Guanylate kinase-like domain; IPR008145: Guanylate kinase/L-type calcium channel beta subunit; IPR011043: Galactose oxidase/kelch, beta-propeller; IPR015915: Kelch-type beta propeller; IPR017665: Guanylate kinase; IPR027417: P-loop containing nucleoside triphosphate hydrolase	GO:0004385 MF: guanylate kinase activity;GO:0005515 MF: protein binding;GO:0006163 BP: purine nucleotide metabolic process	IPR008144; IPR008145; IPR011043; IPR015915; IPR017665; IPR027417	GO:0004385; GO:0005515; GO:0006163
Stress and defense related proteins/ Chaperone	5D_YR.wsnp_Ex_c65985_64188864	Breeding progress	TraesCS5D01G112900.1	Zinc finger CCCH domain-containing protein	PF12796: Ankyrin repeats (3 copies)	IPR000571: Zinc finger, CCCH-type; IPR002110: Ankyrin repeat; IPR020683: Ankyrin repeat-containing domain	GO:0005515 MF: protein binding;GO:0046872 MF: metal ion binding	IPR000571; IPR002110; IPR020683	GO:0005515; GO:0046872
Others	5D_YR.wsnp_Ex_c65985_64188864	Breeding progress	TraesCS5D01G113000.2	IAA-amino acid hydrolase ILR1	PF01546: Peptidase family M20/M25/M40; PF07687: Peptidase dimerisation domain	IPR002933: Peptidase M20; IPR011650: Peptidase M20, dimerisation domain; IPR017439: Amidohydrolase	GO:0008152 BP: metabolic process;GO:0016787 MF: hydrolase activity	IPR002933; IPR011650; IPR017439	GO:0008152; GO:0016787
Antiporter and transmembrane proteins	5D_YR.wsnp_Ex_c65985_64188864	Breeding progress	TraesCS5D01G113100.1	Dicarboxylate transporter 2.1, chloroplastic	PF00939: Sodium:sulfate symporter transmembrane region	IPR001898: Solute carrier family 13	GO:0005215 MF: transporter activity;GO:0006814 BP: sodium ion transport;GO:0016020 CC: membrane;GO:0055085 BP: transmembrane transport	IPR001898	GO:0005215; GO:0006814; GO:0016020; GO:0055085
Osmo-protectant synthesis related protein	5D_YR.wsnp_Ex_c65985_64188864	Breeding progress	TraesCS5D01G113200.1	Phenylalanine--tRNA ligase beta subunit	PF03483: B3/4 domain; PF03484: tRNA synthetase B5 domain; PF01409: tRNA synthetases class II core domain (F)	IPR002319: Phenylalanyl-tRNA synthetase; IPR004531: Phenylalanyl-tRNA synthetase, class IIc, beta subunit, archae/euk cytosolic; IPR005146: B3/B4 tRNA-binding domain; IPR005147: tRNA synthetase, B5-domain; IPR009061: Putative DNA-binding domain; IPR020825: Phenylalanyl-tRNA synthetase, B3/B4	GO:0000049 MF: tRNA binding;GO:0000166 MF: nucleotide binding;GO:0000287 MF: magnesium ion binding;GO:0003723 MF: RNA binding;GO:0004812 MF: aminoacyl-tRNA ligase activity;GO:0004826 MF: phenylalanine-tRNA ligase activity;GO:0005524 MF: ATP binding;GO:0005737 CC: cytoplasm;GO:0006432 BP: phenylalanyl-tRNA aminoacylation;GO:0043039 BP: tRNA aminoacylation	IPR002319; IPR004531; IPR005146; IPR005147; IPR009061; IPR020825	GO:0000049; GO:0000166; GO:0000287; GO:0003723; GO:0004812; GO:0004826; GO:0005524; GO:0005737; GO:0006432; GO:0043039
Transcription factors and translation	5D_YR.wsnp_Ex_c65985_64188864	Breeding progress	TraesCS5D01G113300.1	Myb transcription factor	PF00249: Myb-like DNA-binding domain	IPR001005: SANT/Myb domain; IPR009057: Homeobox domain-like; IPR017930: Myb domain	GO:0003677 MF: DNA binding	IPR001005; IPR009057; IPR017930	GO:0003677
Signal transduction	5D_YR.wsnp_Ex_c65985_64188864	Breeding progress	TraesCS5D01G113400.1	1-acyl-sn-glycerol-3-phosphate acyltransferase	PF01553: Acyltransferase; PF16076: Acyltransferase C-terminus	IPR002123: Phospholipid/glycerol acyltransferase; IPR032098: Acyltransferase, C-terminal domain	GO:0008152 BP: metabolic process;GO:0016746 MF: transferase activity, transferring acyl groups	IPR002123; IPR032098	GO:0008152; GO:0016746
Others	5D_YR.wsnp_Ex_c65985_64188864	Breeding progress	TraesCS5D01G113500.1	Mitochondrial import inner membrane translocase subunit TIM22	PF02466: Tim17/Tim22/Tim23/Pmp24 family	IPR003397: Mitochondrial inner membrane translocase subunit Tim17/Tim22/Tim23/peroxisomal protein PMP24	NA	IPR003397	NA
Others	5D_YR.wsnp_Ex_c65985_64188864	Breeding progress	TraesCS5D01G113600.1	Sterile alpha motif (SAM) domain-containing protein	PF00536: SAM domain (Sterile alpha motif)	IPR001660: Sterile alpha motif domain; IPR013761: Sterile alpha motif/pointed domain	GO:0005515 MF: protein binding	IPR001660; IPR013761	GO:0005515
Stress and defense related proteins/ Chaperone	5D_YR.wsnp_Ex_c65985_64188864	Breeding progress	TraesCS5D01G113700.1	Chaperone protein htpG family protein	PF02518: Histidine kinase-, DNA gyrase B-, and HSP90-like ATPase; PF00183: Hsp90 protein	IPR001404: Heat shock protein Hsp90 family; IPR003594: Histidine kinase-like ATPase, C-terminal domain; IPR019805: Heat shock protein Hsp90, conserved site; IPR020568: Ribosomal protein S5 domain 2-type fold; IPR020575: Heat shock protein Hsp90, N-terminal	GO:0005524 MF: ATP binding;GO:0006457 BP: protein folding;GO:0006950 BP: response to stress;GO:0051082 MF: unfolded protein binding	IPR001404; IPR003594; IPR019805; IPR020568; IPR020575	GO:0005524; GO:0006457; GO:0006950; GO:0051082
Repair, protection and cell wall modification	5D_YR.wsnp_Ex_c65985_64188864	Breeding progress	TraesCS5D01G113800.2	Regulation of nuclear pre-mRNA domain-containing protein 1B	PF04818: RNA polymerase II-binding domain.	IPR006569: CID domain; IPR006903: RNA polymerase II-binding domain; IPR008942: ENTH/VHS	NA	IPR006569; IPR006903; IPR008942	NA
Antiporter and transmembrane proteins	5D_YR.wsnp_Ex_c65985_64188864	Breeding progress	TraesCS5D01G113900.1	Protein OBERON 2-like protein	PF07227: PHD - plant homeodomain finger protein; PF16312: Coiled-coil region of Oberon	IPR001965: Zinc finger, PHD-type; IPR004082: Protein OBERON; IPR032535: Oberon, coiled-coil region; IPR032881: Oberon, PHD finger domain	GO:0005515 MF: protein binding;GO:0008270 MF: zinc ion binding	IPR001965; IPR004082; IPR032535; IPR032881	GO:0005515; GO:0008270
Others	5D_YR.wsnp_Ex_c65985_64188864	Breeding progress	TraesCS5D01G114000.1	CASP-like protein	PF04535: Domain of unknown function (DUF588)	IPR006459: Casparian strip membrane protein; IPR006702: Domain of unknown function DUF588	NA	IPR006459; IPR006702	NA
Sugar metabolism	5D_YR.wsnp_Ex_c65985_64188864	Breeding progress	TraesCS5D01G114100.1	UDP-glycosyltransferase	PF00201: UDP-glucoronosyl and UDP-glucosyl transferase	IPR002213: UDP-glucuronosyl/UDP-glucosyltransferase	GO:0008152 BP: metabolic process;GO:0016758 MF: transferase activity, transferring hexosyl groups	IPR002213	GO:0008152; GO:0016758
Antiporter and transmembrane proteins	5D_YR.wsnp_Ex_c65985_64188864	Breeding progress	TraesCS5D01G114300.2	Polyol transporter	PF00083: Sugar (and other) transporter	IPR003663: Sugar/inositol transporter; IPR005828: Major facilitator, sugar transporter-like; IPR005829: Sugar transporter, conserved site; IPR020846: Major facilitator superfamily domain	GO:0005215 MF: transporter activity;GO:0016020 CC: membrane;GO:0016021 CC: integral component of membrane;GO:0022857 MF: transmembrane transporter activity;GO:0022891 MF: substrate-specific transmembrane transporter activity;GO:0055085 BP: transmembrane transport	IPR003663; IPR005828; IPR005829; IPR020846	GO:0005215; GO:0016020; GO:0016021; GO:0022857; GO:0022891; GO:0055085
Antiporter and transmembrane proteins	5D_YR.wsnp_Ex_c65985_64188864	Breeding progress	TraesCS5D01G114400.1	Polyol transporter	PF00083: Sugar (and other) transporter	IPR003663: Sugar/inositol transporter; IPR005828: Major facilitator, sugar transporter-like; IPR005829: Sugar transporter, conserved site; IPR020846: Major facilitator superfamily domain	GO:0005215 MF: transporter activity;GO:0016020 CC: membrane;GO:0016021 CC: integral component of membrane;GO:0022857 MF: transmembrane transporter activity;GO:0022891 MF: substrate-specific transmembrane transporter activity;GO:0055085 BP: transmembrane transport	IPR003663; IPR005828; IPR005829; IPR020846	GO:0005215; GO:0016020; GO:0016021; GO:0022857; GO:0022891; GO:0055085
Redox homeostasis and detoxification	5D_YR.wsnp_Ex_c65985_64188864	Breeding progress	TraesCS5D01G114500.1	Flavin-containing monooxygenase	PF00743: Flavin-binding monooxygenase-like	IPR020946: Flavin monooxygenase-like; IPR023753: FAD/NAD(P)-binding domain	GO:0004499 MF: N,N-dimethylaniline monooxygenase activity;GO:0016491 MF: oxidoreductase activity;GO:0050660 MF: flavin adenine dinucleotide binding;GO:0050661 MF: NADP binding;GO:0055114 BP: oxidation-reduction process	IPR020946; IPR023753	GO:0004499; GO:0016491; GO:0050660; GO:0050661; GO:0055114
Stress and defense related proteins/ Chaperone	5D_YR.wsnp_Ex_c65985_64188864	Breeding progress	TraesCS5D01G114600.1	Crt	PF08627: CRT-like, chloroquine-resistance transporter-like	IPR013936: Chloroquine-resistance transporter-like	NA	IPR013936	NA
Antiporter and transmembrane proteins	5D_YR.wsnp_Ex_c65985_64188864	Breeding progress	TraesCS5D01G114700.1	Heptahelical transmembrane protein 4	PF03006: Haemolysin-III related	IPR004254: AdipoR/Haemolysin-III-related	GO:0016021 CC: integral component of membrane	IPR004254	GO:0016021
Transcription factors and translation	5D_YR.wsnp_Ex_c65985_64188864	Breeding progress	TraesCS5D01G114800.1	Myb/SANT-like DNA-binding domain protein	PF12776: Myb/SANT-like DNA-binding domain	IPR024752: Myb/SANT-like domain	NA	IPR024752	NA
Antiporter and transmembrane proteins	5D_YR.wsnp_Ex_c65985_64188864	Breeding progress	TraesCS5D01G115000.1	LIM domain protein	PF00412: LIM domain	IPR001781: Zinc finger, LIM-type	GO:0008270 MF: zinc ion binding	IPR001781	GO:0008270
Sugar metabolism	5D_YR.wsnp_Ex_c65985_64188864	Breeding progress	TraesCS5D01G115200.1	Starch synthase IIIa	PF15811: Small VCP/p97-interacting protein	IPR031632: Small VCP/p97-interacting protein	NA	IPR031632	NA
Osmo-protectant synthesis related protein	5D_YR.wsnp_Ex_c65985_64188864	Breeding progress	TraesCS5D01G115300.1	30S ribosomal protein S14 type Z	PF00253: Ribosomal protein S14p/S29e	IPR001209: Ribosomal protein S14	GO:0003735 MF: structural constituent of ribosome;GO:0005622 CC: intracellular;GO:0005840 CC: ribosome;GO:0006412 BP: translation	IPR001209	GO:0003735; GO:0005622; GO:0005840; GO:0006412
Antiporter and transmembrane proteins	5D_YR.wsnp_Ex_c65985_64188864	Breeding progress	TraesCS5D01G115400.2	Ubiquitinyl hydrolase 1	PF02148: Zn-finger in ubiquitin-hydrolases and other protein	IPR001607: Zinc finger, UBP-type; IPR013083: Zinc finger, RING/FYVE/PHD-type	GO:0008270 MF: zinc ion binding	IPR001607; IPR013083	GO:0008270
Others	5D_YR.wsnp_Ex_c65985_64188864	Breeding progress	TraesCS5D01G115600.1	Peroxisomal membrane 22 kDa (Mpv17/PMP22) family protein	PF04117: Mpv17 / PMP22 family	IPR007248: Mpv17/PMP22	GO:0016021 CC: integral component of membrane	IPR007248	GO:0016021
Stress and defense related proteins/ Chaperone	5D_YR.wsnp_Ex_c65985_64188864	Breeding progress	TraesCS5D01G115700.1	GTPase Obg	PF03242: Late embryogenesis abundant protein	IPR004926: Late embryogenesis abundant protein, LEA5-type	GO:0006950 BP: response to stress	IPR004926	GO:0006950
Others	5D_YR.wsnp_Ex_c65985_64188864	Breeding progress	TraesCS5D01G115900.1	Upstream activation factor subunit spp27	PF02201: SWIB/MDM2 domain	IPR003121: SWIB/MDM2 domain; IPR019835: SWIB domain	GO:0005515 MF: protein binding	IPR003121; IPR019835	GO:0005515
Transcription factors and translation	5D_YR.wsnp_Ex_c65985_64188864	Breeding progress	TraesCS5D01G116100.1	WRKY transcription factor	PF03106: WRKY DNA -binding domain	IPR003657: WRKY domain	GO:0003700 MF: transcription factor activity, sequence-specific DNA binding;GO:0006355 BP: regulation of transcription, DNA-templated;GO:0043565 MF: sequence-specific DNA binding	IPR003657	GO:0003700; GO:0006355; GO:0043565
Redox homeostasis and detoxification	5D_YR.wsnp_Ex_c65985_64188864	Breeding progress	TraesCS5D01G116200.2	Eukaryotic translation initiation factor 5A	PF01287: Eukaryotic elongation factor 5A hypusine, DNA-binding OB fold	IPR001884: Translation elongation factor IF5A; IPR008991: Translation protein SH3-like domain; IPR012340: Nucleic acid-binding, OB-fold; IPR014722: Ribosomal protein L2 domain 2; IPR019769: Translation elongation factor, IF5A, hypusine site; IPR020189: Translation elongation factor, IF5A C-terminal	GO:0003723 MF: RNA binding;GO:0003746 MF: translation elongation factor activity;GO:0006452 BP: translational frameshifting;GO:0043022 MF: ribosome binding;GO:0045901 BP: positive regulation of translational elongation;GO:0045905 BP: positive regulation of translational termination	IPR001884; IPR008991; IPR012340; IPR014722; IPR019769; IPR020189	GO:0003723; GO:0003746; GO:0006452; GO:0043022; GO:0045901; GO:0045905
Signal transduction	5D_YR.wsnp_Ex_c65985_64188864	Breeding progress	TraesCS5D01G116300.1	Plant calmodulin-binding protein-like protein	PF07839: Plant calmodulin-binding domain	IPR012417: Calmodulin-binding domain, plant	GO:0005516 MF: calmodulin binding	IPR012417	GO:0005516
Others	5D_YR.wsnp_Ex_c65985_64188864	Breeding progress	TraesCS5D01G116400.1	Cornichon protein, expressed	PF03311: Cornichon protein	IPR003377: Cornichon	GO:0006810 BP: transport;GO:0016021 CC: integral component of membrane	IPR003377	GO:0006810; GO:0016021
Others	5D_YR.wsnp_Ex_c65985_64188864	Breeding progress	TraesCS5D01G116600.1	Ureide permease-like protein	PF07168: Ureide permease	IPR009834: Ureide permease	GO:0071705 BP: nitrogen compound transport	IPR009834	GO:0071705
Stress and defense related proteins/ Chaperone	5D_YR.wsnp_Ex_c65985_64188864	Breeding progress	TraesCS5D01G116700.1	Chaperone protein DnaJ	PF00226: DnaJ domain; PF12171: Zinc-finger double-stranded RNA-binding	IPR001623: DnaJ domain; IPR003604: Matrin/U1-C-like, C2H2-type zinc finger; IPR013087: Zinc finger C2H2-type; IPR018253: DnaJ domain, conserved site; IPR022755: Zinc finger, double-stranded RNA binding	GO:0003676 MF: nucleic acid binding;GO:0008270 MF: zinc ion binding	IPR001623; IPR003604; IPR013087; IPR018253; IPR022755	GO:0003676; GO:0008270
Transcription factors and translation	5D_YR.wsnp_Ex_c65985_64188864	Breeding progress	TraesCS5D01G116800.1	GRF1-interacting factor-like protein	PF05030: SSXT protein (N-terminal region)	IPR007726: SS18 family	GO:0003713 MF: transcription coactivator activity	IPR007726	GO:0003713
Others	5D_YR.wsnp_Ex_c65985_64188864	Breeding progress	TraesCS5D01G117000.1	Cell division topological specificity factor-like protein	PF03776: Septum formation topological specificity factor MinE	IPR005527: Cell division topological specificity factor MinE	GO:0032955 BP: regulation of barrier septum assembly;GO:0051301 BP: cell division	IPR005527	GO:0032955; GO:0051301
Stress and defense related proteins/ Chaperone	5D_YR.wsnp_Ex_c65985_64188864	Breeding progress	TraesCS5D01G117100.1	Chaperone protein DnaJ	PF00226: DnaJ domain	IPR001623: DnaJ domain	NA	IPR001623	NA
Repair, protection and cell wall modification	5D_YR.wsnp_Ex_c65985_64188864	Breeding progress	TraesCS5D01G117200.1	Exocyst complex component Sec10-related family protein	PF07393: Exocyst complex component Sec10	IPR009976: Exocyst complex component Sec10-like	GO:0005737 CC: cytoplasm;GO:0006887 BP: exocytosis;GO:0048278 BP: vesicle docking	IPR009976	GO:0005737; GO:0006887; GO:0048278
Antiporter and transmembrane proteins	5D_YR.wsnp_Ex_c65985_64188864	Breeding progress	TraesCS5D01G117500.1	Transmembrane 19	PF01940: Integral membrane protein DUF92	IPR002794: Protein of unknown function DUF92, TMEM19	GO:0016021 CC: integral component of membrane	IPR002794	GO:0016021
Stress and defense related proteins/ Chaperone	5D_YR.wsnp_Ex_c65985_64188864	Breeding progress	TraesCS5D01G117600.1	Chaperone DnaK	PF00012: Hsp70 protein	IPR012725: Chaperone DnaK; IPR013126: Heat shock protein 70 family; IPR018181: Heat shock protein 70, conserved site; IPR029047: Heat shock protein 70kD, peptide-binding domain; IPR029048: Heat shock protein 70kD, C-terminal domain	GO:0005524 MF: ATP binding;GO:0006457 BP: protein folding;GO:0051082 MF: unfolded protein binding	IPR012725; IPR013126; IPR018181; IPR029047; IPR029048	GO:0005524; GO:0006457; GO:0051082
Regulation of transcription	5D_YR.wsnp_Ex_c65985_64188864	Breeding progress	TraesCS5D01G117700.1	mediator of RNA polymerase II transcription subunit-like protein	PF15249: Conserved region of unknown function on GLTSCR protein	IPR015671: GLTSCR protein, conserved region	NA	IPR015671	NA
Others	5D_YR.wsnp_Ex_c65985_64188864	Breeding progress	TraesCS5D01G117800.1	Defective in cullin neddylation protein	PF14555: UBA-like domain; PF03556: Cullin binding	IPR005176: Potentiating neddylation domain; IPR009060: UBA-like	GO:0005515 MF: protein binding	IPR005176; IPR009060	GO:0005515
Antiporter and transmembrane proteins	5D_YR.wsnp_Ex_c65985_64188864	Breeding progress	TraesCS5D01G118000.1	E3 ubiquitin-protein ligase	PF06012: Domain of Unknown Function (DUF908); PF06025: Domain of Unknown Function (DUF913); PF00627: UBA/TS-N domain; PF14377: Domain of unknown function (DUF4414); PF00632: HECT-domain (ubiquitin-transferase)	IPR000569: HECT domain; IPR009060: UBA-like; IPR010309: E3 ubiquitin ligase, domain of unknown function DUF908; IPR010314: E3 ubiquitin ligase, domain of unknown function DUF913; IPR011989: Armadillo-like helical; IPR015940: Ubiquitin-associated domain; IPR016024: Armadillo-type fold; IPR025527: Domain of unknown function DUF4414	GO:0004842 MF: ubiquitin-protein transferase activity;GO:0005488 MF: binding;GO:0005515 MF: protein binding	IPR000569; IPR009060; IPR010309; IPR010314; IPR011989; IPR015940; IPR016024; IPR025527	GO:0004842; GO:0005488; GO:0005515
Transcription factors and translation	5D_YR.wsnp_Ex_c65985_64188864	Breeding progress	TraesCS5D01G118200.1	AGAMOUS MADS box factor transcription factor	PF00319: SRF-type transcription factor (DNA-binding and dimerisation domain); PF01486: K-box region	IPR002100: Transcription factor, MADS-box; IPR002487: Transcription factor, K-box	GO:0003677 MF: DNA binding;GO:0003700 MF: transcription factor activity, sequence-specific DNA binding;GO:0005634 CC: nucleus;GO:0006355 BP: regulation of transcription, DNA-templated;GO:0046983 MF: protein dimerization activity	IPR002100; IPR002487	GO:0003677; GO:0003700; GO:0005634; GO:0006355; GO:0046983
Signal transduction	5D_YR.wsnp_Ex_c65985_64188864	Breeding progress	TraesCS5D01G118300.1	Protein kinase family protein	PF00069: Protein kinase domain	IPR000719: Protein kinase domain; IPR008271: Serine/threonine-protein kinase, active site; IPR011009: Protein kinase-like domain; IPR017441: Protein kinase, ATP binding site	GO:0004672 MF: protein kinase activity;GO:0005524 MF: ATP binding;GO:0006468 BP: protein phosphorylation	IPR000719; IPR008271; IPR011009; IPR017441	GO:0004672; GO:0005524; GO:0006468
Others	5D_YR.wsnp_Ex_c65985_64188864	Breeding progress	TraesCS5D01G118400.1	Pentatricopeptide repeat-containing protein	PF13041: PPR repeat family; PF01535: PPR repeat	IPR002885: Pentatricopeptide repeat; IPR011990: Tetratricopeptide-like helical domain	GO:0005515 MF: protein binding	IPR002885; IPR011990	GO:0005515
Redox homeostasis and detoxification	5D_YR.wsnp_Ex_c65985_64188864	Breeding progress	TraesCS5D01G118500.1	Thioredoxin	PF00085: Thioredoxin	IPR005746: Thioredoxin; IPR012336: Thioredoxin-like fold; IPR013766: Thioredoxin domain; IPR017937: Thioredoxin, conserved site	GO:0006662 BP: glycerol ether metabolic process;GO:0015035 MF: protein disulfide oxidoreductase activity;GO:0045454 BP: cell redox homeostasis	IPR005746; IPR012336; IPR013766; IPR017937	GO:0006662; GO:0015035; GO:0045454
Others	5D_YR.wsnp_Ex_c65985_64188864	Breeding progress	TraesCS5D01G118700.1	ATP-dependent Clp protease ATP-binding subunit	PF02861: Clp amino terminal domain, pathogenicity island component; PF00004: ATPase family associated with various cellular activities (AAA); PF02151: UvrB/uvrC motif; PF07724: AAA domain (Cdc48 subfamily); PF10431: C-terminal, D2-small domain, of ClpB protein	IPR001270: ClpA/B family; IPR001943: UVR domain; IPR003593: AAA+ ATPase domain; IPR003959: ATPase, AAA-type, core; IPR004176: Clp, N-terminal; IPR018368: ClpA/B, conserved site 1; IPR019489: Clp ATPase, C-terminal; IPR027417: P-loop containing nucleoside triphosphate hydrolase; IPR028299: ClpA/B, conserved site 2	GO:0005515 MF: protein binding;GO:0005524 MF: ATP binding;GO:0019538 BP: protein metabolic process	IPR001270; IPR001943; IPR003593; IPR003959; IPR004176; IPR018368; IPR019489; IPR027417; IPR028299	GO:0005515; GO:0005524; GO:0019538
Signal transduction	5D_YR.wsnp_Ex_c65985_64188864	Breeding progress	TraesCS5D01G118800.1	Adenylate kinase	PF00406: Adenylate kinase; PF05191: Adenylate kinase, active site lid	IPR000850: Adenylate kinase/UMP-CMP kinase; IPR006259: Adenylate kinase subfamily; IPR007862: Adenylate kinase, active site lid domain; IPR027417: P-loop containing nucleoside triphosphate hydrolase; IPR033690: Adenylate kinase, conserved site	GO:0004017 MF: adenylate kinase activity;GO:0005524 MF: ATP binding;GO:0006139 BP: nucleobase-containing compound metabolic process;GO:0016776 MF: phosphotransferase activity, phosphate group as acceptor;GO:0019205 MF: nucleobase-containing compound kinase activity	IPR000850; IPR006259; IPR007862; IPR027417; IPR033690	GO:0004017; GO:0005524; GO:0006139; GO:0016776; GO:0019205
Signal transduction	5D_YR.wsnp_Ex_c65985_64188864	Breeding progress	TraesCS5D01G118900.1	P-loop containing nucleoside triphosphate hydrolases superfamily protein	PF00004: ATPase family associated with various cellular activities (AAA)	IPR003593: AAA+ ATPase domain; IPR003959: ATPase, AAA-type, core; IPR027417: P-loop containing nucleoside triphosphate hydrolase	GO:0005524 MF: ATP binding	IPR003593; IPR003959; IPR027417	GO:0005524
Signal transduction	5D_YR.wsnp_Ex_c65985_64188864	Breeding progress	TraesCS5D01G119100.2	protein kinase family protein	PF00069: Protein kinase domain; PF13499: EF-hand domain pair; PF13202: EF hand	IPR000719: Protein kinase domain; IPR002048: EF-hand domain; IPR008271: Serine/threonine-protein kinase, active site; IPR011009: Protein kinase-like domain; IPR011992: EF-hand domain pair; IPR017441: Protein kinase, ATP binding site; IPR018247: EF-Hand 1, calcium-binding site	GO:0004672 MF: protein kinase activity;GO:0005509 MF: calcium ion binding;GO:0005524 MF: ATP binding;GO:0006468 BP: protein phosphorylation	IPR000719; IPR002048; IPR008271; IPR011009; IPR011992; IPR017441; IPR018247	GO:0004672; GO:0005509; GO:0005524; GO:0006468
Stress and defense related proteins/ Chaperone	5D_YR.wsnp_Ex_c65985_64188864	Breeding progress	TraesCS5D01G119200.1	Zinc finger CCCH domain protein	PF00642: Zinc finger C-x8-C-x5-C-x3-H type (and similar)	IPR000571: Zinc finger, CCCH-type	GO:0046872 MF: metal ion binding	IPR000571	GO:0046872
Osmo-protectant synthesis related protein	5D_YR.wsnp_Ex_c65985_64188864	Breeding progress	TraesCS5D01G119400.1	SGF29 tudor-like domain-containing protein	PF07039: SGF29 tudor-like domain	IPR010750: SGF29 tudor-like domain; IPR019499: Valyl-tRNA synthetase, tRNA-binding arm	GO:0000166 MF: nucleotide binding;GO:0004832 MF: valine-tRNA ligase activity;GO:0005524 MF: ATP binding;GO:0005737 CC: cytoplasm;GO:0006438 BP: valyl-tRNA aminoacylation	IPR010750; IPR019499	GO:0000166; GO:0004832; GO:0005524; GO:0005737; GO:0006438
Others	5D_YR.wsnp_Ex_c65985_64188864	Breeding progress	TraesCS5D01G119700.1	AP-2 complex subunit sigma	PF01217: Clathrin adaptor complex small chain	IPR011012: Longin-like domain; IPR016635: Adaptor protein complex, sigma subunit; IPR022775: AP complex, mu/sigma subunit	GO:0006810 BP: transport;GO:0008565 MF: protein transporter activity;GO:0015031 BP: protein transport	IPR011012; IPR016635; IPR022775	GO:0006810; GO:0008565; GO:0015031
Others	5D_YR.wsnp_Ex_c65985_64188864	Breeding progress	TraesCS5D01G119800.1	Meiosis arrest female protein 1-like protein	PF01936: NYN domain; PF12872: OST-HTH/LOTUS domain	IPR021139: NYN domain, limkain-b1-type; IPR025605: OST-HTH/LOTUS domain; IPR029060: PIN domain-like	NA	IPR021139; IPR025605; IPR029060	NA
Others	5D_YR.wsnp_Ex_c65985_64188864	Breeding progress	TraesCS5D01G119900.1	Photosystem II reaction center protein K	PF02533: Photosystem II 4 kDa reaction centre component	IPR003687: Photosystem II PsbK	GO:0009523 CC: photosystem II;GO:0009539 CC: photosystem II reaction center;GO:0015979 BP: photosynthesis	IPR003687	GO:0009523; GO:0009539; GO:0015979
Others	5D_YR.wsnp_Ex_c65985_64188864	Breeding progress	TraesCS5D01G120000.1	Photosystem II reaction center protein I	PF02532: Photosystem II reaction centre I protein (PSII 4.8 kDa protein)	IPR003686: Photosystem II PsbI	GO:0009523 CC: photosystem II;GO:0009539 CC: photosystem II reaction center;GO:0015979 BP: photosynthesis;GO:0016020 CC: membrane	IPR003686	GO:0009523; GO:0009539; GO:0015979; GO:0016020
Others	5D_YR.wsnp_Ex_c65985_64188864	Breeding progress	TraesCS5D01G120100.1	Oxysterol-binding protein, putative	PF15413: Pleckstrin homology domain; PF01237: Oxysterol-binding protein	IPR000648: Oxysterol-binding protein; IPR001849: Pleckstrin homology domain; IPR011993: PH domain-like	NA	IPR000648; IPR001849; IPR011993	NA
Osmo-protectant synthesis related protein	5D_YR.wsnp_Ex_c65985_64188864	Breeding progress	TraesCS5D01G120200.1	tRNA modification GTPase MnmE	PF04548: AIG1 family; PF11886: Translocase of chloroplast 159/132, membrane anchor domain	IPR006703: AIG1-type guanine nucleotide-binding (G) domain; IPR024283: Translocase of chloroplast 159/132, membrane anchor domain; IPR027417: P-loop containing nucleoside triphosphate hydrolase	GO:0005525 MF: GTP binding	IPR006703; IPR024283; IPR027417	GO:0005525
Antiporter and transmembrane proteins	5D_YR.wsnp_Ex_c65985_64188864	Breeding progress	TraesCS5D01G120300.1	Protein transport protein Sec24-like	PF04810: Sec23/Sec24 zinc finger; PF04811: Sec23/Sec24 trunk domain; PF08033: Sec23/Sec24 beta-sandwich domain; PF04815: Sec23/Sec24 helical domain	IPR002035: von Willebrand factor, type A; IPR006895: Zinc finger, Sec23/Sec24-type; IPR006896: Sec23/Sec24, trunk domain; IPR006900: Sec23/Sec24, helical domain; IPR007123: Gelsolin-like domain; IPR012990: Sec23/Sec24 beta-sandwich; IPR029006: ADF-H/Gelsolin-like domain	GO:0006886 BP: intracellular protein transport;GO:0006888 BP: ER to Golgi vesicle-mediated transport;GO:0008270 MF: zinc ion binding;GO:0030127 CC: COPII vesicle coat	IPR002035; IPR006895; IPR006896; IPR006900; IPR007123; IPR012990; IPR029006	GO:0006886; GO:0006888; GO:0008270; GO:0030127
Signal transduction	5D_YR.wsnp_Ex_c65985_64188864	Breeding progress	TraesCS5D01G120500.1	Diacylglycerol kinase	PF00130: Phorbol esters/diacylglycerol binding domain (C1 domain); PF00781: Diacylglycerol kinase catalytic domain; PF00609: Diacylglycerol kinase accessory domain	IPR000756: Diacylglycerol kinase, accessory domain; IPR001206: Diacylglycerol kinase, catalytic domain; IPR002219: Protein kinase C-like, phorbol ester/diacylglycerol-binding domain; IPR016064: NAD kinase/diacylglycerol kinase-like domain; IPR017438: Inorganic polyphosphate/ATP-NAD kinase, domain 1	GO:0003951 MF: NAD+ kinase activity;GO:0004143 MF: diacylglycerol kinase activity;GO:0007205 BP: protein kinase C-activating G-protein coupled receptor signaling pathway;GO:0008152 BP: metabolic process;GO:0016301 MF: kinase activity;GO:0035556 BP: intracellular signal transduction	IPR000756; IPR001206; IPR002219; IPR016064; IPR017438	GO:0003951; GO:0004143; GO:0007205; GO:0008152; GO:0016301; GO:0035556
Stress and defense related proteins/ Chaperone	5D_YR.wsnp_Ex_c65985_64188864	Breeding progress	TraesCS5D01G120800.1	Adenine nucleotide alpha hydrolases-like superfamily protein, putative	PF00582: Universal stress protein family	IPR006016: UspA; IPR014729: Rossmann-like alpha/beta/alpha sandwich fold	GO:0006950 BP: response to stress	IPR006016; IPR014729	GO:0006950
Others	5D_YR.wsnp_Ex_c65985_64188864	Breeding progress	TraesCS5D01G121100.2	Cyclin family protein	PF00134: Cyclin, N-terminal domain; PF02984: Cyclin, C-terminal domain	IPR004367: Cyclin, C-terminal domain; IPR006671: Cyclin, N-terminal; IPR013763: Cyclin-like	GO:0005634 CC: nucleus	IPR004367; IPR006671; IPR013763	GO:0005634
Others	5D_YR.wsnp_Ex_c65985_64188864	Breeding progress	TraesCS5D01G121200.1	Nitrilase/cyanide hydratase and apolipoprotein N-acyltransferase family protein	PF00795: Carbon-nitrogen hydrolase	IPR003010: Carbon-nitrogen hydrolase	GO:0006807 BP: nitrogen compound metabolic process;GO:0016810 MF: hydrolase activity, acting on carbon-nitrogen (but not peptide) bonds	IPR003010	GO:0006807; GO:0016810
Others	5D_YR.wsnp_Ex_c65985_64188864	Breeding progress	TraesCS5D01G121300.1	Proteasome subunit alpha type	PF00227: Proteasome subunit	IPR001353: Proteasome, subunit alpha/beta; IPR023332: Proteasome alpha-type subunit; IPR029055: Nucleophile aminohydrolases, N-terminal	GO:0004298 MF: threonine-type endopeptidase activity;GO:0005839 CC: proteasome core complex;GO:0051603 BP: proteolysis involved in cellular protein catabolic process	IPR001353; IPR023332; IPR029055	GO:0004298; GO:0005839; GO:0051603
Signal transduction	5D_YR.wsnp_Ex_c65985_64188864	Breeding progress	TraesCS5D01G121400.1	Methylthioribose-1-phosphate isomerase	PF01008: Initiation factor 2 subunit family	IPR000649: Initiation factor 2B-related; IPR027363: Methylthioribose-1-phosphate isomerase-like, N-terminal domain	GO:0044237 BP: cellular metabolic process	IPR000649; IPR027363	GO:0044237
Others	5D_YR.wsnp_Ex_c65985_64188864	Breeding progress	TraesCS5D01G121500.1	Pumilio	PF00806: Pumilio-family RNA binding repeat	IPR001313: Pumilio RNA-binding repeat; IPR011989: Armadillo-like helical; IPR016024: Armadillo-type fold; IPR033133: Pumilio homology domain	GO:0003723 MF: RNA binding;GO:0005488 MF: binding	IPR001313; IPR011989; IPR016024; IPR033133	GO:0003723; GO:0005488
Osmo-protectant synthesis related protein	5D_YR.wsnp_Ex_c65985_64188864	Breeding progress	TraesCS5D01G121600.1	30S ribosomal protein S4	PF00163: Ribosomal protein S4/S9 N-terminal domain; PF01479: S4 domain	IPR001912: Ribosomal protein S4/S9, N-terminal; IPR002942: RNA-binding S4 domain; IPR005710: Ribosomal protein S4/S9, eukaryotic/archaeal; IPR018079: Ribosomal protein S4, conserved site	GO:0003723 MF: RNA binding;GO:0003735 MF: structural constituent of ribosome;GO:0005622 CC: intracellular;GO:0006412 BP: translation;GO:0015935 CC: small ribosomal subunit;GO:0019843 MF: rRNA binding	IPR001912; IPR002942; IPR005710; IPR018079	GO:0003723; GO:0003735; GO:0005622; GO:0006412; GO:0015935; GO:0019843
Signal transduction	5D_YR.wsnp_Ex_c65985_64188864	Breeding progress	TraesCS5D01G121900.1	Cyclin family protein	PF00134: Cyclin, N-terminal domain	IPR006671: Cyclin, N-terminal; IPR013763: Cyclin-like; IPR015429: Cyclin L/T	GO:0000079 BP: regulation of cyclin-dependent protein serine/threonine kinase activity;GO:0006355 BP: regulation of transcription, DNA-templated;GO:0019901 MF: protein kinase binding	IPR006671; IPR013763; IPR015429	GO:0000079; GO:0006355; GO:0019901
Antiporter and transmembrane proteins	5D_YR.wsnp_Ex_c65985_64188864	Breeding progress	TraesCS5D01G122000.1	E3 ubiquitin-protein ligase RGLG2	PF07002: Copine; PF13920: Zinc finger, C3HC4 type (RING finger)	IPR001841: Zinc finger, RING-type; IPR002035: von Willebrand factor, type A; IPR010734: Copine; IPR013083: Zinc finger, RING/FYVE/PHD-type	GO:0005515 MF: protein binding;GO:0008270 MF: zinc ion binding	IPR001841; IPR002035; IPR010734; IPR013083	GO:0005515; GO:0008270
Others	5D_YR.wsnp_Ex_c65985_64188864	Breeding progress	TraesCS5D01G122300.1	Aminopeptidase	PF12576: Protein of unknown function (DUF3754)	IPR022227: Protein of unknown function DUF3754	NA	IPR022227	NA
Signal transduction	5D_YR.wsnp_Ex_c65985_64188864	Breeding progress	TraesCS5D01G122400.1	Protein kinase, putative, expressed	PF00069: Protein kinase domain	IPR000719: Protein kinase domain; IPR008271: Serine/threonine-protein kinase, active site; IPR011009: Protein kinase-like domain	GO:0004672 MF: protein kinase activity;GO:0005524 MF: ATP binding;GO:0006468 BP: protein phosphorylation	IPR000719; IPR008271; IPR011009	GO:0004672; GO:0005524; GO:0006468
Sugar metabolism	5D_YR.wsnp_Ex_c65985_64188864	Breeding progress	TraesCS5D01G122700.1	Fructose-bisphosphate aldolase	PF00274: Fructose-bisphosphate aldolase class-I	IPR000741: Fructose-bisphosphate aldolase, class-I; IPR013785: Aldolase-type TIM barrel; IPR029768: Fructose-bisphosphate aldolase class-I active site	GO:0003824 MF: catalytic activity;GO:0004332 MF: fructose-bisphosphate aldolase activity;GO:0006096 BP: glycolytic process	IPR000741; IPR013785; IPR029768	GO:0003824; GO:0004332; GO:0006096
Signal transduction	5D_YR.wsnp_Ex_c65985_64188864	Breeding progress	TraesCS5D01G122800.1	Calcium-dependent protein kinase	PF00069: Protein kinase domain; PF13499: EF-hand domain pair	IPR000719: Protein kinase domain; IPR002048: EF-hand domain; IPR008271: Serine/threonine-protein kinase, active site; IPR011009: Protein kinase-like domain; IPR011992: EF-hand domain pair; IPR017441: Protein kinase, ATP binding site; IPR018247: EF-Hand 1, calcium-binding site	GO:0004672 MF: protein kinase activity;GO:0005509 MF: calcium ion binding;GO:0005524 MF: ATP binding;GO:0006468 BP: protein phosphorylation	IPR000719; IPR002048; IPR008271; IPR011009; IPR011992; IPR017441; IPR018247	GO:0004672; GO:0005509; GO:0005524; GO:0006468
chlorophyll metabolism	5D_YR.wsnp_Ex_c65985_64188864	Breeding progress	TraesCS5D01G123000.1	Protein reticulata-related 1, chloroplastic	PF11891: Protein RETICULATA-related	IPR021825: Protein RETICULATA-related	NA	IPR021825	NA
Antiporter and transmembrane proteins	5D_YR.wsnp_Ex_c65985_64188864	Breeding progress	TraesCS5D01G123100.1	U-box domain-containing protein	PF04564: U-box domain	IPR000225: Armadillo; IPR003613: U box domain; IPR011989: Armadillo-like helical; IPR013083: Zinc finger, RING/FYVE/PHD-type; IPR016024: Armadillo-type fold	GO:0004842 MF: ubiquitin-protein transferase activity;GO:0005488 MF: binding;GO:0005515 MF: protein binding;GO:0016567 BP: protein ubiquitination	IPR000225; IPR003613; IPR011989; IPR013083; IPR016024	GO:0004842; GO:0005488; GO:0005515; GO:0016567
Metabolism	5D_YR.wsnp_Ex_c65985_64188864	Breeding progress	TraesCS5D01G123200.1	Quinolinate synthase A	PF02657: Fe-S metabolism associated domain; PF02445: Quinolinate synthetase A protein	IPR003473: Quinolinate synthetase A; IPR003808: Fe-S metabolism associated domain, SufE-like	GO:0008987 MF: quinolinate synthetase A activity;GO:0009435 BP: NAD biosynthetic process;GO:0051539 MF: 4 iron, 4 sulfur cluster binding	IPR003473; IPR003808	GO:0008987; GO:0009435; GO:0051539
Antiporter and transmembrane proteins	5D_YR.wsnp_Ex_c65985_64188864	Breeding progress	TraesCS5D01G123300.4	Ubiquitin carboxyl-terminal hydrolase, putative	PF00917: MATH domain; PF00443: Ubiquitin carboxyl-terminal hydrolase; PF12436: ICP0-binding domain of Ubiquitin-specific protease 7; PF14533: Ubiquitin-specific protease C-terminal	IPR001394: Peptidase C19, ubiquitin carboxyl-terminal hydrolase; IPR002083: MATH/TRAF domain; IPR008974: TRAF-like; IPR018200: Ubiquitin specific protease, conserved site; IPR024729: Ubiquitin carboxyl-terminal hydrolase 7, ICP0-binding domain; IPR028889: Ubiquitin specific protease domain; IPR029346: Ubiquitin carboxyl-terminal hydrolase, C-terminal	GO:0005515 MF: protein binding;GO:0006511 BP: ubiquitin-dependent protein catabolic process;GO:0016579 BP: protein deubiquitination;GO:0036459 MF: thiol-dependent ubiquitinyl hydrolase activity	IPR001394; IPR002083; IPR008974; IPR018200; IPR024729; IPR028889; IPR029346	GO:0005515; GO:0006511; GO:0016579; GO:0036459
Others	5D_YR.wsnp_Ex_c65985_64188864	Breeding progress	TraesCS5D01G123400.1	HAUS augmin-like complex subunit 6	PF14661: HAUS augmin-like complex subunit 6 N-terminus	IPR028163: HAUS augmin-like complex subunit 6, N-terminal	NA	IPR028163	NA
Stress and defense related proteins/ Chaperone	5D_YR.wsnp_Ex_c65985_64188864	Breeding progress	TraesCS5D01G123500.1	Regulator of chromosome condensation (RCC1) family protein	PF00415: Regulator of chromosome condensation (RCC1) repeat	IPR000408: Regulator of chromosome condensation, RCC1; IPR009091: Regulator of chromosome condensation 1/beta-lactamase-inhibitor protein II	NA	IPR000408; IPR009091	NA
Others	5D_YR.wsnp_Ex_c65985_64188864	Breeding progress	TraesCS5D01G123600.1	CCR4-NOT transcription complex subunit 11	PF10155: Uncharacterized conserved protein (DUF2363)	IPR019312: CCR4-NOT transcription complex subunit 11	GO:0030014 CC: CCR4-NOT complex	IPR019312	GO:0030014
Others	5D_YR.wsnp_Ex_c65985_64188864	Breeding progress	TraesCS5D01G123700.2	Methyltransferase	PF09273: Rubisco LSMT substrate-binding	IPR015353: Rubisco LSMT, substrate-binding domain	NA	IPR015353	NA
Others	5D_YR.wsnp_Ex_c65985_64188864	Breeding progress	TraesCS5D01G123800.1	Katanin p60 atpase-containing subunit a1	PF00004: ATPase family associated with various cellular activities (AAA); PF09336: Vps4 C terminal oligomerisation domain	IPR003593: AAA+ ATPase domain; IPR003959: ATPase, AAA-type, core; IPR003960: ATPase, AAA-type, conserved site; IPR015415: Vps4 oligomerisation, C-terminal; IPR027417: P-loop containing nucleoside triphosphate hydrolase	GO:0005524 MF: ATP binding	IPR003593; IPR003959; IPR003960; IPR015415; IPR027417	GO:0005524
Signal transduction	5D_YR.wsnp_Ex_c65985_64188864	Breeding progress	TraesCS5D01G124000.1	Calcium-dependent protein kinase, putative	PF00069: Protein kinase domain; PF13499: EF-hand domain pair	IPR000719: Protein kinase domain; IPR002048: EF-hand domain; IPR008271: Serine/threonine-protein kinase, active site; IPR011009: Protein kinase-like domain; IPR011992: EF-hand domain pair; IPR017441: Protein kinase, ATP binding site; IPR018247: EF-Hand 1, calcium-binding site	GO:0004672 MF: protein kinase activity;GO:0005509 MF: calcium ion binding;GO:0005524 MF: ATP binding;GO:0006468 BP: protein phosphorylation	IPR000719; IPR002048; IPR008271; IPR011009; IPR011992; IPR017441; IPR018247	GO:0004672; GO:0005509; GO:0005524; GO:0006468
Stress and defense related proteins/ Chaperone	5D_YR.wsnp_Ex_c65985_64188864	Breeding progress	TraesCS5D01G124200.1	Zinc finger protein	PF02375: jmjN domain; PF02373: JmjC domain, hydroxylase	IPR003347: JmjC domain; IPR003349: JmjN domain; IPR013087: Zinc finger C2H2-type	GO:0003676 MF: nucleic acid binding	IPR003347; IPR003349; IPR013087	GO:0003676
Others	5D_YR.wsnp_Ex_c65985_64188864	Breeding progress	TraesCS5D01G124500.1	Aspartate carbamoyltransferase	PF02729: Aspartate/ornithine carbamoyltransferase, carbamoyl-P binding domain; PF00185: Aspartate/ornithine carbamoyltransferase, Asp/Orn binding domain	IPR002082: Aspartate carbamoyltransferase; IPR006130: Aspartate/ornithine carbamoyltransferase; IPR006131: Aspartate/ornithine carbamoyltransferase, Asp/Orn-binding domain; IPR006132: Aspartate/ornithine carbamoyltransferase, carbamoyl-P binding	GO:0004070 MF: aspartate carbamoyltransferase activity;GO:0006207 BP: 'de novo' pyrimidine nucleobase biosynthetic process;GO:0006520 BP: cellular amino acid metabolic process;GO:0016597 MF: amino acid binding;GO:0016743 MF: carboxyl- or carbamoyltransferase activity	IPR002082; IPR006130; IPR006131; IPR006132	GO:0004070; GO:0006207; GO:0006520; GO:0016597; GO:0016743
Transcription factors and translation	5D_YR.wsnp_Ex_c65985_64188864	Breeding progress	TraesCS5D01G124600.1	Transcription factor	PF07777: G-box binding protein MFMR; PF16596: Disordered region downstream of MFMR; PF00170: bZIP transcription factor	IPR004827: Basic-leucine zipper domain; IPR012900: G-box binding protein, multifunctional mosaic region	GO:0003700 MF: transcription factor activity, sequence-specific DNA binding;GO:0006355 BP: regulation of transcription, DNA-templated;GO:0043565 MF: sequence-specific DNA binding	IPR004827; IPR012900	GO:0003700; GO:0006355; GO:0043565
Others	5D_YR.wsnp_Ex_c65985_64188864	Breeding progress	TraesCS5D01G124700.1	NAD-dependent protein deacylase	PF02146: Sir2 family	IPR003000: Sirtuin family; IPR026587: Sirtuin, class II; IPR026590: Sirtuin family, catalytic core domain; IPR029035: DHS-like NAD/FAD-binding domain	GO:0070403 MF: NAD+ binding	IPR003000; IPR026587; IPR026590; IPR029035	GO:0070403
Repair, protection and cell wall modification	5D_YR.wsnp_Ex_c65985_64188864	Breeding progress	TraesCS5D01G124800.1	Dynamin family protein, putative, expressed	PF00350: Dynamin family	IPR001401: Dynamin, GTPase domain; IPR022812: Dynamin superfamily; IPR027417: P-loop containing nucleoside triphosphate hydrolase; IPR030381: Dynamin-type guanine nucleotide-binding (G) domain	GO:0003924 MF: GTPase activity;GO:0005525 MF: GTP binding	IPR001401; IPR022812; IPR027417; IPR030381	GO:0003924; GO:0005525
Others	5D_YR.wsnp_Ex_c65985_64188864	Breeding progress	TraesCS5D01G124900.1	WD-repeat protein, putative	PF00400: WD domain, G-beta repeat	IPR001680: WD40 repeat; IPR015943: WD40/YVTN repeat-like-containing domain; IPR017986: WD40-repeat-containing domain; IPR019775: WD40 repeat, conserved site; IPR020472: G-protein beta WD-40 repeat	GO:0005515 MF: protein binding	IPR001680; IPR015943; IPR017986; IPR019775; IPR020472	GO:0005515
Regulation of transcription	5D_YR.wsnp_Ex_c65985_64188864	Breeding progress	TraesCS5D01G125100.1	ATP dependent RNA helicase	PF00270: DEAD/DEAH box helicase; PF00271: Helicase conserved C-terminal domain	IPR000629: ATP-dependent RNA helicase DEAD-box, conserved site; IPR001650: Helicase, C-terminal; IPR011545: DEAD/DEAH box helicase domain; IPR014001: Helicase superfamily 1/2, ATP-binding domain; IPR014014: RNA helicase, DEAD-box type, Q motif; IPR027417: P-loop containing nucleoside triphosphate hydrolase	GO:0003676 MF: nucleic acid binding;GO:0005524 MF: ATP binding	IPR000629; IPR001650; IPR011545; IPR014001; IPR014014; IPR027417	GO:0003676; GO:0005524
Transcription factors and translation	5D_YR.wsnp_Ex_c65985_64188864	Breeding progress	TraesCS5D01G125200.1	Myb/SANT-like DNA-binding domain protein	PF12776: Myb/SANT-like DNA-binding domain	IPR024752: Myb/SANT-like domain	NA	IPR024752	NA
Signal transduction	5D_YR.wsnp_Ex_c65985_64188864	Breeding progress	TraesCS5D01G125300.1	Receptor-like kinase	PF00582: Universal stress protein family; PF00069: Protein kinase domain	IPR000719: Protein kinase domain; IPR006016: UspA; IPR008271: Serine/threonine-protein kinase, active site; IPR011009: Protein kinase-like domain; IPR014729: Rossmann-like alpha/beta/alpha sandwich fold	GO:0004672 MF: protein kinase activity;GO:0005524 MF: ATP binding;GO:0006468 BP: protein phosphorylation;GO:0006950 BP: response to stress	IPR000719; IPR006016; IPR008271; IPR011009; IPR014729	GO:0004672; GO:0005524; GO:0006468; GO:0006950
Regulation of transcription	5D_YR.wsnp_Ex_c65985_64188864	Breeding progress	TraesCS5D01G125400.1	DNA-directed RNA polymerase subunit 10-like protein	PF01194: RNA polymerases N / 8 kDa subunit	IPR000268: DNA-directed RNA polymerase, subunit N/Rpb10; IPR023580: RNA polymerase subunit RPB10	GO:0003677 MF: DNA binding;GO:0003899 MF: DNA-directed 5'-3' RNA polymerase activity;GO:0006351 BP: transcription, DNA-templated	IPR000268; IPR023580	GO:0003677; GO:0003899; GO:0006351
Stress and defense related proteins/ Chaperone	5D_YR.wsnp_Ex_c65985_64188864	Breeding progress	TraesCS5D01G125500.1	Chaperone protein DNAj, putative	PF00226: DnaJ domain; PF01556: DnaJ C terminal domain; PF00684: DnaJ central domain	IPR001305: Heat shock protein DnaJ, cysteine-rich domain; IPR001623: DnaJ domain; IPR002939: Chaperone DnaJ, C-terminal; IPR008971: HSP40/DnaJ peptide-binding; IPR012724: Chaperone DnaJ; IPR018253: DnaJ domain, conserved site	GO:0005524 MF: ATP binding;GO:0006457 BP: protein folding;GO:0009408 BP: response to heat;GO:0031072 MF: heat shock protein binding;GO:0051082 MF: unfolded protein binding	IPR001305; IPR001623; IPR002939; IPR008971; IPR012724; IPR018253	GO:0005524; GO:0006457; GO:0009408; GO:0031072; GO:0051082
Antiporter and transmembrane proteins	5D_YR.wsnp_Ex_c65985_64188864	Breeding progress	TraesCS5D01G125700.1	Amino acid permease	PF01490: Transmembrane amino acid transporter protein	IPR013057: Amino acid transporter, transmembrane domain	NA	IPR013057	NA
Redox homeostasis and detoxification	5D_YR.wsnp_Ex_c65985_64188864	Breeding progress	TraesCS5D01G126000.1	Dihydrolipoamide acetyltransferase component of pyruvate dehydrogenase complex	PF00364: Biotin-requiring enzyme; PF02817: e3 binding domain; PF00198: 2-oxoacid dehydrogenases acyltransferase (catalytic domain)	IPR000089: Biotin/lipoyl attachment; IPR001078: 2-oxoacid dehydrogenase acyltransferase, catalytic domain; IPR003016: 2-oxo acid dehydrogenase, lipoyl-binding site; IPR004167: E3-binding domain; IPR011053: Single hybrid motif	GO:0008152 BP: metabolic process;GO:0016746 MF: transferase activity, transferring acyl groups	IPR000089; IPR001078; IPR003016; IPR004167; IPR011053	GO:0008152; GO:0016746
Signal transduction	5D_YR.wsnp_Ex_c65985_64188864	Breeding progress	TraesCS5D01G126100.1	Receptor protein kinase	PF13855: Leucine rich repeat; PF00069: Protein kinase domain	IPR000719: Protein kinase domain; IPR001611: Leucine-rich repeat; IPR003591: Leucine-rich repeat, typical subtype; IPR011009: Protein kinase-like domain; IPR032675: Leucine-rich repeat domain, L domain-like	GO:0004672 MF: protein kinase activity;GO:0005515 MF: protein binding;GO:0005524 MF: ATP binding;GO:0006468 BP: protein phosphorylation	IPR000719; IPR001611; IPR003591; IPR011009; IPR032675	GO:0004672; GO:0005515; GO:0005524; GO:0006468
Others	5D_YR.wsnp_Ex_c65985_64188864	Breeding progress	TraesCS5D01G126500.1	Cx9C motif-containing protein 4, mitochondrial	PF08991: Mature-T-Cell Proliferation I type	IPR009069: Cysteine alpha-hairpin motif superfamily; IPR027179: Mature-T-Cell Proliferation I type	NA	IPR009069; IPR027179	NA
Redox homeostasis and detoxification	5D_YR.wsnp_Ex_c65985_64188864	Breeding progress	TraesCS5D01G126600.1	Histone deacetylase family protein, expressed	PF00850: Histone deacetylase domain	IPR000286: Histone deacetylase superfamily; IPR023801: Histone deacetylase domain	NA	IPR000286; IPR023801	NA
Redox homeostasis and detoxification	5D_YR.wsnp_Ex_c65985_64188864	Breeding progress	TraesCS5D01G126700.1	Pyruvate dehydrogenase E1 component alpha subunit	PF00676: Dehydrogenase E1 component	IPR001017: Dehydrogenase, E1 component; IPR029061: Thiamin diphosphate-binding fold	GO:0008152 BP: metabolic process;GO:0016624 MF: oxidoreductase activity, acting on the aldehyde or oxo group of donors, disulfide as acceptor	IPR001017; IPR029061	GO:0008152; GO:0016624
Signal transduction	5D_YR.wsnp_Ex_c65985_64188864	Breeding progress	TraesCS5D01G126800.3	3'(2'),5'-bisphosphate nucleotidase 1	PF00459: Inositol monophosphatase family	IPR000760: Inositol monophosphatase-like; IPR006239: 3(2),5 -bisphosphate nucleotidase HAL2; IPR020550: Inositol monophosphatase, conserved site; IPR020583: Inositol monophosphatase, metal-binding site	GO:0006790 BP: sulfur compound metabolic process;GO:0008441 MF: 3'(2'),5'-bisphosphate nucleotidase activity;GO:0046854 BP: phosphatidylinositol phosphorylation	IPR000760; IPR006239; IPR020550; IPR020583	GO:0006790; GO:0008441; GO:0046854
Others	5D_YR.wsnp_Ex_c65985_64188864	Breeding progress	TraesCS5D01G126900.3	La protein homolog	PF07145: Ataxin-2 C-terminal region; PF05383: La domain; PF00076: RNA recognition motif. (a.k.a. RRM, RBD, or RNP domain)	IPR000504: RNA recognition motif domain; IPR002344: Lupus La protein; IPR006630: RNA-binding protein Lupus La; IPR009818: Ataxin-2, C-terminal; IPR011991: Winged helix-turn-helix DNA-binding domain	GO:0003676 MF: nucleic acid binding;GO:0003723 MF: RNA binding;GO:0005634 CC: nucleus;GO:0006396 BP: RNA processing;GO:0030529 CC: intracellular ribonucleoprotein complex	IPR000504; IPR002344; IPR006630; IPR009818; IPR011991	GO:0003676; GO:0003723; GO:0005634; GO:0006396; GO:0030529
Regulation of transcription	5D_YR.wsnp_Ex_c65985_64188864	Breeding progress	TraesCS5D01G127000.1	RNA helicase	PF00270: DEAD/DEAH box helicase; PF00271: Helicase conserved C-terminal domain; PF13959: Domain of unknown function (DUF4217)	IPR000629: ATP-dependent RNA helicase DEAD-box, conserved site; IPR001650: Helicase, C-terminal; IPR011545: DEAD/DEAH box helicase domain; IPR014001: Helicase superfamily 1/2, ATP-binding domain; IPR014014: RNA helicase, DEAD-box type, Q motif; IPR025313: Domain of unknown function DUF4217; IPR027417: P-loop containing nucleoside triphosphate hydrolase	GO:0003676 MF: nucleic acid binding;GO:0005524 MF: ATP binding	IPR000629; IPR001650; IPR011545; IPR014001; IPR014014; IPR025313; IPR027417	GO:0003676; GO:0005524
Transcription factors and translation	5D_YR.wsnp_Ex_c65985_64188864	Breeding progress	TraesCS5D01G127100.1	S-adenosyl-L-methionine-dependent methyltransferases superfamily protein	PF03141: Putative S-adenosyl-L-methionine-dependent methyltransferase	IPR004159: Putative S-adenosyl-L-methionine-dependent methyltransferase; IPR029063: S-adenosyl-L-methionine-dependent methyltransferase	GO:0008168 MF: methyltransferase activity	IPR004159; IPR029063	GO:0008168
Redox homeostasis and detoxification	5D_YR.wsnp_Ex_c65985_64188864	Breeding progress	TraesCS5D01G127200.2	Peroxidase	PF00141: Peroxidase	IPR002016: Haem peroxidase, plant/fungal/bacterial; IPR002207: Plant ascorbate peroxidase; IPR010255: Haem peroxidase; IPR019793: Peroxidases heam-ligand binding site	GO:0004601 MF: peroxidase activity;GO:0006979 BP: response to oxidative stress;GO:0020037 MF: heme binding;GO:0055114 BP: oxidation-reduction process	IPR002016; IPR002207; IPR010255; IPR019793	GO:0004601; GO:0006979; GO:0020037; GO:0055114
Redox homeostasis and detoxification	5D_YR.wsnp_Ex_c65985_64188864	Breeding progress	TraesCS5D01G127300.2	Aldehyde dehydrogenase	PF00171: Aldehyde dehydrogenase family	IPR012394: Aldehyde dehydrogenase NAD(P)-dependent; IPR015590: Aldehyde dehydrogenase domain; IPR016161: Aldehyde/histidinol dehydrogenase; IPR016162: Aldehyde dehydrogenase N-terminal domain	GO:0004030 MF: aldehyde dehydrogenase [NAD(P)+] activity;GO:0006081 BP: cellular aldehyde metabolic process;GO:0008152 BP: metabolic process;GO:0016491 MF: oxidoreductase activity;GO:0055114 BP: oxidation-reduction process	IPR012394; IPR015590; IPR016161; IPR016162	GO:0004030; GO:0006081; GO:0008152; GO:0016491; GO:0055114
Osmo-protectant synthesis related protein	5D_YR.wsnp_Ex_c65985_64188864	Breeding progress	TraesCS5D01G127400.1	30S ribosomal protein S12	PF00164: Ribosomal protein S12/S23	IPR005679: Ribosomal protein S12, bacterial-type; IPR006032: Ribosomal protein S12/S23; IPR012340: Nucleic acid-binding, OB-fold	GO:0003735 MF: structural constituent of ribosome;GO:0005622 CC: intracellular;GO:0005840 CC: ribosome;GO:0006412 BP: translation;GO:0015935 CC: small ribosomal subunit	IPR005679; IPR006032; IPR012340	GO:0003735; GO:0005622; GO:0005840; GO:0006412; GO:0015935
Redox homeostasis and detoxification	5D_YR.wsnp_Ex_c65985_64188864	Breeding progress	TraesCS5D01G127500.1	NADH-ubiquinone oxidoreductase chain 3	PF00507: NADH-ubiquinone/plastoquinone oxidoreductase, chain 3	IPR000440: NADH:ubiquinone/plastoquinone oxidoreductase, chain 3	GO:0008137 MF: NADH dehydrogenase (ubiquinone) activity;GO:0055114 BP: oxidation-reduction process	IPR000440	GO:0008137; GO:0055114
Others	5D_YR.wsnp_Ex_c65985_64188864	Breeding progress	TraesCS5D01G127600.1	WD40 repeat-containing protein	PF00400: WD domain, G-beta repeat	IPR001680: WD40 repeat; IPR015943: WD40/YVTN repeat-like-containing domain; IPR017986: WD40-repeat-containing domain	GO:0005515 MF: protein binding	IPR001680; IPR015943; IPR017986	GO:0005515
Others	5D_YR.wsnp_Ex_c65985_64188864	Breeding progress	TraesCS5D01G127800.1	Protein SUPPRESSOR OF GENE SILENCING 3	PF03468: XS domain	IPR005380: XS domain	GO:0031047 BP: gene silencing by RNA	IPR005380	GO:0031047
Others	5D_YR.wsnp_Ex_c65985_64188864	Breeding progress	TraesCS5D01G127900.1	O-fucosyltransferase-like protein	PF10250: GDP-fucose protein O-fucosyltransferase	IPR019378: GDP-fucose protein O-fucosyltransferase	NA	IPR019378	NA
Transcription factors and translation	5D_YR.wsnp_Ex_c65985_64188864	Breeding progress	TraesCS5D01G128100.1	arginine N-methyltransferase, putative (DUF688)	PF05097: Protein of unknown function (DUF688)	IPR007789: Protein of unknown function DUF688	NA	IPR007789	NA
Transcription factors and translation	5D_YR.wsnp_Ex_c65985_64188864	Breeding progress	TraesCS5D01G128200.2	MYB transcription factor	PF00249: Myb-like DNA-binding domain	IPR001005: SANT/Myb domain; IPR009057: Homeobox domain-like; IPR017877: Myb-like domain; IPR017930: Myb domain	GO:0003677 MF: DNA binding	IPR001005; IPR009057; IPR017877; IPR017930	GO:0003677
Antiporter and transmembrane proteins	5D_YR.wsnp_Ex_c65985_64188864	Breeding progress	TraesCS5D01G128300.2	Transmembrane 9 superfamily member	PF02990: Endomembrane protein 70	IPR004240: Nonaspanin (TM9SF)	GO:0016021 CC: integral component of membrane	IPR004240	GO:0016021
Protein maturation	5D_YR.wsnp_Ex_c65985_64188864	Breeding progress	TraesCS5D01G128400.1	Fe/S biogenesis protein nfuA	PF01106: NifU-like domain	IPR001075: NIF system FeS cluster assembly, NifU, C-terminal	GO:0005506 MF: iron ion binding;GO:0016226 BP: iron-sulfur cluster assembly;GO:0051536 MF: iron-sulfur cluster binding	IPR001075	GO:0005506; GO:0016226; GO:0051536
Others	5D_YR.wsnp_Ex_c65985_64188864	Breeding progress	TraesCS5D01G128600.1	Replication factor C subunit	PF00004: ATPase family associated with various cellular activities (AAA); PF08542: Replication factor C C-terminal domain	IPR003593: AAA+ ATPase domain; IPR003959: ATPase, AAA-type, core; IPR008921: DNA polymerase III, clamp loader complex, gamma/delta/delta subunit, C-terminal; IPR013748: Replication factor C, C-terminal; IPR027417: P-loop containing nucleoside triphosphate hydrolase	GO:0003677 MF: DNA binding;GO:0005524 MF: ATP binding;GO:0006260 BP: DNA replication	IPR003593; IPR003959; IPR008921; IPR013748; IPR027417	GO:0003677; GO:0005524; GO:0006260
Transcription factors and translation	5D_YR.wsnp_Ex_c65985_64188864	Breeding progress	TraesCS5D01G128700.1	SWI/SNF complex subunit SWI3C	PF04433: SWIRM domain; PF00249: Myb-like DNA-binding domain; PF16495: SWIRM-associated region 1	IPR001005: SANT/Myb domain; IPR007526: SWIRM domain; IPR009057: Homeobox domain-like; IPR011991: Winged helix-turn-helix DNA-binding domain; IPR017884: SANT domain; IPR032451: SMARCC, C-terminal	GO:0003677 MF: DNA binding;GO:0005515 MF: protein binding	IPR001005; IPR007526; IPR009057; IPR011991; IPR017884; IPR032451	GO:0003677; GO:0005515
Others	5D_YR.wsnp_Ex_c65985_64188864	Breeding progress	TraesCS5D01G128800.1	Aspartic proteinase Asp1	PF14543: Xylanase inhibitor N-terminal; PF14541: Xylanase inhibitor C-terminal	IPR001461: Aspartic peptidase A1 family; IPR001969: Aspartic peptidase, active site; IPR021109: Aspartic peptidase domain; IPR032799: Xylanase inhibitor, C-terminal; IPR032861: Xylanase inhibitor, N-terminal; IPR033121: Peptidase family A1 domain	GO:0004190 MF: aspartic-type endopeptidase activity;GO:0006508 BP: proteolysis	IPR001461; IPR001969; IPR021109; IPR032799; IPR032861; IPR033121	GO:0004190; GO:0006508
Others	5D_YR.wsnp_Ex_c65985_64188864	Breeding progress	TraesCS5D01G128900.1	B3 domain-containing protein family	PF02362: B3 DNA binding domain	IPR003340: B3 DNA binding domain; IPR015300: DNA-binding pseudobarrel domain	GO:0003677 MF: DNA binding	IPR003340; IPR015300	GO:0003677
Antiporter and transmembrane proteins	5D_YR.wsnp_Ex_c65985_64188864	Breeding progress	TraesCS5D01G129000.1	Amino acid permease	PF01490: Transmembrane amino acid transporter protein	IPR013057: Amino acid transporter, transmembrane domain	NA	IPR013057	NA
Osmo-protectant synthesis related protein	5D_YR.wsnp_Ex_c65985_64188864	Breeding progress	TraesCS5D01G129200.1	Ribosomal protein L3	PF00297: Ribosomal protein L3	IPR000597: Ribosomal protein L3; IPR009000: Translation protein, beta-barrel domain; IPR019926: Ribosomal protein L3, conserved site	GO:0003735 MF: structural constituent of ribosome;GO:0005622 CC: intracellular;GO:0005840 CC: ribosome;GO:0006412 BP: translation	IPR000597; IPR009000; IPR019926	GO:0003735; GO:0005622; GO:0005840; GO:0006412
Others	5D_YR.wsnp_Ex_c65985_64188864	Breeding progress	TraesCS5D01G129300.2	5-formyltetrahydrofolate cyclo-ligase	PF01812: 5-formyltetrahydrofolate cyclo-ligase family	IPR002698: 5-formyltetrahydrofolate cyclo-ligase	NA	IPR002698	NA
Transcription factors and translation	5D_YR.wsnp_Ex_c65985_64188864	Breeding progress	TraesCS5D01G129400.1	Ethylene-responsive transcription factor	PF00847: AP2 domain	IPR001471: AP2/ERF domain; IPR016177: DNA-binding domain	GO:0003677 MF: DNA binding;GO:0003700 MF: transcription factor activity, sequence-specific DNA binding;GO:0006355 BP: regulation of transcription, DNA-templated	IPR001471; IPR016177	GO:0003677; GO:0003700; GO:0006355
Regulation of transcription	5D_YR.wsnp_Ex_c65985_64188864	Breeding progress	TraesCS5D01G129500.1	RNA polymerase II subunit A C-terminal domain phosphatase SSU72	PF04722: Ssu72-like protein	IPR006811: RNA polymerase II subunit A	GO:0004721 MF: phosphoprotein phosphatase activity;GO:0005634 CC: nucleus;GO:0006397 BP: mRNA processing	IPR006811	GO:0004721; GO:0005634; GO:0006397
Sugar metabolism	5D_YR.wsnp_Ex_c65985_64188864	Breeding progress	TraesCS5D01G129600.1	Trehalose-6-phosphate synthase, putative	PF00982: Glycosyltransferase family 20; PF02358: Trehalose-phosphatase	IPR001830: Glycosyl transferase, family 20; IPR003337: Trehalose-phosphatase; IPR006379: HAD-superfamily hydrolase, subfamily IIB; IPR023214: HAD-like domain	GO:0003824 MF: catalytic activity;GO:0005992 BP: trehalose biosynthetic process	IPR001830; IPR003337; IPR006379; IPR023214	GO:0003824; GO:0005992
Stress and defense related proteins/ Chaperone	5D_YR.wsnp_Ex_c65985_64188864	Breeding progress	TraesCS5D01G129700.1	Chaperone protein dnaJ	PF00226: DnaJ domain; PF01556: DnaJ C terminal domain; PF00684: DnaJ central domain	IPR001305: Heat shock protein DnaJ, cysteine-rich domain; IPR001623: DnaJ domain; IPR002939: Chaperone DnaJ, C-terminal; IPR008971: HSP40/DnaJ peptide-binding; IPR012724: Chaperone DnaJ; IPR018253: DnaJ domain, conserved site	GO:0005524 MF: ATP binding;GO:0006457 BP: protein folding;GO:0009408 BP: response to heat;GO:0031072 MF: heat shock protein binding;GO:0051082 MF: unfolded protein binding	IPR001305; IPR001623; IPR002939; IPR008971; IPR012724; IPR018253	GO:0005524; GO:0006457; GO:0009408; GO:0031072; GO:0051082
Others	5D_YR.wsnp_Ex_c65985_64188864	Breeding progress	TraesCS5D01G129800.1	Long chain acyl-CoA synthetase	PF00501: AMP-binding enzyme	IPR000873: AMP-dependent synthetase/ligase; IPR020845: AMP-binding, conserved site	GO:0003824 MF: catalytic activity;GO:0008152 BP: metabolic process	IPR000873; IPR020845	GO:0003824; GO:0008152
Antiporter and transmembrane proteins	5D_YR.wsnp_Ex_c65985_64188864	Breeding progress	TraesCS5D01G129900.2	GATA transcription factor	PF00320: GATA zinc finger	IPR000679: Zinc finger, GATA-type; IPR013088: Zinc finger, NHR/GATA-type	GO:0003700 MF: transcription factor activity, sequence-specific DNA binding;GO:0006355 BP: regulation of transcription, DNA-templated;GO:0008270 MF: zinc ion binding;GO:0043565 MF: sequence-specific DNA binding	IPR000679; IPR013088	GO:0003700; GO:0006355; GO:0008270; GO:0043565
Antiporter and transmembrane proteins	5D_YR.wsnp_Ex_c65985_64188864	Breeding progress	TraesCS5D01G130000.1	V-type proton ATPase proteolipid subunit	PF00137: ATP synthase subunit C	IPR000245: V-ATPase proteolipid subunit; IPR002379: V-ATPase proteolipid subunit C-like domain; IPR011555: V-ATPase proteolipid subunit C, eukaryotic	GO:0015078 MF: hydrogen ion transmembrane transporter activity;GO:0015991 BP: ATP hydrolysis coupled proton transport;GO:0033177 CC: proton-transporting two-sector ATPase complex, proton-transporting domain;GO:0033179 CC: proton-transporting V-type ATPase, V0 domain	IPR000245; IPR002379; IPR011555	GO:0015078; GO:0015991; GO:0033177; GO:0033179
Transcription factors and translation	5D_YR.wsnp_Ex_c65985_64188864	Breeding progress	TraesCS5D01G130100.1	Filament-like plant protein	PF05911: Filament-like plant protein, long coiled-coil	IPR008587: Filament-like plant protein	NA	IPR008587	NA
Others	5D_YR.wsnp_Ex_c65985_64188864	Breeding progress	TraesCS5D01G130200.1	CBS domain-containing protein, putative, expressed	PF00571: CBS domain; PF00564: PB1 domain	IPR000270: PB1 domain; IPR000644: CBS domain	GO:0005515 MF: protein binding	IPR000270; IPR000644	GO:0005515
Others	5D_YR.wsnp_Ex_c65985_64188864	Breeding progress	TraesCS5D01G130300.1	Alpha-(1,4)-fucosyltransferase	PF00852: Glycosyltransferase family 10 (fucosyltransferase) C-term	IPR001503: Glycosyl transferase family 10; IPR017177: Alpha-(1, 3)-fucosyltransferase/alpha-(1, 4)-fucosyltransferase, plant	GO:0006486 BP: protein glycosylation;GO:0008417 MF: fucosyltransferase activity;GO:0016020 CC: membrane	IPR001503; IPR017177	GO:0006486; GO:0008417; GO:0016020
Others	5D_YR.TA002565_0478	Breeding progress	TraesCS5D01G094600.1	Importin subunit beta-1	PF03810: Importin-beta N-terminal domain; PF13513: HEAT-like repeat	IPR001494: Importin-beta, N-terminal domain; IPR011989: Armadillo-like helical; IPR016024: Armadillo-type fold	GO:0005488 MF: binding;GO:0006886 BP: intracellular protein transport;GO:0008536 MF: Ran GTPase binding	IPR001494; IPR011989; IPR016024	GO:0005488; GO:0006886; GO:0008536
Signal transduction	5D_YR.TA002565_0478	Breeding progress	TraesCS5D01G094700.1	Receptor protein kinase-like protein	PF12819: Carbohydrate-binding protein of the ER; PF07714: Protein tyrosine kinase	IPR000719: Protein kinase domain; IPR001245: Serine-threonine/tyrosine-protein kinase, catalytic domain; IPR008271: Serine/threonine-protein kinase, active site; IPR011009: Protein kinase-like domain; IPR017441: Protein kinase, ATP binding site; IPR024788: Malectin-like carbohydrate-binding domain	GO:0004672 MF: protein kinase activity;GO:0005524 MF: ATP binding;GO:0006468 BP: protein phosphorylation	IPR000719; IPR001245; IPR008271; IPR011009; IPR017441; IPR024788	GO:0004672; GO:0005524; GO:0006468
Others	5D_YR.TA002565_0478	Breeding progress	TraesCS5D01G094900.1	Pathogenesis-related thaumatin family protein	PF00314: Thaumatin family	IPR001938: Thaumatin	NA	IPR001938	NA
Others	5D_YR.TA002565_0478	Breeding progress	TraesCS5D01G095000.1	Pathogenesis-related thaumatin family protein	PF00314: Thaumatin family	IPR001938: Thaumatin	NA	IPR001938	NA
Others	5D_YR.TA002565_0478	Breeding progress	TraesCS5D01G095100.1	Importin subunit beta-1	PF03810: Importin-beta N-terminal domain; PF13513: HEAT-like repeat	IPR001494: Importin-beta, N-terminal domain; IPR011989: Armadillo-like helical; IPR016024: Armadillo-type fold	GO:0005488 MF: binding;GO:0006886 BP: intracellular protein transport;GO:0008536 MF: Ran GTPase binding	IPR001494; IPR011989; IPR016024	GO:0005488; GO:0006886; GO:0008536
Others	5D_YR.TA002565_0478	Breeding progress	TraesCS5D01G095200.1	CASP-like protein	PF04535: Domain of unknown function (DUF588)	IPR006702: Domain of unknown function DUF588	NA	IPR006702	NA
Signal transduction	5D_YR.TA002565_0478	Breeding progress	TraesCS5D01G095300.1	Receptor-like protein kinase	PF12819: Carbohydrate-binding protein of the ER; PF13855: Leucine rich repeat; PF07714: Protein tyrosine kinase	IPR000719: Protein kinase domain; IPR001245: Serine-threonine/tyrosine-protein kinase, catalytic domain; IPR001611: Leucine-rich repeat; IPR008271: Serine/threonine-protein kinase, active site; IPR011009: Protein kinase-like domain; IPR017441: Protein kinase, ATP binding site; IPR024788: Malectin-like carbohydrate-binding domain; IPR032675: Leucine-rich repeat domain, L domain-like	GO:0004672 MF: protein kinase activity;GO:0005515 MF: protein binding;GO:0005524 MF: ATP binding;GO:0006468 BP: protein phosphorylation	IPR000719; IPR001245; IPR001611; IPR008271; IPR011009; IPR017441; IPR024788; IPR032675	GO:0004672; GO:0005515; GO:0005524; GO:0006468
Osmo-protectant synthesis related protein	5D_YR.TA002565_0478	Breeding progress	TraesCS5D01G095400.1	50S ribosomal protein L2	PF00181: Ribosomal Proteins L2, RNA binding domain; PF03947: Ribosomal Proteins L2, C-terminal domain	IPR002171: Ribosomal protein L2; IPR008991: Translation protein SH3-like domain; IPR012340: Nucleic acid-binding, OB-fold; IPR014722: Ribosomal protein L2 domain 2; IPR014726: Ribosomal protein L2, domain 3; IPR022666: Ribosomal Proteins L2, RNA binding domain; IPR022669: Ribosomal protein L2, C-terminal; IPR022671: Ribosomal protein L2, conserved site; IPR023672: Ribosomal protein L2, archaeal-t…	GO:0003723 MF: RNA binding;GO:0003735 MF: structural constituent of ribosome;GO:0005622 CC: intracellular;GO:0005840 CC: ribosome;GO:0006412 BP: translation;GO:0015934 CC: large ribosomal subunit	IPR002171; IPR008991; IPR012340; IPR014722; IPR014726; IPR022666; IPR022669; IPR022671; IPR023672	GO:0003723; GO:0003735; GO:0005622; GO:0005840; GO:0006412; GO:0015934
Transcription factors and translation	5D_YR.TA002565_0478	Breeding progress	TraesCS5D01G095600.1	MYB transcription factor	PF00249: Myb-like DNA-binding domain	IPR001005: SANT/Myb domain; IPR009057: Homeobox domain-like; IPR017930: Myb domain	GO:0003677 MF: DNA binding	IPR001005; IPR009057; IPR017930	GO:0003677
Others	5D_YR.TA002565_0478	Breeding progress	TraesCS5D01G095700.1	Diaminopimelate epimerase	PF01678: Diaminopimelate epimerase	IPR001653: Diaminopimelate epimerase, DapF; IPR018510: Diaminopimelate epimerase, active site	GO:0005737 CC: cytoplasm;GO:0008837 MF: diaminopimelate epimerase activity;GO:0009089 BP: lysine biosynthetic process via diaminopimelate	IPR001653; IPR018510	GO:0005737; GO:0008837; GO:0009089
Stress and defense related proteins/ Chaperone	5D_YR.TA002565_0478	Breeding progress	TraesCS5D01G095800.1	UNC93-like protein	PF05978: Ion channel regulatory protein UNC-93	IPR010291: Ion channel regulatory protein, UNC-93; IPR020846: Major facilitator superfamily domain	NA	IPR010291; IPR020846	NA
Antiporter and transmembrane proteins	5D_YR.TA002565_0478	Breeding progress	TraesCS5D01G096000.1	RING/U-box superfamily protein	PF13639: Ring finger domain	IPR001841: Zinc finger, RING-type; IPR013083: Zinc finger, RING/FYVE/PHD-type	GO:0005515 MF: protein binding;GO:0008270 MF: zinc ion binding	IPR001841; IPR013083	GO:0005515; GO:0008270
Signal transduction	5D_YR.TA002565_0478	Breeding progress	TraesCS5D01G096200.1	Protein kinase family protein	PF13947: Wall-associated receptor kinase galacturonan-binding; PF07645: Calcium-binding EGF domain; PF00069: Protein kinase domain	IPR000152: EGF-type aspartate/asparagine hydroxylation site; IPR000719: Protein kinase domain; IPR000742: EGF-like domain; IPR001881: EGF-like calcium-binding domain; IPR008271: Serine/threonine-protein kinase, active site; IPR011009: Protein kinase-like domain; IPR017441: Protein kinase, ATP binding site; IPR018097: EGF-like calcium-binding, conserved site; IPR025287: Wall-associated receptor ki…	GO:0004672 MF: protein kinase activity;GO:0005509 MF: calcium ion binding;GO:0005515 MF: protein binding;GO:0005524 MF: ATP binding;GO:0006468 BP: protein phosphorylation;GO:0030247 MF: polysaccharide binding	IPR000152; IPR000719; IPR000742; IPR001881; IPR008271; IPR011009; IPR017441; IPR018097; IPR025287	GO:0004672; GO:0005509; GO:0005515; GO:0005524; GO:0006468; GO:0030247
Others	5D_YR.TA002565_0478	Breeding progress	TraesCS5D01G096300.1	GDSL esterase/lipase	PF00657: GDSL-like Lipase/Acylhydrolase	IPR001087: GDSL lipase/esterase	GO:0016788 MF: hydrolase activity, acting on ester bonds	IPR001087	GO:0016788
Stress and defense related proteins/ Chaperone	5D_YR.TA002565_0478	Breeding progress	TraesCS5D01G096400.1	UNC93-like protein	PF05978: Ion channel regulatory protein UNC-93	IPR010291: Ion channel regulatory protein, UNC-93; IPR020846: Major facilitator superfamily domain	NA	IPR010291; IPR020846	NA
Antiporter and transmembrane proteins	5D_YR.TA002565_0478	Breeding progress	TraesCS5D01G096500.1	RING/U-box superfamily protein	PF13639: Ring finger domain	IPR001841: Zinc finger, RING-type; IPR013083: Zinc finger, RING/FYVE/PHD-type	GO:0005515 MF: protein binding;GO:0008270 MF: zinc ion binding	IPR001841; IPR013083	GO:0005515; GO:0008270
Antiporter and transmembrane proteins	5D_YR.TA002565_0478	Breeding progress	TraesCS5D01G096600.1	RING/U-box superfamily protein	PF13639: Ring finger domain	IPR001841: Zinc finger, RING-type; IPR013083: Zinc finger, RING/FYVE/PHD-type	GO:0005515 MF: protein binding;GO:0008270 MF: zinc ion binding	IPR001841; IPR013083	GO:0005515; GO:0008270
Signal transduction	5D_YR.TA002565_0478	Breeding progress	TraesCS5D01G096800.1	Protein kinase	PF00139: Legume lectin domain; PF07714: Protein tyrosine kinase	IPR000719: Protein kinase domain; IPR001220: Legume lectin domain; IPR001245: Serine-threonine/tyrosine-protein kinase, catalytic domain; IPR008271: Serine/threonine-protein kinase, active site; IPR011009: Protein kinase-like domain; IPR013320: Concanavalin A-like lectin/glucanase domain; IPR017441: Protein kinase, ATP binding site; IPR019825: Legume lectin, beta chain, Mn/Ca-binding site	GO:0004672 MF: protein kinase activity;GO:0005524 MF: ATP binding;GO:0006468 BP: protein phosphorylation;GO:0030246 MF: carbohydrate binding	IPR000719; IPR001220; IPR001245; IPR008271; IPR011009; IPR013320; IPR017441; IPR019825	GO:0004672; GO:0005524; GO:0006468; GO:0030246
Stress and defense related proteins/ Chaperone	5D_YR.TA002565_0478	Breeding progress	TraesCS5D01G096900.1	Zinc finger C3H1 domain-containing protein	PF10650: Putative zinc-finger domain	IPR011990: Tetratricopeptide-like helical domain; IPR019607: Putative zinc-finger domain	GO:0005515 MF: protein binding	IPR011990; IPR019607	GO:0005515
Others	5D_YR.TA002565_0478	Breeding progress	TraesCS5D01G097000.1	Membrane magnesium transporter	PF10270: Membrane magnesium transporter	IPR018937: Magnesium transporter	NA	IPR018937	NA
Others	5D_YR.TA002565_0478	Breeding progress	TraesCS5D01G097100.1	Succinate--CoA ligase [ADP-forming] subunit beta	PF08442: ATP-grasp domain; PF16114: ATP citrate lyase citrate-binding	IPR013650: ATP-grasp fold, succinyl-CoA synthetase-type; IPR016102: Succinyl-CoA synthetase-like; IPR032263: ATP-citrate synthase, citrate-binding domain	NA	IPR013650; IPR016102; IPR032263	NA
Others	5D_YR.TA002565_0478	Breeding progress	TraesCS5D01G097400.1	Wuschel-related homeobox protein	PF00046: Homeobox domain	IPR001356: Homeobox domain; IPR009057: Homeobox domain-like	GO:0003677 MF: DNA binding	IPR001356; IPR009057	GO:0003677
Others	5D_YR.TA002565_0478	Breeding progress	TraesCS5D01G097500.1	Complex 1 LYR protein	PF05347: Complex 1 protein (LYR family)	IPR008011: Complex 1 LYR protein	NA	IPR008011	NA
Antiporter and transmembrane proteins	5D_YR.TA002565_0478	Breeding progress	TraesCS5D01G097600.1	Boron transporter	PF00955: HCO3- transporter family	IPR011531: Bicarbonate transporter, C-terminal	GO:0006820 BP: anion transport;GO:0016021 CC: integral component of membrane	IPR011531	GO:0006820; GO:0016021
Others	5D_YR.TA002565_0478	Breeding progress	TraesCS5D01G097700.1	Tetratricopeptide repeat protein 7A	PF13432: Tetratricopeptide repeat	IPR011990: Tetratricopeptide-like helical domain; IPR013026: Tetratricopeptide repeat-containing domain; IPR019734: Tetratricopeptide repeat	GO:0005515 MF: protein binding	IPR011990; IPR013026; IPR019734	GO:0005515
Others	5D_YR.TA002565_0478	Breeding progress	TraesCS5D01G097800.1	Pentatricopeptide repeat-containing protein	PF13041: PPR repeat family; PF12854: PPR repeat; PF13812: Pentatricopeptide repeat domain	IPR002625: Smr domain; IPR002885: Pentatricopeptide repeat; IPR011990: Tetratricopeptide-like helical domain	GO:0005515 MF: protein binding	IPR002625; IPR002885; IPR011990	GO:0005515
Signal transduction	5D_YR.TA002565_0478	Breeding progress	TraesCS5D01G097900.1	Protein kinase family protein, putative, expressed	PF00989: PAS fold; PF07714: Protein tyrosine kinase	IPR000014: PAS domain; IPR000719: Protein kinase domain; IPR001245: Serine-threonine/tyrosine-protein kinase, catalytic domain; IPR008271: Serine/threonine-protein kinase, active site; IPR011009: Protein kinase-like domain; IPR013767: PAS fold	GO:0004672 MF: protein kinase activity;GO:0005524 MF: ATP binding;GO:0006355 BP: regulation of transcription, DNA-templated;GO:0006468 BP: protein phosphorylation	IPR000014; IPR000719; IPR001245; IPR008271; IPR011009; IPR013767	GO:0004672; GO:0005524; GO:0006355; GO:0006468
Antiporter and transmembrane proteins	5D_YR.TA002565_0478	Breeding progress	TraesCS5D01G098300.1	Ubiquitin carboxyl-terminal hydrolase-related protein	PF04780: Protein of unknown function (DUF629)	IPR006865: Domain of unknown function DUF629; IPR011990: Tetratricopeptide-like helical domain	GO:0005515 MF: protein binding	IPR006865; IPR011990	GO:0005515
Antiporter and transmembrane proteins	5D_YR.TA002565_0478	Breeding progress	TraesCS5D01G098400.1	Solute carrier family 40 protein	PF06963: Ferroportin1 (FPN1)	IPR009716: Ferroporti-1; IPR020846: Major facilitator superfamily domain	GO:0005381 MF: iron ion transmembrane transporter activity;GO:0016021 CC: integral component of membrane;GO:0034755 BP: iron ion transmembrane transport	IPR009716; IPR020846	GO:0005381; GO:0016021; GO:0034755
Stress and defense related proteins/ Chaperone	5D_YR.TA002565_0478	Breeding progress	TraesCS5D01G098500.1	Disease resistance protein RPM1	PF00931: NB-ARC domain	IPR002182: NB-ARC; IPR011991: Winged helix-turn-helix DNA-binding domain; IPR027417: P-loop containing nucleoside triphosphate hydrolase; IPR032675: Leucine-rich repeat domain, L domain-like	GO:0043531 MF: ADP binding	IPR002182; IPR011991; IPR027417; IPR032675	GO:0043531
Stress and defense related proteins/ Chaperone	5D_YR.TA002565_0478	Breeding progress	TraesCS5D01G098700.1	Disease resistance protein RPM1	PF00931: NB-ARC domain	IPR002182: NB-ARC; IPR011991: Winged helix-turn-helix DNA-binding domain; IPR027417: P-loop containing nucleoside triphosphate hydrolase; IPR032675: Leucine-rich repeat domain, L domain-like	GO:0043531 MF: ADP binding	IPR002182; IPR011991; IPR027417; IPR032675	GO:0043531
Stress and defense related proteins/ Chaperone	5D_YR.TA002565_0478	Breeding progress	TraesCS5D01G098800.2	Disease resistance protein RPM1	PF00931: NB-ARC domain	IPR002182: NB-ARC; IPR011991: Winged helix-turn-helix DNA-binding domain; IPR027417: P-loop containing nucleoside triphosphate hydrolase; IPR032675: Leucine-rich repeat domain, L domain-like	GO:0043531 MF: ADP binding	IPR002182; IPR011991; IPR027417; IPR032675	GO:0043531
Antiporter and transmembrane proteins	5D_YR.TA002565_0478	Breeding progress	TraesCS5D01G098900.2	Nuclear export mediator factor Nemf	PF05833: Fibronectin-binding protein A N-terminus (FbpA); PF05670: Domain of unknown function (DUF814); PF00098: Zinc knuckle; PF11923: Domain of unknown function (DUF3441)	IPR001878: Zinc finger, CCHC-type; IPR008532: Domain of unknown function DUF814; IPR021846: Domain of unknown function DUF3441	GO:0003676 MF: nucleic acid binding;GO:0008270 MF: zinc ion binding	IPR001878; IPR008532; IPR021846	GO:0003676; GO:0008270
Others	5D_YR.TA002565_0478	Breeding progress	TraesCS5D01G099000.1	PsbP-like protein 1	PF01789: PsbP	IPR002683: PsbP family; IPR016123: Mog1/PsbP, alpha/beta/alpha sandwich	GO:0005509 MF: calcium ion binding;GO:0009523 CC: photosystem II;GO:0009654 CC: photosystem II oxygen evolving complex;GO:0015979 BP: photosynthesis;GO:0019898 CC: extrinsic component of membrane	IPR002683; IPR016123	GO:0005509; GO:0009523; GO:0009654; GO:0015979; GO:0019898
Transcription factors and translation	5D_YR.TA002565_0478	Breeding progress	TraesCS5D01G099100.1	MYB transcription factor	PF00249: Myb-like DNA-binding domain	IPR001005: SANT/Myb domain; IPR009057: Homeobox domain-like; IPR017930: Myb domain	GO:0003677 MF: DNA binding	IPR001005; IPR009057; IPR017930	GO:0003677
Others	5D_YR.TA002565_0478	Breeding progress	TraesCS5D01G099200.2	5-methylthioadenosine/S-adenosylhomocysteine deaminase	PF01979: Amidohydrolase family	IPR006680: Amidohydrolase-related; IPR011059: Metal-dependent hydrolase, composite domain; IPR032466: Metal-dependent hydrolase	GO:0016787 MF: hydrolase activity;GO:0016810 MF: hydrolase activity, acting on carbon-nitrogen (but not peptide) bonds	IPR006680; IPR011059; IPR032466	GO:0016787; GO:0016810
Others	5D_YR.TA002565_0478	Breeding progress	TraesCS5D01G099300.1	Pectinesterase	PF01095: Pectinesterase	IPR000070: Pectinesterase, catalytic; IPR011050: Pectin lyase fold/virulence factor; IPR012334: Pectin lyase fold; IPR033131: Pectinesterase, Asp active site	GO:0005618 CC: cell wall;GO:0030599 MF: pectinesterase activity;GO:0042545 BP: cell wall modification	IPR000070; IPR011050; IPR012334; IPR033131	GO:0005618; GO:0030599; GO:0042545
Others	5D_YR.TA002565_0478	Breeding progress	TraesCS5D01G099500.1	Prefoldin subunit 3	PF02996: Prefoldin subunit	IPR004127: Prefoldin alpha-like; IPR016655: Prefoldin subunit 3	GO:0006457 BP: protein folding;GO:0016272 CC: prefoldin complex	IPR004127; IPR016655	GO:0006457; GO:0016272
Signal transduction	5D_YR.TA002565_0478	Breeding progress	TraesCS5D01G099700.1	Glycerol-3-phosphate acyltransferase 3, putative	PF01553: Acyltransferase	IPR002123: Phospholipid/glycerol acyltransferase	GO:0008152 BP: metabolic process;GO:0016746 MF: transferase activity, transferring acyl groups	IPR002123	GO:0008152; GO:0016746
Redox homeostasis and detoxification	5D_YR.TA002565_0478	Breeding progress	TraesCS5D01G099800.1	30S ribosomal protein S6	PF01250: Ribosomal protein S6	IPR000529: Ribosomal protein S6; IPR014717: Translation elongation factor EF1B/ribosomal protein S6; IPR020814: Ribosomal protein S6, plastid/chloroplast; IPR020815: Ribosomal protein S6, conserved site	GO:0003735 MF: structural constituent of ribosome;GO:0005840 CC: ribosome;GO:0006412 BP: translation;GO:0019843 MF: rRNA binding	IPR000529; IPR014717; IPR020814; IPR020815	GO:0003735; GO:0005840; GO:0006412; GO:0019843
Others	5D_YR.TA002565_0478	Breeding progress	TraesCS5D01G099900.1	UPF0176 protein	PF12368: Rhodanase C-terminal; PF03959: Serine hydrolase (FSH1)	IPR001763: Rhodanese-like domain; IPR005645: Serine hydrolase FSH; IPR022111: Rhodanase, C-terminal; IPR029058: Alpha/Beta hydrolase fold	NA	IPR001763; IPR005645; IPR022111; IPR029058	NA
Others	5D_YR.TA002565_0478	Breeding progress	TraesCS5D01G100000.1	Xaa-pro dipeptidase, putative	PF05195: Aminopeptidase P, N-terminal domain; PF00557: Metallopeptidase family M24	IPR000994: Peptidase M24; IPR001714: Peptidase M24, methionine aminopeptidase; IPR007865: Aminopeptidase P, N-terminal; IPR028980: Creatinase/Aminopeptidase P, N-terminal; IPR029149: Creatinase/Aminopeptidase P/Spt16, N-terminal	GO:0004177 MF: aminopeptidase activity;GO:0030145 MF: manganese ion binding	IPR000994; IPR001714; IPR007865; IPR028980; IPR029149	GO:0004177; GO:0030145
Others	5D_YR.TA002565_0478	Breeding progress	TraesCS5D01G100100.1	DUF538 family protein (Protein of unknown function, DUF538)	PF04398: Protein of unknown function, DUF538	IPR007493: Protein of unknown function DUF538	NA	IPR007493	NA
Stress and defense related proteins/ Chaperone	5D_YR.TA002565_0478	Breeding progress	TraesCS5D01G100200.1	Stress responsive alpha-beta barrel domain protein	PF07876: Stress responsive A/B Barrel Domain	IPR011008: Dimeric alpha-beta barrel; IPR013097: Stress responsive alpha-beta barrel	NA	IPR011008; IPR013097	NA
Others	5D_YR.TA002565_0478	Breeding progress	TraesCS5D01G100400.1	Pectinesterase inhibitor	PF04043: Plant invertase/pectin methylesterase inhibitor	IPR006501: Pectinesterase inhibitor domain	GO:0004857 MF: enzyme inhibitor activity	IPR006501	GO:0004857
Antiporter and transmembrane proteins	5D_YR.TA002565_0478	Breeding progress	TraesCS5D01G100500.1	PAPA-1-like conserved region family protein, expressed	PF04795: PAPA-1-like conserved region; PF04438: HIT zinc finger	IPR006880: INO80 complex subunit B-like conserved region; IPR007529: Zinc finger, HIT-type	GO:0031011 CC: Ino80 complex	IPR006880; IPR007529	GO:0031011
Transcription factors and translation	5D_YR.TA002565_0478	Breeding progress	TraesCS5D01G100700.1	BZIP transcription factor	PF00170: bZIP transcription factor	IPR004827: Basic-leucine zipper domain	GO:0003700 MF: transcription factor activity, sequence-specific DNA binding;GO:0006355 BP: regulation of transcription, DNA-templated;GO:0043565 MF: sequence-specific DNA binding	IPR004827	GO:0003700; GO:0006355; GO:0043565
Repair, protection and cell wall modification	5D_YR.TA002565_0478	Breeding progress	TraesCS5D01G100800.1	DNA helicase	PF14551: MCM N-terminal domain; PF17207: MCM OB domain; PF00493: MCM2/3/5 family	IPR001208: MCM domain; IPR008050: DNA replication licensing factor Mcm7; IPR012340: Nucleic acid-binding, OB-fold; IPR018525: Mini-chromosome maintenance, conserved site; IPR027417: P-loop containing nucleoside triphosphate hydrolase; IPR027925: MCM N-terminal domain; IPR031327: Mini-chromosome maintenance protein; IPR033762: MCM OB domain	GO:0003677 MF: DNA binding;GO:0003678 MF: DNA helicase activity;GO:0005524 MF: ATP binding;GO:0005634 CC: nucleus;GO:0006260 BP: DNA replication;GO:0006270 BP: DNA replication initiation;GO:0042555 CC: MCM complex	IPR001208; IPR008050; IPR012340; IPR018525; IPR027417; IPR027925; IPR031327; IPR033762	GO:0003677; GO:0003678; GO:0005524; GO:0005634; GO:0006260; GO:0006270; GO:0042555
Osmo-protectant synthesis related protein	5D_YR.TA002565_0478	Breeding progress	TraesCS5D01G101100.1	Pseudouridine synthase family protein	PF00849: RNA pseudouridylate synthase	IPR006145: Pseudouridine synthase, RsuA/RluB/C/D/E/F; IPR006224: Pseudouridine synthase, RluC/RluD, conserved site; IPR020103: Pseudouridine synthase, catalytic domain	GO:0001522 BP: pseudouridine synthesis;GO:0003723 MF: RNA binding;GO:0009451 BP: RNA modification;GO:0009982 MF: pseudouridine synthase activity	IPR006145; IPR006224; IPR020103	GO:0001522; GO:0003723; GO:0009451; GO:0009982
Antiporter and transmembrane proteins	5D_YR.TA002565_0478	Breeding progress	TraesCS5D01G101200.1	DNA-directed RNA polymerase subunit	PF02150: RNA polymerases M/15 Kd subunit; PF01096: Transcription factor S-II (TFIIS)	IPR001222: Zinc finger, TFIIS-type; IPR001529: DNA-directed RNA polymerase, M/15kDa subunit; IPR012164: DNA-directed RNA polymerase subunit/transcription factor S; IPR019761: DNA-directed RNA polymerase M, 15kDa subunit, conserved site	GO:0003676 MF: nucleic acid binding;GO:0006351 BP: transcription, DNA-templated;GO:0008270 MF: zinc ion binding	IPR001222; IPR001529; IPR012164; IPR019761	GO:0003676; GO:0006351; GO:0008270
Others	5D_YR.TA002565_0478	Breeding progress	TraesCS5D01G101300.1	ADP-ribosylation factor family protein	PF00025: ADP-ribosylation factor family	IPR005225: Small GTP-binding protein domain; IPR006687: Small GTPase superfamily, SAR1-type; IPR006689: Small GTPase superfamily, ARF/SAR type; IPR027417: P-loop containing nucleoside triphosphate hydrolase	GO:0005525 MF: GTP binding;GO:0005622 CC: intracellular;GO:0006886 BP: intracellular protein transport	IPR005225; IPR006687; IPR006689; IPR027417	GO:0005525; GO:0005622; GO:0006886
Others	5D_YR.TA002565_0478	Breeding progress	TraesCS5D01G101400.1	Pentatricopeptide repeat-containing protein, putative	PF01535: PPR repeat; PF13041: PPR repeat family	IPR002885: Pentatricopeptide repeat	NA	IPR002885	NA
Antiporter and transmembrane proteins	5D_YR.TA002565_0478	Breeding progress	TraesCS5D01G101500.1	Lysine/histidine transporter	PF01490: Transmembrane amino acid transporter protein	IPR013057: Amino acid transporter, transmembrane domain	NA	IPR013057	NA
Antiporter and transmembrane proteins	5D_YR.TA002565_0478	Breeding progress	TraesCS5D01G101600.1	Transmembrane protein 205	PF13664: Domain of unknown function (DUF4149)	IPR025423: Domain of unknown function DUF4149	NA	IPR025423	NA
Antiporter and transmembrane proteins	5D_YR.TA002565_0478	Breeding progress	TraesCS5D01G101700.1	DNA topoisomerase	PF06839: GRF zinc finger	IPR010666: Zinc finger, GRF-type	GO:0008270 MF: zinc ion binding	IPR010666	GO:0008270
Others	5D_YR.TA002565_0478	Breeding progress	TraesCS5D01G101800.1	calmodulin-binding protein (DUF1645)	PF07816: Protein of unknown function (DUF1645)	IPR012442: Protein of unknown function DUF1645, plant	NA	IPR012442	NA
Antiporter and transmembrane proteins	5D_YR.TA002565_0478	Breeding progress	TraesCS5D01G101900.1	CTP synthase	PF06418: CTP synthase N-terminus; PF00117: Glutamine amidotransferase class-I	IPR004468: CTP synthase; IPR017456: CTP synthase, N-terminal; IPR017926: Glutamine amidotransferase; IPR027417: P-loop containing nucleoside triphosphate hydrolase; IPR029062: Class I glutamine amidotransferase-like	GO:0003883 MF: CTP synthase activity;GO:0006221 BP: pyrimidine nucleotide biosynthetic process	IPR004468; IPR017456; IPR017926; IPR027417; IPR029062	GO:0003883; GO:0006221
Stress and defense related proteins/ Chaperone	5D_YR.TA002565_0478	Breeding progress	TraesCS5D01G102000.2	Calmodulin-binding protein	PF07887: Calmodulin binding protein-like	IPR012416: CALMODULIN-BINDING PROTEIN60	GO:0005516 MF: calmodulin binding;GO:0006950 BP: response to stress	IPR012416	GO:0005516; GO:0006950
Stress and defense related proteins/ Chaperone	5D_YR.TA002565_0478	Breeding progress	TraesCS5D01G102100.1	Calmodulin-binding protein	PF07887: Calmodulin binding protein-like	IPR012416: CALMODULIN-BINDING PROTEIN60	GO:0005516 MF: calmodulin binding;GO:0006950 BP: response to stress	IPR012416	GO:0005516; GO:0006950
Others	5D_YR.TA002565_0478	Breeding progress	TraesCS5D01G102200.1	B3 domain-containing protein	PF02362: B3 DNA binding domain	IPR003340: B3 DNA binding domain; IPR015300: DNA-binding pseudobarrel domain	GO:0003677 MF: DNA binding	IPR003340; IPR015300	GO:0003677
Stress and defense related proteins/ Chaperone	5D_YR.TA002565_0478	Breeding progress	TraesCS5D01G102300.1	Calmodulin-binding protein, putative, expressed	PF07887: Calmodulin binding protein-like	IPR012416: CALMODULIN-BINDING PROTEIN60	GO:0005516 MF: calmodulin binding;GO:0006950 BP: response to stress	IPR012416	GO:0005516; GO:0006950
Antiporter and transmembrane proteins	5D_YR.TA002565_0478	Breeding progress	TraesCS5D01G102400.1	Dehydration-induced 19-like protein	PF05605: Drought induced 19 protein (Di19), zinc-binding; PF14571: Stress-induced protein Di19, C-terminal	IPR008598: Drought induced 19 protein type, zinc-binding domain; IPR013083: Zinc finger, RING/FYVE/PHD-type; IPR027935: Protein dehydration-induced 19, C-terminal	NA	IPR008598; IPR013083; IPR027935	NA
Antiporter and transmembrane proteins	5D_YR.TA002565_0478	Breeding progress	TraesCS5D01G102600.1	Cellulose synthase-like protein	PF14570: RING/Ubox like zinc-binding domain; PF03552: Cellulose synthase	IPR005150: Cellulose synthase; IPR013083: Zinc finger, RING/FYVE/PHD-type; IPR029044: Nucleotide-diphospho-sugar transferases	GO:0016020 CC: membrane;GO:0016760 MF: cellulose synthase (UDP-forming) activity;GO:0030244 BP: cellulose biosynthetic process	IPR005150; IPR013083; IPR029044	GO:0016020; GO:0016760; GO:0030244
Stress and defense related proteins/ Chaperone	5D_YR.TA002565_0478	Breeding progress	TraesCS5D01G102700.1	Pathogenesis-related protein 1	PF00407: Pathogenesis-related protein Bet v I family	IPR000916: Bet v I/Major latex protein; IPR023393: START-like domain	GO:0006952 BP: defense response;GO:0009607 BP: response to biotic stimulus	IPR000916; IPR023393	GO:0006952; GO:0009607
Repair, protection and cell wall modification	5D_YR.TA002565_0478	Breeding progress	TraesCS5D01G102900.1	Pectin lyase-like superfamily protein	PF00295: Glycosyl hydrolases family 28	IPR000743: Glycoside hydrolase, family 28; IPR006626: Parallel beta-helix repeat; IPR011050: Pectin lyase fold/virulence factor; IPR012334: Pectin lyase fold	GO:0004650 MF: polygalacturonase activity;GO:0005975 BP: carbohydrate metabolic process	IPR000743; IPR006626; IPR011050; IPR012334	GO:0004650; GO:0005975
Others	5D_YR.TA002565_0478	Breeding progress	TraesCS5D01G103100.1	Sn1-specific diacylglycerol lipase alpha	PF01764: Lipase (class 3)	IPR002921: Fungal lipase-like domain; IPR029058: Alpha/Beta hydrolase fold	GO:0006629 BP: lipid metabolic process	IPR002921; IPR029058	GO:0006629
Others	5D_YR.TA002565_0478	Breeding progress	TraesCS5D01G103300.1	Trafficking protein particle complex subunit 10	PF12584: Trafficking protein particle complex subunit 10, TRAPPC10	IPR011990: Tetratricopeptide-like helical domain; IPR022233: TRAPP II complex, TRAPPC10	GO:0005515 MF: protein binding	IPR011990; IPR022233	GO:0005515
Antiporter and transmembrane proteins	5D_YR.TA002565_0478	Breeding progress	TraesCS5D01G103400.1	Metacaspase-1	PF06943: LSD1 zinc finger; PF00656: Caspase domain	IPR005735: Zinc finger, LSD1-type; IPR029030: Caspase-like domain	NA	IPR005735; IPR029030	NA
Others	5D_YR.TA002565_0478	Breeding progress	TraesCS5D01G103500.1	Trichome birefringence-like protein	PF14416: PMR5 N terminal Domain; PF13839: GDSL/SGNH-like Acyl-Esterase family found in Pmr5 and Cas1p	IPR025846: PMR5 N-terminal domain; IPR026057: PC-Esterase	NA	IPR025846; IPR026057	NA
Antiporter and transmembrane proteins	5D_YR.TA002565_0478	Breeding progress	TraesCS5D01G103800.1	NADP-dependent alkenal double bond reductase	PF16884: N-terminal domain of oxidoreductase; PF00107: Zinc-binding dehydrogenase	IPR011032: GroES-like; IPR013149: Alcohol dehydrogenase, C-terminal; IPR016040: NAD(P)-binding domain; IPR020843: Polyketide synthase, enoylreductase domain	GO:0016491 MF: oxidoreductase activity;GO:0055114 BP: oxidation-reduction process	IPR011032; IPR013149; IPR016040; IPR020843	GO:0016491; GO:0055114
Signal transduction	5D_YR.TA002565_0478	Breeding progress	TraesCS5D01G103900.3	F-box/LRR-repeat protein	PF13516: Leucine Rich repeat	IPR001611: Leucine-rich repeat; IPR006553: Leucine-rich repeat, cysteine-containing subtype; IPR032675: Leucine-rich repeat domain, L domain-like	GO:0005515 MF: protein binding	IPR001611; IPR006553; IPR032675	GO:0005515
Antiporter and transmembrane proteins	5D_YR.TA002565_0478	Breeding progress	TraesCS5D01G104100.1	Oligopeptide transporter, putative	PF03169: OPT oligopeptide transporter protein	IPR004648: Tetrapeptide transporter, OPT1/isp4; IPR004813: Oligopeptide transporter, OPT superfamily	GO:0055085 BP: transmembrane transport	IPR004648; IPR004813	GO:0055085
Stress and defense related proteins/ Chaperone	5D_YR.TA002565_0478	Breeding progress	TraesCS5D01G104200.1	Universal stress protein	PF00582: Universal stress protein family	IPR006015: Universal stress protein A; IPR006016: UspA; IPR014729: Rossmann-like alpha/beta/alpha sandwich fold	GO:0006950 BP: response to stress	IPR006015; IPR006016; IPR014729	GO:0006950
Stress and defense related proteins/ Chaperone	5D_YR.TA002565_0478	Breeding progress	TraesCS5D01G104300.1	Universal stress protein	PF00582: Universal stress protein family	IPR006015: Universal stress protein A; IPR006016: UspA; IPR014729: Rossmann-like alpha/beta/alpha sandwich fold	GO:0006950 BP: response to stress	IPR006015; IPR006016; IPR014729	GO:0006950
Antiporter and transmembrane proteins	5D_YR.TA002565_0478	Breeding progress	TraesCS5D01G104400.1	Pentatricopeptide repeat-containing protein	PF01535: PPR repeat; PF13041: PPR repeat family; PF14432: DYW family of nucleic acid deaminases	IPR002885: Pentatricopeptide repeat; IPR011990: Tetratricopeptide-like helical domain; IPR032867: DYW domain	GO:0005515 MF: protein binding;GO:0008270 MF: zinc ion binding	IPR002885; IPR011990; IPR032867	GO:0005515; GO:0008270
Signal transduction	5D_YR.TA002565_0478	Breeding progress	TraesCS5D01G104600.2	Nucleoside diphosphate kinase	PF00334: Nucleoside diphosphate kinase	IPR001564: Nucleoside diphosphate kinase; IPR023005: Nucleoside diphosphate kinase, active site	GO:0004550 MF: nucleoside diphosphate kinase activity;GO:0006165 BP: nucleoside diphosphate phosphorylation;GO:0006183 BP: GTP biosynthetic process;GO:0006228 BP: UTP biosynthetic process;GO:0006241 BP: CTP biosynthetic process	IPR001564; IPR023005	GO:0004550; GO:0006165; GO:0006183; GO:0006228; GO:0006241
Others	5D_YR.TA002565_0478	Breeding progress	TraesCS5D01G104800.1	RAN GTPase-activating protein 2	PF13943: WPP domain	IPR025265: WPP domain	NA	IPR025265	NA
Signal transduction	5D_YR.TA002565_0478	Breeding progress	TraesCS5D01G104900.1	ATP-dependent 6-phosphofructokinase	PF00365: Phosphofructokinase	IPR000023: Phosphofructokinase domain; IPR012004: Pyrophosphate-dependent phosphofructokinase TP0108-type; IPR022953: ATP-dependent 6-phosphofructokinase	GO:0003872 MF: 6-phosphofructokinase activity;GO:0005524 MF: ATP binding;GO:0006002 BP: fructose 6-phosphate metabolic process;GO:0006096 BP: glycolytic process	IPR000023; IPR012004; IPR022953	GO:0003872; GO:0005524; GO:0006002; GO:0006096
Stress and defense related proteins/ Chaperone	5D_YR.TA002565_0478	Breeding progress	TraesCS5D01G105100.1	Calmodulin-binding protein, putative, expressed	PF07887: Calmodulin binding protein-like	IPR012416: CALMODULIN-BINDING PROTEIN60	GO:0005516 MF: calmodulin binding;GO:0006950 BP: response to stress	IPR012416	GO:0005516; GO:0006950
Others	5D_YR.TA002565_0478	Breeding progress	TraesCS5D01G105200.1	Kinesin-related protein	PF00307: Calponin homology (CH) domain; PF00225: Kinesin motor domain	IPR001715: Calponin homology domain; IPR001752: Kinesin motor domain; IPR027417: P-loop containing nucleoside triphosphate hydrolase	GO:0003777 MF: microtubule motor activity;GO:0005515 MF: protein binding;GO:0005524 MF: ATP binding;GO:0007018 BP: microtubule-based movement;GO:0008017 MF: microtubule binding	IPR001715; IPR001752; IPR027417	GO:0003777; GO:0005515; GO:0005524; GO:0007018; GO:0008017
Others	5D_YR.TA002565_0478	Breeding progress	TraesCS5D01G105300.1	Rapid alkalinization factor (RALF) family protein	PF05498: Rapid ALkalinization Factor (RALF)	IPR008801: Rapid ALkalinization Factor	NA	IPR008801	NA
Redox homeostasis and detoxification	5D_YR.TA002565_0478	Breeding progress	TraesCS5D01G105400.1	5'-adenylylsulfate reductase-like 5	PF00085: Thioredoxin	IPR012336: Thioredoxin-like fold; IPR013766: Thioredoxin domain	GO:0045454 BP: cell redox homeostasis	IPR012336; IPR013766	GO:0045454
Redox homeostasis and detoxification	5D_YR.TA002565_0478	Breeding progress	TraesCS5D01G105500.1	elongation factor Ts family protein	PF00575: S1 RNA binding domain; PF00889: Elongation factor TS	IPR001816: Translation elongation factor EFTs/EF1B; IPR003029: S1 domain; IPR009060: UBA-like; IPR012340: Nucleic acid-binding, OB-fold; IPR014039: Translation elongation factor EFTs/EF1B, dimerisation; IPR018101: Translation elongation factor Ts, conserved site; IPR022967: RNA-binding domain, S1	GO:0003676 MF: nucleic acid binding;GO:0003746 MF: translation elongation factor activity;GO:0005515 MF: protein binding;GO:0005622 CC: intracellular;GO:0006414 BP: translational elongation	IPR001816; IPR003029; IPR009060; IPR012340; IPR014039; IPR018101; IPR022967	GO:0003676; GO:0003746; GO:0005515; GO:0005622; GO:0006414

## Sheet: Table Sxl6
Chr_F	Trait	MarkerPic	Boundary Min	Boundary Max	Interval Lenght	F_value	ProbF	FDR_P	Mean_A1A1_T_1	Mean_A2A2_T_1	Mean_A1A1_T_2	Mean_A2A2_T_2	Number of SNP in the cluster
1A	SN	SN_1A,W135_CNUC,AX-158539988	21618859	21618859	0	20.4849	1.03574e-05	0.0489655	750.435	718.676	343.598	365.332	1
1B	KN	KN_1B,W135_HOBI,AX-86175582	511449170	511449170	0	15.8906	9.43363e-05	0.120317	29785.7	28378.9	9990.01	10668.5	1
2A	PBW	PBW_2A,W135_EJZU,AX-158572584	675079920	677043172	1.96325	24.6084	2.85382e-06	0.00226297	493.571	469.044	167.252	181.054	23
2B	GSC	GSC_2B,W135_AWKM,AX-110986013	132508155	133170605	0.66245	16.1107	8.51367e-05	0.298661	72.4544	72.7241	72.5229	72.258	6
2B	KN	KN_2B,W135_CYXP,AX-158547515	10860941	10860941	0	16.005	8.92068e-05	0.120317	28491.6	29907.3	10609.1	9925.55	1
3B	KN	KN_3B,W135_ASFH,AX-110491239	802761306	802761306	0	16.9145	5.72956e-05	0.120317	28575.6	30105.4	10551	9850.11	1
4B	KN	KN_4B,W135_DDGO,AX-158550452	26797417	26797417	0	16.378	7.43659e-05	0.120317	28850.4	31268.6	10414.2	9523.25	1
4B	KNSp	KNSp_4B,W135_EYJX,AX-158582311	665934275	665934275	0	16.3664	7.4789e-05	0.441965	40.1098	45.3142	27.7763	25.9417	1
4D	SN	SN_4D,W15_ABXL,BS00067452_51	366276019	366276019	0	21.0366	7.98e-06	0.0471627	753.712	721.642	342.084	360.547	1
5A	GPC	GPC_5A,W15_AJUJ,Kukri_c75091_154	679124382	679666083	0.541701	19.6416	1.69805e-05	0.0442134	14.3008	14.4709	13.3682	13.0627	12
5A	GY	GY_5A,W135_FCEU,AX-158584882	422053937	422053937	0	29.6438	1.5268e-07	0.0029806	233.829	249.112	75.5831	68.0028	1
5A	GY	GY_5A,W135_AJOW,AX-109490438	428942432	428942432	0	28.5285	2.5219e-07	0.0029806	232.554	246.177	76.3185	69.2108	1
5A	KN	KN_5A,W135_DYSK,AX-158564956	553423778	564646075	11.2223	17.0934	5.70535e-05	0.120317	29113	29143.3	10292.2	10313	10
5A	PBW	PBW_5A,W135_FCEU,AX-158584882	422053937	422084004	0.030067	21.5776	6.46271e-06	0.00343368	484.921	487.215	171.131	171.853	2
5B	KN	KN_5B,W135_CEUU,AX-158533922	670709955	670792985	0.08303	17.2141	4.96626e-05	0.120317	29530.2	28338.3	9939.03	11026.7	2
5D	PBW	PBW_5D,W135_CSJH,AX-158543087	559728805	562834171	3.10537	23.5634	2.68596e-06	0.00204432	494.756	472.742	165.632	179.905	16
6A	KNSp	KNSp_6A,W15_ALIV,RAC875_c40653_612	602706822	602708877	0.002055	19.7071	1.4981e-05	0.118041	39.9017	41.8756	28.2305	26.1216	3
6B	PBW	PBW_6B,W15_AOUR,Tdurum_contig54917_597	32324253	33717276	1.39302	24.8201	2.91764e-06	0.00259506	493.695	474.106	163.777	180.921	2
7B	SN	SN_7B,W15_ABEP,BS00044443_51	498149722	498149722	0	22.1172	5.105e-06	0.0435623	746.256	702.438	345.666	373.611	2

## Sheet: Table Sxl7
Chr_F	Marker_peack	Pos	Marker_peack_code	Traits	Gene.names	Human.Readable.Description	Pfam.IDs.Description.	Interpro.IDs.Description.	GO.IDs.Description.via.Interpro	Pfam.IDs	Interpro.IDs	GO.IDs.via.Interpro
3B	AX-110491239	802761306	W135_ASFH	KN	TraesCS3B01G569200.1	Leucine-rich repeat receptor-like protein kinase family protein	PF08263: Leucine rich repeat N-terminal domain; PF13516: Leucine Rich repeat; PF13855: Leucine rich repeat; PF00560: Leucine Rich Repeat	IPR001611: Leucine-rich repeat; IPR003591: Leucine-rich repeat, typical subtype; IPR013210: Leucine-rich repeat-containing N-terminal, plant-type; IPR032675: Leucine-rich repeat domain, L domain-like	GO:0005515 MF: protein binding	PF08263; PF13516; PF13855; PF00560	IPR001611; IPR003591; IPR013210; IPR032675	GO:0005515
3B	AX-110491239	802761306	W135_ASFH	KN	TraesCS3B01G568000.1	Polyubiquitin	PF00240: Ubiquitin family	IPR000626: Ubiquitin domain; IPR019956: Ubiquitin; IPR029071: Ubiquitin-related domain	GO:0005515 MF: protein binding	PF00240	IPR000626; IPR019956; IPR029071	GO:0005515
3B	AX-110491239	802761306	W135_ASFH	KN	TraesCS3B01G568100.1	Metacaspase-1	PF00656: Caspase domain	NA	NA	PF00656	NA	NA
3B	AX-110491239	802761306	W135_ASFH	KN	TraesCS3B01G568200.1	Heat shock transcription factor	PF00447: HSF-type DNA-binding	IPR000232: Heat shock factor (HSF)-type, DNA-binding; IPR011991: Winged helix-turn-helix DNA-binding domain	GO:0003700 MF: transcription factor activity, sequence-specific DNA binding;GO:0005634 CC: nucleus;GO:0006355 BP: regulation of transcription, DNA-templated;GO:0043565 MF: sequence-specific DNA binding	PF00447	IPR000232; IPR011991	GO:0003700; GO:0005634; GO:0006355; GO:0043565
3B	AX-110491239	802761306	W135_ASFH	KN	TraesCS3B01G568400.1	F-box family protein	NA	IPR032675: Leucine-rich repeat domain, L domain-like	NA	NA	IPR032675	NA
3B	AX-110491239	802761306	W135_ASFH	KN	TraesCS3B01G568500.1	ATP dependent RNA helicase	PF00270: DEAD/DEAH box helicase; PF00271: Helicase conserved C-terminal domain	IPR001650: Helicase, C-terminal; IPR011545: DEAD/DEAH box helicase domain; IPR014001: Helicase superfamily 1/2, ATP-binding domain; IPR014014: RNA helicase, DEAD-box type, Q motif; IPR027417: P-loop containing nucleoside triphosphate hydrolase	GO:0003676 MF: nucleic acid binding;GO:0005524 MF: ATP binding	PF00270; PF00271	IPR001650; IPR011545; IPR014001; IPR014014; IPR027417	GO:0003676; GO:0005524
3B	AX-110491239	802761306	W135_ASFH	KN	TraesCS3B01G568600.1	Polyphenol oxidase	PF00264: Common central domain of tyrosinase; PF12142: Polyphenol oxidase middle domain; PF12143: Protein of unknown function (DUF_B2219)	IPR002227: Tyrosinase copper-binding domain; IPR008922: Uncharacterised domain, di-copper centre; IPR022739: Polyphenol oxidase, central domain; IPR022740: Polyphenol oxidase, C-terminal	GO:0004097 MF: catechol oxidase activity;GO:0008152 BP: metabolic process;GO:0016491 MF: oxidoreductase activity;GO:0055114 BP: oxidation-reduction process	PF00264; PF12142; PF12143	IPR002227; IPR008922; IPR022739; IPR022740	GO:0004097; GO:0008152; GO:0016491; GO:0055114
3B	AX-110491239	802761306	W135_ASFH	KN	TraesCS3B01G568300.1	Heat shock transcription factor	PF00447: HSF-type DNA-binding	IPR000232: Heat shock factor (HSF)-type, DNA-binding; IPR011991: Winged helix-turn-helix DNA-binding domain	GO:0003700 MF: transcription factor activity, sequence-specific DNA binding;GO:0005634 CC: nucleus;GO:0006355 BP: regulation of transcription, DNA-templated;GO:0043565 MF: sequence-specific DNA binding	PF00447	IPR000232; IPR011991	GO:0003700; GO:0005634; GO:0006355; GO:0043565
3B	AX-110491239	802761306	W135_ASFH	KN	TraesCS3B01G568800.1	Kunitz trypsin inhibitor	PF00197: Trypsin and protease inhibitor	IPR002160: Proteinase inhibitor I3, Kunitz legume; IPR011065: Kunitz inhibitor ST1-like	GO:0004866 MF: endopeptidase inhibitor activity	PF00197	IPR002160; IPR011065	GO:0004866
3B	AX-110491239	802761306	W135_ASFH	KN	TraesCS3B01G568900.1	Polyubiquitin	PF00240: Ubiquitin family	IPR000626: Ubiquitin domain; IPR019956: Ubiquitin; IPR029071: Ubiquitin-related domain	GO:0005515 MF: protein binding	PF00240	IPR000626; IPR019956; IPR029071	GO:0005515
3B	AX-110491239	802761306	W135_ASFH	KN	TraesCS3B01G569000.1	Polyubiquitin	PF00240: Ubiquitin family	IPR000626: Ubiquitin domain; IPR019956: Ubiquitin; IPR029071: Ubiquitin-related domain	GO:0005515 MF: protein binding	PF00240	IPR000626; IPR019956; IPR029071	GO:0005515
3B	AX-110491239	802761306	W135_ASFH	KN	TraesCS3B01G570700.1	Leucine-rich repeat receptor-like protein kinase family protein	PF08263: Leucine rich repeat N-terminal domain; PF13855: Leucine rich repeat; PF00560: Leucine Rich Repeat	IPR001611: Leucine-rich repeat; IPR003591: Leucine-rich repeat, typical subtype; IPR013210: Leucine-rich repeat-containing N-terminal, plant-type; IPR032675: Leucine-rich repeat domain, L domain-like	GO:0005515 MF: protein binding	PF08263; PF13855; PF00560	IPR001611; IPR003591; IPR013210; IPR032675	GO:0005515
3B	AX-110491239	802761306	W135_ASFH	KN	TraesCS3B01G569300.1	Leucine-rich repeat receptor-like protein kinase family protein	PF00560: Leucine Rich Repeat	IPR001611: Leucine-rich repeat; IPR032675: Leucine-rich repeat domain, L domain-like	GO:0005515 MF: protein binding	PF00560	IPR001611; IPR032675	GO:0005515
3B	AX-110491239	802761306	W135_ASFH	KN	TraesCS3B01G569400.1	Leucine-rich repeat receptor-like protein kinase family protein, putative	PF13855: Leucine rich repeat; PF00560: Leucine Rich Repeat	IPR001611: Leucine-rich repeat; IPR032675: Leucine-rich repeat domain, L domain-like	GO:0005515 MF: protein binding	PF13855; PF00560	IPR001611; IPR032675	GO:0005515
3B	AX-110491239	802761306	W135_ASFH	KN	TraesCS3B01G569500.1	Alpha amylase inhibitor	PF00197: Trypsin and protease inhibitor	IPR002160: Proteinase inhibitor I3, Kunitz legume; IPR011065: Kunitz inhibitor ST1-like	GO:0004866 MF: endopeptidase inhibitor activity	PF00197	IPR002160; IPR011065	GO:0004866
3B	AX-110491239	802761306	W135_ASFH	KN	TraesCS3B01G569600.1	F-box domain containing protein	PF00646: F-box domain	IPR001810: F-box domain	GO:0005515 MF: protein binding	PF00646	IPR001810	GO:0005515
3B	AX-110491239	802761306	W135_ASFH	KN	TraesCS3B01G569700.1	Polyubiquitin	PF00240: Ubiquitin family	IPR000626: Ubiquitin domain; IPR019956: Ubiquitin; IPR029071: Ubiquitin-related domain	GO:0005515 MF: protein binding	PF00240	IPR000626; IPR019956; IPR029071	GO:0005515
3B	AX-110491239	802761306	W135_ASFH	KN	TraesCS3B01G569800.1	NBS-LRR resistance-like protein	PF00931: NB-ARC domain	IPR002182: NB-ARC; IPR011991: Winged helix-turn-helix DNA-binding domain; IPR027417: P-loop containing nucleoside triphosphate hydrolase; IPR032675: Leucine-rich repeat domain, L domain-like	GO:0043531 MF: ADP binding	PF00931	IPR002182; IPR011991; IPR027417; IPR032675	GO:0043531
3B	AX-110491239	802761306	W135_ASFH	KN	TraesCS3B01G569900.1	receptor kinase 1	PF00069: Protein kinase domain; PF00931: NB-ARC domain	IPR000719: Protein kinase domain; IPR002182: NB-ARC; IPR008271: Serine/threonine-protein kinase, active site; IPR011009: Protein kinase-like domain; IPR011991: Winged helix-turn-helix DNA-binding domain; IPR017441: Protein kinase, ATP binding site; IPR027417: P-loop containing nucleoside triphosphate hydrolase; IPR032675: Leucine-rich repeat domain, L domain-like	GO:0004672 MF: protein kinase activity;GO:0005524 MF: ATP binding;GO:0006468 BP: protein phosphorylation;GO:0043531 MF: ADP binding	PF00069; PF00931	IPR000719; IPR002182; IPR008271; IPR011009; IPR011991; IPR017441; IPR027417; IPR032675	GO:0004672; GO:0005524; GO:0006468; GO:0043531
3B	AX-110491239	802761306	W135_ASFH	KN	TraesCS3B01G570000.1	F-box domain containing protein	PF12937: F-box-like	IPR001810: F-box domain	GO:0005515 MF: protein binding	PF12937	IPR001810	GO:0005515
3B	AX-110491239	802761306	W135_ASFH	KN	TraesCS3B01G570300.1	Ubiquitin	PF00240: Ubiquitin family	IPR000626: Ubiquitin domain; IPR019956: Ubiquitin; IPR029071: Ubiquitin-related domain	GO:0005515 MF: protein binding	PF00240	IPR000626; IPR019956; IPR029071	GO:0005515
3B	AX-110491239	802761306	W135_ASFH	KN	TraesCS3B01G570400.1	NBS-LRR resistance-like protein	PF00931: NB-ARC domain	IPR002182: NB-ARC; IPR011991: Winged helix-turn-helix DNA-binding domain; IPR027417: P-loop containing nucleoside triphosphate hydrolase; IPR032675: Leucine-rich repeat domain, L domain-like	GO:0043531 MF: ADP binding	PF00931	IPR002182; IPR011991; IPR027417; IPR032675	GO:0043531
3B	AX-110491239	802761306	W135_ASFH	KN	TraesCS3B01G570500.1	Myb/SANT-like DNA-binding domain protein	PF12776: Myb/SANT-like DNA-binding domain	IPR024752: Myb/SANT-like domain	NA	PF12776	IPR024752	NA
3B	AX-110491239	802761306	W135_ASFH	KN	TraesCS3B01G570600.1	receptor kinase 1	PF00069: Protein kinase domain	IPR000719: Protein kinase domain; IPR008271: Serine/threonine-protein kinase, active site; IPR011009: Protein kinase-like domain	GO:0004672 MF: protein kinase activity;GO:0005524 MF: ATP binding;GO:0006468 BP: protein phosphorylation	PF00069	IPR000719; IPR008271; IPR011009	GO:0004672; GO:0005524; GO:0006468
3B	AX-110491239	802761306	W135_ASFH	KN	TraesCS3B01G567600.1	RING finger protein	PF00097: Zinc finger, C3HC4 type (RING finger); PF06803: Protein of unknown function (DUF1232)	IPR001841: Zinc finger, RING-type; IPR010652: Protein of unknown function DUF1232; IPR013083: Zinc finger, RING/FYVE/PHD-type; IPR017907: Zinc finger, RING-type, conserved site; IPR018957: Zinc finger, C3HC4 RING-type	GO:0005515 MF: protein binding;GO:0008270 MF: zinc ion binding;GO:0046872 MF: metal ion binding	PF00097; PF06803	IPR001841; IPR010652; IPR013083; IPR017907; IPR018957	GO:0005515; GO:0008270; GO:0046872
3B	AX-110491239	802761306	W135_ASFH	KN	TraesCS3B01G567700.1	Serpin family protein	PF00079: Serpin (serine protease inhibitor)	IPR023796: Serpin domain	NA	PF00079	IPR023796	NA
3B	AX-110491239	802761306	W135_ASFH	KN	TraesCS3B01G567800.1	Polyubiquitin	PF00240: Ubiquitin family	IPR000626: Ubiquitin domain; IPR019956: Ubiquitin; IPR029071: Ubiquitin-related domain	GO:0005515 MF: protein binding	PF00240	IPR000626; IPR019956; IPR029071	GO:0005515
3B	AX-110491239	802761306	W135_ASFH	KN	TraesCS3B01G567900.1	Serpin family protein	PF00079: Serpin (serine protease inhibitor)	IPR023796: Serpin domain	NA	PF00079	IPR023796	NA
3B	AX-110491239	802761306	W135_ASFH	KN	TraesCS3B01G572500.1	Pectin lyase-like superfamily protein	PF00295: Glycosyl hydrolases family 28	IPR000743: Glycoside hydrolase, family 28; IPR006626: Parallel beta-helix repeat; IPR011050: Pectin lyase fold/virulence factor; IPR012334: Pectin lyase fold	GO:0004650 MF: polygalacturonase activity;GO:0005975 BP: carbohydrate metabolic process	PF00295	IPR000743; IPR006626; IPR011050; IPR012334	GO:0004650; GO:0005975
3B	AX-110491239	802761306	W135_ASFH	KN	TraesCS3B01G572600.1	F-box protein, putative (DUF295)	PF03478: Protein of unknown function (DUF295)	IPR005174: Domain unknown function DUF295	NA	PF03478	IPR005174	NA
3B	AX-110491239	802761306	W135_ASFH	KN	TraesCS3B01G572700.1	Polygalacturonase	PF00295: Glycosyl hydrolases family 28	IPR000743: Glycoside hydrolase, family 28; IPR011050: Pectin lyase fold/virulence factor; IPR012334: Pectin lyase fold	GO:0004650 MF: polygalacturonase activity;GO:0005975 BP: carbohydrate metabolic process	PF00295	IPR000743; IPR011050; IPR012334	GO:0004650; GO:0005975
3B	AX-110491239	802761306	W135_ASFH	KN	TraesCS3B01G572900.1	E3 ubiquitin-protein ligase	PF03145: Seven in absentia protein family	IPR008974: TRAF-like; IPR013010: Zinc finger, SIAH-type; IPR013083: Zinc finger, RING/FYVE/PHD-type; IPR018121: Seven-in-absentia protein, TRAF-like domain	GO:0005515 MF: protein binding;GO:0005634 CC: nucleus;GO:0006511 BP: ubiquitin-dependent protein catabolic process;GO:0007275 BP: multicellular organism development;GO:0008270 MF: zinc ion binding	PF03145	IPR008974; IPR013010; IPR013083; IPR018121	GO:0005515; GO:0005634; GO:0006511; GO:0007275; GO:0008270
3B	AX-110491239	802761306	W135_ASFH	KN	TraesCS3B01G571300.1	Endo-1,3-beta-glucanase	PF00332: Glycosyl hydrolases family 17	IPR000490: Glycoside hydrolase family 17; IPR017853: Glycoside hydrolase superfamily	GO:0004553 MF: hydrolase activity, hydrolyzing O-glycosyl compounds;GO:0005975 BP: carbohydrate metabolic process	PF00332	IPR000490; IPR017853	GO:0004553; GO:0005975
3B	AX-110491239	802761306	W135_ASFH	KN	TraesCS3B01G571400.1	Beta-1,3-glucanase	PF00332: Glycosyl hydrolases family 17	IPR000490: Glycoside hydrolase family 17; IPR017853: Glycoside hydrolase superfamily	GO:0004553 MF: hydrolase activity, hydrolyzing O-glycosyl compounds;GO:0005975 BP: carbohydrate metabolic process	PF00332	IPR000490; IPR017853	GO:0004553; GO:0005975
3B	AX-110491239	802761306	W135_ASFH	KN	TraesCS3B01G568700.1	Dirigent protein	PF03018: Dirigent-like protein	IPR004265: Plant disease resistance response protein	NA	PF03018	IPR004265	NA
3B	AX-110491239	802761306	W135_ASFH	KN	TraesCS3B01G571600.1	Leucine-rich repeat receptor-like protein kinase family protein	PF08263: Leucine rich repeat N-terminal domain; PF13516: Leucine Rich repeat	IPR001611: Leucine-rich repeat; IPR003591: Leucine-rich repeat, typical subtype; IPR013210: Leucine-rich repeat-containing N-terminal, plant-type; IPR032675: Leucine-rich repeat domain, L domain-like	GO:0005515 MF: protein binding	PF08263; PF13516	IPR001611; IPR003591; IPR013210; IPR032675	GO:0005515
3B	AX-110491239	802761306	W135_ASFH	KN	TraesCS3B01G571700.1	Leucine-rich repeat receptor-like protein kinase family protein	PF13855: Leucine rich repeat; PF00560: Leucine Rich Repeat	IPR001611: Leucine-rich repeat; IPR003591: Leucine-rich repeat, typical subtype; IPR032675: Leucine-rich repeat domain, L domain-like	GO:0005515 MF: protein binding	PF13855; PF00560	IPR001611; IPR003591; IPR032675	GO:0005515
3B	AX-110491239	802761306	W135_ASFH	KN	TraesCS3B01G571800.1	Leucine-rich repeat receptor-like protein kinase family protein	PF08263: Leucine rich repeat N-terminal domain; PF13516: Leucine Rich repeat; PF13855: Leucine rich repeat; PF00560: Leucine Rich Repeat	IPR001611: Leucine-rich repeat; IPR003591: Leucine-rich repeat, typical subtype; IPR013210: Leucine-rich repeat-containing N-terminal, plant-type; IPR032675: Leucine-rich repeat domain, L domain-like	GO:0005515 MF: protein binding	PF08263; PF13516; PF13855; PF00560	IPR001611; IPR003591; IPR013210; IPR032675	GO:0005515
3B	AX-110491239	802761306	W135_ASFH	KN	TraesCS3B01G571900.1	Leucine-rich repeat receptor-like protein kinase family protein	PF08263: Leucine rich repeat N-terminal domain; PF13516: Leucine Rich repeat; PF13855: Leucine rich repeat; PF00560: Leucine Rich Repeat	IPR001611: Leucine-rich repeat; IPR003591: Leucine-rich repeat, typical subtype; IPR013210: Leucine-rich repeat-containing N-terminal, plant-type; IPR032675: Leucine-rich repeat domain, L domain-like	GO:0005515 MF: protein binding	PF08263; PF13516; PF13855; PF00560	IPR001611; IPR003591; IPR013210; IPR032675	GO:0005515
3B	AX-110491239	802761306	W135_ASFH	KN	TraesCS3B01G572000.1	Leucine-rich repeat receptor-like protein kinase family protein	PF08263: Leucine rich repeat N-terminal domain; PF13855: Leucine rich repeat; PF00560: Leucine Rich Repeat	IPR001611: Leucine-rich repeat; IPR003591: Leucine-rich repeat, typical subtype; IPR013210: Leucine-rich repeat-containing N-terminal, plant-type; IPR032675: Leucine-rich repeat domain, L domain-like	GO:0005515 MF: protein binding	PF08263; PF13855; PF00560	IPR001611; IPR003591; IPR013210; IPR032675	GO:0005515
3B	AX-110491239	802761306	W135_ASFH	KN	TraesCS3B01G570800.1	Long chain acyl-CoA synthetase	PF00501: AMP-binding enzyme	IPR000873: AMP-dependent synthetase/ligase	GO:0003824 MF: catalytic activity;GO:0008152 BP: metabolic process	PF00501	IPR000873	GO:0003824; GO:0008152
3B	AX-110491239	802761306	W135_ASFH	KN	TraesCS3B01G570900.1	Mitochondrial import inner membrane translocase subunit TIM16	PF03656: Pam16	IPR001623: DnaJ domain	NA	PF03656	IPR001623	NA
3B	AX-110491239	802761306	W135_ASFH	KN	TraesCS3B01G571000.1	Gamma-secretase subunit APH1-like	PF06105: Aph-1 protein	IPR009294: Gamma-secretase subunit Aph-1	GO:0016021 CC: integral component of membrane;GO:0016485 BP: protein processing;GO:0043085 BP: positive regulation of catalytic activity	PF06105	IPR009294	GO:0016021; GO:0016485; GO:0043085
[truncated: 540 more rows]

## Sheet: Table Sxl8
SNP.Markers.elements	Traits.and.water.regimes.names	Total.SNP	Marker.names	Chr_F	Pos_F
[truncated: 137 more rows]

[truncated: 1 more sheets: Table Sxl9]
